# Supplementary material for: Delays in seeking, reaching and access to quality cancer care in sub-Saharan Africa: a systematic review
Source: PubMed Central journal article supplement — BMJ Open. 2023 Apr 13;13(4):e067715. doi: 10.1136/bmjopen-2022-067715 (PMC10106057; doi:10.1136/bmjopen-2022-067715), 2023-04-13
Supplement: bmjopen-2022-067715.draft_revisions.pdf [file bmjopen-2022-067715.draft_revisions.pdf]

# BMJ Open

BMJ Open is committed to open peer review. As part of this commitment we make the peer review history of every article we publish publicly available.

When an article is published we post the peer reviewers' comments and the authors' responses online. We also post the versions of the paper that were used during peer review. These are the versions that the peer review comments apply to.

The versions of the paper that follow are the versions that were submitted during the peer review process. They are not the versions of record or the final published versions. They should not be cited or distributed as the published version of this manuscript.

BMJ Open is an open access journal and the full, final, typeset and author-corrected version of record of the manuscript is available on our site with no access controls, subscription charges or pay-per-view fees (<http://bmjopen.bmj.com>).

If you have any questions on BMJ Open's open peer review process please email [info.bmjopen@bmj.com](mailto:info.bmjopen@bmj.com)

# BMJ Open

## Delays in Seeking, Reaching and Access to Quality Cancer Care in Sub-Saharan Africa: A Systematic Review of the Literature

|                               |                                                                                                                                                                                                                                                                                                                                                                                                                                                                                                                                                                                                                                                                                                                                                                                                                                                           |
|-------------------------------|-----------------------------------------------------------------------------------------------------------------------------------------------------------------------------------------------------------------------------------------------------------------------------------------------------------------------------------------------------------------------------------------------------------------------------------------------------------------------------------------------------------------------------------------------------------------------------------------------------------------------------------------------------------------------------------------------------------------------------------------------------------------------------------------------------------------------------------------------------------|
| Journal:                      | <i>BMJ Open</i>                                                                                                                                                                                                                                                                                                                                                                                                                                                                                                                                                                                                                                                                                                                                                                                                                                           |
| Manuscript ID                 | bmjopen-2022-067715                                                                                                                                                                                                                                                                                                                                                                                                                                                                                                                                                                                                                                                                                                                                                                                                                                       |
| Article Type:                 | Original research                                                                                                                                                                                                                                                                                                                                                                                                                                                                                                                                                                                                                                                                                                                                                                                                                                         |
| Date Submitted by the Author: | 28-Aug-2022                                                                                                                                                                                                                                                                                                                                                                                                                                                                                                                                                                                                                                                                                                                                                                                                                                               |
| Complete List of Authors:     | Lombe, Dorothy; MidCentral District Health Board, Radiation Oncology Mwamba, Monde; ZAMBART<br>Msadabwe, Susan; Cancer Diseases Hospital<br>Bond, Virginia ; London School of Hygiene & Tropical Medicine and ZAMBART, Social Science<br>Simwinga, Musonda; Zambart<br>Ssemata, Andrew Sentoogo; The Medical Research Council/ Uganda Virus Research Institute and London School of Hygiene & Tropical Medicine (MRC/UVRI & LSHTM) Uganda Research Unit<br>Muhumuza, Richard; The Medical Research Council/ Uganda Virus Research Institute and London School of Hygiene & Tropical Medicine (MRC/UVRI & LSHTM) Uganda Research Unit<br>Seeley, Janet; London School of Hygiene and Tropical Medicine, Department of Global Health & Development<br>Mwaka, Amos; Makerere University CHS, Department of Medicine<br>Aggarwal, Ajay; King's College London |
| Keywords:                     | Adult oncology < ONCOLOGY, Urological tumours < ONCOLOGY, PUBLIC HEALTH, Health policy < HEALTH SERVICES ADMINISTRATION & MANAGEMENT                                                                                                                                                                                                                                                                                                                                                                                                                                                                                                                                                                                                                                                                                                                      |
|                               |                                                                                                                                                                                                                                                                                                                                                                                                                                                                                                                                                                                                                                                                                                                                                                                                                                                           |

SCHOLARONE™  
Manuscripts

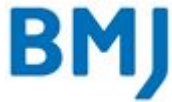

I, the Submitting Author has the right to grant and does grant on behalf of all authors of the Work (as defined in the below author licence), an exclusive licence and/or a non-exclusive licence for contributions from authors who are: i) UK Crown employees; ii) where BMJ has agreed a CC-BY licence shall apply, and/or iii) in accordance with the terms applicable for US Federal Government officers or employees acting as part of their official duties; on a worldwide, perpetual, irrevocable, royalty-free basis to BMJ Publishing Group Ltd ("BMJ") its licensees and where the relevant Journal is co-owned by BMJ to the co-owners of the Journal, to publish the Work in this journal and any other BMJ products and to exploit all rights, as set out in our [licence](#).

The Submitting Author accepts and understands that any supply made under these terms is made by BMJ to the Submitting Author unless you are acting as an employee on behalf of your employer or a postgraduate student of an affiliated institution which is paying any applicable article publishing charge ("APC") for Open Access articles. Where the Submitting Author wishes to make the Work available on an Open Access basis (and intends to pay the relevant APC), the terms of reuse of such Open Access shall be governed by a Creative Commons licence – details of these licences and which [Creative Commons](#) licence will apply to this Work are set out in our licence referred to above.

Other than as permitted in any relevant BMJ Author's Self Archiving Policies, I confirm this Work has not been accepted for publication elsewhere, is not being considered for publication elsewhere and does not duplicate material already published. I confirm all authors consent to publication of this Work and authorise the granting of this licence.

1  
2  
3 **Delays in Seeking, Reaching, and Access to Quality Cancer Care in Sub-Saharan Africa:**  
4 **A Systematic Review of the Literature**  
5

6 Dorothy Chilambe Lombe<sup>1</sup>

7 Monde Mwamba<sup>2</sup>

8 Susan Msadabwe<sup>3</sup>

9 Virginia Bond<sup>2,4</sup>

10 Musonda Simwinga<sup>2</sup>

11 Andrew Sentoogo Ssemata<sup>5</sup>

12 Richard Muhumuza<sup>5</sup>

13 Janet Seeley<sup>4,5</sup>

14 Amos Deo Mwaka<sup>6</sup>

15 Ajay Aggarwal<sup>4,7</sup>  
16  
17  
18  
19

20 <sup>1</sup>Regional Cancer Treatment Services MidCentral District Health Board, New Zealand

21 <sup>2</sup>Zambart, School of Public Health, Ridgeway Campus, University of Zambia, Lusaka,  
22 Zambia

23 <sup>3</sup>Cancer Diseases Hospital, Lusaka Zambia

24 <sup>4</sup>London School of Hygiene & Tropical Medicine (LSHTM) Keppel Street, London, WC1E  
25 7HT

26 <sup>5</sup>The Medical Research Council/ Uganda Virus Research Institute and London School of  
27 Hygiene & Tropical Medicine (MRC/UVRI & LSHTM) Uganda Research Unit. P.O. Box 49  
28 Entebbe

29 <sup>6</sup>Department of Medicine, Faculty of Medicine, Gulu University, Gulu, Uganda.

30 <sup>7</sup>Institute of Cancer Policy, King's College London, London SE1 9RT, UK  
31  
32  
33  
34  
35

36 Keywords: sub Saharan Africa, cancer, delays, seeking care, diagnosis, treatment  
37  
38  
39  
40

41 Corresponding author: Dr Dorothy C. Lombe

42 Email: [dorothylombe@yahoo.com](mailto:dorothylombe@yahoo.com)

43 Mobile: +64 21 148 3919  
44  
45  
46  
47  
48  
49  
50  
51  
52  
53  
54  
55  
56  
57  
58  
59  
60

## Abstract

### Objectives

The cancer burden in sub-Saharan Africa continues to grow. Late presentation and delays translate into poor outcomes. We undertook a systematic review to present a summary of the barriers to cancer control in Sub-Saharan Africa using the three delays framework.

### Methods

The search was conducted in PubMed and Embase for articles published between January 1995 and March 2021. The inclusion criteria were solid cancers, Sub-Saharan African countries, and quantitative or mixed method research published in the English language. The exclusion criteria were reviews, conference abstracts, pediatric and hematological cancers, and qualitative research papers.

### Findings

Of the 6225 articles identified, 57 studies were included concentrated in Nigeria and Ethiopia. Breast and cervical cancer represented 70%. Most studies were conducted in the hospital setting using a cross sectional survey design. Major issues identified included 1. The indirect and direct costs associated with diagnosis and treatment, 2. Lack of coordination between primary, secondary, and tertiary health care sectors, 3. Inadequate staffing 4. Trust and reliance on traditional healers

### Conclusions

Breast and cervical cancers are the focus of most research in SSA. Other high burden cancers are not addressed and this raises concern as the pathways to quality care across cancers is not homogenous. In addition, research continues to focus on 3 or 4 countries, and without greater evaluation of all systems and contexts, gaps will continue to widen. Cognizance of the multiple barriers from developing a cancer to treatment is important for policymakers and experts to build resilient and effective cancer control programs.

## INTRODUCTION

The cancer control agenda has globally received a high level of political recognition.<sup>1,2</sup> In sub-Saharan Africa (SSA), with an age standardized incidence and mortality rate of 128.2 and 87.2 per 100 000 respectively, cancer is becoming a leading public health problem.<sup>3</sup> There is a growing emphasis that the successful translation of commitments to support cancer control policy into substantial reductions in cancer morbidity and mortality must occur on a locally adapted evidence-based platform but robust local research is lacking in contrast with developed nations.

Countries in SSA operate in an environment of low resources, which has resulted in cancer management largely focusing on those presenting with overt symptomatic disease.<sup>4,5</sup> The system level challenges are heterogeneous across SSA but factors germane to all countries include limited health care financing, inadequate financial protection (universal health coverage), inadequate infrastructure development as well as the need for health systems to manage a dual burden of infectious disease and growing non-communicable diseases.<sup>5-8</sup>

The lack of coordination and fragmented pathways in cancer care at all stages including prevention, symptom awareness, diagnosis, treatment, and post treatment care makes cancer hard to manage in developing nations and ultimately results in high levels of premature mortality.<sup>9</sup> Interventions occur in silos within three distinct groups 1) across specific cancer types which are prioritized; 2) across prevention, treatment, and palliation; 3) across primary, secondary, and tertiary health care sectors. Additionally, building strong system linkages to coordinate cancer care across primary, secondary, and tertiary sectors within country are generally overlooked and this results in critical delays.<sup>9</sup>

Fragmented pathways of care and research priorities are also reflective of the dependence on external international financial donors which tend to support their specific agendas perpetuating silos of development.<sup>10,11</sup> This approach can be considered reductionist as it fails to consider the system and structural drivers of inequalities in access to diagnosis and treatment.

Evaluation of the unique social, economic, geographic, and cultural determinants for late diagnosis and poor treatment outcomes are imperative to provide locally generated evidence. This will ensure the effective implementation of national cancer control programs.<sup>12,13</sup> These factors are not just context specific (e.g., country, region) but also tumour specific. An array of factors including access to care (distance and cost), quality of care, coordination of care across health care sectors, education and training, as well as intricate personal and community relationships (values, beliefs, socioeconomic parameters, gender) need to be interpreted in each situation and considered explicitly.

1  
2  
3 Empirical work has sought to identify the factors influencing cancer diagnosis and treatment  
4 delay.<sup>14</sup> However, to our knowledge there have been no attempts to synthesize the available  
5 evidence from primary quantitative research undertaken in the SSA context to inform cancer  
6 control policies and identify gaps in the current research literature. Gaps would include  
7 country settings, tumour types, or at-risk populations which remain under-researched. In  
8 addition, robust study designs need to be employed to provide further insights as part of the  
9 system evaluation.  
10  
11  
12  
13

14 In this review, we used the 'Three Delays' framework to support the synthesis and  
15 classification of our research studies focusing on barriers to diagnosis and treatment. The  
16 Three delays framework has been used in other health conditions e.g. child and maternal  
17 health, and emergency medicine, however, to date it has not been applied to cancer care  
18 delivery.<sup>15,16</sup> The framework considers three contexts and three delays. The three contexts  
19 are the: Patient context (perceptions of disease, barriers to care, cost of illness); Provider  
20 context (care process quality and outcome evaluation, health care workers perceived system  
21 barriers); Community context (proximity and physical accessibility of services in the  
22 community). The three delays are: seeking care; reaching care; and receiving quality care<sup>17</sup>  
23 Delay 1 seeking care: This is the delay in recognizing illness and deciding to seek appropriate  
24 medical help outside the home. Delay 2 reaching care: This is the delay in reaching an  
25 appropriate health facility. Delay 3 receiving quality care: This is the delay in receiving quality  
26 care after reaching the health facility. The interconnection in the delays can be seen in Figure  
27 1.  
28  
29  
30  
31  
32  
33  
34  
35

36 We undertook a systematic review of the literature on sub-Saharan Africa to identify areas  
37 requiring further evaluation according to country, tumour type, and setting to target  
38 resources and interventions that reduce disparities.  
39

## 40 **METHODS**

### 41 ***Information sources and search strategy***

42 The literature search was conducted on 8<sup>th</sup> March 2021 in PubMed and Embase for articles  
43 published between January 1995 and March 2021, following the Preferred Reporting Items  
44 for Systematic Reviews and Meta-Analyses (PRISMA) guidance. The full search strategy and  
45 PRISMA diagram are available in Appendix 1 and Figure 2 respectively.  
46  
47  
48

### 49 ***Eligibility criteria***

50 The study included published articles in the English language that focused on solid cancers.  
51 The primary research was focused on SSA countries. Types of studies included quantitative  
52 (surveys, observational studies) or studies using mixed methods research methodologies.  
53 The quantitative studies had to include patients who had received a diagnosis of cancer.  
54  
55

56 We excluded studies that included paediatric populations, haematologic malignancies, as  
57 well assessments of public perceptions and awareness of cancer since the focus was on  
58 patients with a cancer diagnosis.  
59  
60

### ***Selection process***

We used the systematic review tool Covidence.<sup>18</sup> Two reviewers (DL and MM) screened the abstracts and full text articles independently with a third reviewer (AA) to resolve any conflicts. The two primary reviewers extracted and validated the entries independently before merging the outputs.

### ***Data items***

Data extracted included the year of article publication; country of study; demographic characteristics (age, gender, HIV status, education, marital status, employment, income level); country level setting; disease subsite; study design; type of delay investigated.

### ***Assessment of risk of bias***

Taking into consideration the heterogeneous nature of the available literature the risk of bias assessment at selection was based on the principles of a tool developed by Hoy et al.<sup>19</sup> DL, AA and MM discussed the included studies over a series of virtual meetings exploring the validity of each of the included studies: external (population and sampling frame) and internal (direct participant data collection, acceptable subject definition, mode of data collection).

### ***Patient and Public Involvement***

Patients and members of the public were not involved in the design, conduct or reporting of the systematic review. We intend for patients to be stakeholders in the subsequent Delphi process that will utilize the results of this review.

## **RESULTS**

### ***Study selection***

An initial search identified 6225 articles of which 193 underwent full text review (Figure 2). Fifty-seven studies were included in our final sample and data extracted.<sup>20-75</sup> Figure 3 and Table 1 summarizes the characteristics of the included studies.

### ***Country and setting profile***

The majority of studies were conducted in Nigeria, 15 (26%), Ethiopia, eight (14%), and South Africa, 7 (12%). Five (9%) were undertaken in Uganda, four (7%) in Kenya, and three (5%) in Rwanda. Four (7%) studies were carried out in more than one country. Only 9% (n=5) of the studies were carried out at the national level. Of the remaining studies, two-thirds were conducted at the hospital level (n=38) and a quarter (n=14) were conducted at the regional level.

### ***Research design***

Two-thirds of included studies used a cross sectional survey design. The rest of the studies included analysis of patient-level data collected retrospectively (23%) or prospectively (11%). Case control and Delphi studies represented 4% of studies.

### ***Tumour types***

Breast cancer was the most studied tumour type for our research question (53%, n=29) followed by cervix (18%, n=10). 21% of studies (n=12) evaluated multiple tumour types whilst there were smaller studies on colorectal cancer (n=2) and Kaposi's sarcoma (n=1). There were



1  
2  
3 no eligible studies on other high burden diseases in SSA such as prostate cancer and  
4 esophageal cancer identified in the literature.  
5  
6

### 7 ***Participant population***

8 Patients identified in a hospital setting were the target population in 48 out of 56 studies. In  
9 the other studies, the target populations were: patients and clinicians (n=3), clinicians only  
10 (n=1), a combination of clinicians, public health opinion leaders and NGOs (n=1), patients in  
11 a community setting (n=2), and patients and health facility administrators (n=1)  
12  
13

### 14 **Three delays framework**

15 We synthesized the empirical studies into the three delay areas. 37% (n=21) of the studies  
16 investigated all 3 delays whilst 42% (n=24) focused on 2 delays and 21% (n=12) on 1 delay.  
17 Table 1 outlines the referenced studies drawing forth the reasons identified as contributing  
18 to each type of systems delay. Table 2 provides a summary of the three delays.  
19  
20  
21  
22  
23  
24  
25  
26  
27  
28  
29  
30  
31  
32  
33  
34  
35  
36  
37  
38  
39  
40  
41  
42  
43  
44  
45  
46  
47  
48  
49  
50  
51  
52  
53  
54  
55  
56  
57  
58  
59  
60

Table 1. Study characteristics

| First author name         | Year | Cancer type                  | Country                                   | Sample size | Study Design    |
|---------------------------|------|------------------------------|-------------------------------------------|-------------|-----------------|
| Gebremariam <sup>31</sup> | 2021 | Breast                       | Ethiopia                                  | 223         | Retrospective   |
| Zelege <sup>43</sup>      | 2021 | Cervical                     | Ethiopia                                  | 410         | Retrospective   |
| Mapanga <sup>28</sup>     | 2021 | Lung                         | South Africa                              | 27          | Delphi process  |
| Nakaganda <sup>26</sup>   | 2020 | Multisite <sup>1</sup>       | Uganda                                    | 359         | Cross-sectional |
| Tesfaw <sup>60</sup>      | 2020 | Breast                       | Ethiopia                                  | 426         | Retrospective   |
| Tesfaw <sup>62</sup>      | 2020 | Breast                       | Ethiopia                                  | 371         | Cross-sectional |
| Reibold <sup>22</sup>     | 2020 | Breast                       | Ethiopia                                  | 51          | Cross-sectional |
| Knapp <sup>51</sup>       | 2020 | Breast                       | Nigeria                                   | 609         | Retrospective   |
| Leng <sup>59</sup>        | 2020 | Multisite <sup>2</sup>       | Nigeria                                   | 186         | Cross-sectional |
| Togawa <sup>52</sup>      | 2020 | Breast                       | Namibia<br>Nigeria<br>Uganda<br>Zambia    | 1518        | Cross-sectional |
| Swanson <sup>73</sup>     | 2020 | cervical                     | Uganda                                    | 268         | Cross-sectional |
| Foerster <sup>37</sup>    | 2020 | Breast                       | Uganda,<br>Zambia,<br>Namibia,<br>Nigeria | 1429        | Cross-sectional |
| Dereje <sup>42</sup>      | 2020 | Cervical                     | Ethiopia                                  | 212         | Cross-sectional |
| Dereje <sup>41</sup>      | 2020 | Cervical                     | Ethiopia                                  | 231         | Cross-sectional |
| Agodirin <sup>75</sup>    | 2020 | Breast                       | Nigeria                                   | 420         | Cross-sectional |
| Martin <sup>25</sup>      | 2019 | cancer type<br>not specified | Rwanda                                    | 73          | Cross-sectional |
| Page <sup>63</sup>        | 2019 | cervical<br>cancer           | Kenya                                     | 505         | Prospective     |
| Low <sup>40</sup>         | 2019 | Multisite <sup>3</sup>       | Uganda                                    | 100         | Cross-sectional |
| Wambalaba <sup>66</sup>   | 2019 | Multisite <sup>4</sup>       | Kenya                                     | 1048        | Retrospective   |
| Grosse Frie <sup>54</sup> | 2019 | Breast                       | Mali                                      | 124         | Cross-sectional |
| Yang <sup>38</sup>        | 2019 | Breast                       | Tanzania                                  | 196         | Cross-sectional |
| Schleimer <sup>24</sup>   | 2019 | Breast                       | Rwanda                                    | 151         | Retrospective   |
| Foerster <sup>58</sup>    | 2019 | Breast                       | Uganda<br>Nigeria<br>Namibia              | 1335        | Prospective     |
| Tapera <sup>53</sup>      | 2019 | cervical                     | Zimbabwe                                  | 78          | Cross-sectional |
| Agodirin <sup>57</sup>    | 2019 | Breast                       | Nigeria                                   | 237         | Cross-sectional |
| Rayne <sup>30</sup>       | 2019 | Breast                       | South Africa                              | 252         | Cross-sectional |
| Subramanian <sup>49</sup> | 2019 | Breast                       | Kenya                                     | 800         | Cross-sectional |
| Olarewaju <sup>39</sup>   | 2019 | breast                       | Nigeria                                   | 275         | Cross-sectional |
| Ajah <sup>27</sup>        | 2019 | Multisite <sup>5</sup>       | Nigeria                                   | 95          | Cross-sectional |
| Martei <sup>56</sup>      | 2019 | Multisite <sup>6</sup>       | Botswana                                  | 286         | Retrospective   |

|                                    |      |                           |                        |      |                 |
|------------------------------------|------|---------------------------|------------------------|------|-----------------|
| <b>Herbst<sup>21</sup></b>         | 2018 | Colorectal                | South Africa           | 162  | Retrospective   |
| <b>Anakwenze<sup>47</sup></b>      | 2018 | Multisite <sup>7</sup>    | Botswana               | 214  | Cross-sectional |
| <b>Moodley<sup>50</sup></b>        | 2018 | Breast                    | South Africa           | 201  | Cross-sectional |
| <b>Joffe<sup>23</sup></b>          | 2018 | Breast                    | South Africa           | 499  | Cross-sectional |
| <b>Awofeso<sup>67</sup></b>        | 2018 | Breast,<br>Cervical       | Nigeria                | 105  | Cross-sectional |
| <b>Bhatia<sup>64</sup></b>         | 2018 | Multisite <sup>8</sup>    | Botswana               | 214  | Cross-sectional |
| <b>Oladeji<sup>29</sup></b>        | 2017 | Multisite <sup>9</sup>    | Nigeria                | 218  | Cross-sectional |
| <b>Jedy-Agba<sup>36</sup></b>      | 2017 | Breast                    | Nigeria                | 316  | Case-control    |
| <b>Alatise<sup>55</sup></b>        | 2017 | colorectal<br>cancer      | Nigeria                | 127  | Cross-sectional |
| <b>Cacala<sup>48</sup></b>         | 2017 | Breast                    | South Africa           | 172  | Prospective     |
| <b>Brinton<sup>45</sup></b>        | 2016 | Breast<br>cancer          | Ghana                  | 1184 | Cross-sectional |
| <b>Mlange<sup>61</sup></b>         | 2016 | Cervical                  | Tanzania               | 202  | Cross-sectional |
| <b>Mwaka<sup>70</sup></b>          | 2015 | Cervical                  | Uganda                 | 149  | Cross-sectional |
| <b>Long<sup>44</sup></b>           | 2015 | Multisite <sup>10</sup>   | Cameroon               | 220  | Cross-sectional |
| <b>Pace<sup>34</sup></b>           | 2015 | Breast                    | Rwanda                 | 144  | Cross-sectional |
| <b>Tadesse<sup>71</sup></b>        | 2015 | cervical                  | Ethiopia               | 198  | Cross-sectional |
| <b>Dickens<sup>72</sup></b>        | 2014 | Breast                    | South Africa           | 1071 | Retrospective   |
| <b>De Boer<sup>69</sup></b>        | 2014 | Kaposi<br>sarcoma         | Uganda                 | 161  | Retrospective   |
| <b>Ntirenganya<sup>68</sup></b>    | 2014 | Breast                    | Rwanda<br>Sierra Leone | 6820 | Cross-sectional |
| <b>Fasunla<sup>46</sup></b>        | 2013 | Sinonasal<br>Malignancies | Nigeria                | 61   | Cross-sectional |
| <b>Ibrahim<sup>65</sup></b>        | 2011 | cervical<br>cancer        | Sudan                  | 197  | Retrospective   |
| <b>Anyanwu<sup>20</sup></b>        | 2011 | breast                    | Nigeria                | 275  | Retrospective   |
| <b>Otieno<sup>32</sup></b>         | 2010 | Breast                    | Kenya                  | 166  | Cross-sectional |
| <b>Ezeome<sup>35</sup></b>         | 2009 | Breast                    | Nigeria                | 164  | Cross-sectional |
| <b>Clegg-Lampthey<sup>74</sup></b> | 2009 | breast                    | Ghana                  | 101  | Cross-sectional |
| <b>Ukwenya<sup>33</sup></b>        | 2008 | Breast                    | Nigeria                | 111  | Cross-sectional |

1 - Cervix, Kaposi's sarcoma, breast, prostate, esophagus; 2 - breast, cervical, head and neck, prostate; 3 - KS, cervical cancer, breast cancer, esophageal cancer, head and neck cancer, non-Hodgkin lymphoma, vulvovaginal, prostate, conjunctival squam cell ca, penile, melanoma; 4 - Cervix, Breast, Esophagus, Prostate, Ovary, Colon, Thyroid, Pancreatic, Lung, Liver; 5 - Cervical, ovarian, endometrial, vulva, choriocarcinoma, leiomyosarcoma; 6 - cervical, breast, prostate, esophageal, lung, uterine, ovarian, colorectal, head and neck cancers, Kaposi sarcoma; 7 - Cervical, breast, head and neck, vulvar, kaposi sarcoma, endometrial, penile, anal, esophageal, lymphoma, prostate; 8 - Cervical, Breast, Head and neck, Vulvar, Kaposi's sarcoma, Endometrial, Penile, Anal, Oesophageal, Lymphoma, Prostate; 9 - Uterine cervix, breast, head and neck, prostate, GIT; 10 - skin, breast, colorectal, gynecologic, anal

Table 2. Reasons for delays in 3 frameworks

| Reasons for seeking care delay                                                                                                                                                                                                                                                                                                                                                                                                                                                                                                                                                                                                                                                                                                                                                                                                          | Reasons for reaching care delay                                                                                                                                                                                                                                                                                                                                                                                                                                                                                                                                                                                                                                                                                                                                                                                                                                                                                                | Reasons for receiving quality care delay                                                                                                                                                                                                                                                                                                                                                                                                                                                                                                                                                                                                                                                                                                                                                                                                                                                                                                                                                                                               |
|-----------------------------------------------------------------------------------------------------------------------------------------------------------------------------------------------------------------------------------------------------------------------------------------------------------------------------------------------------------------------------------------------------------------------------------------------------------------------------------------------------------------------------------------------------------------------------------------------------------------------------------------------------------------------------------------------------------------------------------------------------------------------------------------------------------------------------------------|--------------------------------------------------------------------------------------------------------------------------------------------------------------------------------------------------------------------------------------------------------------------------------------------------------------------------------------------------------------------------------------------------------------------------------------------------------------------------------------------------------------------------------------------------------------------------------------------------------------------------------------------------------------------------------------------------------------------------------------------------------------------------------------------------------------------------------------------------------------------------------------------------------------------------------|----------------------------------------------------------------------------------------------------------------------------------------------------------------------------------------------------------------------------------------------------------------------------------------------------------------------------------------------------------------------------------------------------------------------------------------------------------------------------------------------------------------------------------------------------------------------------------------------------------------------------------------------------------------------------------------------------------------------------------------------------------------------------------------------------------------------------------------------------------------------------------------------------------------------------------------------------------------------------------------------------------------------------------------|
| <ul style="list-style-type: none"> <li>• Anticipated expense of treatment</li> <li>• Anticipated long waiting time at clinic</li> <li>• Belief in witchcraft</li> <li>• Busy schedule</li> <li>• Denial</li> <li>• Distance</li> <li>• Economic impact of taking time off work</li> <li>• Embarrassment</li> <li>• Family and friends' disapproval</li> <li>• Fear of being asked to stop habits e.g. smoking</li> <li>• Fear of death</li> <li>• Fear of diagnosis</li> <li>• Fear of doctors</li> <li>• Fear of dying</li> <li>• Fear of job loss</li> <li>• Fear of losing part of body (e.g. breast)</li> <li>• Fear of missing family commitments because of treatment</li> <li>• Fear of telling people of illness</li> <li>• Fear of treatment</li> <li>• Fear treatment is painful</li> <li>• Financial incapability</li> </ul> | <ul style="list-style-type: none"> <li>• Dependence on others for transport</li> <li>• Difficulty making appointment or reaching doctor</li> <li>• Distance</li> <li>• Earlier alternative treatment</li> <li>• Family responsibilities</li> <li>• High cost of prediagnostic costs</li> <li>• High cost of transport</li> <li>• Inability to afford clinic visits</li> <li>• Lack of knowledge of estimated distance to nearest service</li> <li>• Lack of money (for transport)</li> <li>• Lack of navigation in primary care</li> <li>• Lack of needed caregiver to accompany to facilities</li> <li>• Long investigation time at first contact</li> <li>• Misdiagnosis at lower levels</li> <li>• Obligations at home</li> <li>• Time restraints</li> <li>• Turned away from clinics for arriving late</li> <li>• Was told by health care worker there was no treatment for disease</li> <li>• Work commitments</li> </ul> | <ul style="list-style-type: none"> <li>• Absence of multidisciplinary team care</li> <li>• Burn out and disinterest of health care workers</li> <li>• Cancer not priority</li> <li>• Chemotherapy stock outs</li> <li>• Communication barriers</li> <li>• Declining treatment</li> <li>• Defaulting because of side effects of drugs</li> <li>• Diagnostic delay</li> <li>• Failure to come back for follow up diagnostic or treatment appointments</li> <li>• Failure to find accommodation as outpatients close to treatment centre</li> <li>• Family commitments</li> <li>• Fear of treatment (e.g. mastectomy)</li> <li>• Fear of wasting doctor's time</li> <li>• Few specialists</li> <li>• Financial incapability</li> <li>• High cost of medicines</li> <li>• High patient volume compared to resources</li> <li>• Lack of consent</li> <li>• Lack of continuity of care by same healthcare workers</li> <li>• Lack of palliative care and counselling services</li> <li>• Lack of pathology and screening services</li> </ul> |

1  
2  
3  
4  
5  
6  
7  
8  
9  
10  
11  
12  
13  
14  
15  
16  
17  
18  
19  
20  
21  
22  
23  
24  
25  
26  
27  
28  
29  
30  
31  
32  
33  
34  
35  
36  
37  
38  
39  
40  
41  
42  
43  
44  
45  
46  
47  
48  
49  
50  
51  
52  
53  
54  
55  
56  
57  
58  
59  
60

|                                                                                                                                                                                                                                                                                                                                                                                                                                                                                                                                                                                                                                                                                                                                                                                                                                                                                                                                                                                                                                                       |  |                                                                                                                                                                                                                                                                                                                                                                                                                                                                                                                                                                                                                                                                                                                                                                                                                                                                                                                                                                                                                                                                                                                        |
|-------------------------------------------------------------------------------------------------------------------------------------------------------------------------------------------------------------------------------------------------------------------------------------------------------------------------------------------------------------------------------------------------------------------------------------------------------------------------------------------------------------------------------------------------------------------------------------------------------------------------------------------------------------------------------------------------------------------------------------------------------------------------------------------------------------------------------------------------------------------------------------------------------------------------------------------------------------------------------------------------------------------------------------------------------|--|------------------------------------------------------------------------------------------------------------------------------------------------------------------------------------------------------------------------------------------------------------------------------------------------------------------------------------------------------------------------------------------------------------------------------------------------------------------------------------------------------------------------------------------------------------------------------------------------------------------------------------------------------------------------------------------------------------------------------------------------------------------------------------------------------------------------------------------------------------------------------------------------------------------------------------------------------------------------------------------------------------------------------------------------------------------------------------------------------------------------|
| <ul style="list-style-type: none"> <li>• Ignorance on available treatment</li> <li>• Ignorance on how to seek healthcare</li> <li>• Lack of awareness of symptoms</li> <li>• Lack of personal initiative</li> <li>• Lack of trust in health system</li> <li>• Low education</li> <li>• No health insurance</li> <li>• No one to look after children</li> <li>• Obligations at home</li> <li>• Preference for alternative therapies (herbal, homeopathy, Chinese, acupuncture)</li> <li>• Preference for care abroad</li> <li>• Preference for food supplements/organic foods</li> <li>• Preference for prayers and spiritual intervention</li> <li>• Pregnancy/lactation/menopause</li> <li>• Prior bad experience at health centre of hospital</li> <li>• Prioritising day to day survival over seeking help</li> <li>• Putting others needs first <ul style="list-style-type: none"> <li>• Secrecy</li> </ul> </li> <li>• Stigma</li> <li>• Transport challenges (e.g. cost)</li> <li>• Travelled away from home** (out of comfort zone)</li> </ul> |  | <ul style="list-style-type: none"> <li>• Lack of smoking cessation clinics</li> <li>• Lack of specific appointments with specialists</li> <li>• Language barrier</li> <li>• Long appointments, waiting periods</li> <li>• Management of pregnancy</li> <li>• Misdiagnosis</li> <li>• No bed space</li> <li>• No relative to care for them during treatment</li> <li>• Not healthy enough to continue treatment</li> <li>• Patients changing mobile numbers so cannot be contacted for further management</li> <li>• Paying out of pocket expenses</li> <li>• Poor collaboration amongst health care workers</li> <li>• Poor nutrition</li> <li>• Poorly trained staff</li> <li>• Power outages</li> <li>• Pre-referral diagnosis not communicated</li> <li>• Preference for alternative therapies (herbal, Chinese, acupuncture, food supplements) <ul style="list-style-type: none"> <li>• Preference to observe</li> <li>• Surgeon/operating room unavailability</li> <li>• Unavailability of treatment modality</li> <li>• Unwelcoming, demotivated and uncommitted staff turn patients away</li> </ul> </li> </ul> |
|-------------------------------------------------------------------------------------------------------------------------------------------------------------------------------------------------------------------------------------------------------------------------------------------------------------------------------------------------------------------------------------------------------------------------------------------------------------------------------------------------------------------------------------------------------------------------------------------------------------------------------------------------------------------------------------------------------------------------------------------------------------------------------------------------------------------------------------------------------------------------------------------------------------------------------------------------------------------------------------------------------------------------------------------------------|--|------------------------------------------------------------------------------------------------------------------------------------------------------------------------------------------------------------------------------------------------------------------------------------------------------------------------------------------------------------------------------------------------------------------------------------------------------------------------------------------------------------------------------------------------------------------------------------------------------------------------------------------------------------------------------------------------------------------------------------------------------------------------------------------------------------------------------------------------------------------------------------------------------------------------------------------------------------------------------------------------------------------------------------------------------------------------------------------------------------------------|

### **Seeking delay**

Reasons for delays in seeking care included a lack of awareness about cancer and low health literacy which manifested itself as fears, false perceptions and beliefs and embarrassment about cancer.<sup>23,25,28,29,32,34,35,37,39,39,41,48,52,55,57,61,62,64,67,68,70,74,75</sup> There was also a preference for seeking treatment from traditional or faith-based healers.<sup>24,27,29,32-35,39,41,43,45,46,48,52,54,55,62,67,68,74,75</sup> Participants in the various studies recounted the belief they had not been sick enough or didn't have adequate money to justify abandoning their obligations (both financial and social)<sup>23,24,26,28,34,35,39,42,48,49,52,53,55,69,74,75</sup>; they rather reassured themselves about the seriousness of symptoms (for example lumps) as the symptoms did not cause disability or pain in the early stages of disease and that it was self-limiting.<sup>23,28,33-35,39,41,44,48,50,64,70,75</sup> Additionally, not knowing where or how to enter the health system for symptoms before they cause life threatening conditions contributed to delays in seeking treatment.<sup>28,34,41,43</sup> The unknown costs of managing cancer was also noted to intimidate patients and delay presentation as a result.<sup>23,41</sup>

### **Reaching care**

The physical distance to appropriate care was cited as a major barrier for patients who have to take into consideration transport costs to specialist facilities, accommodation and subsistence costs.<sup>20,24-26,29,30,34,37-39,44,47-49,52,53,57,59,68-70,74,75</sup> Even when transport is made available, they carry the cost of being away from their jobs and families. Other than geographical distance, low levels of cancer care knowledge amongst primary level healthcare staff was also a barrier to the referral of patients.<sup>28,34,42,67,71,75</sup> This was identified as a source of misdiagnosis and underlay the lack of recognition for the urgency of transferring care to tertiary institutions. In one study, participants reported that they had been misinformed at the primary level that their condition was incurable.

### **Receiving quality care**

The paucity of infrastructure, equipment, medication, and human resources needed for cancer care underpinned the barriers to receiving quality cancer care.<sup>25,59,66</sup> Other factors included demotivated and burnt-out staff and the lack of specialist training of staff in cancer.<sup>22,25,28,29,35,53,59</sup> Tensions and mistrust of the system as a whole between the patients and healthcare providers operating in constrained environments were reported as contributing factors that drove patients to alternate medicine or even simply abandon treatment.<sup>28,44,49</sup> In addition, the lack of availability of essential resources lead to high prices and catastrophic out of pocket expenses for the patients.<sup>20,26,28,29,33,39,44,46,49,52,53,58,59,73,74</sup>

### **Discussion**

The impact of delays in the cancer care pathway on persistent high mortality rates are well recognized. Sub Saharan African countries are called upon to accelerate the establishment and implementation of their cancer control plans and it is pertinent to recognize that whilst respecting the unique aspects of each nation, utilization of a common knowledge base avoids duplication and allows for prudent efficient use of scarce resources.<sup>2,13</sup> In this regard, results from research using a robust methodological approach provides a foundation for common knowledge that is applicable broadly.<sup>14</sup>

### **Interpretation**

Our systematic review of studies in Sub-Saharan Africa investigating the barriers to access to cancer care demonstrates a very limited number of studies despite the importance of this subject area, with heterogeneity in study design which limits their translational impact. The publications we found were clustered in the Northern and West African regions and given the heterogenous factors influencing the SSA region data cannot reliably be extrapolated across the continent. In addition, 70% of the studies focused on breast and cervical cancer with major causes of cancer related mortality and morbidity such as prostate and esophageal cancer not addressed which is of major concern. The results highlight the need for a coordinated approach to managing these evidence gaps with no studies addressing the barriers to diagnosis and treatment of cancer identified in 35 of 48 countries in SSA.

The capacity to conduct robust research is increasingly possible across countries in SSA but it requires considerable efforts to coordinate these resources to support a common agenda based on country and regional level priorities.<sup>76,77</sup> Presently, a discordance between research needs and research funding priorities across the continent has been accelerated by the synthetic external agendas in individual countries rather than supporting endogenous solutions driven by those experiencing the problems.<sup>78,79</sup>

Most published data have been obtained through cross sectional surveys, which detail the prevalence of reasons for delays but fail to provide sufficient insights into the underlying factors and system level processes to enable the identification of interventions. Nonetheless they still provide a valuable baseline that we integrated into a "Three delays" model.

The common roots of the reasons for delays at each level of seeking, reaching, and receiving quality care as listed in Table 2. are firstly fear (apprehension or mistrust) and secondly, a lack of resources (financial, human, or infrastructure). Across all delays, cost is a major factor that influences the interval between the stages in the cancer pathway. Out of pocket expenses are high with patients requiring cover for transport, accommodation, diagnostic tests, and medicines. A significant number of patients live under the poverty line and it may seem unrealistic for the families to spend on what is perceived to be an incurable disease in the first instance.<sup>80</sup> A recent study demonstrated the threat of catastrophic health expenditure that accompanies a cancer diagnosis even with the basic drugs in Low and Middle Income Countries (LMICs).<sup>81</sup>

In seeking care, fear is compounded by the lack of awareness (knowledge) of the disease, availability of services, or how to navigate the pathways to quality healthcare. It can drive patients to rely on familiar systems of alternative medicines (traditional healers, 'Chinese' medicine, Faith based healers). In addition to these challenges taking time off from work or domestic obligations to attend healthcare, appointments is often relegated in terms of priorities due to financial and social implications. Societal expectations also create fear of stigmatism and promote secrecy that hinders free information flow between those seeking it and its custodians.

For reaching care the lack of adequate coordination of services was the dominant theme. Poorly trained staff or lack of support for primary health care practitioners delayed referrals to more specialized services and the health system in such a scenario could discourage

1  
2  
3 patients on the curability of the condition. Links and relationships are essential between  
4 primary and secondary/tertiary healthcare as most patients will present first to local clinics  
5 or health posts. This is particularly important where systems are not electronically linked for  
6 results to be easily attainable between practitioners.  
7  
8

9 To receive quality care, patients need access to a health care system with appropriate human  
10 resources and infrastructure (diagnostic and treatment). A lack of human resources  
11 encompasses both the competence of the workforce for tertiary services as well as the actual  
12 low numerical value of specialized knowledgeable staff leading to burnout. Equally a skilled  
13 and competent workforce without appropriate infrastructure or sufficient medication and  
14 surgical supplies cannot be expected to deliver quality care. Another aspect to consider for  
15 receiving quality care includes patient factors like good nutritional status, financial capacity,  
16 and social capital to undergo treatment.  
17  
18

19  
20 The findings from our study suggest that reasons for delays are interlinked both at an  
21 individual level and population level (Figure 1). An individual with vulnerabilities at the  
22 seeking level phase would most likely experience repetitive barriers in reaching care as well  
23 as receiving quality care. An underdeveloped health system with poor linkages between  
24 primary health care and tertiary level care will inevitably have a large proportion of patients  
25 falling through the cracks between phases of care. This could be due to untimely referrals  
26 and the inability to support diagnostic costs thereby relying on the patient to raise funds.  
27  
28

29  
30 To see a reduction in cancer mortality in Sub Saharan Africa health systems need to address  
31 delays within the cancer pathway from initial presentation and appraisal to completion of  
32 treatment and managing follow up and the survivorship pathway. Holistic support for the  
33 patient as well as the workforce across the continuum and longitudinally in each phase is  
34 important to achieve good outcomes. Cognizance of the multiple barriers present for  
35 individual patients from developing a cancer to its treatment is important for policy makers  
36 and experts to build resilient and effective cancer control programs. With an individual in  
37 mind, an effective population approach can be achieved.  
38  
39

#### 40 41 ***Limitations of this systematic review***

42 This systematic review only captured literature in the English language. This means data and  
43 experiences of French, Portuguese and Spanish speaking SSA were excluded based on  
44 language. The survey and retrospective design of most of the studies introduced the inherent  
45 biases of these methodologies.  
46  
47

#### 48 49 ***Implications for policy in SSA***

50 Due to the paucity of organized data in SSA, the starting point of research is often  
51 extrapolated from other regions that have different realities. In carrying out this systematic  
52 review we provide an organized pool of information that will provide a robust resource for  
53 other researchers seeking to conduct studies in SSA.  
54  
55  
56  
57  
58  
59  
60



**Funding**

This work was supported by the London School of Hygiene and Tropical Medicine's Wellcome Institutional Strategic Support Fund (grant reference 204928/Z/16/Z)

**Notes***Role of the funder*

The funder had no role in the design and conduct of the systematic review, analysis of data; preparation, review and approval of the manuscript for publication

*Author disclosures*

The authors have no potential conflicts of interest

*Author contributions*

Conceptualization: DCL, AA; Data curation: DCL, MM, AA; Formal Analysis: DCL, AA, MM, SM; Funding acquisition: AA; Investigation: DCL, MM, AA; Methodology: DCL, AA; Project administration: AA; Resources: DCL, AA; Supervision: DCL, AA; Validation: DCL, AA, MM; Visualization: DCL; Writing- original draft DCL, SM, MM, GB, MS, RM, ASS, JS, ADM, AA; Writing – review and editing DCL, SM, MM, GB, MS, RM, ASS, JS, ADM, AA

*Disclaimers*

No disclaimers

*Prior presentations*

No prior presentations

**Data availability**

All data is available in the Covidence app and access can be shared on request.

**Ethics approval**

Not applicable

## References

1. 58th World Health Assembly. WHA58.22 Cancer Prevention and Control. Published online May 25, 2005.
2. 70th World Health Assembly. WHA70.12 Cancer Prevention and Control in the context of an integrated approach. Published online May 31, 2017.
3. GLOBOCAN. Sub-Saharan Africa Hub Source: Globocan 2020 Cancer Statistics. Published online 2020. Accessed April 10, 2022. <https://gco.iarc.fr/today/data/factsheets/populations/971-sub-saharan-africa-hub-fact-sheets.pdf>
4. Azevedo MJ. The State of Health System(s) in Africa: Challenges and Opportunities. In: *Historical Perspectives on the State of Health and Health Systems in Africa, Volume II*. Springer International Publishing; 2017:1-73. doi:10.1007/978-3-319-32564-4\_1
5. Ifeagwu SC, Yang JC, Parkes-Ratanshi R, Brayne C. Health financing for universal health coverage in Sub-Saharan Africa: a systematic review. *Glob Health Res Policy*. 2021;6(1):8. doi:10.1186/s41256-021-00190-7
6. Asante A, Wasike WSK, Ataguba JE. Health Financing in Sub-Saharan Africa: From Analytical Frameworks to Empirical Evaluation. *Appl Health Econ Health Policy*. 2020;18(6):743-746. doi:10.1007/s40258-020-00618-0
7. Oleribe OE, Momoh J, Uzochukwu BS, et al. Identifying Key Challenges Facing Healthcare Systems In Africa And Potential Solutions. *Int J Gen Med*. 2019;Volume 12:395-403. doi:10.2147/IJGM.S223882
8. Zeltner T, Riahi F, Huber J. Acute and Chronic Health Challenges in Sub-Saharan Africa: An Unfinished Agenda. In: Groth H, May JF, eds. *Africa's Population: In Search of a Demographic Dividend*. Springer International Publishing; 2017:283-297. doi:10.1007/978-3-319-46889-1\_18
9. World Health Organisation, Geneva. WHO report on cancer: setting priorities, investing wisely and providing care for all. Published online 2020.
10. Khan MS, Meghani A, Liverani M, Roychowdhury I, Parkhurst J. How do external donors influence national health policy processes? Experiences of domestic policy actors in Cambodia and Pakistan. *Health Policy Plan*. 2018;33(2):215-223. doi:10.1093/heapol/czx145
11. Ollila E. Global Health Priorities - priorities of the wealthy? *Glob Health*. 2005;1(1):6. doi:10.1186/1744-8603-1-6
12. Romero Y, Trapani D, Johnson S, et al. National cancer control plans: a global analysis. *Lancet Oncol*. 2018;19(10):e546-e555. doi:10.1016/S1470-2045(18)30681-8

13. World Health Organisation. National Cancer Control Programmes. Policies and managerial guidelines. 2nd Edition. Published online 2002.
14. Walter F, Webster A, Scott S, Emery J. The Andersen Model of Total Patient Delay: A Systematic Review of Its Application in Cancer Diagnosis. *J Health Serv Res Policy*. 2012;17(2):110-118. doi:10.1258/jhsrp.2011.010113
15. Shah B, Krishnan N, Kodish SR, et al. Applying the Three Delays Model to understand emergency care seeking and delivery in rural Bangladesh: a qualitative study. *BMJ Open*. 2020;10(12):e042690. doi:10.1136/bmjopen-2020-042690
16. Serbanescu F, Goodwin MM, Binzen S, et al. Addressing the First Delay in Saving Mothers, Giving Life Districts in Uganda and Zambia: Approaches and Results for Increasing Demand for Facility Delivery Services. *Glob Health Sci Pract*. 2019;7(Supplement 1):S48-S67. doi:10.9745/GHSP-D-18-00343
17. Thaddeus S, Maine D. Too far to walk: Maternal mortality in context. *Soc Sci Med*. 1994;38(8):1091-1110. doi:10.1016/0277-9536(94)90226-7
18. Covidence. Covidence. <https://app.covidence.org>
19. Hoy D, Brooks P, Woolf A, et al. Assessing risk of bias in prevalence studies: modification of an existing tool and evidence of interrater agreement. *J Clin Epidemiol*. 2012;65(9):934-939. doi:10.1016/j.jclinepi.2011.11.014
20. Anyanwu SN, Egwuonwu OA, Ihekwoaba EC. Acceptance and adherence to treatment among breast cancer patients in Eastern Nigeria. *Breast*. 2011;20 Suppl 2:S51-3. doi:10.1016/j.breast.2011.01.009
21. Herbst CL, Miot JK, Moch SL, Ruff P. Access to colorectal cancer (CRC) chemotherapy and the associated costs in a South African public healthcare patient cohort. *J Cancer Policy*. 2018;15((Herbst C.-L., candicelee.herbst@gmail.com; Miot J.K., Jacqui.Miot@wits.ac.za; Moch S.L., Shirra.Moch@wits.ac.za) Division of Pharmacology, Department of Pharmacy and Pharmacology, Faculty of Health Sciences, University of the Witwatersrand, 7 York Road,):18-24. doi:10.1016/j.jcpc.2017.11.005
22. Reibold CF, Tariku W, Eber-Schulz P, et al. Adherence to Newly Implemented Tamoxifen Therapy for Breast Cancer Patients in Rural Western Ethiopia. *Breast Care*. 2021;((Reibold C.F.; Eber-Schulz P.; Vetter M.; Thomssen C.; Kantelhardt E.J., eva.kantelhardt@uk-halle.de) Department of Gynecology, Martin-Luther-University Halle-Wittenberg, Halle (Saale), Germany(Tariku W.) Ethiopian Evangelical Church of Mekane Yesus EECMY). doi:10.1159/000512840
23. Joffe M, Ayeni O, Norris SA, et al. Barriers to early presentation of breast cancer among women in Soweto, South Africa. *PLoS ONE*. 2018;13(2). doi:10.1371/journal.pone.0192071

- 1  
2  
3 24. Schleimer LE, Vianney Dusengimana JM, Butonzi J, et al. Barriers to timely surgery for  
4 breast cancer in Rwanda. *Surg U S*. 2019;166(6):1188-1195.  
5 doi:10.1016/j.surg.2019.06.021  
6  
7
- 8 25. Martin AN, Kaneza KM, Kulkarni A, et al. Cancer Control at the District Hospital Level in  
9 Sub-Saharan Africa: An Educational and Resource Needs Assessment of General  
10 Practitioners. *J Glob Oncol*. 2019;5:1-8. doi:10.1200/JGO.18.00126  
11
- 12 26. Nakaganda A, Solt K, Kwagonza L, Driscoll D, Kampi R, Orem J. Challenges faced by  
13 cancer patients in Uganda: Implications for health systems strengthening in resource  
14 limited settings. *J Cancer Policy*. 2021;27((Nakaganda A., annet.nakaganda@uci.or.ug;  
15 Kampi R.; Orem J.) Uganda Cancer Institute, P. O Box 3935, Kampala, Uganda(Solt K.;  
16 Driscoll D.) American Cancer Society, 250 Williams St., Atlanta, GA, United  
17 States(Kwagonza L.) Ministry of Health, Uganda, P.O B).  
18 doi:10.1016/j.jcpc.2020.100263  
19  
20
- 21 27. Ajah L, Ezeome IV, Umeh UA, Aniebue UU, Nwankwo TO. Complementary and  
22 alternative medicine. Use and challenges among gynaecological cancer patients in  
23 Nigeria: Experiences in a tertiary health institution - Preliminary results. *Eur J Gynaecol*  
24 *Oncol*. 2019;40(1):101-105. doi:10.12892/ejgo4429.2019  
25  
26
- 27 28. Mapanga W, Norris SA, Chen WC, et al. Consensus study on the health system and  
28 patient-related barriers for lung cancer management in South Africa. *PLoS ONE*.  
29 2021;16(2 February). doi:10.1371/journal.pone.0246716  
30  
31
- 32 29. Oladeji A, Atalabi O, Jimoh M, Ntekim I, Elumelu T. Delay in presentation of cancer  
33 patients for diagnosis and management: An institutional report. *Internet J Oncol*.  
34 2017;13(1). doi:10.5580/IJO.44745  
35  
36
- 37 30. Rayne S, Schnippel K, Kruger D, Benn CA, Firnhaber C. Delay to diagnosis and breast  
38 cancer stage in an urban south african breast clinic. *S Afr Med J*. 2019;109(3):159-163.  
39 doi:10.7196/SAMJ.2019.v109i3.13283  
40  
41
- 42 31. Gebremariam A, Assefa M, Addissie A, et al. Delayed initiation of adjuvant  
43 chemotherapy among women with breast cancer in Addis Ababa, Ethiopia. *Breast*  
44 *Cancer Res Treat*. 2021;((Gebremariam A., alemg25@gmail.com) Department of Public  
45 Health, College of Medicine and Health Sciences, Adigrat University, Tigray, Adigrat,  
46 Ethiopia(Gebremariam A., alemg25@gmail.com; Addissie A.; Worku A.; Dereje N.)  
47 Department of Preventive Medicine,). doi:10.1007/s10549-021-06131-9  
48  
49
- 50 32. Otieno ES, Micheni JN, Kimende SK, Mutai KK. Delayed presentation of breast cancer  
51 patients. *East Afr Med J*. 2010;87(4):147-150. doi:10.4314/eamj.v87i4.62410  
52  
53
- 54 33. Ukwenya AY, Yusufu LMD, Nmadu PT, Garba ES, Ahmed A. Delayed treatment of  
55 symptomatic breast cancer: The experience from Kaduna, Nigeria. *S Afr J Surg*.  
56 2008;46(4):106-111.  
57 [https://www.embase.com/search/results?subaction=viewrecord&id=L352683097&fro](https://www.embase.com/search/results?subaction=viewrecord&id=L352683097&from=export)  
58 [m=export](https://www.embase.com/search/results?subaction=viewrecord&id=L352683097&from=export)  
59  
60

- 1  
2  
3  
4  
5  
6  
7  
8  
9  
10  
11  
12  
13  
14  
15  
16  
17  
18  
19  
20  
21  
22  
23  
24  
25  
26  
27  
28  
29  
30  
31  
32  
33  
34  
35  
36  
37  
38  
39  
40  
41  
42  
43  
44  
45  
46  
47  
48  
49  
50  
51  
52  
53  
54  
55  
56  
57  
58  
59  
60
34. Pace LE, Mpunga T, Hategekimana V, et al. Delays in breast cancer presentation and diagnosis at two rural cancer referral centers in Rwanda. *Oncologist*. 2015;20(7):780-788. doi:10.1634/theoncologist.2014-0493
  35. Ezeome ER. Delays in presentation and treatment of breast cancer in Enugu, Nigeria. *Niger J Clin Pract*. 2010;13(3):311-316. <https://www.embase.com/search/results?subaction=viewrecord&id=L359540342&from=export>
  36. Jedy-Agba E, McCormack V, Olaomi O, et al. Determinants of stage at diagnosis of breast cancer in Nigerian women: sociodemographic, breast cancer awareness, health care access and clinical factors. *Cancer Causes Control*. 2017;28(7):685-697. doi:10.1007/s10552-017-0894-y
  37. Foerster M, McKenzie F, Zietsman A, et al. Dissecting the journey to breast cancer diagnosis in sub-Saharan Africa: Findings from the multicountry ABC-DO cohort study. *Int J Cancer*. 2021;148(2):340-351. doi:10.1002/ijc.33209
  38. Yang K, Msami K, Calixte R, Mwaiselage J, Dorn J, Soliman AS. Educational Opportunities for Down-Staging Breast Cancer in Low-Income Countries: an Example from Tanzania. *J Cancer Educ Off J Am Assoc Cancer Educ*. 2019;34(6):1225-1230. doi:10.1007/s13187-019-01587-2
  39. Olarewaju SO, Oyekunle EO, Bamiro AO. Effect of sociodemographic variables on patient and diagnostic delay of breast cancer at the foremost health care institution in Nigeria. *J Glob Oncol*. 2019;2019(5). doi:10.1200/JGO.19.00108
  40. Low DH, Phipps W, Orem J, Casper C, Bender Ignacio RA. Engagement in HIV Care and Access to Cancer Treatment Among Patients With HIV-Associated Malignancies in Uganda. *J Glob Oncol*. 2019;5:1-8. doi:10.1200/JGO.18.00187
  41. Dereje N, Addissie A, Worku A, et al. Extent and predictors of delays in diagnosis of cervical cancer in Addis Ababa, Ethiopia: A population-based prospective study. *J Glob Oncol*. 2020;6((Dereje N., neba.jahovy@gmail.com) School of Public Health, Wachemo University, Hosanna, Ethiopia(Dereje N., jahovy@gmail.com; Addissie A.; Worku A.) Department of Preventive Medicine, School of Public Health, Addis Ababa University, Addis Ababa, Eth):277-284. doi:10.1200/JGO.19.00242
  42. Dereje N, Gebremariam A, Addissie A, et al. Factors associated with advanced stage at diagnosis of cervical cancer in Addis Ababa, Ethiopia: A population-based study. *BMJ Open*. 2020;10(10). doi:10.1136/bmjopen-2020-040645
  43. Zeleke S, Anley M, Kefale D, Wassihun B. Factors associated with delayed diagnosis of cervical cancer in tikur anbesa specialized hospital, Ethiopia, 2019: Cross-sectional study. *Cancer Manag Res*. 2021;13((Zeleke S., shegawzn@gmail.com; Kefale D.) Department of Nursing, College of Health Sciences, Debre Tabor University, Debre Tabor, Ethiopia(Anley M.) Department of Oncology Nursing, Tikur Anbesa Specialized Hospital, Addis Ababa, Ethiopia(Wassihun B.) Dep):579-585. doi:10.2147/CMAR.S285621

- 1  
2  
3  
4  
5  
6  
7  
8  
9  
10  
11  
12  
13  
14  
15  
16  
17  
18  
19  
20  
21  
22  
23  
24  
25  
26  
27  
28  
29  
30  
31  
32  
33  
34  
35  
36  
37  
38  
39  
40  
41  
42  
43  
44  
45  
46  
47  
48  
49  
50  
51  
52  
53  
54  
55  
56  
57  
58  
59  
60
44. Long C, Titus Ngwa Tagang E, Popat RA, Lawong EK, Brown JA, Wren SM. Factors associated with delays to surgical presentation in North-West Cameroon. *Surg U S*. 2015;158(3):756-763. doi:10.1016/j.surg.2015.04.016
  45. Brinton L, Figueroa J, Adjei E, et al. Factors contributing to delays in diagnosis of breast cancers in Ghana, West Africa. *Breast Cancer Res Treat*. 2017;162(1):105-114. doi:10.1007/s10549-016-4088-1
  46. Fasunla AJ, Ogunkeyede SA. Factors contributing to poor management outcome of sinonasal malignancies in South-west Nigeria. *Ghana Med J*. 2013;47(1):10-15. <https://www.embase.com/search/results?subaction=viewrecord&id=L563019178&from=export>
  47. Anakwenze C, Bhatia R, Rate W, et al. Factors related to advanced stage of cancer presentation in Botswana. *J Glob Oncol*. 2018;2018(4). doi:10.1200/JGO.18.00129
  48. Čačala SR, Gilart J. Factors relating to late presentation of patients with breast cancer in area 2 KwaZulu-Natal, South Africa. *J Glob Oncol*. 2017;3(5):497-501. doi:10.1200/JGO.2016.008060
  49. Subramanian S, Gakunga R, Jones M, et al. Financial barriers related to breast cancer screening and treatment: A cross-sectional survey of women in Kenya. *J Cancer Policy*. 2019;22((Subramanian S., ssubramanian@rti.org; Jones M., madeleinejones@rti.org) RTI International, Nairobi, United States(Gakunga R., robaigakunga@yahoo.com) Independent Research Scientist, Nairobi, Kenya(Kinyanjui A., asaphkinyanjui@kehpc.org; Gikaara N., ngik). doi:10.1016/j.jcpo.2019.100206
  50. Moodley J, Cairncross L, Naiker T, Constant D. From symptom discovery to treatment - women's pathways to breast cancer care: A cross-sectional study. *BMC Cancer*. 2018;18(1). doi:10.1186/s12885-018-4219-7
  51. Knapp GC, Tansley G, Olasehinde O, et al. Geospatial access predicts cancer stage at presentation and outcomes for patients with breast cancer in southwest Nigeria: A population-based study. *Cancer*. 2020;((Knapp G.C., knappg@pm.me) Department of Surgery, Division of General Surgery, Dalhousie University, Halifax, NS, Canada(Tansley G.) Department of Medicine, Division of Critical Care, University of British Columbia, Vancouver, BC, Canada(Olasehinde O.; Wu). doi:10.1002/cncr.33394
  52. Togawa K, Anderson BO, Foerster M, et al. Geospatial barriers to healthcare access for breast cancer diagnosis in sub-Saharan African settings: The African Breast Cancer—Disparities in Outcomes Cohort Study. *Int J Cancer*. 2020;((Togawa K., togawak@iarc.fr; Foerster M.; McKenzie F.; Schüz J.; McCormack V.) Section of Environment and Radiation, International Agency for Research on Cancer, Lyon, France(Anderson B.O.) Division of Public Health Sciences, Fred Hutchinson Cancer Resear). doi:10.1002/ijc.33400
  53. Tapera O, Dreyer G, Kadzatsa W, Nyakabau AM, Stray-Pedersen B, Sjh H. Health system constraints affecting treatment and care among women with cervical cancer in Harare, Zimbabwe. *BMC Health Serv Res*. 2019;19(1):829. doi:10.1186/s12913-019-4697-6

- 1  
2  
3  
4  
5  
6  
7  
8  
9  
10  
11  
12  
13  
14  
15  
16  
17  
18  
19  
20  
21  
22  
23  
24  
25  
26  
27  
28  
29  
30  
31  
32  
33  
34  
35  
36  
37  
38  
39  
40  
41  
42  
43  
44  
45  
46  
47  
48  
49  
50  
51  
52  
53  
54  
55  
56  
57  
58  
59  
60
54. Grosse Frie K, Kamaté B, Traoré CB, Coulibaly B, Mallé B, Kantelhardt EJ. Health system organisation and patient pathways: breast care patients' trajectories and medical doctors' practice in Mali. *BMC Public Health*. 2019;19(1):204. doi:10.1186/s12889-019-6532-8
  55. Alatise OI, Fischer SE, Ayandipo OO, Omisore AG, Olatoke SA, Kingham TP. Health-seeking behavior and barriers to care in patients with rectal bleeding in Nigeria. *J Glob Oncol*. 2017;3(6):749-756. doi:10.1200/JGO.2016.006601
  56. Martei YM, Grover S, Bilker WB, et al. Impact of Essential Medicine Stock Outs on Cancer Therapy Delivery in a Resource-Limited Setting. *J Glob Oncol*. 2019;5:1-11. doi:10.1200/JGO.18.00230
  57. Agodirin O, Olatoke S, Rahman G, et al. Impact of Primary Care Delay on Progression of Breast Cancer in a Black African Population: A Multicentered Survey. *J Cancer Epidemiol*. 2019;2019((Agodirin O., cancer1992@yahoo.com; Olatoke S., samuelolatoke@yahoo.co.uk; Agboola J., owoade14@gmail.com) Department of Surgery, University of Ilorin, University of Ilorin Teaching Hospital, Nigeria(Rahman G., garahman1@yahoo.com) Department of Surgery,). doi:10.1155/2019/2407138
  58. Foerster M, Anderson BO, McKenzie F, et al. Inequities in breast cancer treatment in sub-Saharan Africa: Findings from a prospective multi-country observational study. *Breast Cancer Res*. 2019;21(1). doi:10.1186/s13058-019-1174-4
  59. Leng J, Ntekim AI, Ibraheem A, Anakwenze CP, Golden DW, Olopade OI. Infrastructural challenges lead to delay of curative radiotherapy in Nigeria. *J Glob Oncol*. 2020;6((Leng J.) University of Chicago, Pritzker School of Medicine, Chicago, IL, United States(Ntekim A.I.) Department of Radiation Oncology, College of Medicine, University of Ibadan, Ibadan, Nigeria(Ibraheem A.) Department of Medicine, University of Chicago,):269-276. doi:10.1200/JGO.19.00286
  60. Tesfaw A, Getachew S, Addissie A, et al. Late-Stage Diagnosis and Associated Factors Among Breast Cancer Patients in South and Southwest Ethiopia: A Multicenter Study. *Clin Breast Cancer*. 2021;21(1):e112-e119. doi:10.1016/j.clbc.2020.08.011
  61. Mlange R, Matovelo D, Rambau P, Kidenya B. Patient and disease characteristics associated with late tumour stage at presentation of cervical cancer in northwestern Tanzania. *BMC Womens Health*. 2016;16(1). doi:10.1186/s12905-016-0285-7
  62. Tesfaw A, Demis S, Munye T, Ashuro Z. Patient delay and contributing factors among breast cancer patients at two cancer referral centres in Ethiopia: A cross-sectional study. *J Multidiscip Healthc*. 2020;13((Tesfaw A., aragetesfa05@gmail.com) Department of Public Health, Debre Tabor University, College of Health Sciences, Debre Tabor, Ethiopia(Demis S.) Department of Pediatrics and neonatal Nursing, Debre Tabor University, College of Health Sciences, Debre T):1391-1401. doi:10.2147/JMDH.S275157

- 1  
2  
3 63. Page CM, Ibrahim S, Park LP, Huchko MJ. Patient factors affecting successful linkage to  
4 treatment in a cervical cancer prevention program in Kenya: A prospective cohort  
5 study. *PLoS ONE*. 2019;14(9). doi:10.1371/journal.pone.0222750  
6  
7
- 8 64. Bhatia RK, Rayne S, Rate W, et al. Patient Factors Associated With Delays in Obtaining  
9 Cancer Care in Botswana. *J Glob Oncol*. 2018;4:1-13. doi:10.1200/JGO.18.00088  
10
- 11 65. Ibrahim A, Rasch V, Pukkala E, Aro AR. Predictors of cervical cancer being at an  
12 advanced stage at diagnosis in Sudan. *Int J Womens Health*. 2011;3(1):385-389.  
13 doi:10.2147/ijwh.s21063  
14
- 15 66. Wambalaba FW, Son B, Wambalaba AE, Nyong'o D, Nyong'o A. Prevalence and  
16 Capacity of Cancer Diagnostics and Treatment: A Demand and Supply Survey of Health-  
17 Care Facilities in Kenya. *Cancer Control*. 2019;26(1). doi:10.1177/1073274819886930  
18
- 19 67. Awofeso O, Roberts AA, Salako O, Balogun L, Okediji P. Prevalence and Pattern of Late-  
20 Stage Presentation in Women with Breast and Cervical Cancers in Lagos University  
21 Teaching Hospital, Nigeria. *Niger Med J*. 2018;59(6):74-79.  
22 doi:10.4103/nmj.NMJ\_112\_17  
23
- 24 68. Ntirenganya F, Petroze RT, Kamara TB, et al. Prevalence of breast masses and barriers  
25 to care: Results from a population-based survey in Rwanda and Sierra Leone. *J Surg*  
26 *Oncol*. 2014;110(8):903-906. doi:10.1002/jso.23726  
27
- 28 69. De Boer C, Niyonzima N, Orem J, Bartlett J, Zafar SY. Prognosis and delay of diagnosis  
29 among Kaposi's sarcoma patients in Uganda: A cross-sectional study. *Infect Agent*  
30 *Cancer*. 2014;9(1). doi:10.1186/1750-9378-9-17  
31
- 32 70. Mwaka AD, Garimoi CO, Were EM, Roland M, Wabinga H, Lyratzopoulos G. Social,  
33 demographic and healthcare factors associated with stage at diagnosis of cervical  
34 cancer: cross-sectional study in a tertiary hospital in Northern Uganda. *BMJ Open*.  
35 2016;6(1):e007690. doi:10.1136/bmjopen-2015-007690  
36
- 37 71. Tadesse SK. Socio-economic and cultural vulnerabilities to cervical cancer and  
38 challenges faced by patients attending care at Tikur Anbessa Hospital: A cross sectional  
39 and qualitative study. *BMC Womens Health*. 2015;15(1). doi:10.1186/s12905-015-  
40 0231-0  
41
- 42 72. Dickens C, Joffe M, Jacobson J, et al. Stage at breast cancer diagnosis and distance from  
43 diagnostic hospital in a periurban setting: A South African public hospital case series of  
44 over 1,000 women. *Int J Cancer*. 2014;135(9):2173-2182. doi:10.1002/ijc.28861  
45
- 46 73. Swanson M, Nakalembe M, Chen LM, et al. Surgical candidacy and treatment initiation  
47 among women with cervical cancer at public referral hospitals in Kampala, Uganda: A  
48 descriptive cohort study. *BMJ Open*. 2020;10(12). doi:10.1136/bmjopen-2020-039946  
49
- 50 74. Clegg-Lamprey J, Dakubo J, Attobra YN. Why do breast cancer patients report late or  
51 abscond during treatment in Ghana? A pilot study. *Ghana Med J*. 2009;43(3):127-131.  
52  
53  
54  
55  
56  
57  
58  
59  
60



- 1  
2  
3 75. Agodirin O, Olatoke S, Rahman G, et al. Presentation intervals and the impact of delay  
4 on breast cancer progression in a black African population. *BMC Public Health*.  
5 2020;20(1):962. doi:10.1186/s12889-020-09074-w  
6  
7  
8 76. Nyirenda T, Bockarie M, Machingaidze S, et al. Strengthening capacity for clinical  
9 research in sub-Saharan Africa: partnerships and networks. *Int J Infect Dis*.  
10 2021;110:54-61. doi:10.1016/j.ijid.2021.06.061  
11  
12 77. Graef KM, Okoye I, Ohene Oti NO, Dent J, Odedina FT. Operational Strategies for  
13 Clinical Trials in Africa. *JCO Glob Oncol*. 2020;(6):973-982. doi:10.1200/JGO.19.00204  
14  
15 78. The-Nature-of-and-Motive-for-Academic-Research-in-Higher-Edu.ris.  
16  
17  
18 79. Mutapi F. Africa should set its own research agenda. World view. Published November  
19 26, 2019. Accessed April 10, 2022. [https://www.nature.com/articles/d41586-019-](https://www.nature.com/articles/d41586-019-03627-9)  
20 [03627-9](https://www.nature.com/articles/d41586-019-03627-9)  
21  
22  
23 80. McCormack V, Newton R. Research priorities for social inequalities in cancer in sub-  
24 Saharan Africa. Published online 2019.  
25 <https://www.ncbi.nlm.nih.gov/books/NBK566204>  
26  
27  
28 81. Fundytus A, Sengar M, Lombe D, et al. Access to cancer medicines deemed essential by  
29 oncologists in 82 countries: an international, cross-sectional survey. *Lancet Oncol*.  
30 2021;22(10):1367-1377. doi:10.1016/S1470-2045(21)00463-0  
31  
32  
33  
34  
35  
36  
37  
38  
39  
40  
41  
42  
43  
44  
45  
46  
47  
48  
49  
50  
51  
52  
53  
54  
55  
56  
57  
58  
59  
60

Figure 1. Linkages of 3 delays framework

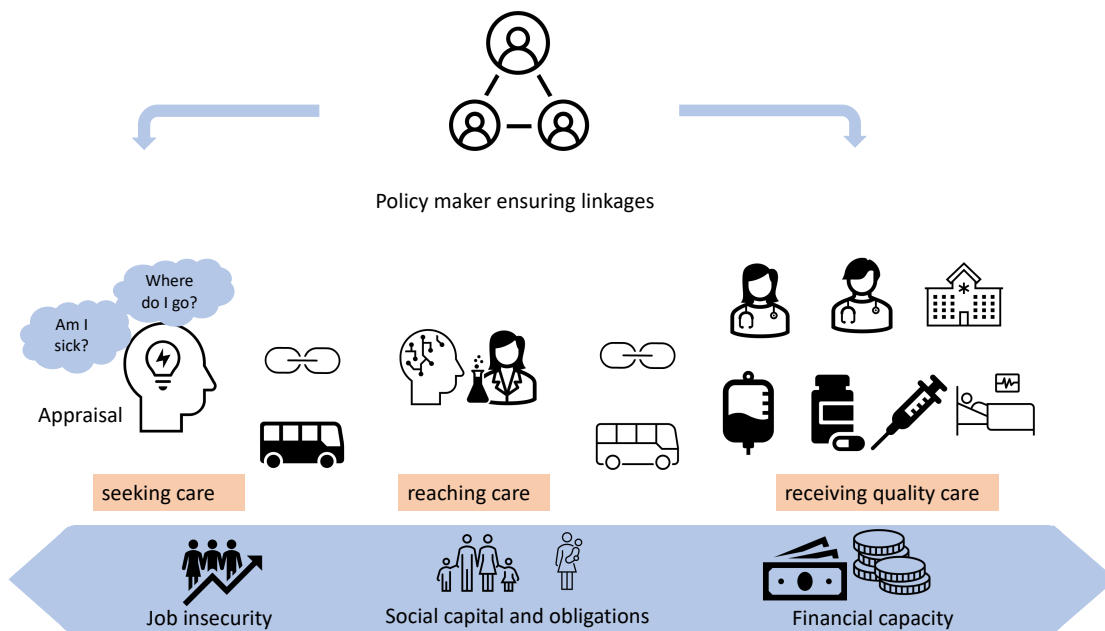

1  
2  
3  
4  
5  
6  
7  
8  
9  
10  
11  
12  
13  
14  
15  
16  
17  
18  
19  
20  
21  
22  
23  
24  
25  
26  
27  
28  
29  
30  
31  
32  
33  
34  
35  
36  
37  
38  
39  
40  
41  
42  
43  
44  
45  
46  
47  
48  
49  
50  
51  
52  
53  
54  
55  
56  
57  
58  
59  
60

For peer review only

Figure 2. Preferred Reporting Items for Systematic Reviews and Meta-Analyses (PRISMA)

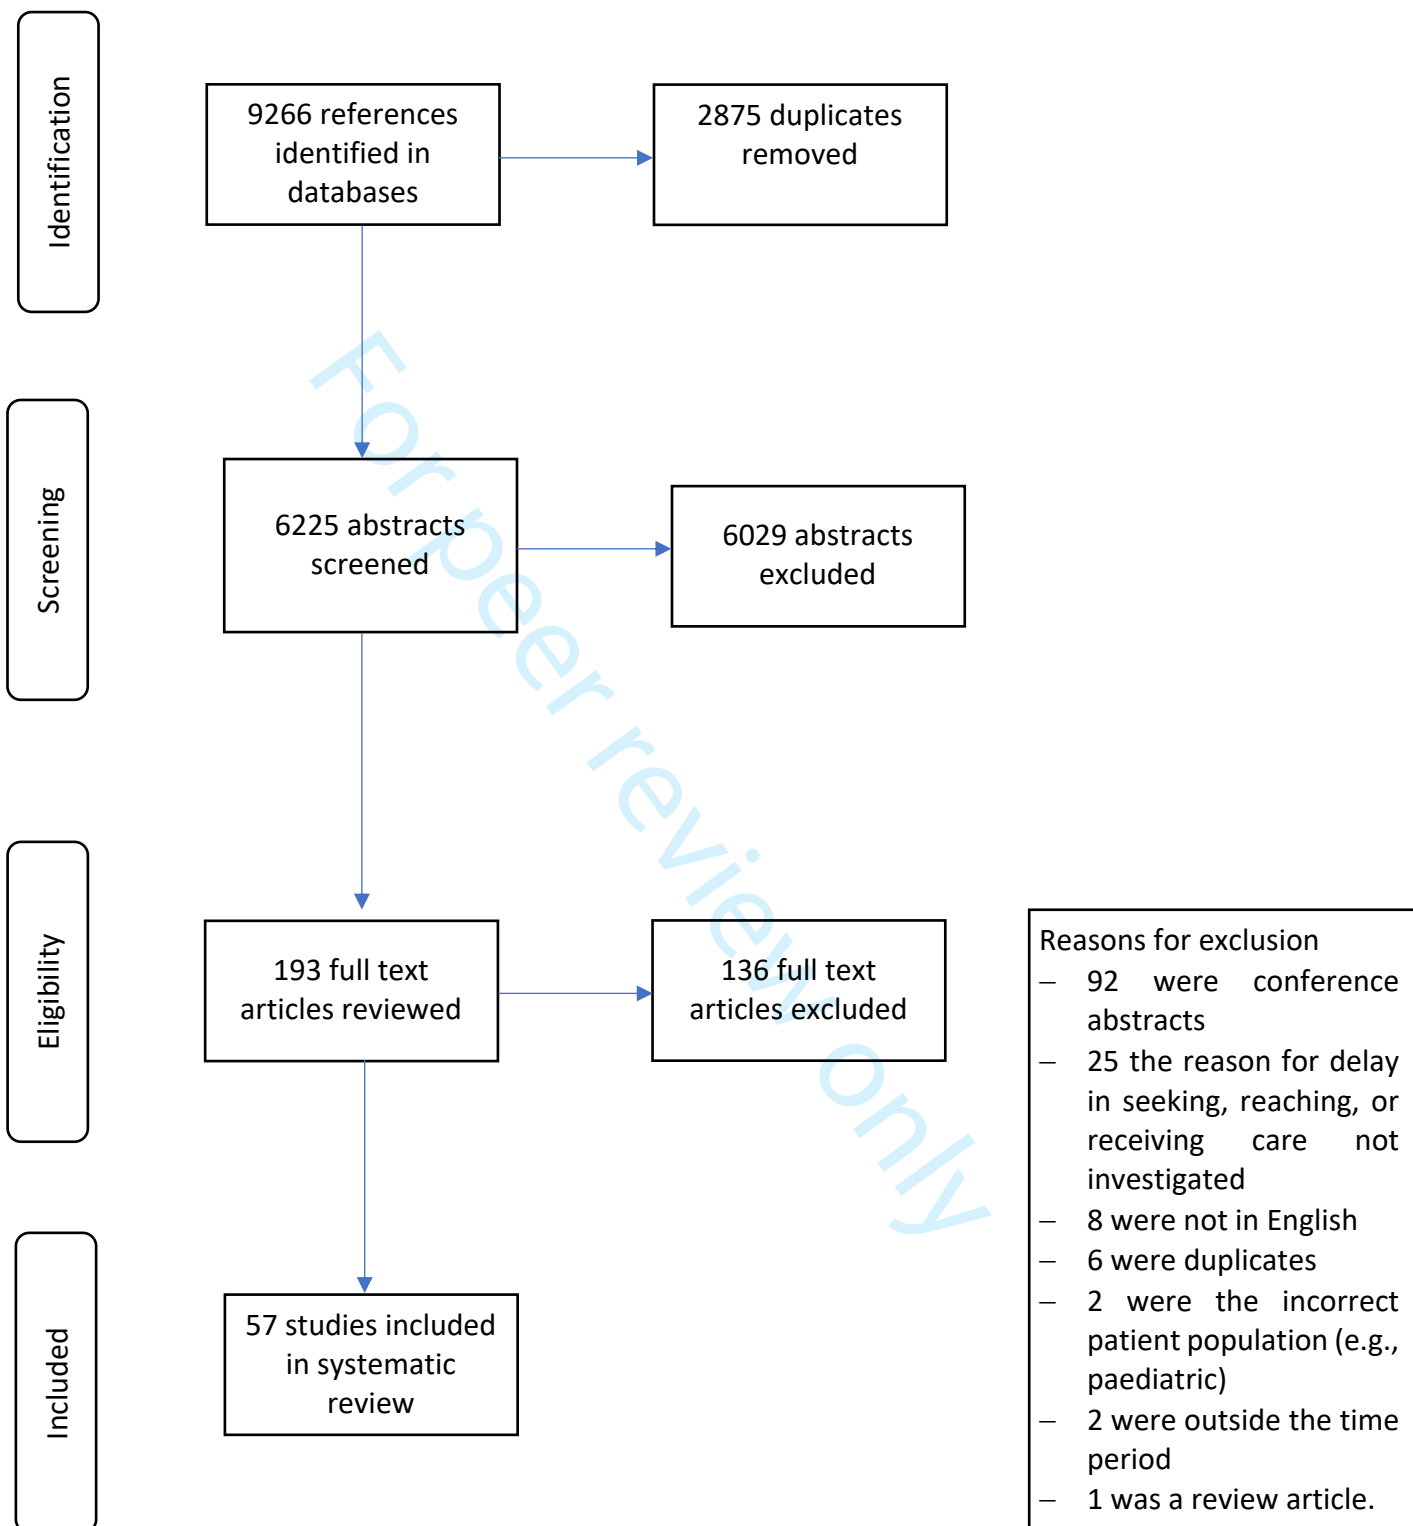

1  
2  
3  
4  
5  
6  
7  
8  
9  
10  
11  
12  
13  
14  
15  
16  
17  
18  
19  
20  
21  
22  
23  
24  
25  
26  
27  
28  
29  
30  
31  
32  
33  
34  
35  
36  
37  
38  
39  
40  
41  
42  
43  
44  
45  
46  
47  
48  
49  
50  
51  
52  
53  
54  
55  
56  
57  
58  
59  
60

For peer review only

Figure 3. Descriptive characteristics of included studies n= 57, categorized according to A (Tumour type); B (Research design); C (Study country (ies)); D (Study setting).

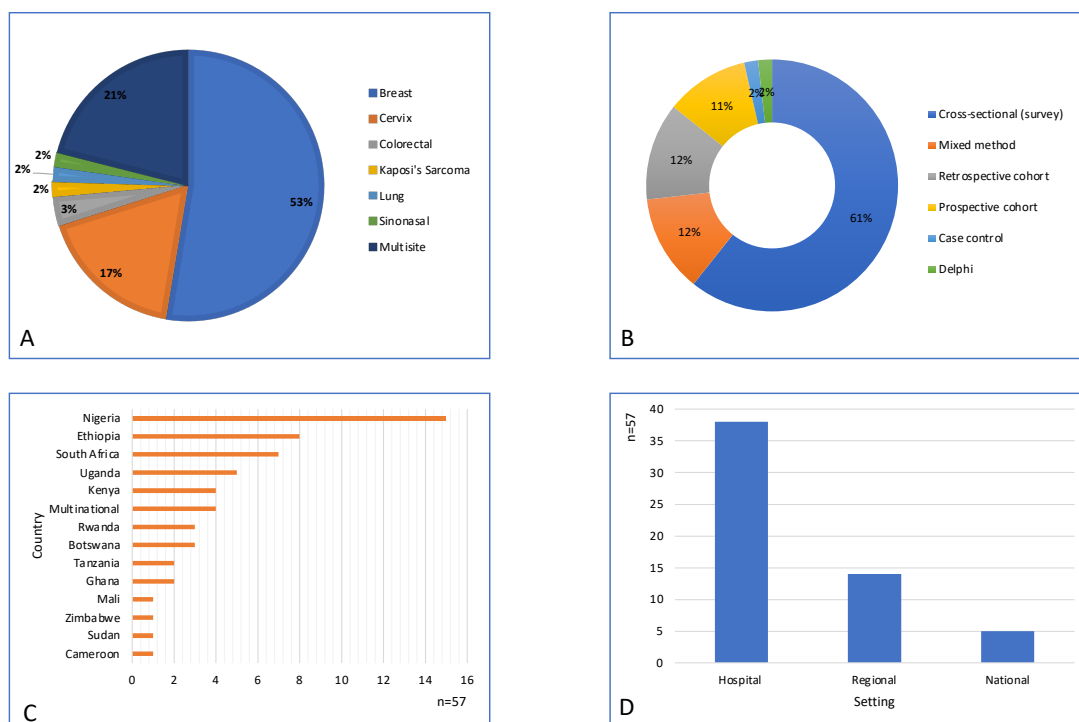

A – Tumour type; B – Research design; C – Country; D - Setting

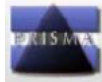

## PRISMA 2020 Checklist

1  
2  
3  
4  
5  
6  
7  
8  
9  
10  
11  
12  
13  
14  
15  
16  
17  
18  
19  
20  
21  
22  
23  
24  
25  
26  
27  
28  
29  
30  
31  
32  
33  
34  
35  
36  
37  
38  
39  
40  
41  
42  
43  
44  
45  
46  
47

| Section and Topic             | Item # | Checklist item                                                                                                                                                                                                                                                                                       | Location where item is reported |
|-------------------------------|--------|------------------------------------------------------------------------------------------------------------------------------------------------------------------------------------------------------------------------------------------------------------------------------------------------------|---------------------------------|
| <b>TITLE</b>                  |        |                                                                                                                                                                                                                                                                                                      |                                 |
| Title                         | 1      | Identify the report as a systematic review.                                                                                                                                                                                                                                                          | Page 1                          |
| <b>ABSTRACT</b>               |        |                                                                                                                                                                                                                                                                                                      |                                 |
| Abstract                      | 2      | See the PRISMA 2020 for Abstracts checklist.                                                                                                                                                                                                                                                         | Page 2                          |
| <b>INTRODUCTION</b>           |        |                                                                                                                                                                                                                                                                                                      |                                 |
| Rationale                     | 3      | Describe the rationale for the review in the context of existing knowledge.                                                                                                                                                                                                                          | Pages 2-4                       |
| Objectives                    | 4      | Provide an explicit statement of the objective(s) or question(s) the review addresses.                                                                                                                                                                                                               | Page 4                          |
| <b>METHODS</b>                |        |                                                                                                                                                                                                                                                                                                      |                                 |
| Eligibility criteria          | 5      | Specify the inclusion and exclusion criteria for the review and how studies were grouped for the syntheses.                                                                                                                                                                                          | Page 5                          |
| Information sources           | 6      | Specify all databases, registers, websites, organisations, reference lists and other sources searched or consulted to identify studies. Specify the date when each source was last searched or consulted.                                                                                            | Page 4                          |
| Search strategy               | 7      | Present the full search strategies for all databases, registers and websites, including any filters and limits used.                                                                                                                                                                                 | Appendix 1                      |
| Selection process             | 8      | Specify the methods used to decide whether a study met the inclusion criteria of the review, including how many reviewers screened each record and each report retrieved, whether they worked independently, and if applicable, details of automation tools used in the process.                     | Page 5                          |
| Data collection process       | 9      | Specify the methods used to collect data from reports, including how many reviewers collected data from each report, whether they worked independently, any processes for obtaining or confirming data from study investigators, and if applicable, details of automation tools used in the process. | Page 5                          |
| Data items                    | 10a    | List and define all outcomes for which data were sought. Specify whether all results that were compatible with each outcome domain in each study were sought (e.g. for all measures, time points, analyses), and if not, the methods used to decide which results to collect.                        | Page 5                          |
|                               | 10b    | List and define all other variables for which data were sought (e.g. participant and intervention characteristics, funding sources). Describe any assumptions made about any missing or unclear information.                                                                                         | Page 5                          |
| Study risk of bias assessment | 11     | Specify the methods used to assess risk of bias in the included studies, including details of the tool(s) used, how many reviewers assessed each study and whether they worked independently, and if applicable, details of automation tools used in the process.                                    | Page 5                          |
| Effect measures               | 12     | Specify for each outcome the effect measure(s) (e.g. risk ratio, mean difference) used in the synthesis or presentation of results.                                                                                                                                                                  | N/A                             |
| Synthesis methods             | 13a    | Describe the processes used to decide which studies were eligible for each synthesis (e.g. tabulating the study intervention characteristics and comparing against the planned groups for each synthesis (item #5)).                                                                                 | Page 5                          |
|                               | 13b    | Describe any methods required to prepare the data for presentation or synthesis, such as handling of missing summary statistics, or data conversions.                                                                                                                                                | N/A                             |
|                               | 13c    | Describe any methods used to tabulate or visually display results of individual studies and syntheses.                                                                                                                                                                                               | N/A                             |
|                               | 13d    | Describe any methods used to synthesize results and provide a rationale for the choice(s). If meta-analysis was performed, describe the model(s), method(s) to identify the presence and extent of statistical heterogeneity, and software package(s) used.                                          | N/A                             |
|                               | 13e    | Describe any methods used to explore possible causes of heterogeneity among study results (e.g. subgroup analysis, meta-regression).                                                                                                                                                                 | N/A                             |
|                               | 13f    | Describe any sensitivity analyses conducted to assess robustness of the synthesized results.                                                                                                                                                                                                         | N/A                             |
| Reporting bias assessment     | 14     | Describe any methods used to assess risk of bias due to missing results in a synthesis (arising from reporting biases).                                                                                                                                                                              | N/A                             |
| Certainty assessment          | 15     | Describe any methods used to assess certainty (or confidence) in the body of evidence for an outcome.                                                                                                                                                                                                | N/A                             |

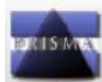

# PRISMA 2020 Checklist

1  
2  
3  
4  
5  
6  
7  
8  
9  
10  
11  
12  
13  
14  
15  
16  
17  
18  
19  
20  
21  
22  
23  
24  
25  
26  
27  
28  
29  
30  
31  
32  
33  
34  
35  
36  
37  
38  
39  
40  
41  
42  
43  
44  
45  
46  
47

| Section and Topic                              | Item # | Checklist item                                                                                                                                                                                                                                                                       | Location where item is reported |
|------------------------------------------------|--------|--------------------------------------------------------------------------------------------------------------------------------------------------------------------------------------------------------------------------------------------------------------------------------------|---------------------------------|
| <b>RESULTS</b>                                 |        |                                                                                                                                                                                                                                                                                      |                                 |
| Study selection                                | 16a    | Describe the results of the search and selection process, from the number of records identified in the search to the number of studies included in the review, ideally using a flow diagram.                                                                                         | Page 5                          |
|                                                | 16b    | Cite studies that might appear to meet the inclusion criteria, but which were excluded, and explain why they were excluded.                                                                                                                                                          | N/A                             |
| Study characteristics                          | 17     | Cite each included study and present its characteristics.                                                                                                                                                                                                                            | Page 5<br>Table 1               |
| Risk of bias in studies                        | 18     | Present assessments of risk of bias for each included study.                                                                                                                                                                                                                         | N/A                             |
| Results of individual studies                  | 19     | For all outcomes, present, for each study: (a) summary statistics for each group (where appropriate) and (b) an effect estimate and its precision (e.g. confidence/credible interval), ideally using structured tables or plots.                                                     | Page 6-7                        |
| Results of syntheses                           | 20a    | For each synthesis, briefly summarise the characteristics and risk of bias among contributing studies.                                                                                                                                                                               | Page 6-7                        |
|                                                | 20b    | Present results of all statistical syntheses conducted. If meta-analysis was done, present for each the summary estimate and its precision (e.g. confidence/credible interval) and measures of statistical heterogeneity. If comparing groups, describe the direction of the effect. | Page 6-7                        |
|                                                | 20c    | Present results of all investigations of possible causes of heterogeneity among study results.                                                                                                                                                                                       | N/A                             |
|                                                | 20d    | Present results of all sensitivity analyses conducted to assess the robustness of the synthesized results.                                                                                                                                                                           | N/A                             |
| Reporting biases                               | 21     | Present assessments of risk of bias due to missing results (arising from reporting biases) for each synthesis assessed.                                                                                                                                                              | N/A                             |
| Certainty of evidence                          | 22     | Present assessments of certainty (or confidence) in the body of evidence for each outcome assessed.                                                                                                                                                                                  | N/A                             |
| <b>DISCUSSION</b>                              |        |                                                                                                                                                                                                                                                                                      |                                 |
| Discussion                                     | 23a    | Provide a general interpretation of the results in the context of other evidence.                                                                                                                                                                                                    | Page 7-9                        |
|                                                | 23b    | Discuss any limitations of the evidence included in the review.                                                                                                                                                                                                                      | Page 9-10                       |
|                                                | 23c    | Discuss any limitations of the review processes used.                                                                                                                                                                                                                                | Page 9-10                       |
|                                                | 23d    | Discuss implications of the results for practice, policy, and future research.                                                                                                                                                                                                       | Page 10                         |
| <b>OTHER INFORMATION</b>                       |        |                                                                                                                                                                                                                                                                                      |                                 |
| Registration and protocol                      | 24a    | Provide registration information for the review, including register name and registration number, or state that the review was not registered.                                                                                                                                       | N/A                             |
|                                                | 24b    | Indicate where the review protocol can be accessed, or state that a protocol was not prepared.                                                                                                                                                                                       | N/A                             |
|                                                | 24c    | Describe and explain any amendments to information provided at registration or in the protocol.                                                                                                                                                                                      | N/A                             |
| Support                                        | 25     | Describe sources of financial or non-financial support for the review, and the role of the funders or sponsors in the review.                                                                                                                                                        | Page 11                         |
| Competing interests                            | 26     | Declare any competing interests of review authors.                                                                                                                                                                                                                                   | Page 11                         |
| Availability of data, code and other materials | 27     | Report which of the following are publicly available and where they can be found: template data collection forms; data extracted from included studies; data used for all analyses; analytic code; any other materials used in the review.                                           | Page 11                         |

From: Page MJ, McKenzie JE, Bossuyt PM, Boutron I, Hoffmann TC, Mulrow CD, et al. The PRISMA 2020 statement: an updated guideline for reporting systematic reviews. *BMJ* 2021;372:n71. doi: 10.1136/bmj.n71 For more information, visit: <http://www.prisma-statement.org>



# BMJ Open

## Delays in Seeking, Reaching and Access to Quality Cancer Care in Sub-Saharan Africa: A Systematic Review of the Literature

|                                 |                                                                                                                                                                                                                                                                                                                                                                                                                                                                                                                                                                                                                                                                                                                                                                                                                                                               |
|---------------------------------|---------------------------------------------------------------------------------------------------------------------------------------------------------------------------------------------------------------------------------------------------------------------------------------------------------------------------------------------------------------------------------------------------------------------------------------------------------------------------------------------------------------------------------------------------------------------------------------------------------------------------------------------------------------------------------------------------------------------------------------------------------------------------------------------------------------------------------------------------------------|
| Journal:                        | <i>BMJ Open</i>                                                                                                                                                                                                                                                                                                                                                                                                                                                                                                                                                                                                                                                                                                                                                                                                                                               |
| Manuscript ID                   | bmjopen-2022-067715.R1                                                                                                                                                                                                                                                                                                                                                                                                                                                                                                                                                                                                                                                                                                                                                                                                                                        |
| Article Type:                   | Original research                                                                                                                                                                                                                                                                                                                                                                                                                                                                                                                                                                                                                                                                                                                                                                                                                                             |
| Date Submitted by the Author:   | 25-Jan-2023                                                                                                                                                                                                                                                                                                                                                                                                                                                                                                                                                                                                                                                                                                                                                                                                                                                   |
| Complete List of Authors:       | Lombe, Dorothy; Te Whatu Ora Health NZ MidCentral, Radiation Oncology<br>Mwamba, Monde; ZAMBART<br>Msadabwe, Susan; Cancer Diseases Hospital<br>Bond, Virginia ; London School of Hygiene & Tropical Medicine and ZAMBART, Social Science<br>Simwinga, Musonda; Zambart<br>Ssemata, Andrew Sentoogo; The Medical Research Council/ Uganda Virus Research Institute and London School of Hygiene & Tropical Medicine (MRC/UVRI & LSHTM) Uganda Research Unit<br>Muhumuza, Richard; The Medical Research Council/ Uganda Virus Research Institute and London School of Hygiene & Tropical Medicine (MRC/UVRI & LSHTM) Uganda Research Unit<br>Seeley, Janet; London School of Hygiene and Tropical Medicine, Department of Global Health & Development<br>Mwaka, Amos; Makerere University CHS, Department of Medicine<br>Aggarwal, Ajay; King's College London |
| <b>Primary Subject Heading</b>: | Health policy                                                                                                                                                                                                                                                                                                                                                                                                                                                                                                                                                                                                                                                                                                                                                                                                                                                 |
| Secondary Subject Heading:      | Global health                                                                                                                                                                                                                                                                                                                                                                                                                                                                                                                                                                                                                                                                                                                                                                                                                                                 |
| Keywords:                       | Adult oncology < ONCOLOGY, Urological tumours < ONCOLOGY, PUBLIC HEALTH, Health policy < HEALTH SERVICES ADMINISTRATION & MANAGEMENT                                                                                                                                                                                                                                                                                                                                                                                                                                                                                                                                                                                                                                                                                                                          |
|                                 |                                                                                                                                                                                                                                                                                                                                                                                                                                                                                                                                                                                                                                                                                                                                                                                                                                                               |

SCHOLARONE™  
Manuscripts



I, the Submitting Author has the right to grant and does grant on behalf of all authors of the Work (as defined in the below author licence), an exclusive licence and/or a non-exclusive licence for contributions from authors who are: i) UK Crown employees; ii) where BMJ has agreed a CC-BY licence shall apply, and/or iii) in accordance with the terms applicable for US Federal Government officers or employees acting as part of their official duties; on a worldwide, perpetual, irrevocable, royalty-free basis to BMJ Publishing Group Ltd ("BMJ") its licensees and where the relevant Journal is co-owned by BMJ to the co-owners of the Journal, to publish the Work in this journal and any other BMJ products and to exploit all rights, as set out in our [licence](#).

The Submitting Author accepts and understands that any supply made under these terms is made by BMJ to the Submitting Author unless you are acting as an employee on behalf of your employer or a postgraduate student of an affiliated institution which is paying any applicable article publishing charge ("APC") for Open Access articles. Where the Submitting Author wishes to make the Work available on an Open Access basis (and intends to pay the relevant APC), the terms of reuse of such Open Access shall be governed by a Creative Commons licence – details of these licences and which [Creative Commons](#) licence will apply to this Work are set out in our licence referred to above.

Other than as permitted in any relevant BMJ Author's Self Archiving Policies, I confirm this Work has not been accepted for publication elsewhere, is not being considered for publication elsewhere and does not duplicate material already published. I confirm all authors consent to publication of this Work and authorise the granting of this licence.

## Delays in Seeking, Reaching and Access to Quality Cancer Care in Sub-Saharan Africa: A Systematic Review of the Literature

Corresponding author:

Dr Dorothy Chilambe Lombe

Postal address: Gate 2, Heretaunga Street, Private Bag 11036, Palmerston North 4442.

Email: [dorothylombe@yahoo.com](mailto:dorothylombe@yahoo.com)

Dorothy Chilambe Lombe<sup>1</sup>

Monde Mwamba<sup>2</sup>

Susan Msadabwe<sup>3</sup>

Virginia Bond<sup>2,4</sup>

Musonda Simwinga<sup>2</sup>

Andrew Sentoogo Ssemata<sup>5</sup>

Richard Muhumuza<sup>5</sup>

Janet Seeley<sup>4,5</sup>

Amos Deo Mwaka<sup>6</sup>

Ajay Aggarwal<sup>4,7</sup>

<sup>1</sup>Cancer Screening, Treatment and Support MidCentral, New Zealand

<sup>2</sup>Zambart, School of Public Health, Ridgeway Campus, University of Zambia, Lusaka, Zambia

<sup>3</sup>Cancer Diseases Hospital, Lusaka Zambia

<sup>4</sup>London School of Hygiene & Tropical Medicine (LSHTM) Keppel Street, London, WC1E 7HT

<sup>5</sup>The Medical Research Council/ Uganda Virus Research Institute and London School of Hygiene & Tropical Medicine (MRC/UVRI & LSHTM) Uganda Research Unit. P.O. Box 49 Entebbe

<sup>6</sup>Department of Medicine, Faculty of Medicine, Gulu University, Gulu, Uganda.

<sup>7</sup>Institute of Cancer Policy, King's College London, London SE1 9RT, UK

Keywords: sub Saharan Africa, cancer, delays, seeking care, diagnosis, treatment

Word count: 3130

## Abstract

**Objectives** The burden of cancer in sub-Saharan Africa (SSA) continues to grow. Late presentation and delays in diagnosis, and treatment, consistently translate into poor outcomes. The aim was to amalgamate the factors influencing diagnostic and treatment delays of adult solid tumours in SSA

**Design and settings** We undertook a systematic review of the literature to present a summary of the barriers to optimal cancer control in SSA using the three delays framework.

**Methods** The search was conducted in PubMed and Embase for articles published between January 1995 and March 2021. We followed the Preferred Reporting Items for Systematic Reviews and Meta-Analyses (PRISMA) guidance. Inclusion criteria were all solid cancers, SSA countries, quantitative or mixed method research and publications in the English language. Quality of studies was assessed with ROBINS-E tool.

**Findings** 57 studies were included. 40% from Nigeria and Ethiopia. Breast and cervical cancer represented 70%. Most studies were conducted in the hospital setting. Forty-three studies were evaluated having a high risk of bias at preliminary stages of quality assessment. Fourteen studies met the criteria for full assessment and all totaled to either high or very high overall risk of bias across 7 domains. The major issues identified included the indirect and direct costs; lack of coordination between primary, secondary and tertiary health care sectors; inadequate staffing and trust and reliance on traditional healers.

**Conclusions** Robust methodological research to inform policy on the barriers to seeking, reaching and receiving quality cancer care in SSA is absent. The focus of most research is on breast and cervical cancer. Research outputs are concentrated in few countries. Multiple barriers are present for individual patients from symptom appraisal of cancer to its treatment. It is imperative that we investigate the complex interaction of these factors to build resilient and effective cancer control programs.

### Strengths and limitations of this study

- The study interrogated 2 layers of factors (context and delays) by considering the '3-Delays Framework'
- The study conformed to the appropriate methodology of Preferred Reporting Items for Systematic Reviews and Meta-Analyses (PRISMA) guidance
- The quality of the studies included studies was largely poor but rigorous assessment of risk of bias across 7 domains allowed deduction key study findings that are a useful steppingstone for further investigation

## INTRODUCTION

The cancer control agenda has globally received a high level of political recognition.<sup>(1,2)</sup> In sub-Saharan Africa (SSA), with an age standardized incidence and mortality rate of 128.2 and 87.2 per 100 000 people respectively, cancer is becoming a leading public health problem.<sup>(3)</sup> There is growing emphasis that the successful translation of commitments to support cancer control policy into substantial reductions in cancer morbidity and mortality must occur on a locally adapted evidence-based platform but robust local research is lacking in contrast with developed nations.

Countries in SSA operate in an environment of low resources, which has resulted in cancer management largely focusing on those presenting with overt symptomatic disease.<sup>(4,5)</sup> The system level challenges are heterogenous across SSA but factors germane to all countries includes limited health care financing, inadequate financial protection (universal health coverage), inadequate infrastructure development as well as the need for health systems to manage a dual burden of infectious disease and growing non-communicable diseases.<sup>(5–8)</sup>

The lack of coordination and fragmented pathways in cancer care at all stages including prevention, symptom awareness, diagnosis, treatment and post treatment care makes cancer hard to manage in developing nations and ultimately result in high levels of premature mortality.<sup>(9)</sup> Interventions occur in silos within three distinct groups 1) across specific cancer types which are prioritized<sup>(10)</sup>; 2) across prevention, treatment, palliation<sup>(11)</sup>; 3) across primary, secondary and tertiary health care sectors<sup>(12)</sup>. Additionally, building strong system linkages to coordinate cancer care across primary, secondary and tertiary sectors within country are generally overlooked and this results in critical delays.<sup>(9)</sup>

Fragmented pathways of care and research priorities are also reflective of the dependence on external international financial donors which tend to support their own specific agendas perpetuating silos of development.<sup>(13,14)</sup> This approach can be considered reductionist as it fails to consider the system and structural drivers of inequalities in access to diagnosis and treatment.

Evaluation of the unique social, economic, geographic and cultural determinants for late diagnosis and poor treatment outcomes are imperative to provide locally generated evidence. This will ensure the effective implementation of national cancer control programs.<sup>(15,16)</sup> These factors are not just context specific (e.g., country, region) but also tumour specific. An array of factors including accessibility to care (distance and cost), quality of care, coordination of care across health care sectors, education and training, as well as intricate personal and community relationships (values, beliefs, socioeconomic parameters, gender) need to be interpreted in each situation and considered explicitly.

1  
2  
3 Empirical work has sought to identify the factors influencing cancer diagnosis and treatment  
4 delay.<sup>(17)</sup> However, to our knowledge there have been no attempts to synthesize the  
5 available evidence from primary quantitative research undertaken in the SSA context to  
6 inform cancer control policies and identify gaps in the current research literature. Gaps would  
7 include country settings, tumour types, or at-risk populations which remain under-  
8 researched. In addition, robust study designs need to be employed to help compare results  
9 between studies and provide further insights as part of the system evaluation.  
10  
11  
12

13  
14 In this review we used the 'Three Delays' framework to support the synthesis and  
15 classification of our research studies focusing on barriers to diagnosis and treatment. The  
16 Three delays framework has been used in other health conditions e.g. child and maternal  
17 health, emergency medicine however, to date it has not been applied to cancer care  
18 delivery.<sup>(18,19)</sup> The framework considers three contexts and three delays. The three  
19 contexts are the: Patient context (perceptions of disease, barriers to care, cost of illness);  
20 Provider context (care process quality and outcome evaluation, health care workers  
21 perceived system barriers); Community context (proximity and physical accessibility of  
22 services in the community). The three delays are: seeking care; reaching care; and receiving  
23 quality care<sup>(20)</sup> Delay 1 seeking care: This is the delay in recognizing illness and deciding to  
24 seek appropriate medical help outside the home. Delay 2 reaching care: This is the delay in  
25 reaching an appropriate health facility. Delay 3 receiving quality care: This is the delay in  
26 receiving quality care after reaching the health facility. The interconnection in the delays can  
27 be seen in Figure 1.  
28  
29  
30  
31  
32  
33  
34

35 The aim of this investigation was to identify common factors influencing diagnostic delays  
36 of adult solid tumours and highlight areas that require further study whether that be specific  
37 countries, tumour types or settings, in order to help target resources and inform  
38 interventions that reduce cancer survivorship disparities globally.  
39  
40  
41

## 42 **METHODS**

43 We undertook a systematic review following the Preferred Reporting Items for Systematic  
44 Reviews and Meta-Analyses (PRISMA) guidance. The PRISMA diagram is illustrated in  
45 Figure 2  
46  
47

### 48 Search strategy

49 The literature search was conducted on 8<sup>th</sup> March 2021 in PubMed and Embase for articles  
50 published between January 1995 and March 2021. The full search strategy is in the  
51 supplementary material as Appendix 1  
52  
53

### 54 Eligibility criteria

55 The study included published articles in the English language that focused on solid cancers.  
56 The primary research was focused on SSA countries. Types of studies included quantitative  
57 (surveys, observational studies) or studies using mixed methods research methodologies.  
58 The quantitative studies had to include patients who had received a diagnosis of cancer. We  
59 excluded studies that included paediatric populations, haematologic malignancies, as well  
60

assessments of public perceptions and awareness of cancer since the focus was on patients with a cancer diagnosis and treatment pathways. Haematological malignancies have been excluded because the pathways of referral, detection, management and prognosis are very different compared to solid organ malignancies and would require a separate evaluation.

#### Study selection

Two reviewers (DL and MM) screened the abstracts and full text articles with a third reviewer (AA) to resolve any conflicts. We utilized the systematic review tool Covidence to screen, extract and validate data.(21)

#### Data abstraction and synthesis

The two primary reviewers extracted and validated the entries together before merging the outputs. Data extracted included year of article publication; country of study; demographic characteristics (age, gender, HIV status, education, marital status, employment, income level); country level setting; disease subsite; study design; type of delay investigated, reasons for delay and primary outcomes.

Quality assessment was interrogated with ROBINS-E tool by DL and AA.(22)

#### Patient and public involvement

Patients and members of the public were not involved in the design, conduct or reporting of the systematic review.

## RESULTS

#### Study characteristics

An initial search identified 6391 articles of which 193 underwent full text review (Figure 2). Fifty-seven studies were included in our final sample and data extracted.(23–78) The full data extraction output is included in the supplementary material in Appendix 2.

#### *Country and setting profile*

The majority of studies were conducted in Nigeria, 15 (26%), Ethiopia, eight (14%) and South Africa, 7 (12%). Five (9%) were undertaken in Uganda, four (7%) in Kenya, and three (5%) in Rwanda. Four (7%) studies were carried out in more than one country. Only 9% (n=5) of the studies were carried out at national level. Of the remaining studies, two thirds were conducted at the hospital level (n=38) and a quarter (n=14) being conducted at regional level.

#### *Research design*

Two thirds of included studies used a cross sectional survey design. The rest of the studies included analysis of patient-level data collected retrospectively (23%) or prospectively (11%). Case control and Delphi studies represented 4% of studies.

#### *Tumour types*

Breast cancer was the most studied tumour type for our research question (53%, n=29) followed by cervix (18%, n=10). 21% of studies (n=12) evaluated multiple tumour types whilst there were smaller studies on colorectal cancer (n=2) and Kaposi's sarcoma (n=1). There were no eligible studies on other high burden diseases in SSA such as prostate cancer and esophageal cancer identified in the literature.

### Participant population

Patients identified in a hospital setting were the target population in 48 out of 56 studies. In the other studies, the target populations were: patients and clinicians (n=3), clinicians only (n=1), a combination of clinicians, public health opinion leaders and NGOs (n=1), patients in a community setting (n=2) and patients and health facility administrators (n=1)

### Assessment of study quality

Fourteen cohort studies met the eligibility for a full assessment. The scores across the domains are illustrated in Figure 3. The exposure and outcome characteristics are included in the supplemental material as Appendix 3. Two cohort studies did not require full interrogation as preliminary assessment of bias by asking the following three questions placed them in the very high-risk category i) Did the authors make any attempt to control for confounding? ii) Was the method of measuring exposure inappropriate? iii) Was the method of measuring the outcome inappropriate? The remaining 40 were surveys. However, all the studies provided valuable insights that we used in the narrative synthesis. A similar finding on data quality from this region has been highlighted before in a contemporary systematic on the routes to diagnosis of symptomatic cancer in SSA.<sup>(79)</sup> Figure 3 illustrates the different domains and proportions of bias across the studies. For the studies that were assessed comprehensively all of them had an overall judgement of high or very high risk of bias. In most studies the patient related confounders (age, marital status and socioeconomic status such as income and education level were collected as variables but not controlled for appropriately. Health systems factors were poorly accounted for in statistical analysis plans.

### Three delays framework

We synthesized the empirical studies into the three delay areas seeking, reaching and receiving quality cancer care. 37% (n=21) of the studies investigated all 3 delays whilst 42% (n=24) focused on 2 delays and 21% (n=12) on 1 delay. Table 1 outlines the how the various studies addressed the components of the three delays framework.

Table 1. Three delays Framework distribution of studies

| First author name | Year | Cancer type            | Country                                | N    | Setting  | Design    | 3 delays |
|-------------------|------|------------------------|----------------------------------------|------|----------|-----------|----------|
| Gebremariam(34)   | 2021 | Breast                 | Ethiopia                               | 223  | Regional | Retrospec | C        |
| Zelege(46)        | 2021 | Cervical               | Ethiopia                               | 410  | Hospital | Retrospec | A        |
| Mapanga(31)       | 2021 | Lung                   | S. Africa                              | 27   | Regional | Delphi    | A, B, C  |
| Nakaganda(29)     | 2020 | Multisite <sup>1</sup> | Uganda                                 | 359  | Hospital | Survey    | A, B, C  |
| Tesfaw(63)        | 2020 | Breast                 | Ethiopia                               | 426  | Regional | Retrospec | A, C     |
| Tesfaw(65)        | 2020 | Breast                 | Ethiopia                               | 371  | Regional | Survey    | A, C     |
| Reibold(25)       | 2020 | Breast                 | Ethiopia                               | 51   | Hospital | Survey    | C        |
| Knapp(54)         | 2020 | Breast                 | Nigeria                                | 609  | Hospital | Retrospec | A, B     |
| Leng(62)          | 2020 | Multisite <sup>2</sup> | Nigeria                                | 186  | Hospital | Survey    | A, B, C  |
| Togawa(55)        | 2020 | Breast                 | Namibia<br>Nigeria<br>Uganda<br>Zambia | 1518 | Hospital | Survey    | A,C      |
| Swanson(76)       | 2020 | cervical               | Uganda                                 | 268  | Hospital | Survey    | C        |



|                        |      |                           |                                           |      |          |              |         |
|------------------------|------|---------------------------|-------------------------------------------|------|----------|--------------|---------|
| <b>Foerster(40)</b>    | 2020 | Breast                    | Uganda,<br>Zambia,<br>Namibia,<br>Nigeria | 1429 | Hospital | Survey       | A, B, C |
| <b>Dereje(45)</b>      | 2020 | Cervical                  | Ethiopia                                  | 212  | Regional | Survey       | A, C    |
| <b>Dereje(44)</b>      | 2020 | Cervical                  | Ethiopia                                  | 231  | Regional | Survey       | A, B    |
| <b>Agodirin(78)</b>    | 2020 | Breast                    | Nigeria                                   | 420  | Regional | Survey       | A, B, C |
| <b>Martin(28)</b>      | 2019 | cancer type not specified | Rwanda                                    | 73   | National | Survey       | C       |
| <b>Page(66)</b>        | 2019 | cervical                  | Kenya                                     | 505  | Regional | Prospect     | A,B     |
| <b>Low(43)</b>         | 2019 | Multisite <sup>3</sup>    | Uganda                                    | 100  | Hospital | Survey       | A, B    |
| <b>Wambalaba(69)</b>   | 2019 | Multisite <sup>4</sup>    | Kenya                                     | 1048 | National | Retrospec    | A, C    |
| <b>Grosse Frie(57)</b> | 2019 | Breast                    | Mali                                      | 124  | Regional | Survey       | A, B, C |
| <b>Yang(41)</b>        | 2019 | Breast                    | Tanzania                                  | 196  | Hospital | Survey       | B       |
| <b>Schleimer(27)</b>   | 2019 | Breast                    | Rwanda                                    | 151  | Regional | Retrospec    | A, B, C |
| <b>Foerster(61)</b>    | 2019 | Breast                    | Uganda<br>Nigeria<br>Namibia              | 1335 | Hospital | Prospect     | A, B, C |
| <b>Tapera(56)</b>      | 2019 | cervical                  | Zimbabwe                                  | 78   | Regional | Survey       | A, B, C |
| <b>Agodirin(60)</b>    | 2019 | Breast                    | Nigeria                                   | 237  | Regional | Survey       | A, B, C |
| <b>Rayne(33)</b>       | 2019 | Breast                    | S. Africa                                 | 252  | Hospital | Survey       | A, B    |
| <b>Subramanian(52)</b> | 2019 | Breast                    | Kenya                                     | 800  | Regional | Survey       | A, B, C |
| <b>Olarewaju(42)</b>   | 2019 | breast                    | Nigeria                                   | 275  | Hospital | Survey       | A, B, C |
| <b>Ajah(30)</b>        | 2019 | Multisite <sup>5</sup>    | Nigeria                                   | 95   | Hospital | Survey       | A       |
| <b>Martei(59)</b>      | 2019 | Multisite <sup>6</sup>    | Botswana                                  | 286  | Hospital | Retrospec    | A       |
| <b>Herbst(24)</b>      | 2018 | Colorectal                | S. Africa                                 | 162  | Hospital | Retrospec    | C       |
| <b>Anakwenze(50)</b>   | 2018 | Multisite <sup>7</sup>    | Botswana                                  | 214  | Hospital | Survey       | A, B    |
| <b>Moodley(53)</b>     | 2018 | Breast                    | S. Africa                                 | 201  | Hospital | Survey       | A, B    |
| <b>Joffe</b>           | 2018 | Breast                    | S. Africa                                 | 499  | Hospital | Survey       | A, B, C |
| <b>Awofeso(70)</b>     | 2018 | Breast, Cervical          | Nigeria                                   | 105  | Hospital | Survey       | A, B, C |
| <b>Bhatia(67)</b>      | 2018 | Multisite <sup>8</sup>    | Botswana                                  | 214  | Hospital | Survey       | A,B     |
| <b>Oladeji(32)</b>     | 2017 | Multisite <sup>9</sup>    | Nigeria                                   | 218  | Hospital | Survey       | A, B, C |
| <b>Jedy-Agba(39)</b>   | 2017 | Breast                    | Nigeria                                   | 316  | National | Case-control | A, B    |
| <b>Alatise(58)</b>     | 2017 | colorectal                | Nigeria                                   | 127  | Hospital | Survey       | A, B, C |
| <b>Cacala(51)</b>      | 2017 | Breast                    | S. Africa                                 | 172  | Hospital | Prospect     | A, B    |
| <b>Brinton(48)</b>     | 2016 | Breast                    | Ghana                                     | 1184 | Regional | Survey       | A, B    |
| <b>Mlange(64)</b>      | 2016 | Cervical                  | Tanzania                                  | 202  | Hospital | Survey       | A, B    |
| <b>Mwaka(73)</b>       | 2015 | Cervical                  | Uganda                                    | 149  | Hospital | Survey       | A, B    |
| <b>Long(47)</b>        | 2015 | Multisite <sup>10</sup>   | Cameroon                                  | 220  | Hospital | Survey       | A, B, C |
| <b>Pace(37)</b>        | 2015 | Breast                    | Rwanda                                    | 144  | National | Survey       | A, B, C |
| <b>Tadesse(74)</b>     | 2015 | cervical                  | Ethiopia                                  | 198  | Hospital | Survey       | B, C    |

|                          |      |            |                        |      |          |           |         |
|--------------------------|------|------------|------------------------|------|----------|-----------|---------|
| <b>Dickens(75)</b>       | 2014 | Breast     | S. Africa              | 1071 | Hospital | Retrospec | B       |
| <b>De Boer(72)</b>       | 2014 | K. Sarcoma | Uganda                 | 161  | Hospital | Retrospec | A, B    |
| <b>Ntirenganya(71)</b>   | 2014 | Breast     | Rwanda<br>Sierra Leone | 6820 | National | Survey    | A, B    |
| <b>Fasunla(49)</b>       | 2013 | Sinonasal  | Nigeria                | 61   | Hospital | Survey    | A, B, C |
| <b>Ibrahim(68)</b>       | 2011 | cervical   | Sudan                  | 197  | Hospital | Retrospec | B       |
| <b>Anyanwu(23)</b>       | 2011 | breast     | Nigeria                | 275  | Hospital | Retrospec | B, C    |
| <b>Otieno(35)</b>        | 2010 | Breast     | Kenya                  | 166  | Hospital | Survey    | A, B, C |
| <b>Ezeome(38)</b>        | 2009 | Breast     | Nigeria                | 164  | Hospital | Survey    | A, B    |
| <b>Clegg-Lamptey(77)</b> | 2009 | breast     | Ghana                  | 101  | Hospital | Survey    | A, B, C |
| <b>Ukwenya(36)</b>       | 2008 | Breast     | Nigeria                | 111  | Hospital | Survey    | A, B, C |

1 – Cervix, Kaposi's sarcoma, breast, prostate, esophagus; 2 – breast, cervical, head and neck, prostate; 3 – KS, cervical cancer, breast cancer, esophageal cancer, head and neck cancer, non-Hodgkin lymphoma, vulvovaginal, prostate, conjunctival squam cell ca, penile, melanoma; 4 – Cervix, Breast, Esophagus, Prostate, Ovary, Colon, Thyroid, Pancreatic, Lung, Liver; 5 – Cervical, ovarian, endometrial, vulva, choriocarcinoma, leiomyosarcoma; 6 – cervical, breast, prostate, esophageal, lung, uterine, ovarian, colorectal, head and neck cancers, Kaposi sarcoma; 7 – Cervical, breast, head and neck, vulvar, Kaposi sarcoma, endometrial, penile, anal, esophageal, lymphoma, prostate; 8 – Cervical, Breast, Head and neck, Vulvar, Kaposi's sarcoma, Endometrial, Penile, Anal, Oesophageal, Lymphoma, Prostate; 9 – Uterine cervix, breast, head and neck, prostate, GIT; 10 – skin, breast, colorectal, gynecologic, anal; 3 delays codes A – seeking care; B – reaching care; C – receiving quality care; S. Africa – South Africa; Retrospec – Retrospective; Prospect – Prospective; K. Sarcom – Kaposi Sarcoma; N – sample size

The reasons of the delays amalgamated from the studies and identified as contributing to each type of systems delay are outlined in Table 2. The comprehensive output with outcomes of the data extraction is included as Appendix 2 in the supplementary material.

Table 2. Reasons for three delays

| Reasons for seeking care delay                                                                                                                                                                                                                                                                                                                                                                                                                                                                                                                                                                                                                                                                                                                                                                                                                                                                                                                                                                                                                               | Reasons for reaching care delay                                                                                                                                                                                                                                                                                                                                                                                                                                                                                                                                                                                                                                                                                                                                                                                                                                                                                                | Reasons for receiving quality care delay                                                                                                                                                                                                                                                                                                                                                                                                                                                                                                                                                                                                                                                                                                                                                                                                                                                                                                                                                                                                                                                                                                                                                                                                                   |
|--------------------------------------------------------------------------------------------------------------------------------------------------------------------------------------------------------------------------------------------------------------------------------------------------------------------------------------------------------------------------------------------------------------------------------------------------------------------------------------------------------------------------------------------------------------------------------------------------------------------------------------------------------------------------------------------------------------------------------------------------------------------------------------------------------------------------------------------------------------------------------------------------------------------------------------------------------------------------------------------------------------------------------------------------------------|--------------------------------------------------------------------------------------------------------------------------------------------------------------------------------------------------------------------------------------------------------------------------------------------------------------------------------------------------------------------------------------------------------------------------------------------------------------------------------------------------------------------------------------------------------------------------------------------------------------------------------------------------------------------------------------------------------------------------------------------------------------------------------------------------------------------------------------------------------------------------------------------------------------------------------|------------------------------------------------------------------------------------------------------------------------------------------------------------------------------------------------------------------------------------------------------------------------------------------------------------------------------------------------------------------------------------------------------------------------------------------------------------------------------------------------------------------------------------------------------------------------------------------------------------------------------------------------------------------------------------------------------------------------------------------------------------------------------------------------------------------------------------------------------------------------------------------------------------------------------------------------------------------------------------------------------------------------------------------------------------------------------------------------------------------------------------------------------------------------------------------------------------------------------------------------------------|
| <ul style="list-style-type: none"> <li>• Anticipated expense of treatment</li> <li>• Anticipated long waiting time at clinic</li> <li>• Belief in witchcraft</li> <li>• Busy schedule</li> <li>• Denial</li> <li>• Distance</li> <li>• Economic impact of taking time off work</li> <li>• Embarrassment</li> <li>• Family and friends' disapproval</li> <li>• Fear of being asked to stop habits e.g. smoking</li> <li>• Fear of death</li> <li>• Fear of diagnosis</li> <li>• Fear of doctors</li> <li>• Fear of dying</li> <li>• Fear of job loss</li> <li>• Fear of losing part of body (e.g. breast)</li> <li>• Fear of missing family commitments because of treatment</li> <li>• Fear of telling people of illness</li> <li>• Fear of treatment</li> <li>• Fear treatment is painful</li> <li>• Financial incapability</li> <li>• Ignorance on available treatment</li> <li>• Ignorance on how to seek healthcare</li> <li>• Lack of awareness of symptoms</li> <li>• Lack of personal initiative</li> <li>• Lack of trust in health system</li> </ul> | <ul style="list-style-type: none"> <li>• Dependence on others for transport</li> <li>• Difficulty making appointment or reaching doctor</li> <li>• Distance</li> <li>• Earlier alternative treatment</li> <li>• Family responsibilities</li> <li>• High cost of prediagnostic costs</li> <li>• High cost of transport</li> <li>• Inability to afford clinic visits</li> <li>• Lack of knowledge of estimated distance to nearest service</li> <li>• Lack of money (for transport)</li> <li>• Lack of navigation in primary care</li> <li>• Lack of needed caregiver to accompany to facilities</li> <li>• Long investigation time at first contact</li> <li>• Misdiagnosis at lower levels</li> <li>• Obligations at home</li> <li>• Time restraints</li> <li>• Turned away from clinics for arriving late</li> <li>• Was told by health care worker there was no treatment for disease</li> <li>• Work commitments</li> </ul> | <ul style="list-style-type: none"> <li>• Absence of multidisciplinary team care</li> <li>• Burn out and disinterest of health care workers</li> <li>• Cancer not priority</li> <li>• Chemotherapy stock outs</li> <li>• Communication barriers</li> <li>• Declining treatment</li> <li>• Defaulting because of side effects of drugs</li> <li>• Diagnostic delay</li> <li>• Failure to come back for follow up diagnostic or treatment appointments</li> <li>• Failure to find accommodation as outpatients close to treatment centre</li> <li>• Family commitments</li> <li>• Fear of treatment (e.g. mastectomy)</li> <li>• Fear of wasting doctor's time</li> <li>• Few specialists</li> <li>• Financial incapability</li> <li>• High cost of medicines</li> <li>• High patient volume compared to resources</li> <li>• Lack of consent</li> <li>• Lack of continuity of care by same healthcare workers</li> <li>• Lack of palliative care and counselling services</li> <li>• Lack of pathology and screening services</li> <li>• Lack of smoking cessation clinics</li> <li>• Lack of specific appointments with specialists</li> <li>• Language barrier</li> <li>• Long appointments, waiting periods</li> <li>• Management of pregnancy</li> </ul> |

|                                                                                                                                                                                                                                                                                                                                                                                                                                                                                                                                                                                                                                                                                                                                                                                          |                                                                                                                                                                                                                                                                                                                                                                                                                                                                                                                                                                                                                                                                                                                                                                                                                                                          |
|------------------------------------------------------------------------------------------------------------------------------------------------------------------------------------------------------------------------------------------------------------------------------------------------------------------------------------------------------------------------------------------------------------------------------------------------------------------------------------------------------------------------------------------------------------------------------------------------------------------------------------------------------------------------------------------------------------------------------------------------------------------------------------------|----------------------------------------------------------------------------------------------------------------------------------------------------------------------------------------------------------------------------------------------------------------------------------------------------------------------------------------------------------------------------------------------------------------------------------------------------------------------------------------------------------------------------------------------------------------------------------------------------------------------------------------------------------------------------------------------------------------------------------------------------------------------------------------------------------------------------------------------------------|
| <ul style="list-style-type: none"> <li>• Low education</li> <li>• No health insurance</li> <li>• No one to look after children</li> <li>• Obligations at home</li> <li>• Preference for alternative therapies (herbal, homeopathy, Chinese, acupuncture)</li> <li>• Preference for care abroad</li> <li>• Preference for food supplements/organic foods</li> <li>• Preference for prayers and spiritual intervention</li> <li>• Pregnancy/lactation/menopause use</li> <li>• Prior bad experience at health centre of hospital</li> <li>• Prioritising day to day survival over seeking help</li> <li>• Putting others needs first</li> <li>• Secrecy</li> <li>• Stigma</li> <li>• Transport challenges (e.g. cost)</li> <li>• Travelled away from home (out of comfort zone)</li> </ul> | <ul style="list-style-type: none"> <li>• Misdiagnosis</li> <li>• No bed space</li> <li>• No relative to care for them during treatment</li> <li>• Not healthy enough to continue treatment</li> <li>• Patients changing mobile numbers so cannot be contacted for further management</li> <li>• Paying out of pocket expenses</li> <li>• Poor collaboration amongst health care workers</li> <li>• Poor nutrition</li> <li>• Poorly trained staff</li> <li>• Power outages</li> <li>• Pre-referral diagnosis not communicated</li> <li>• Preference for alternative therapies (herbal, Chinese, acupuncture, food supplements)</li> <li>• Preference to observe</li> <li>• Surgeon/operating room unavailability</li> <li>• Unavailability of treatment modality</li> <li>• Unwelcoming, demotivated and uncommitted staff turn patients away</li> </ul> |
|------------------------------------------------------------------------------------------------------------------------------------------------------------------------------------------------------------------------------------------------------------------------------------------------------------------------------------------------------------------------------------------------------------------------------------------------------------------------------------------------------------------------------------------------------------------------------------------------------------------------------------------------------------------------------------------------------------------------------------------------------------------------------------------|----------------------------------------------------------------------------------------------------------------------------------------------------------------------------------------------------------------------------------------------------------------------------------------------------------------------------------------------------------------------------------------------------------------------------------------------------------------------------------------------------------------------------------------------------------------------------------------------------------------------------------------------------------------------------------------------------------------------------------------------------------------------------------------------------------------------------------------------------------|

### Seeking delay

Reasons for delays in seeking care included a lack of awareness about cancer and low health literacy which manifested itself as fears, false perceptions and beliefs and embarrassment about cancer.(26,28,31,32,35,37,38,40,42,44,51,55,58,60,64,65,67,70,71,73,77,78) There was also a preference for seeking treatment from traditional or faith-based healers.(27,30,32,35-38,42,44,46,48,49,51,55,57,58,65,70,71,77,78) Participants in the various studies recounted the belief they had not been sick enough or didn't have adequate money to justify abandoning their obligations (both financial and social)(26,27,29,31,37,38,42,45,51,52,55,56,58,72,77,78); they rather reassured themselves about the seriousness of symptoms (for example lumps) as the symptoms did not cause disability or pain in the early stages of disease and that it was self-limiting.(26,31,36-38,42,44,47,51,53,67,73,78) Additionally, not knowing where or how to enter the health system for symptoms before they cause life threatening conditions contributed to delays in seeking treatment.(31,37,44,46) The unknown costs of managing cancer was also noted to intimidate patients and delay presentation as a result.(26,44)

### Reaching care

The physical distance to appropriate care was cited as a major barrier for patients who have to take into consideration transport costs to specialist facilities, accommodation and subsistence costs.(23,27-29,32,33,37,40-42,47,50-52,55,56,60,62,71-73,77,78) Even when transport is made available, they carry the cost of being away from their jobs and families. Other than geographical distance, low levels of cancer care knowledge amongst primary level healthcare staff was also a barrier for referral of patients.(31,37,45,70,74,78) This was identified as a source of misdiagnosis and underlay the lack of

1 recognition for the urgency of transferring care to tertiary institutions. In one study, participants had  
2 reported that they had been misinformed at the primary level that their condition was incurable.(38)  
3

#### 4 **Receiving quality care**

5 The paucity of infrastructure, equipment, medication and human resources needed for cancer care  
6 underpinned the barriers to receiving quality cancer care.(28,62,69) We noted a lack of availability or poor  
7 quality diagnostic equipment and treatment facilities were also challenges identified.(58,62,70) Other  
8 factors included demotivated and burnt-out staff and the lack of specialist training of staff in  
9 cancer.(25,28,31,32,38,56,62) Tensions and mistrust of the system as a whole between the patients and  
10 healthcare providers operating in constrained environments were reported as contributing to factors that  
11 drove patients to alternate medicine or even simply abandon treatment.(31,47,52) In addition, the lack of  
12 availability of essential resources lead to high prices and catastrophic out of pocket expenses for the  
13 patients.(23,29,31,32,36,42,47,49,52,55,56,61,62,76,77)  
14  
15  
16  
17

#### 18 **Discussion**

19 The impact of delays in the cancer care pathway on persistent high mortality rates are well recognized. Sub  
20 Saharan African countries are called upon to accelerate the establishment and implementation of their  
21 cancer control plans and it is pertinent to recognize that whilst respecting the unique aspects of each nation,  
22 utilization of a common knowledge base avoids duplication and allows for prudent efficient use of scarce  
23 resources.(2,16) In this regard, results from research using a robust methodological approach provides a  
24 foundation for common knowledge that is applicable broadly.(17)  
25  
26  
27

28 However, our systematic review of studies in Sub-Saharan Africa investigating the barriers to access to  
29 cancer care demonstrates a very limited number of studies despite the importance of this subject area, with  
30 heterogeneity in study design which limits their translational impact. The publications we found were  
31 clustered to the Northern and West African regions and given the heterogenous factors influencing the SSA  
32 region data cannot reliably be extrapolated across the continent. In addition, 70% of the studies focused on  
33 breast and cervical cancer with major causes of cancer related mortality and morbidity such as prostate and  
34 esophageal cancer not addressed which is of major concern. The results highlight the need for a coordinated  
35 approach to manage these evidence gaps with no studies addressing the barriers to diagnosis and  
36 treatment of cancer identified in 35 of 48 countries in SSA.  
37  
38  
39

40 The capacity to conduct robust research is increasingly possible across countries in SSA but it requires  
41 considerable efforts to coordinate these resources to support a common agenda based on country and  
42 regional level priorities.(80,81) Presently, a discordance between research needs and research funding  
43 priorities across the continent has been accelerated by the synthetic external agendas in individual  
44 countries rather than supporting endogenous solutions driven by those experiencing the problems.(82,83)  
45 This is exemplified by our findings which show research is concentrated on a pool of 4 or 5 better resourced  
46 countries and two main tumour types likely related to the availability of external funding.  
47  
48  
49

50 Most published data have been obtained through cross sectional surveys, which detail the prevalence of  
51 reasons for delays but fail to account for important cofounding factors and system level processes to enable  
52 the effective problem solving. None the less they still provide a valuable baseline insights that we integrated  
53 into a "Three delays" model.  
54  
55

56 The common roots of the reasons for delays at each level of seeking, reaching, and receiving quality care as  
57 listed in Table 2. are firstly fear (apprehension or mistrust) and secondly, a lack of resources (financial,  
58 human or infrastructure). Across all delays cost is a major factor that influences the interval between the  
59 stages in the cancer pathway. Out of pocket expenses are high with patients requiring cover for transport,  
60

1 accommodation, diagnostic tests and medicines. A significant number of patients live under the poverty  
2 line and it may seem unrealistic for the families to spend on what is perceived to be an incurable disease in  
3 the first instance.(84) A recent study demonstrated the threat of catastrophic health expenditure that  
4 accompanies a cancer diagnosis even with the basic drugs in Low and Middle Income Countries (LMICs).(85)  
5

6 In seeking care, fear is compounded by the lack of awareness (knowledge) on the disease, availability of  
7 services or how to navigate the pathways to quality healthcare. It can drive patients to rely on familiar  
8 systems of alternative medicines (traditional healers, 'Chinese' medicine, Faith based healers). In addition  
9 to these challenges taking time off from work or domestic obligations to attend healthcare appointments  
10 is often relegated in terms of priorities due to financial and social implications. Societal expectations also  
11 create fear of stigmatism and promote secrecy that hinder free information flow between those seeking it  
12 and its custodians.  
13  
14

15  
16 For reaching care the lack of adequate coordination of services was the dominant theme. Poorly trained  
17 staff or lack of support for primary health care practitioners delayed referrals to more specialized services  
18 and the health system in such a scenario could possibly discourage patients on the curability of the  
19 condition. Links and relationships are essential between primary and secondary/tertiary healthcare as most  
20 patients will present first to local clinics or health posts. This is particularly important where systems are not  
21 electronically linked for results to be easily attainable between practitioners.  
22  
23

24 To receive quality care, patients need access to a health care the system with appropriate human resource  
25 and infrastructure (diagnostic and treatment). A lack of human resource encompasses both the  
26 competence of the workforce for tertiary services as well as the actual low numerical value of specialized  
27 knowledgeable staff leading to burnout. Equally a skilled and competent workforce without appropriate  
28 infrastructure or sufficient medication and surgical supplies cannot be expected to deliver quality care.  
29 Another aspect to consider for receiving quality care includes patient factors like good nutritional status,  
30 financial capacity, and social capital to undergo treatment. Acceptance and adherence to treatment are  
31 also integral to a successful intervention as investigated by Anyanwu et al.(23)  
32  
33  
34

35 The findings from our study suggests that reasons for delays are interlinked both at an individual level and  
36 population level (Figure 1). An individual with vulnerabilities at the seeking level phase would most likely  
37 experience repetitive barriers in reaching care as well as receiving quality care. An underdeveloped health  
38 system with poor linkages between primary health care and tertiary level care will inevitably have a large  
39 proportion of patients falling through the cracks between phases of care. This could be due to untimely  
40 referrals and inability to support diagnostic costs thereby relying on the patient to raise funds.  
41  
42  
43

#### 44 Limitations of the study

45 A major limitation in the interpretation and application of the findings of this research output is the quality  
46 of the included study. Recognition of this limitation and application of additional triangulation has assisted  
47 us to utilise what is available in this space.  
48

49 Future directions based on our findings would be to conduct more research studies that will provide quality  
50 data for policy formation and effective implementation  
51

#### 52 Conclusion

53 To see a reduction in cancer mortality in Sub Saharan Africa health systems need to address delays within  
54 the cancer pathway from initial presentation and appraisal to completion of treatment and the survivorship  
55 pathway. Holistic support for the patient as well as the workforce across the continuum and longitudinally  
56 in each phase is important to achieve good outcomes. Cognizance of the multiple barriers present for  
57 individual patients from developing a cancer to its treatment is important for policy makers and experts to  
58 build resilient and effective cancer control programs. With an individual in mind an effective population  
59  
60

1 approach can be achieved. Due to the paucity of organized data in SSA, the starting point of research is  
2 often extrapolated from other regions who have different realities. In carrying out this systematic review  
3 we intend to provide an organized pool of information that will provide a robust resource for other  
4 researchers seeking to conduct studies in SSA.  
5

6 Figure 1. Three Delays Framework

7 Figure 2. Flowchart of study selection as per Preferred Reporting

8 Figure 3. Quality assessment of studies , n= 14. *McGuinness, LA, Higgins, JPT. Risk-of-bias VISualization*  
9 *(robvis): An R package and Shiny web app for visualizing risk-of-bias assessments. Res Syn Meth. 2020; 1- 7.*  
10 *<https://doi.org/10.1002/jrsm.1411>*  
11  
12  
13

14  
15 **Contributorship** DCL, MM and AA were involved in all aspects. SM, VB, MS, ASS, RM, JS and ADM  
16 participated in study design, data interpretation, preparation and revision of manuscript  
17

18  
19 **Funding statement** This work was supported by the London School of Hygiene and Tropical Medicine's  
20 Wellcome Institutional Strategic Support Fund (grant reference 204928/Z/16/Z)  
21

22 **Competing interests** The authors have no financial disclosures or other conflicts of interest to report  
23

24  
25 **Ethics approval** Non-applicable. This study did not involve animal or human participants. Patient consent  
26 for publication was not required  
27

28  
29 **Data availability statement** No datasets were generated. The data extraction output is available as  
30 supplementary material.  
31  
32  
33  
34  
35  
36  
37  
38  
39  
40  
41  
42  
43  
44  
45  
46  
47  
48  
49  
50  
51  
52  
53  
54  
55  
56  
57  
58  
59  
60

## References

1. 58th World Health Assembly. WHA58.22 Cancer Prevention and Control. 2005.
2. 70th World Health Assembly. WHA70.12 Cancer Prevention and Control in the context of an integrated approach. 2017.
3. GLOBOCAN. Sub-Saharan Africa Hub Source: Globocan 2020 Cancer Statistics [Internet]. 2020 [cited 2022 Apr 10]. Available from: <https://gco.iarc.fr/today/data/factsheets/populations/971-sub-saharan-africa-hub-fact-sheets.pdf>
4. Azevedo MJ. The State of Health System(s) in Africa: Challenges and Opportunities. In: Historical Perspectives on the State of Health and Health Systems in Africa, Volume II [Internet]. Cham: Springer International Publishing; 2017 [cited 2021 Dec 26]. p. 1–73. Available from: [http://link.springer.com/10.1007/978-3-319-32564-4\\_1](http://link.springer.com/10.1007/978-3-319-32564-4_1)
5. Ifeagwu SC, Yang JC, Parkes-Ratanshi R, Brayne C. Health financing for universal health coverage in Sub-Saharan Africa: a systematic review. *Glob Health Res Policy* [Internet]. 2021 Dec [cited 2021 Dec 26];6(1):8. Available from: <https://ghrp.biomedcentral.com/articles/10.1186/s41256-021-00190-7>
6. Asante A, Wasike WSK, Ataguba JE. Health Financing in Sub-Saharan Africa: From Analytical Frameworks to Empirical Evaluation. *Appl Health Econ Health Policy* [Internet]. 2020 Dec [cited 2022 May 14];18(6):743–6. Available from: <http://link.springer.com/10.1007/s40258-020-00618-0>
7. Oleribe OE, Momoh J, Uzochukwu BS, Mbofana F, Adebisi A, Barbera T, et al. Identifying Key Challenges Facing Healthcare Systems In Africa And Potential Solutions. *Int J Gen Med* [Internet]. 2019 Nov [cited 2022 May 14];Volume 12:395–403. Available from: <https://www.dovepress.com/identifying-key-challenges-facing-healthcare-systems-in-africa-and-pot-peer-reviewed-article-IJGM>
8. Zeltner T, Riahi F, Huber J. Acute and Chronic Health Challenges in Sub-Saharan Africa: An Unfinished Agenda. In: Groth H, May JF, editors. *Africa's Population: In Search of a Demographic Dividend* [Internet]. Cham: Springer International Publishing; 2017 [cited 2022 May 14]. p. 283–97. Available from: [http://link.springer.com/10.1007/978-3-319-46889-1\\_18](http://link.springer.com/10.1007/978-3-319-46889-1_18)
9. World Health Organisation, Geneva. WHO report on cancer: setting priorities, investing wisely and providing care for all. 2020.
10. McKenzie F, Zietsman A, Galukande M, Anele A, Adisa C, Cubasch H, et al. African Breast Cancer—Disparities in Outcomes (ABC-DO): protocol of a multicountry mobile health prospective study of breast cancer survival in sub-Saharan Africa. *BMJ Open* [Internet]. 2016 Aug [cited 2023 Jan 23];6(8):e011390. Available from: <https://bmjopen.bmj.com/lookup/doi/10.1136/bmjopen-2016-011390>
11. Abdel-Wahab M, Bourque JM, Pynda Y, Izewska J, Van der Merwe D, Zubizarreta E, et al. Status of radiotherapy resources in Africa: an International Atomic Energy Agency analysis. *Lancet Oncol* [Internet]. 2013 Apr [cited 2023 Jan 23];14(4):e168–75. Available from: <https://linkinghub.elsevier.com/retrieve/pii/S1470204512705326>
12. Orem J. Building Modern Cancer Care Services in Sub-Saharan Africa Based on a Clinical-Research Care Model. *Am Soc Clin Oncol Educ Book* [Internet]. 2022 Jul [cited 2023 Jan 23];(42):423–8. Available from: [https://ascopubs.org/doi/10.1200/EDBK\\_349953](https://ascopubs.org/doi/10.1200/EDBK_349953)
13. Khan MS, Meghani A, Liverani M, Roychowdhury I, Parkhurst J. How do external donors influence national health policy processes? Experiences of domestic policy actors in Cambodia and Pakistan. *Health Policy Plan* [Internet]. 2018 Mar 1 [cited 2022 May 14];33(2):215–23. Available from: <https://academic.oup.com/heapol/article/33/2/215/4718134>



14. Ollila E. Global Health Priorities - priorities of the wealthy? *Glob Health* [Internet]. 2005 [cited 2022 May 14];1(1):6. Available from: <http://globalizationandhealth.biomedcentral.com/articles/10.1186/1744-8603-1-6>
15. Romero Y, Trapani D, Johnson S, Tittenbrun Z, Given L, Hohman K, et al. National cancer control plans: a global analysis. *Lancet Oncol* [Internet]. 2018 Oct 1;19(10):e546–55. Available from: <https://www.sciencedirect.com/science/article/pii/S1470204518306818>
16. World Health Organisation. National Cancer Control Programmes. Policies and managerial guidelines. 2nd Edition. 2002.
17. Walter F, Webster A, Scott S, Emery J. The Andersen Model of Total Patient Delay: A Systematic Review of Its Application in Cancer Diagnosis. *J Health Serv Res Policy* [Internet]. 2012 Apr [cited 2021 Dec 26];17(2):110–8. Available from: <http://journals.sagepub.com/doi/10.1258/jhsrp.2011.010113>
18. Shah B, Krishnan N, Kodish SR, Yenokyan G, Fatema K, Burhan Uddin K, et al. Applying the Three Delays Model to understand emergency care seeking and delivery in rural Bangladesh: a qualitative study. *BMJ Open* [Internet]. 2020 Dec [cited 2021 Dec 26];10(12):e042690. Available from: <https://bmjopen.bmj.com/lookup/doi/10.1136/bmjopen-2020-042690>
19. Serbanescu F, Goodwin MM, Binzen S, Morof D, Asimwe AR, Kelly L, et al. Addressing the First Delay in Saving Mothers, Giving Life Districts in Uganda and Zambia: Approaches and Results for Increasing Demand for Facility Delivery Services. *Glob Health Sci Pract* [Internet]. 2019 Mar 11 [cited 2021 Dec 26];7(Supplement 1):S48–67. Available from: <http://www.ghspjournal.org/lookup/doi/10.9745/GHSP-D-18-00343>
20. Thaddeus S, Maine D. Too far to walk: Maternal mortality in context. *Soc Sci Med* [Internet]. 1994 Apr 1;38(8):1091–110. Available from: <https://www.sciencedirect.com/science/article/pii/0277953694902267>
21. Covidence. Covidence [Internet]. Available from: <https://app.covidence.org>
22. ROBINS-E Development Group (Higgins J, Morgan R, Rooney A, Taylor K, Thayer K, Silva R, Lemeris C, Akl A, Arroyave W, Bateson T, Berkman N, Demers P, Forastiere F, Glenn B, Hróbjartsson A, Kirrane E, LaKind J, Luben T, Lunn R, McAleenan A, McGuinness L, Meerpohl J, Mehta S, Nachman R, Obbagy J, O'Connor A, Radke E, Savović J, Schubauer-Berigan M, Schwingl P, Schunemann H, Shea B, Steenland K, Stewart T, Straif K, Tilling K, Verbeek V, Vermeulen R, Viswanathan M, Zahm S, Sterne J). Risk Of Bias In Non-randomized Studies - of Exposure (ROBINS-E). Launch version, 1 June 2022. Available from: <https://www.riskofbias.info/welcome/robins-e-tool#h.trqnh6qozyhl>
23. Anyanwu SN, Egwuonwu OA, Ihekwoaba EC. Acceptance and adherence to treatment among breast cancer patients in Eastern Nigeria. *Breast*. 2011;20 Suppl 2:S51-3.
24. Herbst CL, Miot JK, Moch SL, Ruff P. Access to colorectal cancer (CRC) chemotherapy and the associated costs in a South African public healthcare patient cohort. *J Cancer Policy* [Internet]. 2018;15((Herbst C.-L., candicelee.herbst@gmail.com; Miot J.K., Jacqui.Miot@wits.ac.za; Moch S.L., Shirra.Moch@wits.ac.za) Division of Pharmacology, Department of Pharmacy and Pharmacology, Faculty of Health Sciences, University of the Witwatersrand, 7 York Road,):18–24. Available from: <https://www.embase.com/search/results?subaction=viewrecord&id=L619562724&from=export>
25. Reibold CF, Tariku W, Eber-Schulz P, Getachew S, Addisie A, Unverzagt S, et al. Adherence to Newly Implemented Tamoxifen Therapy for Breast Cancer Patients in Rural Western Ethiopia. *Breast Care* [Internet]. 2021;((Reibold C.F.; Eber-Schulz P.; Vetter M.; Thomssen C.; Kantelhardt E.J., eva.kantelhardt@uk-halle.de) Department of Gynecology, Martin-Luther-University Halle-Wittenberg,

- Halle (Saale), Germany(Tariku W.) Ethiopian Evangelical Church of Mekane Yesus EECMY). Available from:  
<https://www.embase.com/search/results?subaction=viewrecord&id=L634013409&from=export>
26. Joffe M, Ayeni O, Norris SA, McCormack VA, Ruff P, Das I, et al. Barriers to early presentation of breast cancer among women in Soweto, South Africa. *PLoS ONE* [Internet]. 2018;13(2). Available from: <https://www.embase.com/search/results?subaction=viewrecord&id=L620429115&from=export>
27. Schleimer LE, Vianney Dusengimana JM, Butonzi J, Kigonya C, Natarajan A, Umwizerwa A, et al. Barriers to timely surgery for breast cancer in Rwanda. *Surg U S* [Internet]. 2019;166(6):1188–95. Available from:  
<https://www.embase.com/search/results?subaction=viewrecord&id=L2002699082&from=export>
28. Martin AN, Kaneza KM, Kulkarni A, Mugenzi P, Ghebre R, Ntirushwa D, et al. Cancer Control at the District Hospital Level in Sub-Saharan Africa: An Educational and Resource Needs Assessment of General Practitioners. *J Glob Oncol*. 2019;5:1–8.
29. Nakaganda A, Solt K, Kwagonza L, Driscoll D, Kampi R, Orem J. Challenges faced by cancer patients in Uganda: Implications for health systems strengthening in resource limited settings. *J Cancer Policy* [Internet]. 2021;27((Nakaganda A., annet.nakaganda@uci.or.ug; Kampi R.; Orem J.) Uganda Cancer Institute, P. O Box 3935, Kampala, Uganda(Solt K.; Driscoll D.) American Cancer Society, 250 Williams St., Atlanta, GA, United States(Kwagonza L.) Ministry of Health, Uganda, P.O B). Available from: <https://www.embase.com/search/results?subaction=viewrecord&id=L2010247673&from=export>
30. Ajah L, Ezeome IV, Umeh UA, Aniebue UU, Nwankwo TO. Complementary and alternative medicine. Use and challenges among gynaecological cancer patients in Nigeria: Experiences in a tertiary health institution - Preliminary results. *Eur J Gynaecol Oncol* [Internet]. 2019;40(1):101–5. Available from: <https://www.embase.com/search/results?subaction=viewrecord&id=L2002101625&from=export>
31. Mapanga W, Norris SA, Chen WC, Blanchard C, Graham A, Baldwin-Ragaven L, et al. Consensus study on the health system and patient-related barriers for lung cancer management in South Africa. *PLoS ONE* [Internet]. 2021;16(2 February). Available from:  
<https://www.embase.com/search/results?subaction=viewrecord&id=L2011046361&from=export>
32. Oladeji A, Atalabi O, Jimoh M, Ntekim I, Elumelu T. Delay in presentation of cancer patients for diagnosis and management: An institutional report. *Internet J Oncol* [Internet]. 2017;13(1). Available from: <https://www.embase.com/search/results?subaction=viewrecord&id=L614940472&from=export>
33. Rayne S, Schnippel K, Kruger D, Benn CA, Firnhaber C. Delay to diagnosis and breast cancer stage in an urban south african breast clinic. *S Afr Med J* [Internet]. 2019;109(3):159–63. Available from: <https://www.embase.com/search/results?subaction=viewrecord&id=L2001617790&from=export>
34. Gebremariam A, Assefa M, Addissie A, Worku A, Dereje N, Abreha A, et al. Delayed initiation of adjuvant chemotherapy among women with breast cancer in Addis Ababa, Ethiopia. *Breast Cancer Res Treat* [Internet]. 2021;((Gebremariam A., alemg25@gmail.com) Department of Public Health, College of Medicine and Health Sciences, Adigrat University, Tigray, Adigrat, Ethiopia(Gebremariam A., alemg25@gmail.com; Addissie A.; Worku A.; Dereje N.) Department of Preventive Medicine,). Available from:  
<https://www.embase.com/search/results?subaction=viewrecord&id=L2010531904&from=export>
35. Otieno ES, Micheni JN, Kimende SK, Mutai KK. Delayed presentation of breast cancer patients. *East Afr Med J* [Internet]. 2010;87(4):147–50. Available from:  
<https://www.embase.com/search/results?subaction=viewrecord&id=L366363929&from=export>

- 1  
2  
3  
4  
5  
6  
7  
8  
9  
10  
11  
12  
13  
14  
15  
16  
17  
18  
19  
20  
21  
22  
23  
24  
25  
26  
27  
28  
29  
30  
31  
32  
33  
34  
35  
36  
37  
38  
39  
40  
41  
42  
43  
44  
45  
46  
47  
48  
49  
50  
51  
52  
53  
54  
55  
56  
57  
58  
59  
60
36. Ukwenya AY, Yusufu LMD, Nmadu PT, Garba ES, Ahmed A. Delayed treatment of symptomatic breast cancer: The experience from Kaduna, Nigeria. *S Afr J Surg* [Internet]. 2008;46(4):106–11. Available from: <https://www.embase.com/search/results?subaction=viewrecord&id=L352683097&from=export>
  37. Pace LE, Mpunga T, Hategekimana V, Dusengimana JMV, Habineza H, Bigirimana JB, et al. Delays in breast cancer presentation and diagnosis at two rural cancer referral centers in Rwanda. *Oncologist* [Internet]. 2015;20(7):780–8. Available from: <https://www.embase.com/search/results?subaction=viewrecord&id=L605124301&from=export>
  38. Ezeome ER. Delays in presentation and treatment of breast cancer in Enugu, Nigeria. *Niger J Clin Pract* [Internet]. 2010;13(3):311–6. Available from: <https://www.embase.com/search/results?subaction=viewrecord&id=L359540342&from=export>
  39. Jedy-Agba E, McCormack V, Olaomi O, Badejo W, Yilkudi M, Yawe T, et al. Determinants of stage at diagnosis of breast cancer in Nigerian women: sociodemographic, breast cancer awareness, health care access and clinical factors. *Cancer Causes Control* [Internet]. 2017;28(7):685–97. Available from: <https://www.embase.com/search/results?subaction=viewrecord&id=L615772850&from=export>
  40. Foerster M, McKenzie F, Zietsman A, Galukande M, Anele A, Adisa C, et al. Dissecting the journey to breast cancer diagnosis in sub-Saharan Africa: Findings from the multicountry ABC-DO cohort study. *Int J Cancer* [Internet]. 2021;148(2):340–51. Available from: <https://www.embase.com/search/results?subaction=viewrecord&id=L2005754565&from=export>
  41. Yang K, Msami K, Calixte R, Mwaiselage J, Dorn J, Soliman AS. Educational Opportunities for Down-Staging Breast Cancer in Low-Income Countries: an Example from Tanzania. *J Cancer Educ Off J Am Assoc Cancer Educ* [Internet]. 2019;34(6):1225–30. Available from: <https://www.embase.com/search/results?subaction=viewrecord&id=L629125676&from=export>
  42. Olarewaju SO, Oyekunle EO, Bamiro AO. Effect of sociodemographic variables on patient and diagnostic delay of breast cancer at the foremost health care institution in Nigeria. *J Glob Oncol* [Internet]. 2019;2019(5). Available from: <https://www.embase.com/search/results?subaction=viewrecord&id=L2002420094&from=export>
  43. Low DH, Phipps W, Orem J, Casper C, Bender Ignacio RA. Engagement in HIV Care and Access to Cancer Treatment Among Patients With HIV-Associated Malignancies in Uganda. *J Glob Oncol*. 2019;5:1–8.
  44. Dereje N, Addissie A, Worku A, Assefa M, Abraha A, Tigeneh W, et al. Extent and predictors of delays in diagnosis of cervical cancer in Addis Ababa, Ethiopia: A population-based prospective study. *J Glob Oncol* [Internet]. 2020;6((Dereje N., neba.jahovy@gmail.com) School of Public Health, Wachemo University, Hosanna, Ethiopia(Dereje N., jahovy@gmail.com; Addissie A.; Worku A.) Department of Preventive Medicine, School of Public Health, Addis Ababa University, Addis Ababa, Eth):277–84. Available from: <https://www.embase.com/search/results?subaction=viewrecord&id=L2005526468&from=export>
  45. Dereje N, Gebremariam A, Addissie A, Worku A, Assefa M, Abraha A, et al. Factors associated with advanced stage at diagnosis of cervical cancer in Addis Ababa, Ethiopia: A population-based study. *BMJ Open* [Internet]. 2020;10(10). Available from: <https://www.embase.com/search/results?subaction=viewrecord&id=L633090395&from=export>
  46. Zeleke S, Anley M, Kefale D, Wassihun B. Factors associated with delayed diagnosis of cervical cancer in tikur anbesa specialized hospital, Ethiopia, 2019: Cross-sectional study. *Cancer Manag Res* [Internet]. 2021;13((Zeleke S., shegawzn@gmail.com; Kefale D.) Department of Nursing, College of Health Sciences, Debre Tabor University, Debre Tabor, Ethiopia(Anley M.) Department of Oncology Nursing,

- Tikur Anbesa Specialized Hospital, Addis Ababa, Ethiopia(Wassihun B.) Dep):579–85. Available from: <https://www.embase.com/search/results?subaction=viewrecord&id=L2005940643&from=export>
47. Long C, Titus Ngwa Tagang E, Popat RA, Lawong EK, Brown JA, Wren SM. Factors associated with delays to surgical presentation in North-West Cameroon. *Surg U S* [Internet]. 2015;158(3):756–63. Available from: <https://www.embase.com/search/results?subaction=viewrecord&id=L604786739&from=export>
48. Brinton L, Figueroa J, Adjei E, Ansong D, Biritwum R, Edusei L, et al. Factors contributing to delays in diagnosis of breast cancers in Ghana, West Africa. *Breast Cancer Res Treat* [Internet]. 2017;162(1):105–14. Available from: <https://www.embase.com/search/results?subaction=viewrecord&id=L613880893&from=export>
49. Fasunla AJ, Ogunkeyede SA. Factors contributing to poor management outcome of sinonasal malignancies in South-west Nigeria. *Ghana Med J* [Internet]. 2013;47(1):10–5. Available from: <https://www.embase.com/search/results?subaction=viewrecord&id=L563019178&from=export>
50. Anakwenze C, Bhatia R, Rate W, Bakwenabatsile L, Ngoni K, Rayne S, et al. Factors related to advanced stage of cancer presentation in Botswana. *J Glob Oncol* [Internet]. 2018;2018(4). Available from: <https://www.embase.com/search/results?subaction=viewrecord&id=L2001734256&from=export>
51. Čačala SR, Gilart J. Factors relating to late presentation of patients with breast cancer in area 2 KwaZulu-Natal, South Africa. *J Glob Oncol* [Internet]. 2017;3(5):497–501. Available from: <https://www.embase.com/search/results?subaction=viewrecord&id=L2010115669&from=export>
52. Subramanian S, Gakunga R, Jones M, Kinyanjui A, Ochieng' E, Gikaara N, et al. Financial barriers related to breast cancer screening and treatment: A cross-sectional survey of women in Kenya. *J Cancer Policy* [Internet]. 2019;22((Subramanian S., ssubramanian@rti.org; Jones M., madeleinejones@rti.org) RTI International, Nairobi, United States(Gakunga R., robaigakunga@yahoo.com) Independent Research Scientist, Nairobi, Kenya(Kinyanjui A., asaphkinyanjui@kehpc.org; Gikaara N., ngik). Available from: <https://www.embase.com/search/results?subaction=viewrecord&id=L2003928016&from=export>
53. Moodley J, Cairncross L, Naiker T, Constant D. From symptom discovery to treatment - women's pathways to breast cancer care: A cross-sectional study. *BMC Cancer* [Internet]. 2018;18(1). Available from: <https://www.embase.com/search/results?subaction=viewrecord&id=L621323103&from=export>
54. Knapp GC, Tansley G, Olasehinde O, Wuraola F, Adisa A, Arowolo O, et al. Geospatial access predicts cancer stage at presentation and outcomes for patients with breast cancer in southwest Nigeria: A population-based study. *Cancer* [Internet]. 2020;((Knapp G.C., knappg@pm.me) Department of Surgery, Division of General Surgery, Dalhousie University, Halifax, NS, Canada(Tansley G.) Department of Medicine, Division of Critical Care, University of British Columbia, Vancouver, BC, Canada(Olasehinde O.; Wu). Available from: <https://www.embase.com/search/results?subaction=viewrecord&id=L2007682644&from=export>
55. Togawa K, Anderson BO, Foerster M, Galukande M, Zietsman A, Pontac J, et al. Geospatial barriers to healthcare access for breast cancer diagnosis in sub-Saharan African settings: The African Breast Cancer—Disparities in Outcomes Cohort Study. *Int J Cancer* [Internet]. 2020;((Togawa K., togawak@iarc.fr; Foerster M.; McKenzie F.; Schüz J.; McCormack V.) Section of Environment and Radiation, International Agency for Research on Cancer, Lyon, France(Anderson B.O.) Division of Public Health Sciences, Fred Hutchinson Cancer Resear). Available from: <https://www.embase.com/search/results?subaction=viewrecord&id=L2007544642&from=export>
56. Tapera O, Dreyer G, Kadzatsa W, Nyakabau AM, Stray-Pedersen B, Sjh H. Health system constraints affecting treatment and care among women with cervical cancer in Harare, Zimbabwe. *BMC Health*

Serv Res [Internet]. 2019;19(1):829. Available from:

<https://www.embase.com/search/results?subaction=viewrecord&id=L629847430&from=export>

57. Grosse Frie K, Kamaté B, Traoré CB, Coulibaly B, Mallé B, Kantelhardt EJ. Health system organisation and patient pathways: breast care patients' trajectories and medical doctors' practice in Mali. *BMC Public Health* [Internet]. 2019;19(1):204. Available from:  
<https://www.embase.com/search/results?subaction=viewrecord&id=L626442404&from=export>
58. Alatise OI, Fischer SE, Ayandipo OO, Omisore AG, Olatoke SA, Kingham TP. Health-seeking behavior and barriers to care in patients with rectal bleeding in Nigeria. *J Glob Oncol* [Internet]. 2017;3(6):749–56. Available from:  
<https://www.embase.com/search/results?subaction=viewrecord&id=L2010115698&from=export>
59. Martei YM, Grover S, Bilker WB, Monare B, Setlhako DI, Ralefala TB, et al. Impact of Essential Medicine Stock Outs on Cancer Therapy Delivery in a Resource-Limited Setting. *J Glob Oncol*. 2019;5:1–11.
60. Agodirin O, Olatoke S, Rahman G, Olaogun J, Kolawole O, Agboola J, et al. Impact of Primary Care Delay on Progression of Breast Cancer in a Black African Population: A Multicentered Survey. *J Cancer Epidemiol* [Internet]. 2019;2019((Agodirin O., cancer1992@yahoo.com; Olatoke S., samuelolatoke@yahoo.co.uk; Agboola J., owoade14@gmail.com) Department of Surgery, University of Ilorin, University of Ilorin Teaching Hospital, Nigeria(Rahman G., garahman1@yahoo.com) Department of Surgery,). Available from:  
<https://www.embase.com/search/results?subaction=viewrecord&id=L628975950&from=export>
61. Foerster M, Anderson BO, McKenzie F, Galukande M, Anele A, Adisa C, et al. Inequities in breast cancer treatment in sub-Saharan Africa: Findings from a prospective multi-country observational study. *Breast Cancer Res* [Internet]. 2019;21(1). Available from:  
<https://www.embase.com/search/results?subaction=viewrecord&id=L628886115&from=export>
62. Leng J, Ntekim AI, Ibraheem A, Anakwenze CP, Golden DW, Olopade OI. Infrastructural challenges lead to delay of curative radiotherapy in Nigeria. *J Glob Oncol* [Internet]. 2020;6((Leng J.) University of Chicago, Pritzker School of Medicine, Chicago, IL, United States(Ntekim A.I.) Department of Radiation Oncology, College of Medicine, University of Ibadan, Ibadan, Nigeria(Ibraheem A.) Department of Medicine, University of Chicago,):269–76. Available from:  
<https://www.embase.com/search/results?subaction=viewrecord&id=L2005526469&from=export>
63. Tesfaw A, Getachew S, Addissie A, Jemal A, Wienke A, Taylor L, et al. Late-Stage Diagnosis and Associated Factors Among Breast Cancer Patients in South and Southwest Ethiopia: A Multicenter Study. *Clin Breast Cancer* [Internet]. 2021;21(1):e112–9. Available from:  
<https://www.embase.com/search/results?subaction=viewrecord&id=L2008397755&from=export>
64. Mlange R, Matovelo D, Rambau P, Kidenya B. Patient and disease characteristics associated with late tumour stage at presentation of cervical cancer in northwestern Tanzania. *BMC Womens Health* [Internet]. 2016;16(1). Available from:  
<https://www.embase.com/search/results?subaction=viewrecord&id=L607880845&from=export>
65. Tesfaw A, Demis S, Munye T, Ashuro Z. Patient delay and contributing factors among breast cancer patients at two cancer referral centres in Ethiopia: A cross-sectional study. *J Multidiscip Healthc* [Internet]. 2020;13((Tefaw A., aragesfa05@gmail.com) Department of Public Health, Debre Tabor University, College of Health Sciences, Debre Tabor, Ethiopia(Demis S.) Department of Pediatrics and neonatal Nursing, Debre Tabor University, College of Health Sciences, Debre T):1391–401. Available from: <https://www.embase.com/search/results?subaction=viewrecord&id=L2005384806&from=export>

66. Page CM, Ibrahim S, Park LP, Huchko MJ. Patient factors affecting successful linkage to treatment in a cervical cancer prevention program in Kenya: A prospective cohort study. *PLoS ONE* [Internet]. 2019;14(9). Available from: <https://www.embase.com/search/results?subaction=viewrecord&id=L2002929519&from=export>
67. Bhatia RK, Rayne S, Rate W, Bakwenabatsile L, Monare B, Anakwenze C, et al. Patient Factors Associated With Delays in Obtaining Cancer Care in Botswana. *J Glob Oncol*. 2018;4:1–13.
68. Ibrahim A, Rasch V, Pukkala E, Aro AR. Predictors of cervical cancer being at an advanced stage at diagnosis in Sudan. *Int J Womens Health* [Internet]. 2011;3(1):385–9. Available from: <https://www.embase.com/search/results?subaction=viewrecord&id=L363132886&from=export>
69. Wambalaba FW, Son B, Wambalaba AE, Nyong'o D, Nyong'o A. Prevalence and Capacity of Cancer Diagnostics and Treatment: A Demand and Supply Survey of Health-Care Facilities in Kenya. *Cancer Control* [Internet]. 2019;26(1). Available from: <https://www.embase.com/search/results?subaction=viewrecord&id=L2003824743&from=export>
70. Awofeso O, Roberts AA, Salako O, Balogun L, Okediji P. Prevalence and Pattern of Late-Stage Presentation in Women with Breast and Cervical Cancers in Lagos University Teaching Hospital, Nigeria. *Niger Med J*. 2018;59(6):74–9.
71. Ntirenganya F, Petroze RT, Kamara TB, Groen RS, Kushner AL, Kyamanywa P, et al. Prevalence of breast masses and barriers to care: Results from a population-based survey in Rwanda and Sierra Leone. *J Surg Oncol* [Internet]. 2014;110(8):903–6. Available from: <https://www.embase.com/search/results?subaction=viewrecord&id=L53283925&from=export>
72. De Boer C, Niyonzima N, Orem J, Bartlett J, Zafar SY. Prognosis and delay of diagnosis among Kaposi's sarcoma patients in Uganda: A cross-sectional study. *Infect Agent Cancer* [Internet]. 2014;9(1). Available from: <https://www.embase.com/search/results?subaction=viewrecord&id=L53142060&from=export>
73. Mwaka AD, Garimoi CO, Were EM, Roland M, Wabinga H, Lyratzopoulos G. Social, demographic and healthcare factors associated with stage at diagnosis of cervical cancer: cross-sectional study in a tertiary hospital in Northern Uganda. *BMJ Open*. 2016;6(1):e007690.
74. Tadesse SK. Socio-economic and cultural vulnerabilities to cervical cancer and challenges faced by patients attending care at Tikur Anbessa Hospital: A cross sectional and qualitative study. *BMC Womens Health* [Internet]. 2015;15(1). Available from: <https://www.embase.com/search/results?subaction=viewrecord&id=L606015107&from=export>
75. Dickens C, Joffe M, Jacobson J, Venter F, Schüz J, Cubasch H, et al. Stage at breast cancer diagnosis and distance from diagnostic hospital in a periurban setting: A South African public hospital case series of over 1,000 women. *Int J Cancer* [Internet]. 2014;135(9):2173–82. Available from: <https://www.embase.com/search/results?subaction=viewrecord&id=L53094928&from=export>
76. Swanson M, Nakalembe M, Chen LM, Ueda S, Namugga J, Nakisige C, et al. Surgical candidacy and treatment initiation among women with cervical cancer at public referral hospitals in Kampala, Uganda: A descriptive cohort study. *BMJ Open* [Internet]. 2020;10(12). Available from: <https://www.embase.com/search/results?subaction=viewrecord&id=L633652979&from=export>
77. Clegg-Lampsey J, Dakubo J, Attobra YN. Why do breast cancer patients report late or abscond during treatment in Ghana? A pilot study. *Ghana Med J*. 2009;43(3):127–31.
78. Agodirin O, Olatoke S, Rahman G, Olaogun J, Olasehinde O, Katung A, et al. Presentation intervals and the impact of delay on breast cancer progression in a black African population. *BMC Public Health*

[Internet]. 2020;20(1):962. Available from:

<https://www.embase.com/search/results?subaction=viewrecord&id=L632140419&from=export>

79. Martins T, Merriel SWD, Hamilton W. Routes to diagnosis of symptomatic cancer in sub-Saharan Africa: systematic review. *BMJ Open* [Internet]. 2020 Nov [cited 2023 Jan 23];10(11):e038605. Available from: <https://bmjopen.bmj.com/lookup/doi/10.1136/bmjopen-2020-038605>
80. Nyirenda T, Bockarie M, Machingaidze S, Nderu M, Singh M, Fakier N, et al. Strengthening capacity for clinical research in sub-Saharan Africa: partnerships and networks. *Int J Infect Dis* [Internet]. 2021 Sep [cited 2022 May 15];110:54–61. Available from: <https://linkinghub.elsevier.com/retrieve/pii/S120197122100549X>
81. Graef KM, Okoye I, Ohene Oti NO, Dent J, Odedina FT. Operational Strategies for Clinical Trials in Africa. *JCO Glob Oncol* [Internet]. 2020 Nov [cited 2022 May 15];(6):973–82. Available from: <https://ascopubs.org/doi/10.1200/JGO.19.00204>
82. The-Nature-of-and-Motive-for-Academic-Research-in-Higher-Edu.ris.
83. Mutapi F. Africa should set its own research agenda [Internet]. *World view*. 2019 [cited 2022 Apr 10]. Available from: <https://www.nature.com/articles/d41586-019-03627-9>
84. McCormack V, Newton R. Research priorities for social inequalities in cancer in sub-Saharan Africa. [Internet]. International Agency for Research on Cancer; 2019. Available from: <https://www.ncbi.nlm.nih.gov/books/NBK566204>
85. Fundytus A, Sengar M, Lombe D, Hopman W, Jalink M, Gyawali B, et al. Access to cancer medicines deemed essential by oncologists in 82 countries: an international, cross-sectional survey. *Lancet Oncol* [Internet]. 2021 Oct [cited 2021 Dec 27];22(10):1367–77. Available from: <https://linkinghub.elsevier.com/retrieve/pii/S1470204521004630>

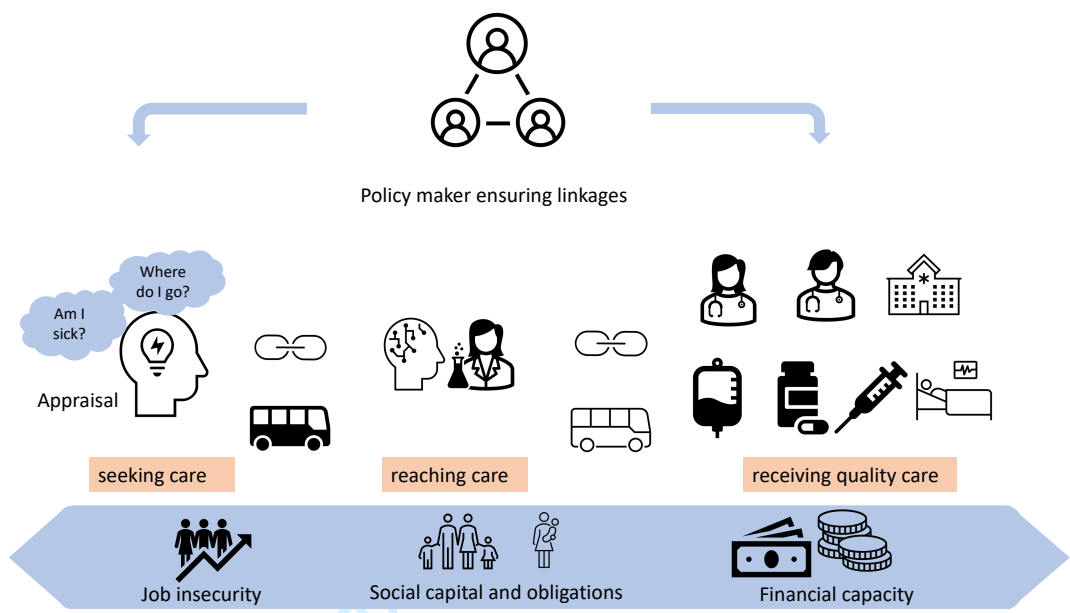

Figure 1: Three Delays Framework



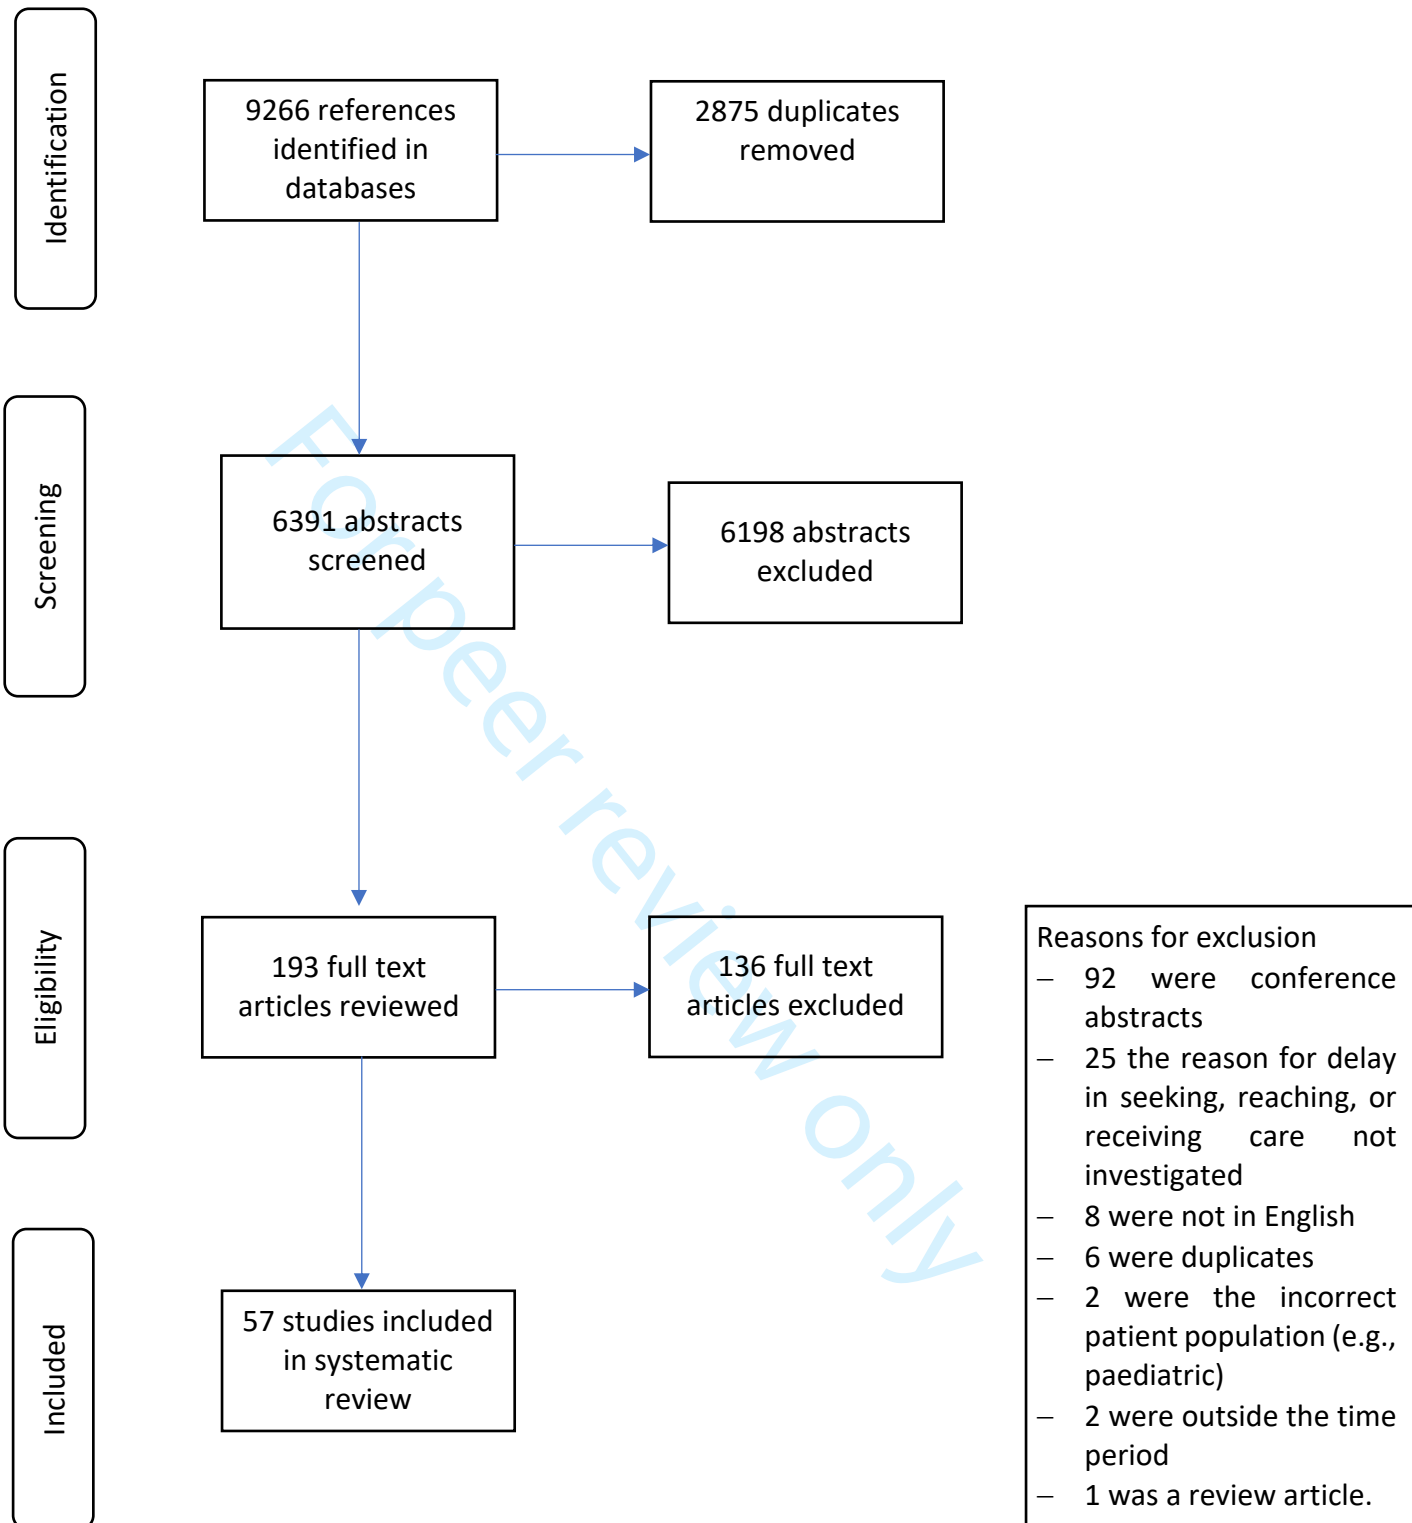

Figure 2. Flowchart of study selection as per Preferred Reporting Items for Systematic Reviews and Meta-Analyses (PRISMA) guidance

| Study            | Risk of bias domains |    |    |    |    |    |    | Overall |
|------------------|----------------------|----|----|----|----|----|----|---------|
|                  | D1                   | D2 | D3 | D4 | D5 | D6 | D7 |         |
| Gebremariam 2021 | -                    | +  | -  | X  | X  | +  | -  | X       |
| Zelege 2021      | X                    | +  | -  | -  | X  | +  | -  | X       |
| Tesfaw 2020      | X                    | X  | !  | +  | -  | +  | -  | !       |
| Knapp 2020       | X                    | X  | -  | +  | X  | +  | -  | !       |
| Schleimer 2019   | X                    | +  | !  | -  | X  | +  | -  | !       |
| Martei 2019      | X                    | +  | X  | +  | !  | X  | -  | !       |
| Dickens 2014     | X                    | X  | -  | -  | X  | +  | -  | !       |
| DeBoer 2014      | X                    | -  | -  | -  | X  | -  | -  | X       |
| Ibrahim 2011     | -                    | !  | -  | +  | X  | -  | -  | !       |
| Anyanwu 2011     | X                    | X  | -  | -  | X  | +  | -  | !       |
| Page 2019        | X                    | +  | -  | +  | X  | +  | -  | X       |
| Foerster 2019    | -                    | +  | +  | +  | -  | +  | -  | X       |
| Cacala 2017      | X                    | -  | -  | +  | X  | +  | -  | X       |
| Jedy-Agba 2017   | -                    | -  | !  | -  | -  | +  | -  | !       |

Domains:  
D1: Bias due to confounding.  
D2: Bias arising from measurement of the exposure.  
D3: Bias in selection of participants into the study (or into the analysis).  
D4: Bias due to post-exposure interventions.  
D5: Bias due to missing data.  
D6: Bias arising from measurement of the outcome.  
D7: Bias in selection of the reported result.

Judgement  
! Very high  
X High  
- Some concerns  
+ Low

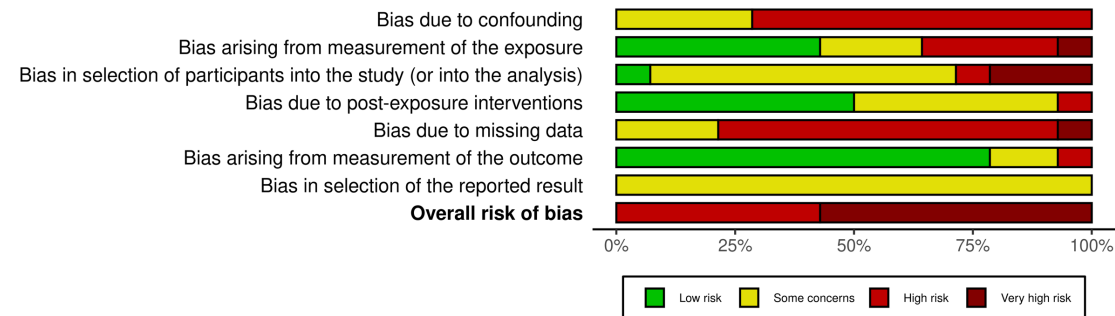

Figure 3. Quality assessment of studies , n= 14.

McGuinness, LA, Higgins, JPT. Risk-of-bias VISualization (robvis): An R package and Shiny web app for visualizing risk-of-bias assessments. Res Syn Meth. 2020; 1- 7. <https://doi.org/10.1002/jrsm.1411>

## Appendix 1. Search Strategy

| <b>Systematic review</b>                |                                                                                                                                                                                                                                                                                                                                                                                                                                                                                                                                                                                                                                                                                                                                                                                                                                                                                                                                                                                                 |
|-----------------------------------------|-------------------------------------------------------------------------------------------------------------------------------------------------------------------------------------------------------------------------------------------------------------------------------------------------------------------------------------------------------------------------------------------------------------------------------------------------------------------------------------------------------------------------------------------------------------------------------------------------------------------------------------------------------------------------------------------------------------------------------------------------------------------------------------------------------------------------------------------------------------------------------------------------------------------------------------------------------------------------------------------------|
| <b>Databases</b>                        |                                                                                                                                                                                                                                                                                                                                                                                                                                                                                                                                                                                                                                                                                                                                                                                                                                                                                                                                                                                                 |
|                                         | PubMed                                                                                                                                                                                                                                                                                                                                                                                                                                                                                                                                                                                                                                                                                                                                                                                                                                                                                                                                                                                          |
| <b>Search terms</b>                     |                                                                                                                                                                                                                                                                                                                                                                                                                                                                                                                                                                                                                                                                                                                                                                                                                                                                                                                                                                                                 |
| Search terms                            | Synonyms                                                                                                                                                                                                                                                                                                                                                                                                                                                                                                                                                                                                                                                                                                                                                                                                                                                                                                                                                                                        |
| 1. Cancer<br>ti,ab                      | cancer OR tumour OR tumor OR neopla* OR malignan* OR carcinoma                                                                                                                                                                                                                                                                                                                                                                                                                                                                                                                                                                                                                                                                                                                                                                                                                                                                                                                                  |
| 2. Delay<br>ti, ab                      | barrier* OR delay* OR access OR late OR interval                                                                                                                                                                                                                                                                                                                                                                                                                                                                                                                                                                                                                                                                                                                                                                                                                                                                                                                                                |
| 3. Diagnosis and<br>treatment<br>ti, ab | diagnos* OR presentation OR intervention OR referral OR consult* OR treatment OR therap*                                                                                                                                                                                                                                                                                                                                                                                                                                                                                                                                                                                                                                                                                                                                                                                                                                                                                                        |
| 4. countries<br>ti,ab                   | angola OR benin OR botswana OR burkina faso OR burundi OR cameroon OR cameron OR cape verde OR cabo verde OR central african republic OR ubangi shari OR chad OR comoros OR comoro islands OR iles comores OR congo brazzaville OR congo democratic republic OR democratic republic of congo OR congo OR zaire OR cote d ivoire OR cote divoire OR ivory coast OR djibouti OR french somaliland OR equatorial guinea OR eritrea OR ethiopia OR gabon OR Gabonese republic OR gambia OR ghana OR gold coast OR guinea OR guinea bissau OR kenya OR lesotho OR basutoland OR liberia OR madagascar OR malagasy OR malawi OR nyasaland OR mali OR mauritania OR mauritius OR mozambique OR namibia OR niger OR nigeria OR réunion OR rwanda OR Ruanda OR sao tome OR principe OR senegal OR seychelles OR sierra leone OR somalia OR south africa OR south sudan OR sudan OR swaziland OR tanzania OR tanganyika OR togo OR togolese republic OR uganda OR zambia OR zimbabwe OR africa OR african |
| 5. Qualitative search<br>terms          | qualitative* OR narrative* OR interview* OR focus group* OR grounded theory*                                                                                                                                                                                                                                                                                                                                                                                                                                                                                                                                                                                                                                                                                                                                                                                                                                                                                                                    |

| Systematic review                       |                                                                                                                                                                                                                                                                                                                                                                                                                                                                                                                                                                                                                                                                                                                                                                                                                                                                                                                                                                                                                                                                                                                                                                                                                                                                                                                                                                                                                                                                                                                                                                      |
|-----------------------------------------|----------------------------------------------------------------------------------------------------------------------------------------------------------------------------------------------------------------------------------------------------------------------------------------------------------------------------------------------------------------------------------------------------------------------------------------------------------------------------------------------------------------------------------------------------------------------------------------------------------------------------------------------------------------------------------------------------------------------------------------------------------------------------------------------------------------------------------------------------------------------------------------------------------------------------------------------------------------------------------------------------------------------------------------------------------------------------------------------------------------------------------------------------------------------------------------------------------------------------------------------------------------------------------------------------------------------------------------------------------------------------------------------------------------------------------------------------------------------------------------------------------------------------------------------------------------------|
| Databases                               | EMBASE                                                                                                                                                                                                                                                                                                                                                                                                                                                                                                                                                                                                                                                                                                                                                                                                                                                                                                                                                                                                                                                                                                                                                                                                                                                                                                                                                                                                                                                                                                                                                               |
| Search terms                            | Synonyms                                                                                                                                                                                                                                                                                                                                                                                                                                                                                                                                                                                                                                                                                                                                                                                                                                                                                                                                                                                                                                                                                                                                                                                                                                                                                                                                                                                                                                                                                                                                                             |
| 1. Cancer<br>ti,ab                      | cancer:ti,ab OR tumour:ti,ab OR tumor:ti,ab OR neopla*:ti,ab<br>OR malignan*:ti,ab OR carcinoma:ti,ab                                                                                                                                                                                                                                                                                                                                                                                                                                                                                                                                                                                                                                                                                                                                                                                                                                                                                                                                                                                                                                                                                                                                                                                                                                                                                                                                                                                                                                                                |
| 2. Delay                                | barrier*:ti,ab OR delay*:ti,ab OR access:ti,ab OR late:ti,ab OR<br>interval:ti,ab                                                                                                                                                                                                                                                                                                                                                                                                                                                                                                                                                                                                                                                                                                                                                                                                                                                                                                                                                                                                                                                                                                                                                                                                                                                                                                                                                                                                                                                                                    |
| 3. Diagnosis and<br>treatment<br>ti, ab | diagnos*:ti,ab OR presentation:ti,ab OR intervention:ti,ab<br>OR referral:ti,ab OR consult*:ti,ab OR treatment:ti,ab OR<br>therap*:ti,ab                                                                                                                                                                                                                                                                                                                                                                                                                                                                                                                                                                                                                                                                                                                                                                                                                                                                                                                                                                                                                                                                                                                                                                                                                                                                                                                                                                                                                             |
| 4. Sub-Saharan Africa<br>ti, ab         | angola:ti,ab OR benin:ti,ab OR botswana:ti,ab OR 'burkina<br>faso':ti,ab OR burundi:ti,ab OR cameroon:ti,ab OR<br>cameron:ti,ab OR 'cape verde':ti,ab OR 'cabo verde':ti,ab OR<br>'central african republic':ti,ab OR 'ubangi shari':ti,ab OR<br>chad:ti,ab OR comoros:ti,ab OR 'comoro islands':ti,ab OR<br>'iles comores':ti,ab OR 'congo brazzaville':ti,ab OR 'congo<br>democratic republic':ti,ab OR 'democratic republic<br>congo':ti,ab OR congo:ti,ab OR zaire:ti,ab OR 'cote<br>divoire':ti,ab OR 'cote d ivoire':ti,ab OR 'ivory coast':ti,ab OR<br>djibouti:ti,ab OR 'french somaliland':ti,ab OR 'equatorial<br>guinea':ti,ab OR eritrea:ti,ab OR ethiopia:ti,ab OR gabon:ti,ab<br>OR 'gabonese republic':ti,ab OR gambia:ti,ab OR ghana:ti,ab<br>OR 'gold coast':ti,ab OR guinea:ti,ab OR 'guinea bissau':ti,ab<br>OR kenya:ti,ab OR lesotho:ti,ab OR basutoland:ti,ab OR<br>liberia:ti,ab OR madagascar:ti,ab OR malagasy:ti,ab OR<br>malawi:ti,ab OR nyasaland:ti,ab OR mali:ti,ab OR<br>mauritania:ti,ab OR mauritius:ti,ab OR mozambique:ti,ab OR<br>namibia:ti,ab OR niger:ti,ab OR nigeria:ti,ab OR réunion:ti,ab<br>OR rwanda:ti,ab OR ruanda:ti,ab OR 'sao tome':ti,ab OR<br>'principe':ti,ab OR senegal:ti,ab OR seychelles:ti,ab OR<br>'sierra leone':ti,ab OR somalia:ti,ab OR 'south africa':ti,ab OR<br>'south sudan':ti,ab OR sudan:ti,ab OR swaziland:ti,ab OR<br>tanzania:ti,ab OR tanganyika:ti,ab OR togo:ti,ab OR 'togolese<br>republic':ti,ab OR uganda:ti,ab OR zambia:ti,ab OR<br>zimbabwe:ti,ab OR africa:ti,ab OR african:ti,ab |
| 5. Qualitative search<br>terms          | qualitative*:ti,ab OR narrative*:ti,ab OR interview*:ti,ab OR<br>focus group*:ti,ab OR grounded theory*:ti,ab                                                                                                                                                                                                                                                                                                                                                                                                                                                                                                                                                                                                                                                                                                                                                                                                                                                                                                                                                                                                                                                                                                                                                                                                                                                                                                                                                                                                                                                        |



1  
2  
3  
4  
5  
6  
7  
8  
9  
10  
11  
12  
13  
14  
15  
16  
17  
18  
19  
20  
21  
22  
23  
24  
25  
26  
27  
28  
29  
30  
31  
32  
33  
34  
35  
36  
37  
38  
39  
40  
41  
42  
43  
44  
45  
46

| Study ID | Author | Title | Year | Country | Design | Population | Intervention | Comparison | Outcomes | Quality | Notes |
|----------|--------|-------|------|---------|--------|------------|--------------|------------|----------|---------|-------|
| 1        | ...    | ...   | ...  | ...     | ...    | ...        | ...          | ...        | ...      | ...     | ...   |
| 2        | ...    | ...   | ...  | ...     | ...    | ...        | ...          | ...        | ...      | ...     | ...   |
| 3        | ...    | ...   | ...  | ...     | ...    | ...        | ...          | ...        | ...      | ...     | ...   |
| 4        | ...    | ...   | ...  | ...     | ...    | ...        | ...          | ...        | ...      | ...     | ...   |
| 5        | ...    | ...   | ...  | ...     | ...    | ...        | ...          | ...        | ...      | ...     | ...   |
| 6        | ...    | ...   | ...  | ...     | ...    | ...        | ...          | ...        | ...      | ...     | ...   |
| 7        | ...    | ...   | ...  | ...     | ...    | ...        | ...          | ...        | ...      | ...     | ...   |
| 8        | ...    | ...   | ...  | ...     | ...    | ...        | ...          | ...        | ...      | ...     | ...   |
| 9        | ...    | ...   | ...  | ...     | ...    | ...        | ...          | ...        | ...      | ...     | ...   |
| 10       | ...    | ...   | ...  | ...     | ...    | ...        | ...          | ...        | ...      | ...     | ...   |
| 11       | ...    | ...   | ...  | ...     | ...    | ...        | ...          | ...        | ...      | ...     | ...   |
| 12       | ...    | ...   | ...  | ...     | ...    | ...        | ...          | ...        | ...      | ...     | ...   |
| 13       | ...    | ...   | ...  | ...     | ...    | ...        | ...          | ...        | ...      | ...     | ...   |
| 14       | ...    | ...   | ...  | ...     | ...    | ...        | ...          | ...        | ...      | ...     | ...   |
| 15       | ...    | ...   | ...  | ...     | ...    | ...        | ...          | ...        | ...      | ...     | ...   |
| 16       | ...    | ...   | ...  | ...     | ...    | ...        | ...          | ...        | ...      | ...     | ...   |
| 17       | ...    | ...   | ...  | ...     | ...    | ...        | ...          | ...        | ...      | ...     | ...   |
| 18       | ...    | ...   | ...  | ...     | ...    | ...        | ...          | ...        | ...      | ...     | ...   |
| 19       | ...    | ...   | ...  | ...     | ...    | ...        | ...          | ...        | ...      | ...     | ...   |
| 20       | ...    | ...   | ...  | ...     | ...    | ...        | ...          | ...        | ...      | ...     | ...   |
| 21       | ...    | ...   | ...  | ...     | ...    | ...        | ...          | ...        | ...      | ...     | ...   |
| 22       | ...    | ...   | ...  | ...     | ...    | ...        | ...          | ...        | ...      | ...     | ...   |
| 23       | ...    | ...   | ...  | ...     | ...    | ...        | ...          | ...        | ...      | ...     | ...   |
| 24       | ...    | ...   | ...  | ...     | ...    | ...        | ...          | ...        | ...      | ...     | ...   |
| 25       | ...    | ...   | ...  | ...     | ...    | ...        | ...          | ...        | ...      | ...     | ...   |
| 26       | ...    | ...   | ...  | ...     | ...    | ...        | ...          | ...        | ...      | ...     | ...   |
| 27       | ...    | ...   | ...  | ...     | ...    | ...        | ...          | ...        | ...      | ...     | ...   |
| 28       | ...    | ...   | ...  | ...     | ...    | ...        | ...          | ...        | ...      | ...     | ...   |
| 29       | ...    | ...   | ...  | ...     | ...    | ...        | ...          | ...        | ...      | ...     | ...   |
| 30       | ...    | ...   | ...  | ...     | ...    | ...        | ...          | ...        | ...      | ...     | ...   |
| 31       | ...    | ...   | ...  | ...     | ...    | ...        | ...          | ...        | ...      | ...     | ...   |
| 32       | ...    | ...   | ...  | ...     | ...    | ...        | ...          | ...        | ...      | ...     | ...   |
| 33       | ...    | ...   | ...  | ...     | ...    | ...        | ...          | ...        | ...      | ...     | ...   |
| 34       | ...    | ...   | ...  | ...     | ...    | ...        | ...          | ...        | ...      | ...     | ...   |
| 35       | ...    | ...   | ...  | ...     | ...    | ...        | ...          | ...        | ...      | ...     | ...   |
| 36       | ...    | ...   | ...  | ...     | ...    | ...        | ...          | ...        | ...      | ...     | ...   |
| 37       | ...    | ...   | ...  | ...     | ...    | ...        | ...          | ...        | ...      | ...     | ...   |
| 38       | ...    | ...   | ...  | ...     | ...    | ...        | ...          | ...        | ...      | ...     | ...   |
| 39       | ...    | ...   | ...  | ...     | ...    | ...        | ...          | ...        | ...      | ...     | ...   |
| 40       | ...    | ...   | ...  | ...     | ...    | ...        | ...          | ...        | ...      | ...     | ...   |
| 41       | ...    | ...   | ...  | ...     | ...    | ...        | ...          | ...        | ...      | ...     | ...   |
| 42       | ...    | ...   | ...  | ...     | ...    | ...        | ...          | ...        | ...      | ...     | ...   |
| 43       | ...    | ...   | ...  | ...     | ...    | ...        | ...          | ...        | ...      | ...     | ...   |
| 44       | ...    | ...   | ...  | ...     | ...    | ...        | ...          | ...        | ...      | ...     | ...   |
| 45       | ...    | ...   | ...  | ...     | ...    | ...        | ...          | ...        | ...      | ...     | ...   |
| 46       | ...    | ...   | ...  | ...     | ...    | ...        | ...          | ...        | ...      | ...     | ...   |

1  
2  
3  
4  
5  
6  
7  
8  
9  
10  
11  
12  
13  
14  
15  
16  
17  
18  
19  
20  
21  
22  
23  
24  
25  
26  
27  
28  
29  
30  
31  
32  
33  
34  
35  
36  
37  
38  
39  
40  
41  
42  
43  
44  
45  
46

| Study ID | Author | Year | Country | Region | Study Design | Population | Intervention | Comparison | Outcomes | Quality | Notes |
|----------|--------|------|---------|--------|--------------|------------|--------------|------------|----------|---------|-------|
| 1        | ...    | ...  | ...     | ...    | ...          | ...        | ...          | ...        | ...      | ...     | ...   |
| 2        | ...    | ...  | ...     | ...    | ...          | ...        | ...          | ...        | ...      | ...     | ...   |
| 3        | ...    | ...  | ...     | ...    | ...          | ...        | ...          | ...        | ...      | ...     | ...   |
| 4        | ...    | ...  | ...     | ...    | ...          | ...        | ...          | ...        | ...      | ...     | ...   |
| 5        | ...    | ...  | ...     | ...    | ...          | ...        | ...          | ...        | ...      | ...     | ...   |
| 6        | ...    | ...  | ...     | ...    | ...          | ...        | ...          | ...        | ...      | ...     | ...   |
| 7        | ...    | ...  | ...     | ...    | ...          | ...        | ...          | ...        | ...      | ...     | ...   |
| 8        | ...    | ...  | ...     | ...    | ...          | ...        | ...          | ...        | ...      | ...     | ...   |
| 9        | ...    | ...  | ...     | ...    | ...          | ...        | ...          | ...        | ...      | ...     | ...   |
| 10       | ...    | ...  | ...     | ...    | ...          | ...        | ...          | ...        | ...      | ...     | ...   |
| 11       | ...    | ...  | ...     | ...    | ...          | ...        | ...          | ...        | ...      | ...     | ...   |
| 12       | ...    | ...  | ...     | ...    | ...          | ...        | ...          | ...        | ...      | ...     | ...   |
| 13       | ...    | ...  | ...     | ...    | ...          | ...        | ...          | ...        | ...      | ...     | ...   |
| 14       | ...    | ...  | ...     | ...    | ...          | ...        | ...          | ...        | ...      | ...     | ...   |
| 15       | ...    | ...  | ...     | ...    | ...          | ...        | ...          | ...        | ...      | ...     | ...   |
| 16       | ...    | ...  | ...     | ...    | ...          | ...        | ...          | ...        | ...      | ...     | ...   |
| 17       | ...    | ...  | ...     | ...    | ...          | ...        | ...          | ...        | ...      | ...     | ...   |
| 18       | ...    | ...  | ...     | ...    | ...          | ...        | ...          | ...        | ...      | ...     | ...   |
| 19       | ...    | ...  | ...     | ...    | ...          | ...        | ...          | ...        | ...      | ...     | ...   |
| 20       | ...    | ...  | ...     | ...    | ...          | ...        | ...          | ...        | ...      | ...     | ...   |
| 21       | ...    | ...  | ...     | ...    | ...          | ...        | ...          | ...        | ...      | ...     | ...   |
| 22       | ...    | ...  | ...     | ...    | ...          | ...        | ...          | ...        | ...      | ...     | ...   |
| 23       | ...    | ...  | ...     | ...    | ...          | ...        | ...          | ...        | ...      | ...     | ...   |
| 24       | ...    | ...  | ...     | ...    | ...          | ...        | ...          | ...        | ...      | ...     | ...   |
| 25       | ...    | ...  | ...     | ...    | ...          | ...        | ...          | ...        | ...      | ...     | ...   |
| 26       | ...    | ...  | ...     | ...    | ...          | ...        | ...          | ...        | ...      | ...     | ...   |
| 27       | ...    | ...  | ...     | ...    | ...          | ...        | ...          | ...        | ...      | ...     | ...   |
| 28       | ...    | ...  | ...     | ...    | ...          | ...        | ...          | ...        | ...      | ...     | ...   |
| 29       | ...    | ...  | ...     | ...    | ...          | ...        | ...          | ...        | ...      | ...     | ...   |
| 30       | ...    | ...  | ...     | ...    | ...          | ...        | ...          | ...        | ...      | ...     | ...   |
| 31       | ...    | ...  | ...     | ...    | ...          | ...        | ...          | ...        | ...      | ...     | ...   |
| 32       | ...    | ...  | ...     | ...    | ...          | ...        | ...          | ...        | ...      | ...     | ...   |
| 33       | ...    | ...  | ...     | ...    | ...          | ...        | ...          | ...        | ...      | ...     | ...   |
| 34       | ...    | ...  | ...     | ...    | ...          | ...        | ...          | ...        | ...      | ...     | ...   |
| 35       | ...    | ...  | ...     | ...    | ...          | ...        | ...          | ...        | ...      | ...     | ...   |
| 36       | ...    | ...  | ...     | ...    | ...          | ...        | ...          | ...        | ...      | ...     | ...   |
| 37       | ...    | ...  | ...     | ...    | ...          | ...        | ...          | ...        | ...      | ...     | ...   |
| 38       | ...    | ...  | ...     | ...    | ...          | ...        | ...          | ...        | ...      | ...     | ...   |
| 39       | ...    | ...  | ...     | ...    | ...          | ...        | ...          | ...        | ...      | ...     | ...   |
| 40       | ...    | ...  | ...     | ...    | ...          | ...        | ...          | ...        | ...      | ...     | ...   |
| 41       | ...    | ...  | ...     | ...    | ...          | ...        | ...          | ...        | ...      | ...     | ...   |
| 42       | ...    | ...  | ...     | ...    | ...          | ...        | ...          | ...        | ...      | ...     | ...   |
| 43       | ...    | ...  | ...     | ...    | ...          | ...        | ...          | ...        | ...      | ...     | ...   |
| 44       | ...    | ...  | ...     | ...    | ...          | ...        | ...          | ...        | ...      | ...     | ...   |
| 45       | ...    | ...  | ...     | ...    | ...          | ...        | ...          | ...        | ...      | ...     | ...   |
| 46       | ...    | ...  | ...     | ...    | ...          | ...        | ...          | ...        | ...      | ...     | ...   |

## Appendix 3. Exposures and Outcome for cohort studies

Table 1. Exposure-Outcome relationship for cohort studies

| Author           | Exposure                                                                           | Outcome                                                        |
|------------------|------------------------------------------------------------------------------------|----------------------------------------------------------------|
| Cacala 2017      | Breast Cancer pathway to diagnosis (symptom appraisal to presentation to clinic)   | Late presentation of Breast Cancer (T-stage)                   |
| De Boer 2014     | Kaposi's Sarcoma pathway to diagnosis                                              | Delay in diagnosis of Kaposi's Sarcoma (Poor outcomes)         |
| Dickens 2014     | Distance from diagnostic hospital to treatment center                              | Stage of breast cancer at diagnosis                            |
| Foerster 2019    | Breast Cancer Pathway to treatment                                                 | Receipt of treatment                                           |
| Gebremariam 2021 | Breast Cancer Care pathway to chemotherapy                                         | Time to initiation of chemotherapy                             |
| Ibrahim 2011     | Cervical cancer pathway to diagnosis (symptom appraisal to presentation to clinic) | Advanced stage disease                                         |
| Jedy-Agba 2017   | Breast Cancer Pathway to diagnosis                                                 | Stage at diagnosis                                             |
| Knapp 2020       | Geospatial access                                                                  | Cancer stage at diagnosis                                      |
| Martei 2019      | Chemotherapy stock out                                                             | Suboptimal therapy delivery                                    |
| Page 2019        | Positive HPV test                                                                  | Acceptance and adherence to diagnostic procedure and treatment |
| Schleimer 2019   | Pathway from diagnosis to surgery                                                  | Delay to appropriate operative treatment                       |
| Tesfaw 2020      | Breast Cancer diagnostic pathway; patient delay > 3 months                         | Advanced stage of cancer at diagnosis                          |
| Zelege 2021      | Cervical Cancer Diagnostic pathway                                                 | Stage IIIA-IVB presentation                                    |



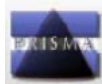

## PRISMA 2020 Checklist

1  
2  
3  
4  
5  
6  
7  
8  
9  
10  
11  
12  
13  
14  
15  
16  
17  
18  
19  
20  
21  
22  
23  
24  
25  
26  
27  
28  
29  
30  
31  
32  
33  
34  
35  
36  
37  
38  
39  
40  
41  
42  
43  
44  
45  
46  
47

| Section and Topic             | Item # | Checklist item                                                                                                                                                                                                                                                                                       | Location where item is reported |
|-------------------------------|--------|------------------------------------------------------------------------------------------------------------------------------------------------------------------------------------------------------------------------------------------------------------------------------------------------------|---------------------------------|
| <b>TITLE</b>                  |        |                                                                                                                                                                                                                                                                                                      |                                 |
| Title                         | 1      | Identify the report as a systematic review.                                                                                                                                                                                                                                                          | 1                               |
| <b>ABSTRACT</b>               |        |                                                                                                                                                                                                                                                                                                      |                                 |
| Abstract                      | 2      | See the PRISMA 2020 for Abstracts checklist.                                                                                                                                                                                                                                                         | 2                               |
| <b>INTRODUCTION</b>           |        |                                                                                                                                                                                                                                                                                                      |                                 |
| Rationale                     | 3      | Describe the rationale for the review in the context of existing knowledge.                                                                                                                                                                                                                          | 4                               |
| Objectives                    | 4      | Provide an explicit statement of the objective(s) or question(s) the review addresses.                                                                                                                                                                                                               | 5,6                             |
| <b>METHODS</b>                |        |                                                                                                                                                                                                                                                                                                      |                                 |
| Eligibility criteria          | 5      | Specify the inclusion and exclusion criteria for the review and how studies were grouped for the syntheses.                                                                                                                                                                                          | 6                               |
| Information sources           | 6      | Specify all databases, registers, websites, organisations, reference lists and other sources searched or consulted to identify studies. Specify the date when each source was last searched or consulted.                                                                                            | 6                               |
| Search strategy               | 7      | Present the full search strategies for all databases, registers and websites, including any filters and limits used.                                                                                                                                                                                 | Appendix 1                      |
| Selection process             | 8      | Specify the methods used to decide whether a study met the inclusion criteria of the review, including how many reviewers screened each record and each report retrieved, whether they worked independently, and if applicable, details of automation tools used in the process.                     | 6                               |
| Data collection process       | 9      | Specify the methods used to collect data from reports, including how many reviewers collected data from each report, whether they worked independently, any processes for obtaining or confirming data from study investigators, and if applicable, details of automation tools used in the process. | 6                               |
| Data items                    | 10a    | List and define all outcomes for which data were sought. Specify whether all results that were compatible with each outcome domain in each study were sought (e.g. for all measures, time points, analyses), and if not, the methods used to decide which results to collect.                        | Appendix 2                      |
|                               | 10b    | List and define all other variables for which data were sought (e.g. participant and intervention characteristics, funding sources). Describe any assumptions made about any missing or unclear information.                                                                                         | Appendix 2                      |
| Study risk of bias assessment | 11     | Specify the methods used to assess risk of bias in the included studies, including details of the tool(s) used, how many reviewers assessed each study and whether they worked independently, and if applicable, details of automation tools used in the process.                                    | 6,7,8 Figure 3                  |
| Effect measures               | 12     | Specify for each outcome the effect measure(s) (e.g. risk ratio, mean difference) used in the synthesis or presentation of results.                                                                                                                                                                  | Appendix 2                      |
| Synthesis methods             | 13a    | Describe the processes used to decide which studies were eligible for each synthesis (e.g. tabulating the study intervention characteristics and comparing against the planned groups for each synthesis (item #5)).                                                                                 | n/a                             |
|                               | 13b    | Describe any methods required to prepare the data for presentation or synthesis, such as handling of missing summary statistics, or data conversions.                                                                                                                                                | n/a                             |
|                               | 13c    | Describe any methods used to tabulate or visually display results of individual studies and syntheses.                                                                                                                                                                                               | n/a                             |
|                               | 13d    | Describe any methods used to synthesize results and provide a rationale for the choice(s). If meta-analysis was performed, describe the model(s), method(s) to identify the presence and extent of statistical heterogeneity, and software package(s) used.                                          | n/a                             |
|                               | 13e    | Describe any methods used to explore possible causes of heterogeneity among study results (e.g. subgroup analysis, meta-regression).                                                                                                                                                                 | n/a                             |
|                               | 13f    | Describe any sensitivity analyses conducted to assess robustness of the synthesized results.                                                                                                                                                                                                         | n/a                             |
| Reporting bias assessment     | 14     | Describe any methods used to assess risk of bias due to missing results in a synthesis (arising from reporting biases).                                                                                                                                                                              | 6,7,8 Figure 3                  |
| Certainty assessment          | 15     | Describe any methods used to assess certainty (or confidence) in the body of evidence for an outcome.                                                                                                                                                                                                | n/a                             |

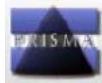

## PRISMA 2020 Checklist

1  
2  
3  
4  
5  
6  
7  
8  
9  
10  
11  
12  
13  
14  
15  
16  
17  
18  
19  
20  
21  
22  
23  
24  
25  
26  
27  
28  
29  
30  
31  
32  
33  
34  
35  
36  
37  
38  
39  
40  
41  
42  
43  
44  
45  
46  
47

| Section and Topic                              | Item # | Checklist item                                                                                                                                                                                                                                                                       | Location where item is reported |
|------------------------------------------------|--------|--------------------------------------------------------------------------------------------------------------------------------------------------------------------------------------------------------------------------------------------------------------------------------------|---------------------------------|
| <b>RESULTS</b>                                 |        |                                                                                                                                                                                                                                                                                      |                                 |
| Study selection                                | 16a    | Describe the results of the search and selection process, from the number of records identified in the search to the number of studies included in the review, ideally using a flow diagram.                                                                                         | 7                               |
|                                                | 16b    | Cite studies that might appear to meet the inclusion criteria, but which were excluded, and explain why they were excluded.                                                                                                                                                          | Figure 2                        |
| Study characteristics                          | 17     | Cite each included study and present its characteristics.                                                                                                                                                                                                                            | 7, Appendix 2                   |
| Risk of bias in studies                        | 18     | Present assessments of risk of bias for each included study.                                                                                                                                                                                                                         | Figure 3                        |
| Results of individual studies                  | 19     | For all outcomes, present, for each study: (a) summary statistics for each group (where appropriate) and (b) an effect estimate and its precision (e.g. confidence/credible interval), ideally using structured tables or plots.                                                     | Appendix 2                      |
| Results of syntheses                           | 20a    | For each synthesis, briefly summarise the characteristics and risk of bias among contributing studies.                                                                                                                                                                               | n/a                             |
|                                                | 20b    | Present results of all statistical syntheses conducted. If meta-analysis was done, present for each the summary estimate and its precision (e.g. confidence/credible interval) and measures of statistical heterogeneity. If comparing groups, describe the direction of the effect. | n/a                             |
|                                                | 20c    | Present results of all investigations of possible causes of heterogeneity among study results.                                                                                                                                                                                       | n/a                             |
|                                                | 20d    | Present results of all sensitivity analyses conducted to assess the robustness of the synthesized results.                                                                                                                                                                           | n/a                             |
| Reporting biases                               | 21     | Present assessments of risk of bias due to missing results (arising from reporting biases) for each synthesis assessed.                                                                                                                                                              | Figure 3                        |
| Certainty of evidence                          | 22     | Present assessments of certainty (or confidence) in the body of evidence for each outcome assessed.                                                                                                                                                                                  | n/a                             |
| <b>DISCUSSION</b>                              |        |                                                                                                                                                                                                                                                                                      |                                 |
| Discussion                                     | 23a    | Provide a general interpretation of the results in the context of other evidence.                                                                                                                                                                                                    | 16,17,18                        |
|                                                | 23b    | Discuss any limitations of the evidence included in the review.                                                                                                                                                                                                                      | 18                              |
|                                                | 23c    | Discuss any limitations of the review processes used.                                                                                                                                                                                                                                | n/a                             |
|                                                | 23d    | Discuss implications of the results for practice, policy, and future research.                                                                                                                                                                                                       | 18                              |
| <b>OTHER INFORMATION</b>                       |        |                                                                                                                                                                                                                                                                                      |                                 |
| Registration and protocol                      | 24a    | Provide registration information for the review, including register name and registration number, or state that the review was not registered.                                                                                                                                       | n/a                             |
|                                                | 24b    | Indicate where the review protocol can be accessed, or state that a protocol was not prepared.                                                                                                                                                                                       | Notprepared                     |
|                                                | 24c    | Describe and explain any amendments to information provided at registration or in the protocol.                                                                                                                                                                                      | n/a                             |
| Support                                        | 25     | Describe sources of financial or non-financial support for the review, and the role of the funders or sponsors in the review.                                                                                                                                                        | 19                              |
| Competing interests                            | 26     | Declare any competing interests of review authors.                                                                                                                                                                                                                                   | 19                              |
| Availability of data, code and other materials | 27     | Report which of the following are publicly available and where they can be found: template data collection forms; data extracted from included studies; data used for all analyses; analytic code; any other materials used in the review.                                           | 19                              |

From: Page MJ, McKenzie JE, Bossuyt PM, Boutron I, Hoffmann TC, Mulrow CD, et al. The PRISMA 2020 statement: an updated guideline for reporting systematic reviews. *BMJ* 2021;372:n71. doi: 10.1136/bmj.n71

For peer review only - <http://bmjopen.bmj.com/site/about/guidelines.xhtml>

For more information, visit: <http://www.prisma-statement.org/>

# BMJ Open

## Delays in seeking, reaching and access to quality cancer care in sub-Saharan Africa: a systematic review

|                                 |                                                                                                                                                                                                                                                                                                                                                                                                                                                                                                                                                                                                                                                                                                                                                                                                                                                              |
|---------------------------------|--------------------------------------------------------------------------------------------------------------------------------------------------------------------------------------------------------------------------------------------------------------------------------------------------------------------------------------------------------------------------------------------------------------------------------------------------------------------------------------------------------------------------------------------------------------------------------------------------------------------------------------------------------------------------------------------------------------------------------------------------------------------------------------------------------------------------------------------------------------|
| Journal:                        | <i>BMJ Open</i>                                                                                                                                                                                                                                                                                                                                                                                                                                                                                                                                                                                                                                                                                                                                                                                                                                              |
| Manuscript ID                   | bmjopen-2022-067715.R2                                                                                                                                                                                                                                                                                                                                                                                                                                                                                                                                                                                                                                                                                                                                                                                                                                       |
| Article Type:                   | Original research                                                                                                                                                                                                                                                                                                                                                                                                                                                                                                                                                                                                                                                                                                                                                                                                                                            |
| Date Submitted by the Author:   | 08-Mar-2023                                                                                                                                                                                                                                                                                                                                                                                                                                                                                                                                                                                                                                                                                                                                                                                                                                                  |
| Complete List of Authors:       | Lombe, Dorothy; Te Whatu Ora Health NZ MidCentral, Radiation Oncology<br>Mwamba, Monde; ZAMBART<br>Msadabwe, Susan; Cancer Diseases Hospital<br>Bond, Virginia ; London School of Hygiene & Tropical Medicine and ZAMBART, Social Science<br>Simwinga, Musonda; Zambart<br>Ssemata, Andrew Sentoogo; The Medical Research Council/ Uganda Virus Research Institute and London School of Hygiene & Tropical Medicine (MRC/UVRI & LSHTM) Uganda Research Unit<br>Muhumuza, Richard; The Medical Research Council/ Uganda Virus Research Institute and London School of Hygiene & Tropical Medicine (MRC/UVRI & LSHTM) Uganda Research Unit<br>Seeley, Janet; London School of Hygiene and Tropical Medicine, Department of Global Health &Development<br>Mwaka, Amos; Makerere University CHS, Department of Medicine<br>Aggarwal, Ajay; King's College London |
| <b>Primary Subject Heading</b>: | Health policy                                                                                                                                                                                                                                                                                                                                                                                                                                                                                                                                                                                                                                                                                                                                                                                                                                                |
| Secondary Subject Heading:      | Global health                                                                                                                                                                                                                                                                                                                                                                                                                                                                                                                                                                                                                                                                                                                                                                                                                                                |
| Keywords:                       | Adult oncology < ONCOLOGY, Urological tumours < ONCOLOGY, PUBLIC HEALTH, Health policy < HEALTH SERVICES ADMINISTRATION & MANAGEMENT                                                                                                                                                                                                                                                                                                                                                                                                                                                                                                                                                                                                                                                                                                                         |
|                                 |                                                                                                                                                                                                                                                                                                                                                                                                                                                                                                                                                                                                                                                                                                                                                                                                                                                              |

SCHOLARONE™  
Manuscripts



I, the Submitting Author has the right to grant and does grant on behalf of all authors of the Work (as defined in the below author licence), an exclusive licence and/or a non-exclusive licence for contributions from authors who are: i) UK Crown employees; ii) where BMJ has agreed a CC-BY licence shall apply, and/or iii) in accordance with the terms applicable for US Federal Government officers or employees acting as part of their official duties; on a worldwide, perpetual, irrevocable, royalty-free basis to BMJ Publishing Group Ltd ("BMJ") its licensees and where the relevant Journal is co-owned by BMJ to the co-owners of the Journal, to publish the Work in this journal and any other BMJ products and to exploit all rights, as set out in our [licence](#).

The Submitting Author accepts and understands that any supply made under these terms is made by BMJ to the Submitting Author unless you are acting as an employee on behalf of your employer or a postgraduate student of an affiliated institution which is paying any applicable article publishing charge ("APC") for Open Access articles. Where the Submitting Author wishes to make the Work available on an Open Access basis (and intends to pay the relevant APC), the terms of reuse of such Open Access shall be governed by a Creative Commons licence – details of these licences and which [Creative Commons](#) licence will apply to this Work are set out in our licence referred to above.

Other than as permitted in any relevant BMJ Author's Self Archiving Policies, I confirm this Work has not been accepted for publication elsewhere, is not being considered for publication elsewhere and does not duplicate material already published. I confirm all authors consent to publication of this Work and authorise the granting of this licence.

1  
2  
3 **Delays in seeking, reaching and access to quality cancer care in sub-Saharan Africa: a**  
4 **systematic review**  
5

6  
7 Dorothy Chilambe Lombe<sup>1</sup>

8 Monde Mwamba<sup>2</sup>

9 Susan Msadabwe<sup>3</sup>

10 Virginia Bond<sup>2,4</sup>

11 Musonda Simwinga<sup>2</sup>

12 Andrew Sentoogo Ssemata<sup>5</sup>

13 Richard Muhumuza<sup>5</sup>

14 Janet Seeley<sup>4,5</sup>

15 Amos Deogratius Mwaka<sup>6</sup>

16 Ajay Aggarwal<sup>4,7</sup>  
17  
18  
19

20 <sup>1</sup>Cancer Screening, Treatment and Support MidCentral, New Zealand

21 <sup>2</sup>Zambart, School of Public Health, Ridgeway Campus, University of Zambia, Lusaka,  
22 Zambia

23 <sup>3</sup>Cancer Diseases Hospital, Lusaka, Zambia

24 <sup>4</sup>London School of Hygiene & Tropical Medicine (LSHTM), Keppel Street, London, UK

25 <sup>5</sup>The Medical Research Council/ Uganda Virus Research Institute and London School of  
26 Hygiene & Tropical Medicine (MRC/UVRU & LSHTM) Uganda Research Unit, P.O. Box 49,  
27 Entebbe, Uganda

28 <sup>6</sup>Department of Medicine, Faculty of Medicine, Gulu University, Gulu, Uganda

29 <sup>7</sup>Institute of Cancer Policy, King's College London, London, UK  
30  
31  
32

33 Correspondence to:

34 Dr Dorothy Chilambe Lombe

35 Postal address: Gate 2, Heretaunga Street, Private Bag 11036, Palmerston North 4442, New  
36 Zealand

37 Email: [dorothylombe@yahoo.com](mailto:dorothylombe@yahoo.com)  
38  
39

40  
41 Keywords: sub-Saharan Africa, cancer, delays, seeking care, diagnosis, treatment  
42

43 Word count: 3180  
44  
45  
46  
47  
48  
49  
50  
51  
52  
53  
54  
55  
56  
57  
58  
59  
60

## Abstract

**Objectives:** Late presentation and delays in diagnosis and treatment consistently translate into poor outcomes in sub-Saharan Africa (SSA). The aim of this study was to collate and appraise the factors influencing diagnostic and treatment delays of adult solid tumours in SSA.

**Design:** Systematic review with assessment of bias using Risk of Bias in Non- randomized Studies of Exposures (ROBINS-E) tool.

**Data sources:** PubMed and Embase, for publications from January 1995 to March 2021.

**Eligibility criteria:** Inclusion criteria: quantitative or mixed method research, publications in English, on solid cancers in SSA countries. Exclusion criteria: paediatric populations, haematologic malignancies, and assessments of public perceptions and awareness of cancer (since the focus was on patients with a cancer diagnosis and treatment pathways).

**Data extraction and synthesis:** Two reviewers extracted and validated the studies. Data included year of publication; country; demographic characteristics; country level setting; disease subsite; study design; type of delay, reasons for delay and primary outcomes.

**Results:** 57 out of 193 full text review were included. 40% were from Nigeria or Ethiopia. 70% focused on breast or cervical cancer. 43 studies had a high risk of bias at preliminary stages of quality assessment. 14 studies met the criteria for full assessment and all totaled to either high or very high risk of bias across 7 domains. Reasons for delays included high costs of diagnostic and treatment services; lack of coordination between primary, secondary and tertiary health care sectors; inadequate staffing; and continued reliance on traditional healers and complimentary medicines.

**Conclusions:** Robust research to inform policy on the barriers to quality cancer care in SSA is absent. The focus of most research is on breast and cervical cancers. Research outputs are from few countries. It is imperative that we investigate the complex interaction of these factors to build resilient and effective cancer control programs.

## Strengths and limitations of this study

- The study interrogated two layers of factors (context and delays) by considering the 'Three Delays' framework.
- We used the Risk of Bias in non- randomized Studies – of Exposures (ROBINS-E) tool to evaluate the quality of studies.
- We reduced heterogeneity by focusing on solid tumours, excluding awareness studies and restricting the timeframe to allow for applicability of findings to the evolving health care systems with time.
- The quality of the studies included was largely poor; however, rigorous assessment of risk of bias across seven domains allowed deduction of key study findings that are a useful steppingstone for further investigation.

## INTRODUCTION

The cancer control agenda has globally received a high level of political recognition.<sup>(1,2)</sup> In sub-Saharan Africa (SSA), with an age standardized incidence and mortality rate of 128.2 and 87.2 per 100 000 people respectively, cancer is becoming a leading public health problem.<sup>(3)</sup> There is growing emphasis that the successful translation of commitments to support cancer control policy into substantial reductions in cancer morbidity and mortality must occur on a locally adapted evidence-based platform but robust local research is lacking in contrast with developed nations.

Countries in SSA operate in an environment of low resources, which has resulted in cancer management largely focusing on those presenting with overt symptomatic disease.<sup>(4,5)</sup> The system level challenges are heterogenous across SSA but factors germane to all countries includes limited health care financing, inadequate financial protection (universal health coverage), inadequate infrastructure development as well as the need for health systems to manage a dual burden of infectious disease and growing non-communicable diseases.<sup>(5–8)</sup>

The lack of coordination and fragmented pathways in cancer care at all stages including prevention, symptom awareness, diagnosis, treatment and post treatment care makes cancer hard to manage in developing nations and ultimately result in high levels of premature mortality.<sup>(9)</sup> Interventions occur in silos within three distinct groups 1) across specific cancer types which are prioritized<sup>(10)</sup>; 2) across prevention, treatment, palliation<sup>(11)</sup>; 3) across primary, secondary and tertiary health care sectors<sup>(12)</sup>. Additionally, building strong system linkages to coordinate cancer care across primary, secondary and tertiary sectors within country are generally overlooked and this results in critical delays.<sup>(9)</sup>

Fragmented pathways of care and research priorities are also reflective of the dependence on external international financial donors which tend to support their own specific agendas perpetuating silos of development.<sup>(13,14)</sup> This approach can be considered reductionist as it fails to consider the system and structural drivers of inequalities in access to diagnosis and treatment.

Evaluation of the unique social, economic, geographic and cultural determinants for late diagnosis and poor treatment outcomes are imperative to provide locally generated evidence. This will ensure the effective implementation of national cancer control programs.<sup>(15,16)</sup> These factors are not just context specific (e.g., country, region) but also tumour specific. An array of factors including accessibility to care (distance and cost), quality of care, coordination of care across health care sectors, education and training, as well as intricate personal and community relationships (values, beliefs, socioeconomic parameters, gender) need to be interpreted in each situation and considered explicitly.

1  
2  
3 Empirical work has sought to identify the factors influencing cancer diagnosis and treatment  
4 delay.<sup>(17)</sup> However, to our knowledge there have been no attempts to synthesize the  
5 available evidence from primary quantitative research undertaken in the SSA context to  
6 inform cancer control policies and identify gaps in the current research literature. Gaps would  
7 include country settings, tumour types, or at-risk populations which remain under-  
8 researched. In addition, robust study designs need to be employed to help compare results  
9 between studies and provide further insights as part of the system evaluation.  
10  
11  
12  
13

14 In this review we used the 'Three Delays' framework to support the synthesis and  
15 classification of research studies focusing on barriers to diagnosis and treatment. The three  
16 delays framework has been used in other health conditions e.g. child and maternal health,  
17 emergency medicine however, to date it has not been applied to cancer care delivery.<sup>(18,19)</sup>  
18 The framework considers three contexts and three delays. The three contexts are the:  
19 Patient context (perceptions of disease, barriers to care, cost of illness); Provider context  
20 (care process quality and outcome evaluation, health care workers perceived system  
21 barriers); Community context (proximity and physical accessibility of services in the  
22 community). The three delays are: seeking care; reaching care; and receiving quality care<sup>(20)</sup>  
23 Delay 1 seeking care: This is the delay in recognizing illness and deciding to seek appropriate  
24 medical help outside the home. Delay 2 reaching care: This is the delay in reaching an  
25 appropriate health facility. Delay 3 receiving quality care: This is the delay in receiving quality  
26 care after reaching the health facility. The interconnection in the delays can be seen in Figure  
27 1.  
28  
29  
30  
31  
32  
33  
34  
35

36 The aim of this investigation was to identify common factors influencing diagnostic delays  
37 of adult solid tumours and highlight areas that require further study whether that be specific  
38 countries, tumour types or settings, in order to help target resources and inform  
39 interventions that reduce cancer survivorship disparities globally.  
40  
41  
42

## 43 **METHODS**

### 44 **Study design**

45 We undertook a systematic review and the findings are reported according to the  
46 guidelines of the Preferred Reporting Items for Systematic Reviews and Meta-Analyses  
47 (PRISMA). The study selection flowchart diagram is presented in Figure 2  
48  
49

### 50 **Search strategy**

51 The literature search was conducted on 8<sup>th</sup> March 2021 in PubMed and Embase for articles  
52 published between January 1995 and March 2021. We restricted the timeframe to allow for  
53 relevance and applicability of findings to the evolving health care systems with time. The  
54 full search strategy is in the supplementary material as Appendix 1  
55  
56  
57

### 58 **Eligibility criteria**



1  
2  
3 The study included published articles in the English language that focused on solid cancers.  
4 The primary research was focused on SSA countries. Types of studies included quantitative  
5 (surveys, observational studies) or studies using mixed methods research methodologies.  
6 The quantitative studies had to include patients who had received a diagnosis of cancer. We  
7 excluded studies that included paediatric populations, haematologic malignancies, as well  
8 assessments of public perceptions and awareness of cancer since the focus was on patients  
9 with a cancer diagnosis and treatment pathways. Haematological malignancies have been  
10 excluded because the pathways of referral, detection, management and prognosis are very  
11 different compared to solid organ malignancies and would require a separate evaluation.  
12  
13  
14

### 15 **Study selection**

16 Two reviewers (DL and MM) screened the abstracts and full text articles with a third reviewer  
17 (AA) to resolve any conflicts. We utilized the systematic review tool Covidence to screen,  
18 extract and validate data.(21)  
19  
20

### 21 **Data abstraction and synthesis**

22 The two primary reviewers extracted and validated the entries together before merging the  
23 outputs. Data extracted included year of article publication; country of study; demographic  
24 characteristics (age, gender, HIV status, education, marital status, employment, income  
25 level); country level setting; disease subsite; study design; type of delay investigated, reasons  
26 for delay and primary outcomes.  
27  
28

29  
30 Quality assessment was interrogated with ROBINS-E tool by DL and AA.(22)  
31

### 32 **Patient and public involvement**

33 None.  
34  
35

## 36 **RESULTS**

### 37 **Study characteristics**

38 An initial search identified 6391 articles of which 193 underwent full text review (Figure 2).  
39 Fifty-seven studies were included in our final sample and data extracted.(23–78) The full data  
40 extraction output is included in the supplementary material in Appendix 2.  
41  
42  
43

#### 44 *Country and setting profile*

45 The majority of studies were conducted in Nigeria, 15 (26%), Ethiopia, eight (14%) and South  
46 Africa, 7 (12%). Five (9%) were undertaken in Uganda, four (7%) in Kenya, and three (5%) in  
47 Rwanda. Four (7%) studies were carried out in more than one country. Only 9% (n=5) of the  
48 studies were carried out at national level. Of the remaining studies, two thirds were  
49 conducted at the hospital level (n=38) and a quarter (n=14) being conducted at regional level.  
50  
51  
52

#### 53 *Research design*

54 Two thirds of included studies used a cross sectional survey design. The rest of the studies  
55 included analysis of patient-level data collected retrospectively (23%) or prospectively (11%).  
56 Case control and Delphi studies represented 4% of studies.  
57  
58

#### 59 *Tumour types*

Breast cancer was the most studied tumour type for our research question (53%, n=29) followed by cervix (18%, n=10). 21% of studies (n=12) evaluated multiple tumour types whilst there were smaller studies on colorectal cancer (n=2) and Kaposi's sarcoma (n=1). There were no eligible studies on other high burden diseases in SSA such as prostate cancer and esophageal cancer identified in the literature.

### *Participant population*

Patients identified in a hospital setting were the target population in 48 out of 56 studies. In the other studies, the target populations were patients and clinicians (n=3), clinicians only (n=1), a combination of clinicians, public health opinion leaders and NGOs (n=1), patients in a community setting (n=2) and patients and health facility administrators (n=1)

### **Assessment of study quality**

Fourteen cohort studies met the eligibility for a full assessment. The scores across the domains are illustrated in Figure 3. The exposure and outcome characteristics are included in the supplemental material as Appendix 3. Two cohort studies did not require full interrogation as preliminary assessment of bias by asking the following three questions placed them in the very high-risk category i) Did the authors make any attempt to control for confounding? ii) Was the method of measuring exposure inappropriate? iii) Was the method of measuring the outcome inappropriate? The remaining 40 were surveys. However, all the studies provided valuable insights that we used in the narrative synthesis. A similar finding on data quality from this region has been highlighted before in a contemporary systematic on the routes to diagnosis of symptomatic cancer in SSA.<sup>(79)</sup> Figure 3 illustrates the different domains and proportions of bias across the studies. For the studies that were assessed comprehensively all of them had an overall judgement of high or very high risk of bias. In most studies the patient related confounders (age, marital status and socioeconomic status such as income and education level were collected as variables but not controlled for appropriately. Health systems factors were poorly accounted for in statistical analysis plans.

### **Three delays framework**

We synthesized the empirical studies into the three delay areas: seeking, reaching and receiving quality cancer care. 37% (n=21) of the studies investigated all 3 delays whilst 42% (n=24) focused on 2 delays and 21% (n=12) on 1 delay. Table 1 outlines the how the various studies addressed the components of the three delays framework.

**Table 1. Three delays framework distribution of studies**

| First author name | Year | Cancer type            | Country   | N   | Setting  | Design    | 3 delays |
|-------------------|------|------------------------|-----------|-----|----------|-----------|----------|
| Gebremariam(34)   | 2021 | Breast                 | Ethiopia  | 223 | Regional | Retrospec | C        |
| Zelege(46)        | 2021 | Cervical               | Ethiopia  | 410 | Hospital | Retrospec | A        |
| Mapanga(31)       | 2021 | Lung                   | S. Africa | 27  | Regional | Delphi    | A, B, C  |
| Nakaganda(29)     | 2020 | Multisite <sup>1</sup> | Uganda    | 359 | Hospital | Survey    | A, B, C  |
| Tesfaw(63)        | 2020 | Breast                 | Ethiopia  | 426 | Regional | Retrospec | A, C     |
| Tesfaw(65)        | 2020 | Breast                 | Ethiopia  | 371 | Regional | Survey    | A, C     |
| Reibold(25)       | 2020 | Breast                 | Ethiopia  | 51  | Hospital | Survey    | C        |
| Knapp(54)         | 2020 | Breast                 | Nigeria   | 609 | Hospital | Retrospec | A, B     |
| Leng(62)          | 2020 | Multisite <sup>2</sup> | Nigeria   | 186 | Hospital | Survey    | A, B, C  |

|    |                        |      |                              |                                           |      |          |                          |
|----|------------------------|------|------------------------------|-------------------------------------------|------|----------|--------------------------|
| 1  |                        |      |                              |                                           |      |          |                          |
| 2  |                        |      |                              |                                           |      |          |                          |
| 3  |                        |      |                              |                                           |      |          |                          |
| 4  | <b>Togawa(55)</b>      | 2020 | Breast                       | Namibia<br>Nigeria<br>Uganda<br>Zambia    | 1518 | Hospital | Survey<br>A,C            |
| 5  |                        |      |                              |                                           |      |          |                          |
| 6  |                        |      |                              |                                           |      |          |                          |
| 7  |                        |      |                              |                                           |      |          |                          |
| 8  |                        |      |                              |                                           |      |          |                          |
| 9  | <b>Swanson(76)</b>     | 2020 | cervical                     | Uganda                                    | 268  | Hospital | Survey<br>C              |
| 10 | <b>Foerster(40)</b>    | 2020 | Breast                       | Uganda,<br>Zambia,<br>Namibia,<br>Nigeria | 1429 | Hospital | Survey<br>A, B, C        |
| 11 |                        |      |                              |                                           |      |          |                          |
| 12 |                        |      |                              |                                           |      |          |                          |
| 13 |                        |      |                              |                                           |      |          |                          |
| 14 |                        |      |                              |                                           |      |          |                          |
| 15 | <b>Dereje(45)</b>      | 2020 | Cervical                     | Ethiopia                                  | 212  | Regional | Survey<br>A, C           |
| 16 |                        |      |                              |                                           |      |          |                          |
| 17 | <b>Dereje(44)</b>      | 2020 | Cervical                     | Ethiopia                                  | 231  | Regional | Survey<br>A, B           |
| 18 |                        |      |                              |                                           |      |          |                          |
| 19 |                        |      |                              |                                           |      |          |                          |
| 20 | <b>Agodirin(78)</b>    | 2020 | Breast                       | Nigeria                                   | 420  | Regional | Survey<br>A, B, C        |
| 21 |                        |      |                              |                                           |      |          |                          |
| 22 | <b>Martin(28)</b>      | 2019 | cancer type not<br>specified | Rwanda                                    | 73   | National | Survey<br>C              |
| 23 |                        |      |                              |                                           |      |          |                          |
| 24 |                        |      |                              |                                           |      |          |                          |
| 25 | <b>Page(66)</b>        | 2019 | cervical                     | Kenya                                     | 505  | Regional | Prospect<br>A,B          |
| 26 | <b>Low(43)</b>         | 2019 | Multisite <sup>3</sup>       | Uganda                                    | 100  | Hospital | Survey<br>A, B           |
| 27 | <b>Wambalaba(69)</b>   | 2019 | Multisite <sup>4</sup>       | Kenya                                     | 1048 | National | Retrospec<br>A, C        |
| 28 | <b>Grosse Frie(57)</b> | 2019 | Breast                       | Mali                                      | 124  | Regional | Survey<br>A, B, C        |
| 29 | <b>Yang(41)</b>        | 2019 | Breast                       | Tanzania                                  | 196  | Hospital | Survey<br>B              |
| 30 | <b>Schleimer(27)</b>   | 2019 | Breast                       | Rwanda                                    | 151  | Regional | Retrospec<br>A, B, C     |
| 31 | <b>Foerster(61)</b>    | 2019 | Breast                       | Uganda<br>Nigeria<br>Namibia              | 1335 | Hospital | Prospect<br>A, B, C      |
| 32 |                        |      |                              |                                           |      |          |                          |
| 33 |                        |      |                              |                                           |      |          |                          |
| 34 |                        |      |                              |                                           |      |          |                          |
| 35 | <b>Tapera(56)</b>      | 2019 | cervical                     | Zimbabwe                                  | 78   | Regional | Survey<br>A, B, C        |
| 36 | <b>Agodirin(60)</b>    | 2019 | Breast                       | Nigeria                                   | 237  | Regional | Survey<br>A, B, C        |
| 37 | <b>Rayne(33)</b>       | 2019 | Breast                       | S. Africa                                 | 252  | Hospital | Survey<br>A, B           |
| 38 | <b>Subramanian(52)</b> | 2019 | Breast                       | Kenya                                     | 800  | Regional | Survey<br>A, B, C        |
| 39 |                        |      |                              |                                           |      |          |                          |
| 40 | <b>Olarewaju(42)</b>   | 2019 | breast                       | Nigeria                                   | 275  | Hospital | Survey<br>A, B, C        |
| 41 | <b>Ajah(30)</b>        | 2019 | Multisite <sup>5</sup>       | Nigeria                                   | 95   | Hospital | Survey<br>A              |
| 42 | <b>Martei(59)</b>      | 2019 | Multisite <sup>6</sup>       | Botswana                                  | 286  | Hospital | Retrospec<br>A           |
| 43 | <b>Herbst(24)</b>      | 2018 | Colorectal                   | S. Africa                                 | 162  | Hospital | Retrospec<br>C           |
| 44 |                        |      |                              |                                           |      |          |                          |
| 45 | <b>Anakwenze(50)</b>   | 2018 | Multisite <sup>7</sup>       | Botswana                                  | 214  | Hospital | Survey<br>A, B           |
| 46 | <b>Moodley(53)</b>     | 2018 | Breast                       | S. Africa                                 | 201  | Hospital | Survey<br>A, B           |
| 47 |                        |      |                              |                                           |      |          |                          |
| 48 | <b>Joffe (26)</b>      | 2018 | Breast                       | S. Africa                                 | 499  | Hospital | Survey<br>A, B, C        |
| 49 |                        |      |                              |                                           |      |          |                          |
| 50 | <b>Awofeso(70)</b>     | 2018 | Breast, Cervical             | Nigeria                                   | 105  | Hospital | Survey<br>A, B, C        |
| 51 |                        |      |                              |                                           |      |          |                          |
| 52 | <b>Bhatia(67)</b>      | 2018 | Multisite <sup>8</sup>       | Botswana                                  | 214  | Hospital | Survey<br>A,B            |
| 53 | <b>Oladeji(32)</b>     | 2017 | Multisite <sup>9</sup>       | Nigeria                                   | 218  | Hospital | Survey<br>A, B, C        |
| 54 | <b>Jedy-Agba(39)</b>   | 2017 | Breast                       | Nigeria                                   | 316  | National | Case-<br>control<br>A, B |
| 55 |                        |      |                              |                                           |      |          |                          |
| 56 |                        |      |                              |                                           |      |          |                          |
| 57 | <b>Alatise(58)</b>     | 2017 | colorectal                   | Nigeria                                   | 127  | Hospital | Survey<br>A, B, C        |
| 58 | <b>Cacala(51)</b>      | 2017 | Breast                       | S. Africa                                 | 172  | Hospital | Prospect<br>A, B         |
| 59 |                        |      |                              |                                           |      |          |                          |
| 60 | <b>Brinton(48)</b>     | 2016 | Breast                       | Ghana                                     | 1184 | Regional | Survey<br>A, B           |

|                          |      |                         |                           |      |          |           |         |
|--------------------------|------|-------------------------|---------------------------|------|----------|-----------|---------|
| <b>Mlange(64)</b>        | 2016 | Cervical                | Tanzania                  | 202  | Hospital | Survey    | A, B    |
| <b>Mwaka(73)</b>         | 2015 | Cervical                | Uganda                    | 149  | Hospital | Survey    | A, B    |
| <b>Long(47)</b>          | 2015 | Multisite <sup>10</sup> | Cameroon                  | 220  | Hospital | Survey    | A, B, C |
| <b>Pace(37)</b>          | 2015 | Breast                  | Rwanda                    | 144  | National | Survey    | A, B, C |
| <b>Tadesse(74)</b>       | 2015 | cervical                | Ethiopia                  | 198  | Hospital | Survey    | B, C    |
| <b>Dickens(75)</b>       | 2014 | Breast                  | S. Africa                 | 1071 | Hospital | Retrospec | B       |
| <b>De Boer(72)</b>       | 2014 | K. Sarcoma              | Uganda                    | 161  | Hospital | Retrospec | A, B    |
| <b>Ntirenganya(71)</b>   | 2014 | Breast                  | Rwanda<br>Sierra<br>Leone | 6820 | National | Survey    | A, B    |
| <b>Fasunla(49)</b>       | 2013 | Sinonasal               | Nigeria                   | 61   | Hospital | Survey    | A, B, C |
| <b>Ibrahim(68)</b>       | 2011 | cervical                | Sudan                     | 197  | Hospital | Retrospec | B       |
| <b>Anyanwu(23)</b>       | 2011 | breast                  | Nigeria                   | 275  | Hospital | Retrospec | B, C    |
| <b>Otieno(35)</b>        | 2010 | Breast                  | Kenya                     | 166  | Hospital | Survey    | A, B, C |
| <b>Ezeome(38)</b>        | 2009 | Breast                  | Nigeria                   | 164  | Hospital | Survey    | A, B    |
| <b>Clegg-Lamprey(77)</b> | 2009 | breast                  | Ghana                     | 101  | Hospital | Survey    | A, B, C |
| <b>Ukwenya(36)</b>       | 2008 | Breast                  | Nigeria                   | 111  | Hospital | Survey    | A, B, C |

23 1 – Cervix, Kaposi's sarcoma, breast, prostate, esophagus; 2 – breast, cervical, head and neck, prostate; 3 – KS, cervical cancer, breast cancer, esophageal cancer, head  
 24 and neck cancer, non-Hodgkin lymphoma, vulvovaginal, prostate, conjunctival squam cell ca, penile, melanoma; 4 – Cervix, Breast, Esophagus, Prostate, Ovary, Colon,  
 25 Thyroid, Pancreatic, Lung, Liver; 5 – Cervical, ovarian, endometrial, vulva, choriocarcinoma, leiomyosarcoma; 6 – cervical, breast, prostate, esophageal, lung, uterine,  
 26 ovarian, colorectal, head and neck cancers, Kaposi sarcoma; 7 – Cervical, breast, head and neck, vulvar, Kaposi sarcoma, endometrial, penile, anal, esophageal,  
 27 lymphoma, prostate; 8 – Cervical, Breast, Head and neck, Vulvar, Kaposi's sarcoma, Endometrial, Penile, Anal, Oesophageal, Lymphoma, Prostate; 9 – Uterine cervix,  
 28 breast, head and neck, prostate, GIT; 10 – skin, breast, colorectal, gynecologic, anal; 3 delays codes A – seeking care; B – reaching care; C – receiving quality care; S.  
 Africa – South Africa; Retrospec – Retrospective; Prospect – Prospective; K. Sarcom – Kaposi Sarcoma; N – sample size.

The reasons of the delays amalgamated from the studies and identified as contributing to each type of systems delay are outlined in Table 2. They are further synthesized into economic, psychological, sociocultural, health services and geography subthemes and referenced appropriately in the text. The comprehensive output with outcomes of the data extraction is included as Appendix 2 in the supplementary material.

| <b>Table 2. Reasons for three delays</b>                                                                                                                |                                                |                                                                                       |
|---------------------------------------------------------------------------------------------------------------------------------------------------------|------------------------------------------------|---------------------------------------------------------------------------------------|
| <b>Reasons for seeking care delay</b>                                                                                                                   | <b>Reasons for reaching care delay</b>         | <b>Reasons for receiving quality care delay</b>                                       |
| <b>Psychological</b>                                                                                                                                    |                                                |                                                                                       |
| Belief in witchcraft                                                                                                                                    | Preference for alternative treatment           | Defaulting because of side effects of drugs                                           |
| Denial                                                                                                                                                  |                                                | Declining treatment                                                                   |
| Embarrassment                                                                                                                                           |                                                | Fear of wasting doctor's time                                                         |
| Fear of being asked to stop habits e.g. smoking                                                                                                         |                                                | Fear of treatment (e.g. mastectomy)                                                   |
| Stigma                                                                                                                                                  |                                                | Lack of consent                                                                       |
| Secrecy                                                                                                                                                 |                                                | Preference to observe                                                                 |
| Putting others needs first                                                                                                                              |                                                | Preference for alternative therapies (herbal, Chinese, acupuncture, food supplements) |
| Prior bad experience at health centre of hospital                                                                                                       |                                                |                                                                                       |
| Preference for care abroad                                                                                                                              |                                                |                                                                                       |
| Lack of trust in health system                                                                                                                          |                                                |                                                                                       |
| Fear of doctors, diagnosis, dying, job loss, losing part of body, missing family commitments because of treatment, telling people of illness, treatment |                                                |                                                                                       |
| <b>Sociocultural</b>                                                                                                                                    |                                                |                                                                                       |
| Family and friends' disapproval                                                                                                                         | Family responsibilities                        | Communication barriers                                                                |
| Busy schedule                                                                                                                                           | Lack of a caregiver to accompany to facilities | Family commitments                                                                    |
| Anticipated long waiting time at clinic                                                                                                                 | Obligations at home                            | Language barrier                                                                      |
| Preference for prayers and spiritual intervention                                                                                                       |                                                | No relative to care for them during treatment                                         |
| Preference for food supplements/organic foods                                                                                                           |                                                | Patients changing mobile numbers so cannot be contacted for further management        |
| Preference for alternative therapies (herbal, homeopathy, Chinese, acupuncture)                                                                         |                                                | Ignorance on available treatment                                                      |
| No one to look after children                                                                                                                           |                                                |                                                                                       |
| Low education                                                                                                                                           |                                                |                                                                                       |
| Lack of personal initiative                                                                                                                             |                                                |                                                                                       |
| Ignorance on how to seek healthcare                                                                                                                     |                                                |                                                                                       |
| Lack of awareness of symptoms                                                                                                                           |                                                |                                                                                       |
| <b>Economic</b>                                                                                                                                         |                                                |                                                                                       |

|    |                                                    |                                                                   |                                                                                |
|----|----------------------------------------------------|-------------------------------------------------------------------|--------------------------------------------------------------------------------|
| 1  | Impact of taking time off work                     | Dependence on others for transport                                | Cancer not priority                                                            |
| 2  | Anticipated expense of treatment                   | Difficulty making appointment or reaching doctor                  | Failure to come back for follow up diagnostic or treatment appointments        |
| 3  | Transport challenges (e.g. cost)                   | High cost of prediagnostic costs                                  | Failure to find accommodation as outpatients close to treatment centre         |
| 4  | Prioritising day to day survival over seeking help | High cost of transport                                            | Financial incapability                                                         |
| 5  | Obligations at home                                | Inability to afford clinic visits                                 | High cost of medicines                                                         |
| 6  | No health insurance                                | Lack of money (for transport)                                     | Paying out of pocket expenses                                                  |
| 7  | Financial incapability                             | Work commitments                                                  | Poor nutrition                                                                 |
| 8  | <b>Geography</b>                                   |                                                                   |                                                                                |
| 9  | Distance                                           | Distance                                                          |                                                                                |
| 10 | Travelled away from home (out of comfort zone)     | Lack of knowledge of estimated distance to nearest service        |                                                                                |
| 11 | <b>Health service</b>                              |                                                                   |                                                                                |
| 12 | Lack of cancer awareness programs and screening    | Lack of navigation in primary care                                | Absence of multidisciplinary team care                                         |
| 13 |                                                    | Long investigation time at first contact                          | Burn out and disinterest of health care workers                                |
| 14 |                                                    | Misdiagnosis at lower levels                                      | Diagnostic delay                                                               |
| 15 |                                                    | Was told by health care worker there was no treatment for disease | Chemotherapy stock outs                                                        |
| 16 |                                                    | Turned away from clinics for arriving late                        | Few specialists                                                                |
| 17 |                                                    |                                                                   | High patient volume compared to resources                                      |
| 18 |                                                    |                                                                   | Lack of continuity of care by same healthcare workers                          |
| 19 |                                                    |                                                                   | Lack of palliative care and counselling services                               |
| 20 |                                                    |                                                                   | Lack of pathology and screening services                                       |
| 21 |                                                    |                                                                   | Lack of smoking cessation clinics                                              |
| 22 |                                                    |                                                                   | Lack of specific appointments with specialists                                 |
| 23 |                                                    |                                                                   | Unwelcoming, demotivated and uncommitted staff turn patients away              |
| 24 |                                                    |                                                                   | Long appointments, waiting periods                                             |
| 25 |                                                    |                                                                   | Misdiagnosis                                                                   |
| 26 |                                                    |                                                                   | No bed space                                                                   |
| 27 |                                                    |                                                                   | Not healthy enough to continue treatment                                       |
| 28 |                                                    |                                                                   | Patients changing mobile numbers so cannot be contacted for further management |
| 29 |                                                    |                                                                   | Poorly trained staff                                                           |
| 30 |                                                    |                                                                   | Power outages                                                                  |
| 31 |                                                    |                                                                   | Unavailability of treatment modality                                           |
| 32 |                                                    |                                                                   | Surgeon/operating room unavailability                                          |
| 33 |                                                    |                                                                   | Pre-referral diagnosis not communicated                                        |
| 34 |                                                    |                                                                   | Poor collaboration amongst health care workers                                 |

### *Seeking care*

Reasons for delays in seeking care included a lack of awareness about cancer and low health literacy which manifested itself as fears, false perceptions and beliefs and embarrassment about cancer.(26,28,31,32,35,37,38,40,42,44,51,55,58,60,64,65,67,70,71,73,77,78) There was also a preference for seeking treatment from traditional or faith-based healers.(27,30,32,35–38,42,44,46,48,49,51,55,57,58,65,70,71,77,78) Participants in the various studies recounted the belief they had not been sick enough or didn't have adequate money to justify abandoning their obligations (both financial and social)(26,27,29,31,37,38,42,45,51,52,55,56,58,72,77,78); they rather reassured themselves about the seriousness of symptoms (for example lumps) as the symptoms did not cause disability or pain in the early stages of disease and that it was self-limiting.(26,31,36–38,42,44,47,51,53,67,73,78) Additionally, not knowing where or how to enter the health system for symptoms before they cause life threatening conditions contributed to delays in seeking treatment.(31,37,44,46) The unknown costs of managing cancer was also noted to intimidate patients and delay presentation as a result.(26,44)

### *Reaching care*

The physical distance to appropriate care was cited as a major barrier for patients who have to take into consideration transport costs to specialist facilities, accommodation and subsistence costs.(23,27–29,32,33,37,40–42,47,50–52,55,56,60,62,71–73,77,78) Even when transport is made available, they carry the cost of being away from their jobs and families. Other than geographical distance, low levels of cancer care knowledge amongst primary level healthcare staff was also a barrier for referral of patients.(31,37,45,70,74,78) This was identified as a source of misdiagnosis and underlay the lack of recognition for the urgency of transferring care to tertiary institutions. In one study, participants had reported that they had been misinformed at the primary level that their condition was incurable.(38)

### *Receiving quality care*

The paucity of infrastructure, equipment, medication and human resources needed for cancer care underpinned the barriers to receiving quality cancer care.(28,62,69) We noted a lack of availability or poor quality diagnostic equipment and treatment facilities were also challenges identified.(58,62,70) Other factors included demotivated and burnt-out staff and the lack of specialist training of staff in cancer.(25,28,31,32,38,56,62) Tensions and mistrust of the system as a whole between the patients and healthcare providers operating in constrained environments were reported as contributing to factors that drove patients to alternate medicine or even simply abandon treatment.(31,47,52) In addition, the lack of availability of essential resources lead to high prices and catastrophic out of pocket expenses for the patients.(23,29,31,32,36,42,47,49,52,55,56,61,62,76,77)

## **Discussion**

The impact of delays in the cancer care pathway on persistent high mortality rates are well recognized. Countries in SSA are called upon to accelerate the establishment and implementation of their cancer control plans and it is pertinent to recognize that whilst respecting the unique aspects of each nation, utilization of a common knowledge base avoids duplication and allows for prudent efficient use of scarce resources.(2,16) In this regard, results from research using a robust methodological approach provides a foundation for common knowledge that is applicable broadly.(17)

However, our systematic review of studies in SSA investigating the barriers to access to cancer care demonstrates a very limited number of studies despite the importance of this subject area, with heterogeneity in study design which limits their translational impact. The publications we found were clustered to the Northern and West African regions and given the heterogenous factors influencing the SSA region data cannot reliably be extrapolated across the continent. In addition, 70% of the studies focused on breast and cervical cancer with major causes of cancer related mortality and morbidity such as prostate and

1 esophageal cancer not addressed which is of major concern. The results highlight the need for a coordinated  
2 approach to manage these evidence gaps with no studies addressing the barriers to diagnosis and  
3 treatment of cancer identified in 35 of 48 countries in SSA.  
4

5 The capacity to conduct robust research is increasingly possible across countries in SSA but it requires  
6 considerable efforts to coordinate these resources to support a common agenda based on country and  
7 regional level priorities.(80,81) Presently, a discordance between research needs and research funding  
8 priorities across the continent has been accelerated by the synthetic external agendas in individual  
9 countries rather than supporting endogenous solutions driven by those experiencing the problems.(82,83)  
10 This is exemplified by our findings which show research is concentrated on a pool of 4 or 5 better resourced  
11 countries and two main tumour types likely related to the availability of external funding.  
12  
13

14 Most published data have been obtained through cross sectional surveys, which detail the prevalence of  
15 reasons for delays but fail to account for important cofounding factors and system level processes to enable  
16 the effective problem solving. None the less they still provide a valuable baseline insight that we integrated  
17 into a "Three delays" model.  
18  
19

20 The common roots of the reasons for delays at each level of seeking, reaching, and receiving quality care as  
21 listed in Table 2. are firstly fear (apprehension or mistrust) and secondly, a lack of resources (financial,  
22 human or infrastructure). Across all delays cost is a major factor that influences the interval between the  
23 stages in the cancer pathway. Out of pocket expenses are high with patients requiring cover for transport,  
24 accommodation, diagnostic tests and medicines. A significant number of patients live under the poverty  
25 line and it may seem unrealistic for the families to spend on what is perceived to be an incurable disease in  
26 the first instance.(84) A recent study demonstrated the threat of catastrophic health expenditure that  
27 accompanies a cancer diagnosis even with the basic drugs in Low and Middle Income Countries (LMICs).(85)  
28  
29

30 In seeking care, fear is compounded by the lack of awareness (knowledge) on the disease, availability of  
31 services or how to navigate the pathways to quality healthcare. It can drive patients to rely on familiar  
32 systems of alternative medicines (traditional healers, 'Chinese' medicine, Faith based healers). In addition  
33 to these challenges taking time off from work or domestic obligations to attend healthcare appointments  
34 is often relegated in terms of priorities due to financial and social implications. Societal expectations also  
35 create fear of stigmatism and promote secrecy that hinder free information flow between those seeking it  
36 and its custodians.  
37  
38

39 For reaching care the lack of adequate coordination of services was the dominant theme. Poorly trained  
40 staff or lack of support for primary health care practitioners delayed referrals to more specialized services  
41 and the health system in such a scenario could possibly discourage patients on the curability of the  
42 condition. Links and relationships are essential between primary and secondary/tertiary healthcare as most  
43 patients will present first to local clinics or health posts. This is particularly important where systems are not  
44 electronically linked for results to be easily attainable between practitioners.  
45  
46

47 To receive quality care, patients need access to a health care the system with appropriate human resource  
48 and infrastructure (diagnostic and treatment). A lack of human resource encompasses both the  
49 competence of the workforce for tertiary services as well as the actual low numerical value of specialized  
50 knowledgeable staff leading to burnout. Equally a skilled and competent workforce without appropriate  
51 infrastructure or sufficient medication and surgical supplies cannot be expected to deliver quality care.  
52 Another aspect to consider for receiving quality care includes patient factors like good nutritional status,  
53 financial capacity, and social capital to undergo treatment. Acceptance and adherence to treatment are  
54 also integral to a successful intervention as investigated by Anyanwu et al.(23)  
55  
56  
57  
58  
59  
60



1 The findings from our study suggests that reasons for delays are interlinked both at an individual level and  
2 population level (Figure 1). An individual with vulnerabilities at the seeking level phase would most likely  
3 experience repetitive barriers in reaching care as well as receiving quality care. An underdeveloped health  
4 system with poor linkages between primary health care and tertiary level care will inevitably have a large  
5 proportion of patients falling through the cracks between phases of care. This could be due to untimely  
6 referrals and inability to support diagnostic costs thereby relying on the patient to raise funds.  
7

### 8 Limitations

9 A major limitation in the interpretation and application of the findings of this research output is the quality  
10 of the included studies. Recognition of this limitation and application of additional triangulation has  
11 assisted us to utilize what is available in this space. Future directions based on our findings would be to  
12 conduct more research studies that will provide quality data for policy formation and effective  
13 implementation.  
14  
15

### 16 Conclusion

17 To see a reduction in cancer mortality in SSA health systems need to address delays within the cancer  
18 pathway from initial presentation and appraisal to completion of treatment and the survivorship pathway.  
19 Holistic support for the patient as well as the workforce across the continuum and longitudinally in each  
20 phase is important to achieve good outcomes. Cognizance of the multiple barriers present for individual  
21 patients from developing a cancer to its treatment is important for policy makers and experts to build  
22 resilient and effective cancer control programs. With an individual in mind an effective population approach  
23 can be achieved. Due to the paucity of organized data in SSA, the starting point of research is often  
24 extrapolated from other regions who have different realities. In carrying out this systematic review we  
25 intend to provide an organized pool of information that will provide a robust resource for other researchers  
26 seeking to conduct studies in SSA.  
27  
28  
29  
30

31 \*\*\* \*\*

32  
33  
34 **Contributors** DCL, MM and AA were involved in all aspects. SM, VB, MS, ASS, RM, JS and ADM  
35 participated in study design, data interpretation, preparation and revision of manuscript.  
36

37  
38 **Funding** This work was supported by the London School of Hygiene and Tropical Medicine's Wellcome  
39 Institutional Strategic Support Fund (grant reference 204928/Z/16/Z)  
40

41 **Competing interests** The authors have no financial disclosures or other conflicts of interest to report.  
42

43  
44 **Ethics approval** Non-applicable. This study was a systematic review so did not directly involve animal or  
45 human participants. Patient consent for publication was not required.  
46

47  
48 **Data availability statement** No datasets were generated. The data extraction output is available as  
49 supplementary material.  
50  
51  
52  
53  
54  
55  
56  
57  
58  
59  
60

## References

1. 58th World Health Assembly. WHA58.22 Cancer Prevention and Control. 2005.
2. 70th World Health Assembly. WHA70.12 Cancer Prevention and Control in the context of an integrated approach. 2017.
3. GLOBOCAN. Sub-Saharan Africa Hub Source: Globocan 2020 Cancer Statistics [Internet]. 2020 [cited 2022 Apr 10]. Available from: <https://gco.iarc.fr/today/data/factsheets/populations/971-sub-saharan-africa-hub-fact-sheets.pdf>
4. Azevedo MJ. The State of Health System(s) in Africa: Challenges and Opportunities. In: Historical Perspectives on the State of Health and Health Systems in Africa, Volume II [Internet]. Cham: Springer International Publishing; 2017 [cited 2021 Dec 26]. p. 1–73. Available from: [http://link.springer.com/10.1007/978-3-319-32564-4\\_1](http://link.springer.com/10.1007/978-3-319-32564-4_1)
5. Ifeagwu SC, Yang JC, Parkes-Ratanshi R, Brayne C. Health financing for universal health coverage in Sub-Saharan Africa: a systematic review. *Glob Health Res Policy* [Internet]. 2021 Dec [cited 2021 Dec 26];6(1):8. Available from: <https://ghrp.biomedcentral.com/articles/10.1186/s41256-021-00190-7>
6. Asante A, Wasike WSK, Ataguba JE. Health Financing in Sub-Saharan Africa: From Analytical Frameworks to Empirical Evaluation. *Appl Health Econ Health Policy* [Internet]. 2020 Dec [cited 2022 May 14];18(6):743–6. Available from: <http://link.springer.com/10.1007/s40258-020-00618-0>
7. Oleribe OE, Momoh J, Uzochukwu BS, Mbofana F, Adebisi A, Barbera T, et al. Identifying Key Challenges Facing Healthcare Systems In Africa And Potential Solutions. *Int J Gen Med* [Internet]. 2019 Nov [cited 2022 May 14];Volume 12:395–403. Available from: <https://www.dovepress.com/identifying-key-challenges-facing-healthcare-systems-in-africa-and-pot-peer-reviewed-article-IJGM>
8. Zeltner T, Riahi F, Huber J. Acute and Chronic Health Challenges in Sub-Saharan Africa: An Unfinished Agenda. In: Groth H, May JF, editors. *Africa's Population: In Search of a Demographic Dividend* [Internet]. Cham: Springer International Publishing; 2017 [cited 2022 May 14]. p. 283–97. Available from: [http://link.springer.com/10.1007/978-3-319-46889-1\\_18](http://link.springer.com/10.1007/978-3-319-46889-1_18)
9. World Health Organisation, Geneva. WHO report on cancer: setting priorities, investing wisely and providing care for all. 2020.
10. McKenzie F, Zietsman A, Galukande M, Anele A, Adisa C, Cubasch H, et al. African Breast Cancer—Disparities in Outcomes (ABC-DO): protocol of a multicountry mobile health prospective study of breast cancer survival in sub-Saharan Africa. *BMJ Open* [Internet]. 2016 Aug [cited 2023 Jan 23];6(8):e011390. Available from: <https://bmjopen.bmj.com/lookup/doi/10.1136/bmjopen-2016-011390>
11. Abdel-Wahab M, Bourque JM, Pynda Y, Izewska J, Van der Merwe D, Zubizarreta E, et al. Status of radiotherapy resources in Africa: an International Atomic Energy Agency analysis. *Lancet Oncol* [Internet]. 2013 Apr [cited 2023 Jan 23];14(4):e168–75. Available from: <https://linkinghub.elsevier.com/retrieve/pii/S1470204512705326>
12. Orem J. Building Modern Cancer Care Services in Sub-Saharan Africa Based on a Clinical-Research Care Model. *Am Soc Clin Oncol Educ Book* [Internet]. 2022 Jul [cited 2023 Jan 23];(42):423–8. Available from: [https://ascopubs.org/doi/10.1200/EDBK\\_349953](https://ascopubs.org/doi/10.1200/EDBK_349953)
13. Khan MS, Meghani A, Liverani M, Roychowdhury I, Parkhurst J. How do external donors influence national health policy processes? Experiences of domestic policy actors in Cambodia and Pakistan. *Health Policy Plan* [Internet]. 2018 Mar 1 [cited 2022 May 14];33(2):215–23. Available from: <https://academic.oup.com/heapol/article/33/2/215/4718134>

14. Ollila E. Global Health Priorities - priorities of the wealthy? *Glob Health* [Internet]. 2005 [cited 2022 May 14];1(1):6. Available from: <http://globalizationandhealth.biomedcentral.com/articles/10.1186/1744-8603-1-6>
15. Romero Y, Trapani D, Johnson S, Tittenbrun Z, Given L, Hohman K, et al. National cancer control plans: a global analysis. *Lancet Oncol* [Internet]. 2018 Oct 1;19(10):e546–55. Available from: <https://www.sciencedirect.com/science/article/pii/S1470204518306818>
16. World Health Organisation. National Cancer Control Programmes. Policies and managerial guidelines. 2nd Edition. 2002.
17. Walter F, Webster A, Scott S, Emery J. The Andersen Model of Total Patient Delay: A Systematic Review of Its Application in Cancer Diagnosis. *J Health Serv Res Policy* [Internet]. 2012 Apr [cited 2021 Dec 26];17(2):110–8. Available from: <http://journals.sagepub.com/doi/10.1258/jhsrp.2011.010113>
18. Shah B, Krishnan N, Kodish SR, Yenokyan G, Fatema K, Burhan Uddin K, et al. Applying the Three Delays Model to understand emergency care seeking and delivery in rural Bangladesh: a qualitative study. *BMJ Open* [Internet]. 2020 Dec [cited 2021 Dec 26];10(12):e042690. Available from: <https://bmjopen.bmj.com/lookup/doi/10.1136/bmjopen-2020-042690>
19. Serbanescu F, Goodwin MM, Binzen S, Morof D, Asimwe AR, Kelly L, et al. Addressing the First Delay in Saving Mothers, Giving Life Districts in Uganda and Zambia: Approaches and Results for Increasing Demand for Facility Delivery Services. *Glob Health Sci Pract* [Internet]. 2019 Mar 11 [cited 2021 Dec 26];7(Supplement 1):S48–67. Available from: <http://www.ghspjournal.org/lookup/doi/10.9745/GHSP-D-18-00343>
20. Thaddeus S, Maine D. Too far to walk: Maternal mortality in context. *Soc Sci Med* [Internet]. 1994 Apr 1;38(8):1091–110. Available from: <https://www.sciencedirect.com/science/article/pii/0277953694902267>
21. Covidence. Available from: <https://app.covidence.org>
22. ROBINS-E Development Group (Higgins J, Morgan R, Rooney A, Taylor K, Thayer K, Silva R, Lemeris C, Akl A, Arroyave W, Bateson T, Berkman N, Demers P, Forastiere F, Glenn B, Hróbjartsson A, Kirrane E, LaKind J, Luben T, Lunn R, McAleenan A, McGuinness L, Meerpohl J, Mehta S, Nachman R, Obbagy J, O'Connor A, Radke E, Savović J, Schubauer-Berigan M, Schwingl P, Schunemann H, Shea B, Steenland K, Stewart T, Straif K, Tilling K, Verbeek V, Vermeulen R, Viswanathan M, Zahm S, Sterne J). Risk Of Bias In Non-randomized Studies - of Exposure (ROBINS-E). Launch version, 1 June 2022. Available from: <https://www.riskofbias.info/welcome/robins-e-tool#h.trqnh6qozyhl>
23. Anyanwu SN, Egwuonwu OA, Ihekwoaba EC. Acceptance and adherence to treatment among breast cancer patients in Eastern Nigeria. *Breast*. 2011;20 Suppl 2:S51-3.
24. Herbst CL, Miot JK, Moch SL, Ruff P. Access to colorectal cancer (CRC) chemotherapy and the associated costs in a South African public healthcare patient cohort. *J Cancer Policy* [Internet]. 2018;15((Herbst C.-L., candicelee.herbst@gmail.com; Miot J.K., Jacqui.Miot@wits.ac.za; Moch S.L., Shirra.Moch@wits.ac.za) Division of Pharmacology, Department of Pharmacy and Pharmacology, Faculty of Health Sciences, University of the Witwatersrand, 7 York Road,):18–24. Available from: <https://www.embase.com/search/results?subaction=viewrecord&id=L619562724&from=export>
25. Reibold CF, Tariku W, Eber-Schulz P, Getachew S, Addisie A, Unverzagt S, et al. Adherence to Newly Implemented Tamoxifen Therapy for Breast Cancer Patients in Rural Western Ethiopia. *Breast Care* [Internet]. 2021;((Reibold C.F.; Eber-Schulz P.; Vetter M.; Thomssen C.; Kantelhardt E.J., eva.kantelhardt@uk-halle.de) Department of Gynecology, Martin-Luther-University Halle-Wittenberg,

- Halle (Saale), Germany(Tariku W.) Ethiopian Evangelical Church of Mekane Yesus EECMY). Available from:  
<https://www.embase.com/search/results?subaction=viewrecord&id=L634013409&from=export>
26. Joffe M, Ayeni O, Norris SA, McCormack VA, Ruff P, Das I, et al. Barriers to early presentation of breast cancer among women in Soweto, South Africa. *PLoS ONE* [Internet]. 2018;13(2). Available from: <https://www.embase.com/search/results?subaction=viewrecord&id=L620429115&from=export>
27. Schleimer LE, Vianney Dusengimana JM, Butonzi J, Kigonya C, Natarajan A, Umwizerwa A, et al. Barriers to timely surgery for breast cancer in Rwanda. *Surg U S* [Internet]. 2019;166(6):1188–95. Available from:  
<https://www.embase.com/search/results?subaction=viewrecord&id=L2002699082&from=export>
28. Martin AN, Kaneza KM, Kulkarni A, Mugenzi P, Ghebre R, Ntirushwa D, et al. Cancer Control at the District Hospital Level in Sub-Saharan Africa: An Educational and Resource Needs Assessment of General Practitioners. *J Glob Oncol*. 2019;5:1–8.
29. Nakaganda A, Solt K, Kwagonza L, Driscoll D, Kampi R, Orem J. Challenges faced by cancer patients in Uganda: Implications for health systems strengthening in resource limited settings. *J Cancer Policy* [Internet]. 2021;27((Nakaganda A., annet.nakaganda@uci.or.ug; Kampi R.; Orem J.) Uganda Cancer Institute, P. O Box 3935, Kampala, Uganda(Solt K.; Driscoll D.) American Cancer Society, 250 Williams St., Atlanta, GA, United States(Kwagonza L.) Ministry of Health, Uganda, P.O B). Available from: <https://www.embase.com/search/results?subaction=viewrecord&id=L2010247673&from=export>
30. Ajah L, Ezeome IV, Umeh UA, Aniebue UU, Nwankwo TO. Complementary and alternative medicine. Use and challenges among gynaecological cancer patients in Nigeria: Experiences in a tertiary health institution - Preliminary results. *Eur J Gynaecol Oncol* [Internet]. 2019;40(1):101–5. Available from: <https://www.embase.com/search/results?subaction=viewrecord&id=L2002101625&from=export>
31. Mapanga W, Norris SA, Chen WC, Blanchard C, Graham A, Baldwin-Ragaven L, et al. Consensus study on the health system and patient-related barriers for lung cancer management in South Africa. *PLoS ONE* [Internet]. 2021;16(2 February). Available from:  
<https://www.embase.com/search/results?subaction=viewrecord&id=L2011046361&from=export>
32. Oladeji A, Atalabi O, Jimoh M, Ntekim I, Elumelu T. Delay in presentation of cancer patients for diagnosis and management: An institutional report. *Internet J Oncol* [Internet]. 2017;13(1). Available from: <https://www.embase.com/search/results?subaction=viewrecord&id=L614940472&from=export>
33. Rayne S, Schnippel K, Kruger D, Benn CA, Firnhaber C. Delay to diagnosis and breast cancer stage in an urban south african breast clinic. *S Afr Med J* [Internet]. 2019;109(3):159–63. Available from: <https://www.embase.com/search/results?subaction=viewrecord&id=L2001617790&from=export>
34. Gebremariam A, Assefa M, Addissie A, Worku A, Dereje N, Abreha A, et al. Delayed initiation of adjuvant chemotherapy among women with breast cancer in Addis Ababa, Ethiopia. *Breast Cancer Res Treat* [Internet]. 2021;((Gebremariam A., alemg25@gmail.com) Department of Public Health, College of Medicine and Health Sciences, Adigrat University, Tigray, Adigrat, Ethiopia(Gebremariam A., alemg25@gmail.com; Addissie A.; Worku A.; Dereje N.) Department of Preventive Medicine,). Available from:  
<https://www.embase.com/search/results?subaction=viewrecord&id=L2010531904&from=export>
35. Otieno ES, Micheni JN, Kimende SK, Mutai KK. Delayed presentation of breast cancer patients. *East Afr Med J* [Internet]. 2010;87(4):147–50. Available from:  
<https://www.embase.com/search/results?subaction=viewrecord&id=L366363929&from=export>

- 1  
2  
3  
4  
5  
6  
7  
8  
9  
10  
11  
12  
13  
14  
15  
16  
17  
18  
19  
20  
21  
22  
23  
24  
25  
26  
27  
28  
29  
30  
31  
32  
33  
34  
35  
36  
37  
38  
39  
40  
41  
42  
43  
44  
45  
46  
47  
48  
49  
50  
51  
52  
53  
54  
55  
56  
57  
58  
59  
60
36. Ukwenya AY, Yusufu LMD, Nmadu PT, Garba ES, Ahmed A. Delayed treatment of symptomatic breast cancer: The experience from Kaduna, Nigeria. *S Afr J Surg* [Internet]. 2008;46(4):106–11. Available from: <https://www.embase.com/search/results?subaction=viewrecord&id=L352683097&from=export>
  37. Pace LE, Mpunga T, Hategekimana V, Dusengimana JMV, Habineza H, Bigirimana JB, et al. Delays in breast cancer presentation and diagnosis at two rural cancer referral centers in Rwanda. *Oncologist* [Internet]. 2015;20(7):780–8. Available from: <https://www.embase.com/search/results?subaction=viewrecord&id=L605124301&from=export>
  38. Ezeome ER. Delays in presentation and treatment of breast cancer in Enugu, Nigeria. *Niger J Clin Pract* [Internet]. 2010;13(3):311–6. Available from: <https://www.embase.com/search/results?subaction=viewrecord&id=L359540342&from=export>
  39. Jedy-Agba E, McCormack V, Olaomi O, Badejo W, Yilkudi M, Yawe T, et al. Determinants of stage at diagnosis of breast cancer in Nigerian women: sociodemographic, breast cancer awareness, health care access and clinical factors. *Cancer Causes Control* [Internet]. 2017;28(7):685–97. Available from: <https://www.embase.com/search/results?subaction=viewrecord&id=L615772850&from=export>
  40. Foerster M, McKenzie F, Zietsman A, Galukande M, Anele A, Adisa C, et al. Dissecting the journey to breast cancer diagnosis in sub-Saharan Africa: Findings from the multicountry ABC-DO cohort study. *Int J Cancer* [Internet]. 2021;148(2):340–51. Available from: <https://www.embase.com/search/results?subaction=viewrecord&id=L2005754565&from=export>
  41. Yang K, Msami K, Calixte R, Mwaiselage J, Dorn J, Soliman AS. Educational Opportunities for Down-Staging Breast Cancer in Low-Income Countries: an Example from Tanzania. *J Cancer Educ Off J Am Assoc Cancer Educ* [Internet]. 2019;34(6):1225–30. Available from: <https://www.embase.com/search/results?subaction=viewrecord&id=L629125676&from=export>
  42. Olarewaju SO, Oyekunle EO, Bamiro AO. Effect of sociodemographic variables on patient and diagnostic delay of breast cancer at the foremost health care institution in Nigeria. *J Glob Oncol* [Internet]. 2019;2019(5). Available from: <https://www.embase.com/search/results?subaction=viewrecord&id=L2002420094&from=export>
  43. Low DH, Phipps W, Orem J, Casper C, Bender Ignacio RA. Engagement in HIV Care and Access to Cancer Treatment Among Patients With HIV-Associated Malignancies in Uganda. *J Glob Oncol*. 2019;5:1–8.
  44. Dereje N, Addissie A, Worku A, Assefa M, Abraha A, Tigeneh W, et al. Extent and predictors of delays in diagnosis of cervical cancer in Addis Ababa, Ethiopia: A population-based prospective study. *J Glob Oncol* [Internet]. 2020;6((Dereje N., neba.jahovy@gmail.com) School of Public Health, Wachemo University, Hosanna, Ethiopia(Dereje N., jahovy@gmail.com; Addissie A.; Worku A.) Department of Preventive Medicine, School of Public Health, Addis Ababa University, Addis Ababa, Eth):277–84. Available from: <https://www.embase.com/search/results?subaction=viewrecord&id=L2005526468&from=export>
  45. Dereje N, Gebremariam A, Addissie A, Worku A, Assefa M, Abraha A, et al. Factors associated with advanced stage at diagnosis of cervical cancer in Addis Ababa, Ethiopia: A population-based study. *BMJ Open* [Internet]. 2020;10(10). Available from: <https://www.embase.com/search/results?subaction=viewrecord&id=L633090395&from=export>
  46. Zeleke S, Anley M, Kefale D, Wassihun B. Factors associated with delayed diagnosis of cervical cancer in tikur anbesa specialized hospital, Ethiopia, 2019: Cross-sectional study. *Cancer Manag Res* [Internet]. 2021;13((Zeleke S., shegawzn@gmail.com; Kefale D.) Department of Nursing, College of Health Sciences, Debre Tabor University, Debre Tabor, Ethiopia(Anley M.) Department of Oncology Nursing,

- Tikur Anbesa Specialized Hospital, Addis Ababa, Ethiopia(Wassihun B.) Dep):579–85. Available from: <https://www.embase.com/search/results?subaction=viewrecord&id=L2005940643&from=export>
47. Long C, Titus Ngwa Tagang E, Popat RA, Lawong EK, Brown JA, Wren SM. Factors associated with delays to surgical presentation in North-West Cameroon. *Surg U S* [Internet]. 2015;158(3):756–63. Available from: <https://www.embase.com/search/results?subaction=viewrecord&id=L604786739&from=export>
48. Brinton L, Figueroa J, Adjei E, Ansong D, Biritwum R, Edusei L, et al. Factors contributing to delays in diagnosis of breast cancers in Ghana, West Africa. *Breast Cancer Res Treat* [Internet]. 2017;162(1):105–14. Available from: <https://www.embase.com/search/results?subaction=viewrecord&id=L613880893&from=export>
49. Fasunla AJ, Ogunkeyede SA. Factors contributing to poor management outcome of sinonasal malignancies in South-west Nigeria. *Ghana Med J* [Internet]. 2013;47(1):10–5. Available from: <https://www.embase.com/search/results?subaction=viewrecord&id=L563019178&from=export>
50. Anakwenze C, Bhatia R, Rate W, Bakwenabatsile L, Ngoni K, Rayne S, et al. Factors related to advanced stage of cancer presentation in Botswana. *J Glob Oncol* [Internet]. 2018;2018(4). Available from: <https://www.embase.com/search/results?subaction=viewrecord&id=L2001734256&from=export>
51. Čačala SR, Gilart J. Factors relating to late presentation of patients with breast cancer in area 2 KwaZulu-Natal, South Africa. *J Glob Oncol* [Internet]. 2017;3(5):497–501. Available from: <https://www.embase.com/search/results?subaction=viewrecord&id=L2010115669&from=export>
52. Subramanian S, Gakunga R, Jones M, Kinyanjui A, Ochieng' E, Gikaara N, et al. Financial barriers related to breast cancer screening and treatment: A cross-sectional survey of women in Kenya. *J Cancer Policy* [Internet]. 2019;22((Subramanian S., ssubramanian@rti.org; Jones M., madeleinejones@rti.org) RTI International, Nairobi, United States(Gakunga R., robaigakunga@yahoo.com) Independent Research Scientist, Nairobi, Kenya(Kinyanjui A., asaphkinyanjui@kehpc.org; Gikaara N., ngik). Available from: <https://www.embase.com/search/results?subaction=viewrecord&id=L2003928016&from=export>
53. Moodley J, Cairncross L, Naiker T, Constant D. From symptom discovery to treatment - women's pathways to breast cancer care: A cross-sectional study. *BMC Cancer* [Internet]. 2018;18(1). Available from: <https://www.embase.com/search/results?subaction=viewrecord&id=L621323103&from=export>
54. Knapp GC, Tansley G, Olasehinde O, Wuraola F, Adisa A, Arowolo O, et al. Geospatial access predicts cancer stage at presentation and outcomes for patients with breast cancer in southwest Nigeria: A population-based study. *Cancer* [Internet]. 2020;((Knapp G.C., knappg@pm.me) Department of Surgery, Division of General Surgery, Dalhousie University, Halifax, NS, Canada(Tansley G.) Department of Medicine, Division of Critical Care, University of British Columbia, Vancouver, BC, Canada(Olasehinde O.; Wu). Available from: <https://www.embase.com/search/results?subaction=viewrecord&id=L2007682644&from=export>
55. Togawa K, Anderson BO, Foerster M, Galukande M, Zietsman A, Pontac J, et al. Geospatial barriers to healthcare access for breast cancer diagnosis in sub-Saharan African settings: The African Breast Cancer—Disparities in Outcomes Cohort Study. *Int J Cancer* [Internet]. 2020;((Togawa K., togawak@iarc.fr; Foerster M.; McKenzie F.; Schüz J.; McCormack V.) Section of Environment and Radiation, International Agency for Research on Cancer, Lyon, France(Anderson B.O.) Division of Public Health Sciences, Fred Hutchinson Cancer Resear). Available from: <https://www.embase.com/search/results?subaction=viewrecord&id=L2007544642&from=export>
56. Tapera O, Dreyer G, Kadzatsa W, Nyakabau AM, Stray-Pedersen B, Sjh H. Health system constraints affecting treatment and care among women with cervical cancer in Harare, Zimbabwe. *BMC Health*

Serv Res [Internet]. 2019;19(1):829. Available from:

<https://www.embase.com/search/results?subaction=viewrecord&id=L629847430&from=export>

57. Grosse Frie K, Kamaté B, Traoré CB, Coulibaly B, Mallé B, Kantelhardt EJ. Health system organisation and patient pathways: breast care patients' trajectories and medical doctors' practice in Mali. *BMC Public Health* [Internet]. 2019;19(1):204. Available from:  
<https://www.embase.com/search/results?subaction=viewrecord&id=L626442404&from=export>
58. Alatise OI, Fischer SE, Ayandipo OO, Omisore AG, Olatoke SA, Kingham TP. Health-seeking behavior and barriers to care in patients with rectal bleeding in Nigeria. *J Glob Oncol* [Internet]. 2017;3(6):749–56. Available from:  
<https://www.embase.com/search/results?subaction=viewrecord&id=L2010115698&from=export>
59. Martei YM, Grover S, Bilker WB, Monare B, Setlhako DI, Ralefala TB, et al. Impact of Essential Medicine Stock Outs on Cancer Therapy Delivery in a Resource-Limited Setting. *J Glob Oncol*. 2019;5:1–11.
60. Agodirin O, Olatoke S, Rahman G, Olaogun J, Kolawole O, Agboola J, et al. Impact of Primary Care Delay on Progression of Breast Cancer in a Black African Population: A Multicentered Survey. *J Cancer Epidemiol* [Internet]. 2019; Available from:  
<https://www.embase.com/search/results?subaction=viewrecord&id=L628975950&from=export>
61. Foerster M, Anderson BO, McKenzie F, Galukande M, Anele A, Adisa C, et al. Inequities in breast cancer treatment in sub-Saharan Africa: Findings from a prospective multi-country observational study. *Breast Cancer Res* [Internet]. 2019;21(1). Available from:  
<https://www.embase.com/search/results?subaction=viewrecord&id=L628886115&from=export>
62. Leng J, Ntekim AI, Ibraheem A, Anakwenze CP, Golden DW, Olopade OI. Infrastructural challenges lead to delay of curative radiotherapy in Nigeria. *J Glob Oncol* [Internet]. 2020;6((Leng J.) University of Chicago, Pritzker School of Medicine, Chicago, IL, United States(Ntekim A.I.) Department of Radiation Oncology, College of Medicine, University of Ibadan, Ibadan, Nigeria(Ibraheem A.) Department of Medicine, University of Chicago.);269–76. Available from:  
<https://www.embase.com/search/results?subaction=viewrecord&id=L2005526469&from=export>
63. Tesfaw A, Getachew S, Addissie A, Jemal A, Wienke A, Taylor L, et al. Late-Stage Diagnosis and Associated Factors Among Breast Cancer Patients in South and Southwest Ethiopia: A Multicenter Study. *Clin Breast Cancer* [Internet]. 2021;21(1):e112–9. Available from:  
<https://www.embase.com/search/results?subaction=viewrecord&id=L2008397755&from=export>
64. Mlange R, Matovelo D, Rambau P, Kidenya B. Patient and disease characteristics associated with late tumour stage at presentation of cervical cancer in northwestern Tanzania. *BMC Womens Health* [Internet]. 2016;16(1). Available from:  
<https://www.embase.com/search/results?subaction=viewrecord&id=L607880845&from=export>
65. Tesfaw A, Demis S, Munye T, Ashuro Z. Patient delay and contributing factors among breast cancer patients at two cancer referral centres in Ethiopia: A cross-sectional study. *J Multidiscip Healthc* [Internet]. 2020;13((Tefaw A., aragesfa05@gmail.com) Department of Public Health, Debre Tabor University, College of Health Sciences, Debre Tabor, Ethiopia(Demis S.) Department of Pediatrics and neonatal Nursing, Debre Tabor University, College of Health Sciences, Debre T):1391–401. Available from: <https://www.embase.com/search/results?subaction=viewrecord&id=L2005384806&from=export>
66. Page CM, Ibrahim S, Park LP, Huchko MJ. Patient factors affecting successful linkage to treatment in a cervical cancer prevention program in Kenya: A prospective cohort study. *PLoS ONE* [Internet]. 2019;14(9). Available from:  
<https://www.embase.com/search/results?subaction=viewrecord&id=L2002929519&from=export>

- 1 67. Bhatia RK, Rayne S, Rate W, Bakwenabatsile L, Monare B, Anakwenze C, et al. Patient Factors  
2 Associated With Delays in Obtaining Cancer Care in Botswana. *J Glob Oncol*. 2018;4:1–13.
- 3  
4 68. Ibrahim A, Rasch V, Pukkala E, Aro AR. Predictors of cervical cancer being at an advanced stage at  
5 diagnosis in Sudan. *Int J Womens Health* [Internet]. 2011;3(1):385–9. Available from:  
6 <https://www.embase.com/search/results?subaction=viewrecord&id=L363132886&from=export>  
7
- 8 69. Wambalaba FW, Son B, Wambalaba AE, Nyong’o D, Nyong’o A. Prevalence and Capacity of Cancer  
9 Diagnostics and Treatment: A Demand and Supply Survey of Health-Care Facilities in Kenya. *Cancer*  
10 *Control* [Internet]. 2019;26(1). Available from:  
11 <https://www.embase.com/search/results?subaction=viewrecord&id=L2003824743&from=export>  
12
- 13 70. Awofeso O, Roberts AA, Salako O, Balogun L, Okediji P. Prevalence and Pattern of Late-Stage  
14 Presentation in Women with Breast and Cervical Cancers in Lagos University Teaching Hospital,  
15 Nigeria. *Niger Med J*. 2018;59(6):74–9.
- 16  
17 71. Ntirenganya F, Petroze RT, Kamara TB, Groen RS, Kushner AL, Kyamanywa P, et al. Prevalence of  
18 breast masses and barriers to care: Results from a population-based survey in Rwanda and Sierra Leone.  
19 *J Surg Oncol* [Internet]. 2014;110(8):903–6. Available from:  
20 <https://www.embase.com/search/results?subaction=viewrecord&id=L53283925&from=export>  
21  
22
- 23 72. De Boer C, Niyonzima N, Orem J, Bartlett J, Zafar SY. Prognosis and delay of diagnosis among  
24 Kaposi’s sarcoma patients in Uganda: A cross-sectional study. *Infect Agent Cancer* [Internet].  
25 2014;9(1). Available from:  
26 <https://www.embase.com/search/results?subaction=viewrecord&id=L53142060&from=export>  
27  
28
- 29 73. Mwaka AD, Garimoi CO, Were EM, Roland M, Wabinga H, Lyratzopoulos G. Social, demographic and  
30 healthcare factors associated with stage at diagnosis of cervical cancer: cross-sectional study in a tertiary  
31 hospital in Northern Uganda. *BMJ Open*. 2016;6(1):e007690.
- 32  
33 74. Tadesse SK. Socio-economic and cultural vulnerabilities to cervical cancer and challenges faced by  
34 patients attending care at Tikur Anbessa Hospital: A cross sectional and qualitative study. *BMC*  
35 *Womens Health* [Internet]. 2015;15(1). Available from:  
36 <https://www.embase.com/search/results?subaction=viewrecord&id=L606015107&from=export>  
37  
38
- 39 75. Dickens C, Joffe M, Jacobson J, Venter F, Schüz J, Cubasch H, et al. Stage at breast cancer diagnosis  
40 and distance from diagnostic hospital in a periurban setting: A South African public hospital case series  
41 of over 1,000 women. *Int J Cancer* [Internet]. 2014;135(9):2173–82. Available from:  
42 <https://www.embase.com/search/results?subaction=viewrecord&id=L53094928&from=export>  
43  
44
- 45 76. Swanson M, Nakalembe M, Chen LM, Ueda S, Namugga J, Nakisige C, et al. Surgical candidacy and  
46 treatment initiation among women with cervical cancer at public referral hospitals in Kampala, Uganda:  
47 A descriptive cohort study. *BMJ Open* [Internet]. 2020;10(12). Available from:  
48 <https://www.embase.com/search/results?subaction=viewrecord&id=L633652979&from=export>  
49
- 50 77. Clegg-Lamptey J, Dakubo J, Attobra YN. Why do breast cancer patients report late or abscond during  
51 treatment in Ghana? A pilot study. *Ghana Med J*. 2009;43(3):127–31.
- 52  
53 78. Agodirin O, Olatoke S, Rahman G, Olaogun J, Olasehinde O, Katung A, et al. Presentation intervals and  
54 the impact of delay on breast cancer progression in a black African population. *BMC Public Health*  
55 [Internet]. 2020;20(1):962. Available from:  
56 <https://www.embase.com/search/results?subaction=viewrecord&id=L632140419&from=export>  
57  
58  
59  
60



- 1  
2  
3  
4  
5  
6  
7  
8  
9  
10  
11  
12  
13  
14  
15  
16  
17  
18  
19  
20  
21  
22  
23  
24  
25  
26  
27  
28  
29  
30  
31  
32  
33  
34  
35  
36  
37  
38  
39  
40  
41  
42  
43  
44  
45  
46  
47  
48  
49  
50  
51  
52  
53  
54  
55  
56  
57  
58  
59  
60
79. Martins T, Merriel SWD, Hamilton W. Routes to diagnosis of symptomatic cancer in sub-Saharan Africa: systematic review. *BMJ Open* [Internet]. 2020 Nov [cited 2023 Jan 23];10(11):e038605. Available from: <https://bmjopen.bmj.com/lookup/doi/10.1136/bmjopen-2020-038605>
  80. Nyirenda T, Bockarie M, Machingaidze S, Nderu M, Singh M, Fakier N, et al. Strengthening capacity for clinical research in sub-Saharan Africa: partnerships and networks. *Int J Infect Dis* [Internet]. 2021 Sep [cited 2022 May 15];110:54–61. Available from: <https://linkinghub.elsevier.com/retrieve/pii/S120197122100549X>
  81. Graef KM, Okoye I, Ohene Oti NO, Dent J, Odedina FT. Operational Strategies for Clinical Trials in Africa. *JCO Glob Oncol* [Internet]. 2020 Nov [cited 2022 May 15];(6):973–82. Available from: <https://ascopubs.org/doi/10.1200/JGO.19.00204>
  82. The-Nature-of-and-Motive-for-Academic-Research-in-Higher-Edu.ris.
  83. Mutapi F. Africa should set its own research agenda [Internet]. *World view*. 2019 [cited 2022 Apr 10]. Available from: <https://www.nature.com/articles/d41586-019-03627-9>
  84. McCormack V, Newton R. Research priorities for social inequalities in cancer in sub-Saharan Africa. [Internet]. International Agency for Research on Cancer; 2019. Available from: <https://www.ncbi.nlm.nih.gov/books/NBK566204>
  85. Fundytus A, Sengar M, Lombe D, Hopman W, Jalink M, Gyawali B, et al. Access to cancer medicines deemed essential by oncologists in 82 countries: an international, cross-sectional survey. *Lancet Oncol* [Internet]. 2021 Oct [cited 2021 Dec 27];22(10):1367–77. Available from: <https://linkinghub.elsevier.com/retrieve/pii/S1470204521004630>

**Figure 1. Three delays framework**

**Figure 2. Flowchart of study selection**

**Figure 3. Quality assessment of studies (n= 14)**



Figure 1: Three Delays Framework

Peer review only



Figure 2. Flowchart of study selection as per Preferred Reporting Items for Systematic Reviews and Meta-Analyses (PRISMA) guidance

| Study            | Risk of bias domains |    |    |    |    |    |    | Overall |
|------------------|----------------------|----|----|----|----|----|----|---------|
|                  | D1                   | D2 | D3 | D4 | D5 | D6 | D7 |         |
| Gebremariam 2021 | -                    | +  | -  | X  | X  | +  | -  | X       |
| Zelege 2021      | X                    | +  | -  | -  | X  | +  | -  | X       |
| Tesfaw 2020      | X                    | X  | !  | +  | -  | +  | -  | !       |
| Knapp 2020       | X                    | X  | -  | +  | X  | +  | -  | !       |
| Schleimer 2019   | X                    | +  | !  | -  | X  | +  | -  | !       |
| Martei 2019      | X                    | +  | X  | +  | !  | X  | -  | !       |
| Dickens 2014     | X                    | X  | -  | -  | X  | +  | -  | !       |
| DeBoer 2014      | X                    | -  | -  | -  | X  | -  | -  | X       |
| Ibrahim 2011     | -                    | !  | -  | +  | X  | -  | -  | !       |
| Anyanwu 2011     | X                    | X  | -  | -  | X  | +  | -  | !       |
| Page 2019        | X                    | +  | -  | +  | X  | +  | -  | X       |
| Foerster 2019    | -                    | +  | +  | +  | -  | +  | -  | X       |
| Cacala 2017      | X                    | -  | -  | +  | X  | +  | -  | X       |
| Jedy-Agba 2017   | -                    | -  | !  | -  | -  | +  | -  | !       |

Domains:  
D1: Bias due to confounding.  
D2: Bias arising from measurement of the exposure.  
D3: Bias in selection of participants into the study (or into the analysis).  
D4: Bias due to post-exposure interventions.  
D5: Bias due to missing data.  
D6: Bias arising from measurement of the outcome.  
D7: Bias in selection of the reported result.

Judgement  
! Very high  
X High  
- Some concerns  
+ Low

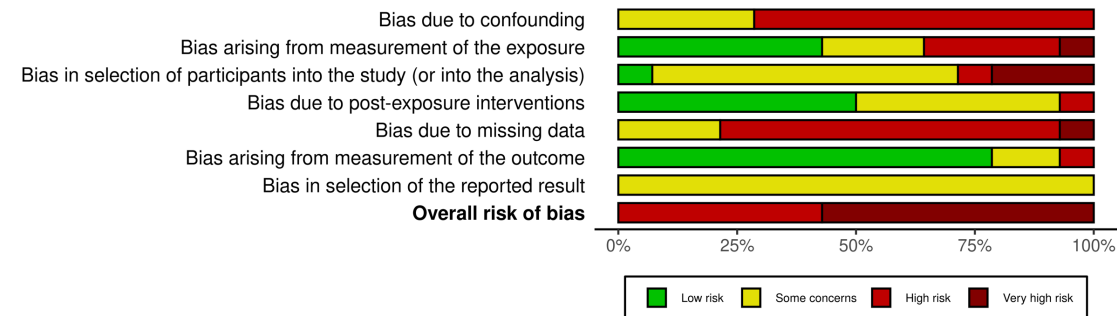

Figure 3. Quality assessment of studies , n= 14.

McGuinness, LA, Higgins, JPT. Risk-of-bias VISualization (robvis): An R package and Shiny web app for visualizing risk-of-bias assessments. Res Syn Meth. 2020; 1- 7. <https://doi.org/10.1002/jrsm.1411>

| <b>Systematic review</b>                |                                                                                                                                                                                                                                                                                                                                                                                                                                                                                                                                                                                                                                                                                                                                                                                                                                                                                                                                                                                                 |
|-----------------------------------------|-------------------------------------------------------------------------------------------------------------------------------------------------------------------------------------------------------------------------------------------------------------------------------------------------------------------------------------------------------------------------------------------------------------------------------------------------------------------------------------------------------------------------------------------------------------------------------------------------------------------------------------------------------------------------------------------------------------------------------------------------------------------------------------------------------------------------------------------------------------------------------------------------------------------------------------------------------------------------------------------------|
| <b>Databases</b>                        |                                                                                                                                                                                                                                                                                                                                                                                                                                                                                                                                                                                                                                                                                                                                                                                                                                                                                                                                                                                                 |
|                                         | PubMed                                                                                                                                                                                                                                                                                                                                                                                                                                                                                                                                                                                                                                                                                                                                                                                                                                                                                                                                                                                          |
| <b>Search terms</b>                     |                                                                                                                                                                                                                                                                                                                                                                                                                                                                                                                                                                                                                                                                                                                                                                                                                                                                                                                                                                                                 |
| <b>Synonyms</b>                         |                                                                                                                                                                                                                                                                                                                                                                                                                                                                                                                                                                                                                                                                                                                                                                                                                                                                                                                                                                                                 |
| 1. Cancer<br>ti,ab                      | cancer OR tumour OR tumor OR neopla* OR malignan* OR carcinoma                                                                                                                                                                                                                                                                                                                                                                                                                                                                                                                                                                                                                                                                                                                                                                                                                                                                                                                                  |
| 2. Delay<br>ti, ab                      | barrier* OR delay* OR access OR late OR interval                                                                                                                                                                                                                                                                                                                                                                                                                                                                                                                                                                                                                                                                                                                                                                                                                                                                                                                                                |
| 3. Diagnosis and<br>treatment<br>ti, ab | diagnos* OR presentation OR intervention OR referral OR consult* OR treatment OR therap*                                                                                                                                                                                                                                                                                                                                                                                                                                                                                                                                                                                                                                                                                                                                                                                                                                                                                                        |
| 4. countries<br>ti,ab                   | angola OR benin OR botswana OR burkina faso OR burundi OR cameroon OR cameron OR cape verde OR cabo verde OR central african republic OR ubangi shari OR chad OR comoros OR comoro islands OR iles comores OR congo brazzaville OR congo democratic republic OR democratic republic of congo OR congo OR zaire OR cote d ivoire OR cote divoire OR ivory coast OR djibouti OR french somaliland OR equatorial guinea OR eritrea OR ethiopia OR gabon OR Gabonese republic OR gambia OR ghana OR gold coast OR guinea OR guinea bissau OR kenya OR lesotho OR basutoland OR liberia OR madagascar OR malagasy OR malawi OR nyasaland OR mali OR mauritania OR mauritius OR mozambique OR namibia OR niger OR nigeria OR réunion OR rwanda OR Ruanda OR sao tome OR principe OR senegal OR seychelles OR sierra leone OR somalia OR south africa OR south sudan OR sudan OR swaziland OR tanzania OR tanganyika OR togo OR togolese republic OR uganda OR zambia OR zimbabwe OR africa OR african |
| 5. Qualitative search<br>terms          | qualitative* OR narrative* OR interview* OR focus group* OR grounded theory*                                                                                                                                                                                                                                                                                                                                                                                                                                                                                                                                                                                                                                                                                                                                                                                                                                                                                                                    |

| Systematic review                       |                                                                                                                                                                                                                                                                                                                                                                                                                                                                                                                                                                                                                                                                                                                                                                                                                                                                                                                                                                                                                                                                                                                                                                                                                                                                                                                                                                                                                                                                                                                                                                      |
|-----------------------------------------|----------------------------------------------------------------------------------------------------------------------------------------------------------------------------------------------------------------------------------------------------------------------------------------------------------------------------------------------------------------------------------------------------------------------------------------------------------------------------------------------------------------------------------------------------------------------------------------------------------------------------------------------------------------------------------------------------------------------------------------------------------------------------------------------------------------------------------------------------------------------------------------------------------------------------------------------------------------------------------------------------------------------------------------------------------------------------------------------------------------------------------------------------------------------------------------------------------------------------------------------------------------------------------------------------------------------------------------------------------------------------------------------------------------------------------------------------------------------------------------------------------------------------------------------------------------------|
| Databases                               | EMBASE                                                                                                                                                                                                                                                                                                                                                                                                                                                                                                                                                                                                                                                                                                                                                                                                                                                                                                                                                                                                                                                                                                                                                                                                                                                                                                                                                                                                                                                                                                                                                               |
| Search terms                            | Synonyms                                                                                                                                                                                                                                                                                                                                                                                                                                                                                                                                                                                                                                                                                                                                                                                                                                                                                                                                                                                                                                                                                                                                                                                                                                                                                                                                                                                                                                                                                                                                                             |
| 1. Cancer<br>ti,ab                      | cancer:ti,ab OR tumour:ti,ab OR tumor:ti,ab OR neopla*:ti,ab<br>OR malignan*:ti,ab OR carcinoma:ti,ab                                                                                                                                                                                                                                                                                                                                                                                                                                                                                                                                                                                                                                                                                                                                                                                                                                                                                                                                                                                                                                                                                                                                                                                                                                                                                                                                                                                                                                                                |
| 2. Delay                                | barrier*:ti,ab OR delay*:ti,ab OR access:ti,ab OR late:ti,ab OR<br>interval:ti,ab                                                                                                                                                                                                                                                                                                                                                                                                                                                                                                                                                                                                                                                                                                                                                                                                                                                                                                                                                                                                                                                                                                                                                                                                                                                                                                                                                                                                                                                                                    |
| 3. Diagnosis and<br>treatment<br>ti, ab | diagnos*:ti,ab OR presentation:ti,ab OR intervention:ti,ab<br>OR referral:ti,ab OR consult*:ti,ab OR treatment:ti,ab OR<br>therap*:ti,ab                                                                                                                                                                                                                                                                                                                                                                                                                                                                                                                                                                                                                                                                                                                                                                                                                                                                                                                                                                                                                                                                                                                                                                                                                                                                                                                                                                                                                             |
| 4. Sub-Saharan Africa<br>ti, ab         | angola:ti,ab OR benin:ti,ab OR botswana:ti,ab OR 'burkina<br>faso':ti,ab OR burundi:ti,ab OR cameroon:ti,ab OR<br>cameron:ti,ab OR 'cape verde':ti,ab OR 'cabo verde':ti,ab OR<br>'central african republic':ti,ab OR 'ubangi shari':ti,ab OR<br>chad:ti,ab OR comoros:ti,ab OR 'comoro islands':ti,ab OR<br>'iles comores':ti,ab OR 'congo brazzaville':ti,ab OR 'congo<br>democratic republic':ti,ab OR 'democratic republic<br>congo':ti,ab OR congo:ti,ab OR zaire:ti,ab OR 'cote<br>divoire':ti,ab OR 'cote d ivoire':ti,ab OR 'ivory coast':ti,ab OR<br>djibouti:ti,ab OR 'french somaliland':ti,ab OR 'equatorial<br>guinea':ti,ab OR eritrea:ti,ab OR ethiopia:ti,ab OR gabon:ti,ab<br>OR 'gabonese republic':ti,ab OR gambia:ti,ab OR ghana:ti,ab<br>OR 'gold coast':ti,ab OR guinea:ti,ab OR 'guinea bissau':ti,ab<br>OR kenya:ti,ab OR lesotho:ti,ab OR basutoland:ti,ab OR<br>liberia:ti,ab OR madagascar:ti,ab OR malagasy:ti,ab OR<br>malawi:ti,ab OR nyasaland:ti,ab OR mali:ti,ab OR<br>mauritania:ti,ab OR mauritius:ti,ab OR mozambique:ti,ab OR<br>namibia:ti,ab OR niger:ti,ab OR nigeria:ti,ab OR réunion:ti,ab<br>OR rwanda:ti,ab OR ruanda:ti,ab OR 'sao tome':ti,ab OR<br>'principe':ti,ab OR senegal:ti,ab OR seychelles:ti,ab OR<br>'sierra leone':ti,ab OR somalia:ti,ab OR 'south africa':ti,ab OR<br>'south sudan':ti,ab OR sudan:ti,ab OR swaziland:ti,ab OR<br>tanzania:ti,ab OR tanganyika:ti,ab OR togo:ti,ab OR 'togolese<br>republic':ti,ab OR uganda:ti,ab OR zambia:ti,ab OR<br>zimbabwe:ti,ab OR africa:ti,ab OR african:ti,ab |
| 5. Qualitative search<br>terms          | qualitative*:ti,ab OR narrative*:ti,ab OR interview*:ti,ab OR<br>focus group*:ti,ab OR grounded theory*:ti,ab                                                                                                                                                                                                                                                                                                                                                                                                                                                                                                                                                                                                                                                                                                                                                                                                                                                                                                                                                                                                                                                                                                                                                                                                                                                                                                                                                                                                                                                        |

1  
2  
3  
4  
5  
6  
7  
8  
9  
10  
11  
12  
13  
14  
15  
16  
17  
18  
19  
20  
21  
22  
23  
24  
25  
26  
27  
28  
29  
30  
31  
32  
33  
34  
35  
36  
37  
38  
39  
40  
41  
42  
43  
44  
45  
46  
47  
48  
49  
50  
51  
52  
53  
54  
55  
56  
57  
58  
59  
60

Appendix 2. Data extraction

| Title, Author, Year of publication                                                                                                                          | Cancer type                                                                                                                                                                                                                         | Setting Country   | Data collection timeframe              | Participants | Sample size and design                    | Patient factors                                                                                                                                                                                                                                                                                                                                                         | Distance from hospital                                                                                                                                                                                                                                                                             | Reasons for delay and outcomes                                                                                                                                                                                                                                                                                                                                                                                                                                                                                                                                                                                                                                                                                                                                                                                                                                                                                                                                                                                                                                                                                                                                                                                                                                                                                                                                                                                                                                                                                                                                                                                                                                                                                                                                                                                                                                                                          |
|-------------------------------------------------------------------------------------------------------------------------------------------------------------|-------------------------------------------------------------------------------------------------------------------------------------------------------------------------------------------------------------------------------------|-------------------|----------------------------------------|--------------|-------------------------------------------|-------------------------------------------------------------------------------------------------------------------------------------------------------------------------------------------------------------------------------------------------------------------------------------------------------------------------------------------------------------------------|----------------------------------------------------------------------------------------------------------------------------------------------------------------------------------------------------------------------------------------------------------------------------------------------------|---------------------------------------------------------------------------------------------------------------------------------------------------------------------------------------------------------------------------------------------------------------------------------------------------------------------------------------------------------------------------------------------------------------------------------------------------------------------------------------------------------------------------------------------------------------------------------------------------------------------------------------------------------------------------------------------------------------------------------------------------------------------------------------------------------------------------------------------------------------------------------------------------------------------------------------------------------------------------------------------------------------------------------------------------------------------------------------------------------------------------------------------------------------------------------------------------------------------------------------------------------------------------------------------------------------------------------------------------------------------------------------------------------------------------------------------------------------------------------------------------------------------------------------------------------------------------------------------------------------------------------------------------------------------------------------------------------------------------------------------------------------------------------------------------------------------------------------------------------------------------------------------------------|
| Impact of Essential Medicine Stock Outs on Cancer Therapy Delivery in a Resource-Limited Setting. Yehoda M. Martel, 2019                                    | cervical breast prostate esophageal lung uterine ovarian colorectal head and neck cancers Kaposi sarcoma                                                                                                                            | Hospital Botswana | 1st January 2016 to 31st December 2016 | Patients     | 286 Retrospective cohort                  | Male 77<br>Female 180<br>Unknown 29<65yrs =217<br>> 65yrs=61<br>Unknown =8                                                                                                                                                                                                                                                                                              |                                                                                                                                                                                                                                                                                                    | -each week of stock out was strongly associated with a suboptimal therapy delivery event AL1(OR, 1.81; 95% CI, 1.62 to 2.02).<br>-Every week of stock-out duration was associated with an almost two-fold increased risk of a suboptimal therapy delivery event (OR, 1.9; 95%CI, 1.7 t 2.13;P,.001).<br>- patients receiving treatment regimens for colon (OR, 6.34;95% CI, 3.11 to 12.9;P,.001) or rectal cancer (OR, 7.07;95% CI, 1.83 to 27.3;P=.004) were at the highest risk of an event after adjusting for stock out, whereas those with prostate cancer were less likely than their counterparts to experience a suboptimal therapy delivery event (adjusted OR, 0.24; 95% CI, 0.08 to 0.79;P=.019<br>1.1048576 -The measured exposure was chemotherapy stock out, quantified as the duration of chemotherapy stock out within a cycle interval.<br>-Stock-out duration was calculated by counting the days from the date the drug was out of stock to the date it was recorded as being back in stock.<br>-The primary outcome, suboptimal therapy delivery, was defined as any of the following events: any dose reduction, at least 1-week delay in receipt of therapy, any missed dose, and any switch in intended therapy.<br>- A majority of the patients with stage information had either stage III or IV disease. Of patients with known intent of treatment, 51% were receiving curative regimens and 49% were receiving noncurative regimens-chemotherapy stock outs                                                                                                                                                                                                                                                                                                                                                                                                                 |
| Patient Factors Associated With Delays in Obtaining Cancer Care in Botswana. Rhine K Bhatia 2018                                                            | All cancers Cervical 90 (42.3%) Breast 34 (16.0%) Head and neck 34 (16.0%) Vulvar 15 (7.04%) Kaposi's sarcoma 14 (6.7%) Endometrial 7 (3.3%) Penile 5 (2.4%) Anal 5 (2.4%) Oesophageal 5 (2.4%) Lymphoma 3 (1.4%) Prostate 1 (0.5%) | Hospital Botswana | December 2015- January 2017            | Patients     | 214 Questionnaire                         | not stated not stated<br>Single 132 (62.9%)<br>Married 47 (22.4%)<br>serious or live-in 16 (7.7%)<br>Separated/ widowed 15 (7.1%)<br>None 28 (16.2%)<br>Primary 59 (34.1%)<br>Secondary 70 (40.5%)<br>Tertiary or above 16 (9.3%)<br>Women 173 (81.3%)<br>Men 41 (19.2%)<br>median age of 46 years (21-95 years)                                                        | 5-50 km 67 (32.7)<br>51-200 km 61 (29.8)<br>201-400 km 34 (16.6)<br>400 km 43 (30.0)                                                                                                                                                                                                               | English literacy: Can read in English, p=0.042 OR 2.32; Cancer diagnosis site: Breast p=0.017 OR 3.73; Head and neck p=0.017 OR 93.73;Predominantly female cancer p=0.015 OR 0.452; Relationship status: separated/widowed p=0.032 OR 0.34;Appraisal delay: Female sex p=0.032 OR 0.45; Education level: primary schooling p=0.057 OR 0.367; Distance from PMH (201-400 km) p=0.056 OR 2.5; Cancer diagnosis site Kaposi sarcoma p<.001 OR 9.77; Penile cancer p=0.029 OR 8.14; Symptom severity A little serious p=0.001 OR 0.14; Very serious p=0.020 OR 0.402;Predominantly female cancer p=0.005 OR 0.4 ; Help-seeking delay No. of family members: 4-10 p=0.03 OR 0.314; Symptom severity: very serious p=0.012 OR 0.384; Cancer diagnosis site: Vulvar p=0.055 OR 2.97; Kaposi sarcoma p=0.011 OR 4.68;Beliefs:<br>- declining treatment: getting cancer is part of God's plan p=0.0416 - 28/115 (2.74%)<br>Appraisal<br>- sex, p=0.030: male 16 (39%); female 39 (22.5%)<br>- severity of symptoms, p=0.006: not serious 22 (44.9%); a little serious 4 (10.3%); moderately serious 5 (21.7%); serious 5 (23.8%) very serious 19 (24.7%)<br>- cancer site, p=0.011: Cervical 14 (15.6%); Vulvar 5 (33.3%); Anal 1 (20%); Head and neck 9 (26.5%); Penile 3 (60%); Breast 8 (23.5%); Lymphoma 2 (66.7%) Oesophageal 2 (40%) Kaposi sarcoma 9 (64.3%) Endometrial 2 (28.6%) Prostate 0<br>- age, p=0.496<br>Fears<br>- Scared of telling people that I am sick, p=0.006 4/213 (0.212%)<br>- Scared of job loss, p=0.002 6/171 (90.22%)<br>- Scared of surgery p=0.0415 8/206 (0.378%)<br>- Scared of radiation therapy p=0.0253 8/211 (0.352%)<br>- Scared of chemotherapy p=0.0339 12/213 (0.420%)<br>- Scared of missing family commitments as a result of treatment p=0.0061 4/210 (0.212%)<br>- Scared of death p=0.0169 13/213 (0.392%)<br>Beliefs<br>- death is near p=0.0406 9/210 (0.393%) |
| Factors related to advanced stage of cancer presentation in Botswana Chidima Anakwenze 2018                                                                 | Response rate 99.53% n=220. cervical 90 breast 32 , head and neck 42 , vulvar 15, kaposi sarcoma 14, endometrial 7, penile 6, anal 5, esophageal 5, lymphoma 3 prostate 1                                                           | Hospital Botswana | December 2015 to January 2017          | Patients     | 214 Questionnaire                         | Single early 41 (19.5%) late 40 (19.0%) unknown =51 (24.3%)<br>Married/in a serious relationship early 9 (4.3%) late 24 (11.4%) unknown 22 (10.5%)<br>Living with a partner early 3 (1.4%) late 4 (1.9%) stage 1 (0.5%)<br>Divorced/separated/widowed early 3 (1.4%) late 6 (2.9%)<br>No formal education early 6 (3.4%) late 11 (6.3%) unknown 11 (6.3%)               | 5-50 km early 15 (7.3%) late 29 (14.1%) unknown =23 (11.2%)<br>51-200km early 20 (9.7%) late 19 (9.2%) unknown 22 (10.7%)<br>201-400km early 12 (5.8%) late stage 7 (3.4%) unknown 15 (7.3%)<br>> 400 early 9 (4.4%) late 19 (9.2%) unknown 15 (7.3%)<br>Unable to locate village unknown 1 (0.5%) | -not afraid of having cancer OR, 3.48; P < .05<br>-no family to care during treatment OR, 6.35; P = .05<br>-could not afford to develop cancer (OR, 2.73; P < .05)<br>-belief use of contraceptive pills or injections causes cancer OR (0.72 P=0.02)<br>-belief using hormone replacement pills after menopause can cause cancer OR (0.96 p=0.01)-Transportation problems;<br>-Dependent on others for transportation                                                                                                                                                                                                                                                                                                                                                                                                                                                                                                                                                                                                                                                                                                                                                                                                                                                                                                                                                                                                                                                                                                                                                                                                                                                                                                                                                                                                                                                                                  |
| Factors associated with delays to surgical presentation in North-West Cameroon Chao Long 2015                                                               | -skin -breast -colorectal -gynecologic -anal                                                                                                                                                                                        | Hospital Cameroon | 23rd June 2014 - 5th August 2014       | Patients     | 220 Other: cross sectional                | -less than primary school completed 37(16.8%)<br>-completed primary school 115 (52.3%)<br>-secondary school or higher education completed 68 (30.9%)<br>134 Males 86 females<br>-cancer cohort had 19 males and 40 females<br>15 to 20 yrs 4<br>21 to 29 yrs 7<br>30 to 39 yrs 7<br>40 to 49 yrs 8<br>50 to 59 yrs 14<br>60 to 69 yrs 13<br>70 to 79 yrs 5<br>80+ yrs 1 |                                                                                                                                                                                                                                                                                                    | -thought another health care provider could provide adequate or better care<br>-Lack of knowledge about MBH hospital<br>-cost of hospital fees<br>-need for first aid/emergency care at the nearest facility<br>-inability to participate in care decisions due to mental state<br>-transportation<br>-inability to take time from work/commitments<br>-belief that they were not sick enough<br>-belief that they could treat themselves                                                                                                                                                                                                                                                                                                                                                                                                                                                                                                                                                                                                                                                                                                                                                                                                                                                                                                                                                                                                                                                                                                                                                                                                                                                                                                                                                                                                                                                               |
| Late-Stage Diagnosis and Associated Factors Among Breast Cancer Patients in South and Southwest Ethiopia: A Multicenter Study Aragaw Tesfaw 2020            | Breast                                                                                                                                                                                                                              | Regional Ethiopia | January 2013 - December 2017           | Patients     | 426 Retrospective cohort                  | not stated not stated<br>Male 28 (6.6%)<br>Female 398 (93.4%)<br>mean 42.78 +/-13.4                                                                                                                                                                                                                                                                                     | not stated                                                                                                                                                                                                                                                                                         | -breast lump or mass as the chief complaint were 3 times more likely to be diagnosed with late-stage disease than those who did not (AOR= 3.01; 95% CI, 1.49-6.07)<br>late-stage disease: rural communities 224 patients (73%), urban areas 85(28%)<br>female patients (74.4%), male patients 46.4%<br>-long patient delay 240 patients (77.2%)<br>-long total delay vs short total delay (77.4% vs. 67.3%, respectively, P<.05)<br>not stated not stated not stated not stated                                                                                                                                                                                                                                                                                                                                                                                                                                                                                                                                                                                                                                                                                                                                                                                                                                                                                                                                                                                                                                                                                                                                                                                                                                                                                                                                                                                                                         |
| Factors associated with delayed diagnosis of cervical cancer in tikur anbesa specialized hospital, Ethiopia, 2019: Cross-sectional study Shegaw Zeleke 2021 | Cervical                                                                                                                                                                                                                            | Hospital Ethiopia | not stated                             | Patients     | 410 Other: case note review and interview | Farmer 182 (44.4%)<br>Governmental 27 (6.6%)<br>Private 54 (13.2%)<br>Unemployed 147 (35.9%)<br>not stated Married 285 (69.5%)<br>Single 11 (2.7%)<br>Divorced 36 (8.8%)<br>Widowed 78 (19.0%)<br>Cannot read and write 205 (50%)<br>100% Female<br>mean age 50 years (+/- 11.5)                                                                                        | <100 km 106 25.9%<br>>100 km 304 74.1%                                                                                                                                                                                                                                                             | not stated not stated not stated not stated- Accept as cancer cannot heal<br>-Go to traditional healers<br>-Difficulty of decision<br>-Can be healed by itself<br>-Given priority for other diseases<br>-Embarrassment<br>-Unawareness of cervical cancer health service access                                                                                                                                                                                                                                                                                                                                                                                                                                                                                                                                                                                                                                                                                                                                                                                                                                                                                                                                                                                                                                                                                                                                                                                                                                                                                                                                                                                                                                                                                                                                                                                                                         |





1  
2  
3  
4  
5  
6  
7  
8  
9  
10  
11  
12  
13  
14  
15  
16  
17  
18  
19  
20  
21  
22  
23  
24  
25  
26  
27  
28  
29  
30  
31  
32  
33  
34  
35  
36  
37  
38  
39  
40  
41  
42  
43  
44  
45  
46  
47  
48  
49  
50  
51  
52  
53  
54  
55  
56  
57  
58  
59  
60

|                                                                                                                                                              |                                                                                     |                |                                   |                                    |                                                                                                                           |                                                                                                                                                                                                                                                                                                                                                                                                                                                                                                       |             |                                                                                                                                                                                                                                                                                                                                                                                                                                                                                                                                                                                                                                                                                                                                                                                                                                                                                                                               |
|--------------------------------------------------------------------------------------------------------------------------------------------------------------|-------------------------------------------------------------------------------------|----------------|-----------------------------------|------------------------------------|---------------------------------------------------------------------------------------------------------------------------|-------------------------------------------------------------------------------------------------------------------------------------------------------------------------------------------------------------------------------------------------------------------------------------------------------------------------------------------------------------------------------------------------------------------------------------------------------------------------------------------------------|-------------|-------------------------------------------------------------------------------------------------------------------------------------------------------------------------------------------------------------------------------------------------------------------------------------------------------------------------------------------------------------------------------------------------------------------------------------------------------------------------------------------------------------------------------------------------------------------------------------------------------------------------------------------------------------------------------------------------------------------------------------------------------------------------------------------------------------------------------------------------------------------------------------------------------------------------------|
| Why do breast cancer patients report late or abscond during treatment in Ghana? A pilot study. J. Clegg-Lamprey 2009                                         | breast                                                                              | Hospital Ghana | September 2007 - July 2008        | Patients                           | 101 Questionnaire                                                                                                         | -Single new patients 13 (19%), defaulters 2 (5.7%)<br>-Married patients 38 (57.7%), defaulters 32 (88.6%)<br>-Divorced/separated new patients 3 (4.2%), defaulters 2 (5.8%)<br>-Widowed new patients 22 (18.2%) - Nil New patients 11 (16%), defaulters 5 (14.3%)<br>- Primary new patients 15 (22.7%), defaulters 5 (14.3%)<br>-Secondary new patients 18 (27.3%), defaulters 20 (57.1%)<br>- Tertiary new patients 22 (33.3%) 5 (14.3%) defaulters 101 women-new patients: mean 44.8, median 43 yrs |             | Defaulters<br>- fear of mastectomy 20 (57.1%),<br>-Herbal treatment 13 (37.1%),<br>-Financial incapability 11 (31.4%),<br>-Prayers and Prayer camps 10 (28.6%),<br>-Chinese medication 5 (14.3%)<br>-observing 3 (8.6%)<br>-Ulcer healed. Thought disease was healed 2 (5.7%),<br>-Had complete clinical response 2 (5.7%),<br>-food supplement 2 (5.7%),<br>-exercising faith 2 (5.7%)<br>-Side effects of drugs 1 (2.9%)<br>- Pressure from in-laws to refuse mastectomy 1(2.9)<br>- Father refused treatment 1 (2.9%),<br>-family commitments ( 2.9%),<br>-acupuncture treatment at 1 (2.9%) -previous medical consultation 26 (29.4%)<br>-Financial incapability<br>New patients<br>-ignorance 19 (28.8%),<br>-fear of mastectomy 16 (24.2%),<br>-herbal treatment 13(19.7%),<br>-prayers and prayer camps 13(19.7%),<br>-financial incapability 12 (18.2%),<br>-fear of diagnosis 7 (10.6%),<br>-other spiritual 6(9.1%) |
| Factors contributing to delays in diagnosis of breast cancers in Ghana, West Africa Louise Brinton 2016                                                      | Breast cancer                                                                       | Regional Ghana |                                   | Patients                           | 1184 Questionnaire                                                                                                        | 1184 women<40 246 (20.8%)<br>40-44 158 (13.3%)<br>45-49 188 (15.9%)<br>50-54 167 (14.1%)<br>55-59 150 (12.7%)<br>60-64 113 (9.5%)<br>65-69 63 (5.3%)<br>>70 = 95 (8.0%)<br>Unknown = 4 (0.3%)                                                                                                                                                                                                                                                                                                         |             | Other predictors of large tumours are seeking assistance from someone other than a doctor or nurse for breast symptoms (2.65, 1.31, Ai5.40). - low education having an OR of 2.11 (95% CI1.47-3.04)<br>divorced/separated OR 1.65 (1.15-2.37) or widowed women OR 2.16 (1.42-3.28)<br>-Consulting a traditional healer and using traditional medication                                                                                                                                                                                                                                                                                                                                                                                                                                                                                                                                                                       |
| Financial barriers related to breast cancer screening and treatment: A cross-sectional survey of women in Kenya Sujha Subramanian 2019                       | Breast                                                                              | Regional Kenya | November 2017 to April 2018       | Patients                           | 800 Questionnaire                                                                                                         | with BC 132 without BC 258 -<br>Never married: With BC 41 without 79<br>-Married/ living together: With BC 244 without 226<br>-Divorced/ separated: With BC 68 without 63<br>-Widowed: With BC 46 without 30<br>-Missing: With BC 41 without 2 -<br>None:With BC 10; Without 6<br>- Primary: With BC 136 Without 101<br>- Secondary/Vocational: With BC 149 Without 154<br>-College05: With BC 70 Without 109<br>-University:With BC 32 Without 26                                                    |             | -Cost of going to the doctor 46.3%<br>-Inability to discuss symptoms confidently 10.0%<br>-Difficulties setting up appointment 9.8%<br>-Communication barriers 6.5%<br>-Fear of wasting the doctor's time 3.3%<br>-Transportation barriers 23.3%<br>-Transportation barriers 23.3%<br>-Busy schedule 9.0%<br>-Disapproval of family and friends 3.8%<br>-Embarrassment 6.5%<br>-Fear of what the doctor might find 19.3%<br>-General fear of the doctors visit 19.3%                                                                                                                                                                                                                                                                                                                                                                                                                                                          |
| Patient factors affecting successful linkage to treatment in a cervical cancer prevention program in Kenya: A prospective cohort study Charlotte M Page 2019 | cervical cancer                                                                     | Regional Kenya | February - October 2018           | Community                          | 505 Other: prospective cohort                                                                                             | No 214(42%)<br>Yes 291(58% not stated)Not partnered 132(27%)<br>Partnered 366 (73%)Primary school or less 428 (85%)<br>At least some secondary 77 (15%)100% femalemedian 33 (27-42)                                                                                                                                                                                                                                                                                                                   | 8 km (5-12) | not stated- primary school education or less<br>-women who did not miss work to come to CHC<br>not statednot statednot statednot stated                                                                                                                                                                                                                                                                                                                                                                                                                                                                                                                                                                                                                                                                                                                                                                                       |
| Prevalence and Capacity of Cancer Diagnostics and Treatment: A Demand and Supply Survey of Health-Care Facilities in Kenya Francis W Wambalaba 2019          | Cervix, Breast, Esophagus, Prostate, Ovary, Colon, Thyroid, Pancreatic, Lung, Liver | National Kenya | November 2013 - February 2014     | Other: Patients and administrators | 1048 Other: - patient data from records<br>interviews with volunteer patients -survey data from hospital medical officers | not stated<br>not statednot statednot stated<br>Female 57%<br>Male 43%Female 52 years<br>Men 62 years                                                                                                                                                                                                                                                                                                                                                                                                 | not stated  | not statednot statednot stated- preventive services limited not statednot stated                                                                                                                                                                                                                                                                                                                                                                                                                                                                                                                                                                                                                                                                                                                                                                                                                                              |
| Delayed presentation of breast cancer patients. E.S. Otieno 2010                                                                                             | Breast                                                                              | Hospital Kenya | 1 October 2003 to 31st March 2006 | Patients                           | 166 Questionnaire                                                                                                         | 98.8% femalemean age 47, age range 17 to 88                                                                                                                                                                                                                                                                                                                                                                                                                                                           |             | -Reassured that their condition was benign by the first medical personnel they visited 40 (24.1% cumulative %24.1)-Painless symptomatology 39 ( 23.5%, cumulative% 47.6)<br>-Not aware of the disease 13 ( 7.8%, cumulative % 84.9)<br>-Worried they would be diagnosed with cancer 33 (19.9%, cumulative % 67.5)<br>-Attending to traditional healers and taking herbal preparations 16 (9.6% cumulative % 77.1)                                                                                                                                                                                                                                                                                                                                                                                                                                                                                                             |
| Health system organisation and patient pathways: breast care patients' trajectories and medical doctors' practice in Mali Kirsten Grosse Frie 2019           | Breast                                                                              | Regional Mali  | 1 January 2016 - April 2016       | Patients and clinicians            | 124 Questionnaire                                                                                                         | Housewife 55 (44.4%);<br>Public service 19 (15.3%);<br>Business 9 (7.3%);<br>Student 9 (7.3%);<br>Other 32 (25.8%) not statedMarried 83 (66.9%)<br>Single 14 (11.3%)<br>Divorced 7 (5.6%)<br>Widowed 20 (16.1%)not stated100% female16-24 42 (33.9%);<br>35-49 47 (37.9%);<br>50-80 35 (28.2%)                                                                                                                                                                                                        | not stated  | -community healthcare centres and private clinics first contact<br>n/a-Having someone in the family with breast cancer was also associated with a delay of >6 months in acknowledging breast symptoms (p=0.028).- knowledge about breast n/a-no health insurance<br>-traditional healer                                                                                                                                                                                                                                                                                                                                                                                                                                                                                                                                                                                                                                       |

|   |                                                                                                                                                                                          |                                                                                           |                                                    |                                 |          |                       |                                                                                                                                                                                                                                                                                                                                                                                                                                                                                         |                                                                                 |                                                                                                                                                                                                                                                                                                                                                                                                                                                                                                                                                                                                                                                                                                                                                                                                                                                                                                                                                                                                                                                                                                                                                                                                                                                                                                                                                                                                                                                                                                                                                                                                                                                                                                                                                                                                                                                                         |
|---|------------------------------------------------------------------------------------------------------------------------------------------------------------------------------------------|-------------------------------------------------------------------------------------------|----------------------------------------------------|---------------------------------|----------|-----------------------|-----------------------------------------------------------------------------------------------------------------------------------------------------------------------------------------------------------------------------------------------------------------------------------------------------------------------------------------------------------------------------------------------------------------------------------------------------------------------------------------|---------------------------------------------------------------------------------|-------------------------------------------------------------------------------------------------------------------------------------------------------------------------------------------------------------------------------------------------------------------------------------------------------------------------------------------------------------------------------------------------------------------------------------------------------------------------------------------------------------------------------------------------------------------------------------------------------------------------------------------------------------------------------------------------------------------------------------------------------------------------------------------------------------------------------------------------------------------------------------------------------------------------------------------------------------------------------------------------------------------------------------------------------------------------------------------------------------------------------------------------------------------------------------------------------------------------------------------------------------------------------------------------------------------------------------------------------------------------------------------------------------------------------------------------------------------------------------------------------------------------------------------------------------------------------------------------------------------------------------------------------------------------------------------------------------------------------------------------------------------------------------------------------------------------------------------------------------------------|
| 1 | Geospatial barriers to healthcare access for breast cancer diagnosis in sub-Saharan African settings: The African Breast Cancer, AIDisparities in Outcomes Cohort Study Kayo Togawa 2020 | Breast                                                                                    | Hospital<br>Namibia<br>Nigeria<br>Uganda<br>Zambia | September 2014 - September 2017 | Patients | 1518 Other: Interview | not stated not stated<br>Primary school or less 681 (45%)<br>Secondary/high school 509 (34%)<br>Technical/university 328 (22%)<br>100% women<br>mean 50 years +/- 13 19-97                                                                                                                                                                                                                                                                                                              | not clear                                                                       | not stated<br>- rural residence OR:1.40, 95% CI: 1.06-1.84<br>- distance (OR per 50 km increment OR = 1.04, 95% CI: 1.00-1.09, P 0.048) not stated-Cost of diagnostic tests/treatment -Transport<br>-Hospital too far<br>-Difficulty with making an appointment or reaching doctor<br>-Other obligations/no permission from family member<br>-Embarrassment<br>-Pain or discomfort<br>-Fear of dying/treatment<br>-No trust in medicine/prefer traditional healer                                                                                                                                                                                                                                                                                                                                                                                                                                                                                                                                                                                                                                                                                                                                                                                                                                                                                                                                                                                                                                                                                                                                                                                                                                                                                                                                                                                                       |
| 2 | Prevalence and Pattern of Late-Stage Presentation in Women with Breast and Cervical Cancers in Lagos University Teaching Hospital, Nigeria. Opeyemi Awofeso 2018                         | Breast 85<br>Cervical 20                                                                  | Hospital<br>Nigeria                                | April to June 2016              | Patients | 105 Questionnaire     | Not stated <N9000 57 (54.3%)<br>N9001-N18,000 24 (22.9%)<br>N18,001-N50,000 15 (14.3%)<br>N50,001-N90,000 7 (6.7%)<br>N90,001-N150,000 1 (1.0%)<br>N90,001-N150,000 1 (1.0%)<br>N150,000 1 (1.0%)<br>Single 4 (3.8%)<br>Married 86 (81.9%)<br>Divorced/separated 3 (2.9%)<br>Widowed 12 (11.4%)<br>None 7 (6.7%)<br>Primary 26 (31.4%)<br>Secondary 33 (31.4%)<br>Post secondary 39 (37.1%)<br>Females: 105 (100%)<br>All - mean age                                                    | <30 min 3 (2.9%)<br>30 min-1h 23 (21.9%)<br>1-2 h 26 (24.8%)<br>>2 h 53 (50.5%) | -Systemic delay $\chi^2$ 8.1 p=0.0174-Patient delay $\chi^2$ 8.5p=0.0363<br>-Misdiagnosis at lower levels of health care $\chi^2$ 7.11 p=0.0077<br>-Delayed investigation time $\chi^2$ 14.88 p=0.0001<br>-Ignorance and lack of personal initiative $\chi^2$ 5.07 p= 0.0243<br>-unavailability of appropriate treatment modality-investigation time at first contact<br>-misdiagnosis at lower levels-ignorance and lack of personal initiative<br>-preference for alternative medicine<br>-fear<br>-myths and misconceptions                                                                                                                                                                                                                                                                                                                                                                                                                                                                                                                                                                                                                                                                                                                                                                                                                                                                                                                                                                                                                                                                                                                                                                                                                                                                                                                                          |
| 3 | Effect of Sociodemographic Variables on Patient and Diagnostic Delay of Breast Cancer at the Foremost Health Care Institution in Nigeria. Sunday O Olowe 2019                            | breast                                                                                    | Hospital<br>Nigeria                                | August - October 2018           | Patients | 275 Questionnaire     | Unemployed 124 (45.1%)<br>Employed 151 (54.9%)<br><18,000 99 (36%)<br>>18,000 176 (64%)<br>Single 12 (4.4%)<br>Married 193 (70.2%)<br>Divorced/separated 19 (6.9%)<br>Widowed 51 (18.5%)<br>Primary 46 (16.7%)<br>Secondary 87 (31.6%)<br>Tertiary 142 (51.6%)<br>100% female<br>mean 49 +/- 11.9                                                                                                                                                                                       | not stated                                                                      | not stated marital status p=0.00-Age p=0.023 -ethnicity p=0.024 -marital status p=0.009<br>High cost of medicine 71 (73.2%)<br>Obligations at home 77 (91.7%)<br>High cost of prediagnostic test 69 (82.1%)<br>Earlier alternative treatment 66 (78.6%)<br>High cost of transportation 13 (15.5%)<br>Obligations at home 75 (77.3%)<br>High cost of transportation 74 (76.3%)<br>Stigma of disease 71 (73.2%)<br>Denial or anxiety 71 (73.2%)<br>Fear of seeking medical advice 69 (71.1%)<br>Earlier alternative treatment 52 (53.6%)<br>Non-awareness of the disease 38 (39.2%)<br>Fear of diagnosis 67 (79.8%)                                                                                                                                                                                                                                                                                                                                                                                                                                                                                                                                                                                                                                                                                                                                                                                                                                                                                                                                                                                                                                                                                                                                                                                                                                                       |
| 4 | Acceptance and adherence to treatment among breast cancer patients in Eastern Nigeria. Stanley N.C. Anyanwu 2011                                                                         | breast                                                                                    | Hospital<br>Nigeria                                | 2004 to 2008                    | Patients | 275 Case note         | primary 215 (80%)<br>high school/tertiary 168 (60%)<br>females 273<br>male 2-30yrs 19 (6.9%)<br>30-39 yrs 74 (26.9%)<br>40-49 yrs 77 (28.0%)<br>50-59 yrs 50 (18.2%)<br>60-69 yrs 39 (14.2%)<br>>70 yrs 16 (5.8%)                                                                                                                                                                                                                                                                       |                                                                                 | - Declined any form of treatment 65 (37.6%)<br>- Accepted single treatment modality 57 (32.9%)<br>- Cost of drugs, laboratory expenses and transportation to the hospital.<br>- No bed space<br>- No relatives to care for them during treatment -distance Distance                                                                                                                                                                                                                                                                                                                                                                                                                                                                                                                                                                                                                                                                                                                                                                                                                                                                                                                                                                                                                                                                                                                                                                                                                                                                                                                                                                                                                                                                                                                                                                                                     |
| 5 | Presentation intervals and the impact of delay on breast cancer progression in a black African population Olayide Agodirin 2020                                                          | Breast                                                                                    | Regional<br>Nigeria                                | June 2017-May 2018              | Patients | 420 Questionnaire     | Not stated<br>married 285 (68%)<br>widow 48 (11.5%)<br>single 23 (5.5%)<br>separat/divorced 7 (1.7389%)<br>unspecified 57 (13.3%)<br>tertiary 144 (34.3%)<br>secondary 124 (29.5%)<br>primary 66 (15.7%)<br>none 79 (18.8%)<br>unspecified 7 (1.7%)<br>420 females (100%)<br>21-30 = 16 (3.8%)<br>31-40 = 92 (22)<br>41-50 = 119 (28.2%)<br>51-60 = (92 22%)                                                                                                                            | Not stated                                                                      | -The PCI (median 106, 13-337) was significantly longer than the HSI (median 42, 7-150), Wilcoxon-Signed Rank test p=0.0001.(paired t-test mean difference 140 ~442 days (95% CI 95-186).<br>-Most respondents disclosed early within 30 days (330 (81, 95% CI 77-85) and consulted FHP within 60 days (230 (60, 95% CI 53-63).<br>-Most respondents had long PCI of > 30 days. 1-7 days in 91(25% (95% CI 20-29), 1-30 days in 134 (36 95% CI 31-41) and > 30 days in 237 out of 377(64 95% CI 59-68).<br>-The SCI was > 90 days in 293 of 401 (73% (95% CI 68-77), 91-180 days in 70 of 401 (17% (95% CI 14-22)and > 180 days in 226 of 401 (56% (95% CI 51-61)<br>-More respondents with big (> 5 cm) tumors received correct advice compared to those with small tumors(Risk difference 5.5% (95% CI 4.0-15).<br>-no associations given- misdiagnosis<br>-strike 4.0 (2.4%)<br>- Navigation in primary care 1.0 (0.6%)<br>-Misdiagnosis/ investigations 46 (27.5%)<br>- financial constraint 33 (19.7%)<br>- family issues 2.0 (1.2%)<br>- reassured by first home person or first health care provider 7.0 (4.2%)<br>- distance 3.0 (1.7%)<br>- financial constraint 18 (10.5%) - ignorance 6 (3.5%)<br>- pregnancy/ lactation/ menopause 8 (4.6%)<br>- thought benign/thought will disappear 50 (29%)<br>- small size 2 (1.2%)<br>- lump only 2 (1.2%)                                                                                                                                                                                                                                                                                                                                                                                                                                                                                                             |
| 6 | Infrastructural challenges lead to delay of curative radiotherapy in Nigeria Jim Leng 2020                                                                                               | - breast (37.5%),<br>- cervical (16.3%),<br>- head and neck (11.9%)<br>- prostate (10.9%) | Hospital<br>Nigeria                                | June 2017 to August 2017        | Patients | 186 Questionnaire     | None 37 (19.9%)<br>Trader 68 (36.6%)<br>Farmer 9 (4.8%)<br>Artisan 23 (12.4%)<br>Professional 38 (20.4%)<br>Other 11 (5.9%)<br>The median monthly income 15,000 naira (5,000-40,000) which converts to approximately 50 dollars per month.<br>Married 162 (87.1%),<br>Widowed 12 (6.5%)<br>Divorced 1(0.5%)<br>Separated 1 (0.5%)<br>Never married 10 (5.4%)<br>None 20 (10.9%)<br>Primary 46 (25.0%)<br>Secondary 52 (28.3%)<br>Vocational/technical 18 (9.8%)<br>In-technical/OND/... |                                                                                 | -Inability to pay time to clinic visit OR=1.99 (1.05 to 3.77) P= .034* Time to radiotherapy treatment OR= 1.85 (0.95 to 3.57) Time to radiotherapy treatment p=.069<br>-Infrastructural factors include;<br>-Machine breakdown time to clinic visit OR=1.39 (0.78 to 2.48) P= .264 Time to radiotherapy treatment OR =2.92 (1.54 to 5.53) P=.001*<br>-Worker strike time to visit clinic OR= 0.65 (0.38 to 1.13) P= .127 Time to radiotherapy treatment OR=2.64 (1.46 to 4.79)P=.001<br>-Power outage time to visit clinic OR=1.88 (0.8 to 4.42) P=.147 Time to radiotherapy treatment OR=2.81 (1.16 to 6.79) P= .022*<br>-Sociocultural factors include;<br>-Lack of knowledge of appropriate medical facility , time to clinic visit OR 4.96 (2.41 to 10.21),P<.001* time to radiotherapy treatment OR=1.92 (0.89 to 4.15) P= .099<br>-Not wanting others to know of sickness time to clinic visit OR 3.63 (1.35 to 9.72) P=.011* Time to radiotherapy treatment OR=1.75 (0.67 to 4.58) P=.253<br>-Tried another treatment first , time to clinic visit OR 2.45 (1.26 to 4.76) P=.008* Time to radiotherapy treatment OR= 1.50 (0.75 to 2.97) P= .248<br>-Fear of treatment , time to clinic visit OR 0.90 (0.5 to 1.63) P= .732 time to radiotherapy treatment OR 0.42 (0.22 to 0.81) P= .009*<br>-Concern over cost of travel for treatment Time to clinic visit OR= 1.19 (0.7 to 2.04) P= .523 time to radiotherapy treatment OR= (0.3 to 0.95) P=.033*<br>-Previous bad experience at hospital, time to clinic visit OR=7.05 (2.15 to 23.12) P= .001* time to radiotherapy treatment OR= 2.19 (0.67 to 7.09) P= .192<br>-treatment might be too expensive<br>- Infrastructural barriers increased the odds of radiotherapy delay<br>- Health care worker strikes<br>- Machine breakdowns<br>- power outages<br>- going out of pocket for their treatment expenses |

1  
2  
3  
4  
5  
6  
7  
8  
9  
10  
11  
12  
13  
14  
15  
16  
17  
18  
19  
20  
21  
22  
23  
24  
25  
26  
27  
28  
29  
30  
31  
32  
33  
34  
35  
36  
37  
38  
39  
40  
41  
42  
43  
44  
45  
46  
47  
48  
49  
50  
51  
52  
53  
54  
55  
56  
57  
58  
59  
60

|                                                                                                                                                                                                  |                                                                                      |                  |                          |                             |                          |                                                                                                                                                                                                                                                                                                                                                                                               |                                                                                                                                                                                        |                                                                                                                                                                                                                                                                                                                                                                                                                                                                                                                                                     |
|--------------------------------------------------------------------------------------------------------------------------------------------------------------------------------------------------|--------------------------------------------------------------------------------------|------------------|--------------------------|-----------------------------|--------------------------|-----------------------------------------------------------------------------------------------------------------------------------------------------------------------------------------------------------------------------------------------------------------------------------------------------------------------------------------------------------------------------------------------|----------------------------------------------------------------------------------------------------------------------------------------------------------------------------------------|-----------------------------------------------------------------------------------------------------------------------------------------------------------------------------------------------------------------------------------------------------------------------------------------------------------------------------------------------------------------------------------------------------------------------------------------------------------------------------------------------------------------------------------------------------|
| Geospatial access predicts cancer stage at presentation and outcomes for patients with breast cancer in southwest Nigeria: A population-based study Gregory C Knapp 2020                         | Breast                                                                               | Hospital Nigeria | May 2009 - January 2019  | Patients                    | 609 Retrospective cohort | not stated<br>Socioeconomic status Low 417 (68.5%) Middle 185 (30.4%) High 7 (1.2%)<br>not stated None 56 (9.3%) Primary 196 (32.4%) Secondary 141 (23.3%) Tertiary 212 (35.0%) Female 598 (98.2%) Male 11 (1.8%) median 49 (40-58)                                                                                                                                                           | not stated                                                                                                                                                                             | not stated- primary education only (21.9%; P= .002)<br>- longer travel times 2.8-fold increased (95% CI, 1.30-6.11; P= .006)<br>not stated not stated not stated not stated                                                                                                                                                                                                                                                                                                                                                                         |
| Complementary and alternative medicine. Use and challenges among gynaecological cancer patients in Nigeria: Experiences in a tertiary health institution - Preliminary results T.O. Nwankwo 2019 | Cervical 42, ovarian 31, endometrial 8, vulva 5, choriocarcinoma 4, leiomyosarcoma 4 | Hospital Nigeria | June 2014 to June 2020   | Patients                    | 95 Questionnaire         | Trader 37 (38.9%) Artisan/farmer 23 (24.2%) Professional/Civil servant 18 (19.0%) Unemployed 17 (17.9%) Income < monthly expenses 59 (62.0%) Income =/ > monthly Expenses 36 (38.0%) Single 13 (13.7%) Married 77 (81.1%) Divorced /separated 5 (5.3%) Primary/non formal 44 (46.3%) Secondary 28 (29.5%) Tertiary 23 (24.2%) 21-30 2 (2.1%) 31-40 17 (17.9%) 41-50 27 (28.4%) >50 49 (51.6%) |                                                                                                                                                                                        | - recommendation from friends and relatives (pvalue = 0.017)<br>- income was less than monthly expenditure<br>- duration of illness was equal or greater than six months pvalue = 0.02, OR = 0.36 CI 0.15-0.86- Complementary and alternative medicine use<br>- Herbs<br>- spiritual sacrifice<br>- diet modification<br>- Chinese medicine<br>- prayers combined with other methods                                                                                                                                                                |
| Effect of sociodemographic variables on patient and diagnostic delay of breast cancer at the foremost health care institution in Nigeria Sunday Olarewaju 2019                                   | Breast                                                                               | Hospital Nigeria | August - October 2018    | Patients                    | 275 Questionnaire        | Unemployed 124 (45.1%) Employed 151 (54.9%) <18,000 99 (36%) >18,000 176 (64%) Single 12 (4.4%) Married 193 (70.2%) Divorced/separated 19 (6.9%) Widowed 51 (18.5%) Primary 46 (15.7%) Secondary 87 (31.6%) Tertiary 142 (51.6%) 100% women Mean 49 +/- 11.9                                                                                                                                  | not stated                                                                                                                                                                             | not stated- marital status, p=00 (single at higher risk of late stage diagnosis)- Age p=0.023<br>- ethnicity p=0.024<br>- marital status p=0.009 High cost of prediagnostic test Obligations at home<br>High cost of transportation n = 97<br>- Obligations at home<br>- High cost of transportation<br>- Stigma of disease<br>- Denial or anxiety<br>- High cost of medicine<br>- Fear of seeking medical advice<br>- Earlier alternative treatment<br>- Nonawareness of the disease                                                               |
| Impact of Primary Care Delay on Progression of Breast Cancer in a Black African Population: A Multicentered Survey Olayide Agodirin 2019                                                         | Breast cancer                                                                        | Regional Nigeria | May 2017 - July 2018     | Patients                    | 237 Questionnaire        | married 167 (70.5%) single 114 (46.6%) divorced or separated 4 (1.7%) widow 22 (9.3%) unspecified 33 (13.9%) tertiary 91 (38.3%) secondary 78 (33%) primary 30 (12.7%) none 38 (16%) <= 30 18 (7.6%) 31-40 51 (21%) 41-50 74 (31.2%) 51-60 46 (19.4%) 61-70 24 (10.1%) >= 71 24 (10.1%)                                                                                                       |                                                                                                                                                                                        | - Misdiagnosis<br>- Misinformation by FHP- Distance to specialist clinic- Fear of treatment most probably mastectomy<br>- Age<br>- Distance to specialist clinic<br>- Need for social acceptability                                                                                                                                                                                                                                                                                                                                                 |
| Health-seeking behavior and barriers to care in patients with rectal bleeding in Nigeria Olusegun I. Alatisie 2017                                                                               | colorectal cancer                                                                    | Hospital Nigeria | 2013 to 2014             | Other: patients, physicians | 127 Questionnaire        | <\$100 =49 (59.8%) >\$101= 33 (40.2%) Married 69= (84.2%) Single 12= (14.6%) Widow 1= (1.2%) -No formal or primary education 23 (28.1%) -Secondary education 27 (32.9%) -Tertiary education 32 (39.0%) Male = 64 (78.1%) Female = 18 (22.0%) <45 =41 (50.6%) >46 =40 (49.4%)                                                                                                                  |                                                                                                                                                                                        | - Hospital bottlenecks<br>- misdiagnosis<br>- Unknown availability or cost of colonoscopy<br>- Not serious<br>- symptom cleared<br>- Embarrassing<br>- Knew the cause<br>- Fear of unknown<br>- No money<br>- Religious beliefs<br>- belief in herbal medicine                                                                                                                                                                                                                                                                                      |
| Determinants of stage at diagnosis of breast cancer in Nigerian women: sociodemographic, breast cancer awareness, health care access and clinical factors Elima Jedy-Agba 2017                   | Breast                                                                               | National Nigeria | January 2014 - July 2016 | Patients                    | 316 Other: Case-control  | not stated Personal income yes early 23 (25.6%) late 67 (74.4%) Personal income no early 74 (35.2%) 136 (64.8%) Married: early 71 (33.6%) late 140 (66.4%) None: early 5 (12.2%) late 36 (87.8%) Primary/Secondary: early 33 (29.2%) late 80 (70.8%) Tertiary/Post graduate (PG): early 59 (41.3%) late 84 (58.7%) Not reported early 0 (0) late 3 (100%) 100% women mean age 45.4 (SD 11.4)  | < 1 hour: early 66 (36.1%) late 117 (63.9%) 1 - < 2 hours: early 15 (33.3%) late 30 (66.7%) >= 2 hours: early 5 (22.7%) late 17 (77.3%) Not reported: early 11 (22.0%) late 39 (78.0%) | - lower educational level (p=0.002);<br>- no formal education 2.75 (95% CI 1.37, 5.52, p=0.004)<br>- In age-adjusted analysis, the odds of later stage were positively associated with the amount of travel time taken by the woman to reach the first healthcare provider she visited (pt=0.04) - never having heard of BC OR=2.24; 95% CI 1.25, 4.03; p=0.01<br>- Women who did not believe in a BC cure (OR=2.23; 95% CI 1.40, 3.56; p=0.001)<br>- did not practice BSE (OR=1.89; 95% CI 1.20, 2.99; p=0.01)<br>not stated not stated not stated |



1  
2  
3  
4  
5  
6  
7  
8  
9  
10  
11  
12  
13  
14  
15  
16  
17  
18  
19  
20  
21  
22  
23  
24  
25  
26  
27  
28  
29  
30  
31  
32  
33  
34  
35  
36  
37  
38  
39  
40  
41  
42  
43  
44  
45  
46  
47  
48  
49  
50  
51  
52  
53  
54  
55  
56  
57  
58  
59  
60

|                                                                                                                                              |                                                 |                              |                                        |                                                                |                                                   |                                                                                                                                                                                                                                                                                                                                                                                                                                                                        |                                                                                                                                                                                                                                                       |                                                                                                                                                                                                                                                                                                                                                                                                                                                                                                                                                                                                                                                                                                                                                                                                                                                                                                                                                                                                                                                                                                                                                                                                                                                                                                                                                                                                                                                                                                                                                                                                                                                                                                                                                                                                                                                                                                                                                                       |
|----------------------------------------------------------------------------------------------------------------------------------------------|-------------------------------------------------|------------------------------|----------------------------------------|----------------------------------------------------------------|---------------------------------------------------|------------------------------------------------------------------------------------------------------------------------------------------------------------------------------------------------------------------------------------------------------------------------------------------------------------------------------------------------------------------------------------------------------------------------------------------------------------------------|-------------------------------------------------------------------------------------------------------------------------------------------------------------------------------------------------------------------------------------------------------|-----------------------------------------------------------------------------------------------------------------------------------------------------------------------------------------------------------------------------------------------------------------------------------------------------------------------------------------------------------------------------------------------------------------------------------------------------------------------------------------------------------------------------------------------------------------------------------------------------------------------------------------------------------------------------------------------------------------------------------------------------------------------------------------------------------------------------------------------------------------------------------------------------------------------------------------------------------------------------------------------------------------------------------------------------------------------------------------------------------------------------------------------------------------------------------------------------------------------------------------------------------------------------------------------------------------------------------------------------------------------------------------------------------------------------------------------------------------------------------------------------------------------------------------------------------------------------------------------------------------------------------------------------------------------------------------------------------------------------------------------------------------------------------------------------------------------------------------------------------------------------------------------------------------------------------------------------------------------|
| Prevalence of breast masses and barriers to care: Results from a population-based survey in Rwanda and Sierra Leone Faustin Ntiringanya 2014 | ***Breast masses not specified if cancer or not | National Rwanda Sierra Leone | October 2011 - January 2012            | Community                                                      | Sierra Leone 3645<br>Rwanda 3175<br>Questionnaire | *women with breast masses<br>Sierra Leone, n=57:<br>None 10 Home maker 7 Domestic help 2 Farmer 26 Self employed/small business 12<br>Rwanda, n=79: None 9 Home maker 0 Domestic help 0 Farmer 70 Self employed/small business 0 not stated<br>not stated<br>stated*women with breast masses<br>Sierra Leone, n=57:<br>None 38 (66.7%)<br>Primary 3 (5.3%)<br>Secondary 14 (24.6%)<br>Tertiary 2 (3.5%)<br>Rwanda, n=79: None 33(41.8%) Primary 44 (55.7%) Secondary 2 | not stated                                                                                                                                                                                                                                            | n/an/an/ not stated-lack of money (Sierra Leone 35.1% Rwanda 11.4%)- absence of disability associated with breast mass<br>-lack of trust in the health care system<br>-long distance required to reach the provider<br>-stigma associated with having a breast problem<br>-consulted traditional healers instead of going to health centers                                                                                                                                                                                                                                                                                                                                                                                                                                                                                                                                                                                                                                                                                                                                                                                                                                                                                                                                                                                                                                                                                                                                                                                                                                                                                                                                                                                                                                                                                                                                                                                                                           |
| Consensus study on the health system and patient-related barriers for lung cancer management in South Africa Witness Mapanga 2021            | Lung                                            | Regional South Africa        |                                        | clinical managers clinicians public health opinion leaders NGO | 27 Delphi process, nominal group technique        | oncologists<br>pulmonologists<br>thoracic surgeons<br>pathologists<br>radiologists<br>oncology nurses<br>medical officers<br>NGO representatives                                                                                                                                                                                                                                                                                                                       |                                                                                                                                                                                                                                                       | - Poor nutrition<br>-Lack of smoking cessation clinics<br>-Costs of medical treatments<br>-Repeated visits for misdiagnoses for TB-patients lose faith in the health system and go to GPs<br>-Failure to come back for follow up diagnostic or treatment appointments<br>-Patients changing their mobile numbers and then cannot be contacted or may not answer their phones from unidentified callers-fearing debt collection.<br>-Patients endure bureaucracy at health care facilities ID, proof of residence, articulation of chief complaint<br>-Language barriers between patients and healthcare practitioners and thus difficult communications and understanding of doctor information<br>-Long delays to get appointments. Long waiting periods in clinics and long queues for high patient volumes and for diagnostic tests compounded by early closing times<br>-Primary health care is nurse driven and doctor supported-lung cancer not prioritized as a diagnosis-and not listed in the index of disease conditions<br>- Misdiagnosis linked with superficial examinations-over emphasis on more common HIV and TB pneumonia with a low index of suspicion for lung cancer<br>-Delays in getting diagnostic workup test results for imaging, cytology, pathology and surgery<br>-Unwillingness for health care workers to consider a cancer diagnosis because of the inability to break bad news and/or accompany the patient through the journey of care<br>-Administration hassles-no referral forms, lack of hospital transport for referrals, obtaining informed consent, booking appointment for referrals<br>-Patient health awareness messaging within primary resources is not structured and sustained with no CHC outreach to the community<br>-Insufficient information on the prevalence of lung cancer and how best to manage it<br>-Using sputum only to diagnose cancer<br>-Biological specimens eg pleural fluid not sent for analysis |
| Delay to diagnosis and breast cancer stage in an urban south african breast clinic S Rayne 2019                                              | Breast                                          | Hospital South Africa        | January 2016 - February 2017           | Patients                                                       | 252 Questionnaire                                 | Unemployed, piece work, student or retired<br>-early stage 55 (34.8%)<br>-locally advanced 103 (65.2%)<br><br>Employed, job<br>- early presentation 17 (27.0%)<br>- advanced locally 46 (73.0%) Only primary school<br>-early presentation 21 (30.4%)<br>-locally advanced 48 (69.6%)<br><br>Secondary school or above<br>- early presentation 52 (34.9%)<br>- locally advanced 97 (65.1%) <45 yrs )                                                                   | Travel to breast clinic:<br>-early stage 12 (30.8%)<br>-locally advanced 27 (69.2%)<br><br>30 minutes - 1 hour<br>-early stage 26 (35.1%)<br>-locally advanced 73 (69.5%)<br><br>1 - 4 hours<br>early stage 26 (35.1%)<br>locally advanced 48 (64.9%) | lack of internet access 51 (35.9%)in early stage and 91(64.1% in late stage) was associated with delay in acknowledging breast symptoms (p=0.051).<br>-work transport<br>-money<br><br>- low education (up to Grade 7)<br>- longer travel time to hospital                                                                                                                                                                                                                                                                                                                                                                                                                                                                                                                                                                                                                                                                                                                                                                                                                                                                                                                                                                                                                                                                                                                                                                                                                                                                                                                                                                                                                                                                                                                                                                                                                                                                                                            |
| From symptom discovery to treatment - women's pathways to breast cancer care: A cross-sectional study Jennifer Moodley 2018                  | Breast                                          | Hospital South Africa        | May 2015 to June 2016                  | Patients                                                       | 201 Questionnaire                                 | Employed 51 (25.4%)<br>Married 84 (41.8%)<br>Single in stable relationship 6 (3.0%)<br>Single 42 (20.9%)<br>Widowed 38 (18.9%)<br>Divorced/separated 31 (15.4)None-Grade 7 49 (24.4%)<br>Grade 8-Grade 11 96 (47.8%)<br>Grade 12+ 56 (27.9%)Female =201median age 54                                                                                                                                                                                                   |                                                                                                                                                                                                                                                       | - surgery as first treatmnt-visiting multiple clinics-first symptom as being minor or not serious, being in denial.<br>only seeking care when a lump increased                                                                                                                                                                                                                                                                                                                                                                                                                                                                                                                                                                                                                                                                                                                                                                                                                                                                                                                                                                                                                                                                                                                                                                                                                                                                                                                                                                                                                                                                                                                                                                                                                                                                                                                                                                                                        |
| Access to colorectal cancer (CRC) chemotherapy and the associated costs in a South African public healthcare patient cohort Candice-lee      | Colorectal                                      | Hospital South Africa        | 2012 - 2014                            | Patients                                                       | 162 Case note                                     | not stated not statednot statednot statedFemale 73 Male 89median 58 years                                                                                                                                                                                                                                                                                                                                                                                              | not stated                                                                                                                                                                                                                                            | not statednot statednot statednot statednot statednot stated                                                                                                                                                                                                                                                                                                                                                                                                                                                                                                                                                                                                                                                                                                                                                                                                                                                                                                                                                                                                                                                                                                                                                                                                                                                                                                                                                                                                                                                                                                                                                                                                                                                                                                                                                                                                                                                                                                          |
| Barriers to early presentation of breast cancer among women in Soweto, South Africa Maureen Joffe 2018                                       | Breast                                          | Hospital South Africa        | 8th January 2015 to 31st December 2016 | Patients                                                       | 499 Questionnaire                                 | Unemployed 229 (45.9%)<br>Employed 136 (27.2%)<br>Retired 134 (26.9%)<br>Single 119 (24.0%)<br>Married/co-habiting 216 (43.6%)<br>Divorced/widowed 161 (32.4%)Completion of informal/primary 142 (28.5%)<br>Completion of high school/any tertiary school 348 (71.5%)Female 499-40 yrs 69 (13.8%)<br>40 -49 yrs 124 (24.8%)<br>50-59 yrs 120 (24.1%)<br>60-69 yrs 102 (20.4%)<br>70 and above 84 (16.8%)                                                               |                                                                                                                                                                                                                                                       | - increase in parity OR1.10,95%CI:0.99-1.21<br>-Patients aged<40years OR=1.93,95%CI:1.05-3.58<br>-Unimial B OR = 1.86, 95% CI:1.10-3.14 and triple negative breast cancer subtypes OR=2.61,95%CI:1.69-4.5.30<br>Clinical waiting time as a barrier n=23 (9.5%) were in early stage while 19 (7.4%) were in late stage. p-value 0.411, chi square 0.675<br>-Most participants 323(64.7%,166 in early stage and 157) referred themselves to CHBAH or were referred directly by a primary care clinic or a private general practitioner, by passing the secondary hospitals. Among those patients,251(77.7%, 143 early stage, 108 late stage) had only one visit prior to diagnosis. Those with more visits before reaching CHBAH were more likely to be diagnosed at a late stage(OR<0.001).<br>-49(15.2%, 18 in early stage, 31 in late stage) had 2 visits self referral /primary health facility<br>->3 visits self referral /primary health facility 23 (7.1%, 5 in early stage and 18 in late stage)<br>-<br>-Fear of diagnosis<br>-Thought it was a minor ailment<br>-No one to look after the children<br>-Worried no money for treatment                                                                                                                                                                                                                                                                                                                                                                                                                                                                                                                                                                                                                                                                                                                                                                                                                        |

|                                                                                                                                                                                               |                                                                                                                                                                                                 |                       |                                 |          |                           |                                                                                                                                                                                                                                                                                                                                                                                                                                       |                                                                                                                                                                             |                                                                                                                                                                                                                                                                                                                                                                                                                                                                                                                                                                                                                                                                                                                                                                                                                                                                                                                                                                                                                                                                                                                                                                                                                                                                                                                                                                                     |                                                                                                                                                                                                                                                                                                           |    |    |    |    |    |    |    |    |    |    |    |    |    |    |    |    |    |    |    |    |    |    |    |    |    |    |    |    |    |    |    |    |    |    |    |    |    |    |    |    |    |    |    |    |    |    |    |    |    |    |
|-----------------------------------------------------------------------------------------------------------------------------------------------------------------------------------------------|-------------------------------------------------------------------------------------------------------------------------------------------------------------------------------------------------|-----------------------|---------------------------------|----------|---------------------------|---------------------------------------------------------------------------------------------------------------------------------------------------------------------------------------------------------------------------------------------------------------------------------------------------------------------------------------------------------------------------------------------------------------------------------------|-----------------------------------------------------------------------------------------------------------------------------------------------------------------------------|-------------------------------------------------------------------------------------------------------------------------------------------------------------------------------------------------------------------------------------------------------------------------------------------------------------------------------------------------------------------------------------------------------------------------------------------------------------------------------------------------------------------------------------------------------------------------------------------------------------------------------------------------------------------------------------------------------------------------------------------------------------------------------------------------------------------------------------------------------------------------------------------------------------------------------------------------------------------------------------------------------------------------------------------------------------------------------------------------------------------------------------------------------------------------------------------------------------------------------------------------------------------------------------------------------------------------------------------------------------------------------------|-----------------------------------------------------------------------------------------------------------------------------------------------------------------------------------------------------------------------------------------------------------------------------------------------------------|----|----|----|----|----|----|----|----|----|----|----|----|----|----|----|----|----|----|----|----|----|----|----|----|----|----|----|----|----|----|----|----|----|----|----|----|----|----|----|----|----|----|----|----|----|----|----|----|----|----|
| 1                                                                                                                                                                                             | 2                                                                                                                                                                                               | 3                     | 4                               | 5        | 6                         | 7                                                                                                                                                                                                                                                                                                                                                                                                                                     | 8                                                                                                                                                                           | 9                                                                                                                                                                                                                                                                                                                                                                                                                                                                                                                                                                                                                                                                                                                                                                                                                                                                                                                                                                                                                                                                                                                                                                                                                                                                                                                                                                                   | 10                                                                                                                                                                                                                                                                                                        | 11 | 12 | 13 | 14 | 15 | 16 | 17 | 18 | 19 | 20 | 21 | 22 | 23 | 24 | 25 | 26 | 27 | 28 | 29 | 30 | 31 | 32 | 33 | 34 | 35 | 36 | 37 | 38 | 39 | 40 | 41 | 42 | 43 | 44 | 45 | 46 | 47 | 48 | 49 | 50 | 51 | 52 | 53 | 54 | 55 | 56 | 57 | 58 | 59 | 60 |
| Factors relating to late presentation of patients with breast cancer in area 2 KwaZulu-Natal, South Africa Sharon R Cacaia 2017                                                               | Breast                                                                                                                                                                                          | Hospital South Africa | 2014                            | Patients | 172 Other: Prospective    | - employed 27% -never attended school 19% - completed high school 19% -Average education level: 6th grade women 172mean age was 56 yrs (range 23 to 100 yrs)                                                                                                                                                                                                                                                                          |                                                                                                                                                                             |                                                                                                                                                                                                                                                                                                                                                                                                                                                                                                                                                                                                                                                                                                                                                                                                                                                                                                                                                                                                                                                                                                                                                                                                                                                                                                                                                                                     | - financial issues<br>-transportation issues<br>-difficulty with the referral system and rural clinics - unaware that the lump could be cancer<br>- did not understand severity<br>- fear<br>- afraid of losing a breast<br>- seeing a traditional healer<br>- financial issues<br>-transportation issues |    |    |    |    |    |    |    |    |    |    |    |    |    |    |    |    |    |    |    |    |    |    |    |    |    |    |    |    |    |    |    |    |    |    |    |    |    |    |    |    |    |    |    |    |    |    |    |    |    |    |
| Stage at breast cancer diagnosis and distance from diagnostic hospital in a periurban setting: A South African public hospital case series of over 1,000 women Caroline Dickens 2014          | Breast                                                                                                                                                                                          | Hospital South Africa | 2006 - 2012                     | Patients | 1071 Retrospective cohort | not stated <5 km from hospital, n=183: <= R9600 - 29.4% <= R800 - 50.3% 5 - 9.9 km from hospital, n=299: <= R9600 - 27.4% <= R800 - 51.2% 10 - 19.9 km from hospital, n=242: <= R9600 - 24.7% <= R800 - 49.3% 20 - 29.9 km from hospital, n=188: <= R9600 - 32.9% <= R800 - 61.0% 30 - 39.9 km from hospital, n=61: <= R9600 - 27% <= R800 - 58% not stated 152 women with primary education or less <5 km from hospital n=183: 14.6% | <5 km from hospital, n=183<br>5 - 9.9 km from hospital, n=299<br>10 - 19.9 km from hospital, n=242<br>20 - 29.9 km from hospital, n=188<br>30 - 39.9 km from hospital, n=61 | Not stated<br>- older patients [RR 1.03(95% CI: 0.99, 1.07)<br>- before 2008 [RR 1.34 (95% CI:1.17, 1.53)<br>- living 30-39km from hospital (95% CI: 11, 75)<br>Not statedNot statedNot statedNot stated                                                                                                                                                                                                                                                                                                                                                                                                                                                                                                                                                                                                                                                                                                                                                                                                                                                                                                                                                                                                                                                                                                                                                                            |                                                                                                                                                                                                                                                                                                           |    |    |    |    |    |    |    |    |    |    |    |    |    |    |    |    |    |    |    |    |    |    |    |    |    |    |    |    |    |    |    |    |    |    |    |    |    |    |    |    |    |    |    |    |    |    |    |    |    |    |
| Predictors of cervical cancer being at an advanced stage at diagnosis in Sudan Ahmed Ibrahim 2011                                                                                             | cervical cancer                                                                                                                                                                                 | Hospital Sudan        | 1 January 2007 to December 2007 | Patients | 197 Retrospective cohort  | not stated not stated Single 60 (30.5%) Married 137 (69.5%)Basic school 122 (61.9%) Secondary school 75 (38.1%)100% female<=54 73 (37.1%) >=55 124 (62.9%)                                                                                                                                                                                                                                                                            | not stated                                                                                                                                                                  | not stated<br>- older (>= 55 years) (OR: 1.03, 95% CI: 1.01-1.05).<br>- Rural residence (OR: 1.13, 95% CI: 1.78-5.50).<br>- African ethnicity (OR: 1.76, 95% CI: 1.01-3.05).<br>- without health insurance (OR: 7.7, 95% CI: 3.76-15.38)not statednot statednot statednot stated                                                                                                                                                                                                                                                                                                                                                                                                                                                                                                                                                                                                                                                                                                                                                                                                                                                                                                                                                                                                                                                                                                    |                                                                                                                                                                                                                                                                                                           |    |    |    |    |    |    |    |    |    |    |    |    |    |    |    |    |    |    |    |    |    |    |    |    |    |    |    |    |    |    |    |    |    |    |    |    |    |    |    |    |    |    |    |    |    |    |    |    |    |    |
| Educational Opportunities for Down-Staging Breast Cancer in Low-Income Countries: an Example from Tanzania Kristen Yang 2019                                                                  | Breast                                                                                                                                                                                          | Hospital Tanzania     | January 2016 - August 2018      | Patients | 196 Questionnaire         | not stated not statednot statednot statedmean age early: 51.5 +/- 10.3 late: 51.6 +/- 12.9                                                                                                                                                                                                                                                                                                                                            | not stated                                                                                                                                                                  | not stated<br>- never had a routine breast exam conducted prior to their diagnosis (OR = 4.40; 95% CI = 2.09-9.25)<br><br>not statednot stated- financial restraints<br>- time restraints not stated                                                                                                                                                                                                                                                                                                                                                                                                                                                                                                                                                                                                                                                                                                                                                                                                                                                                                                                                                                                                                                                                                                                                                                                |                                                                                                                                                                                                                                                                                                           |    |    |    |    |    |    |    |    |    |    |    |    |    |    |    |    |    |    |    |    |    |    |    |    |    |    |    |    |    |    |    |    |    |    |    |    |    |    |    |    |    |    |    |    |    |    |    |    |    |    |
| Patient and disease characteristics associated with late tumour stage at presentation of cervical cancer in northwestern Tanzania Ramadhani Mlunge 2016                                       | Cervical                                                                                                                                                                                        | Hospital Tanzania     | November 2013 - April 2014      | Patients | 202 Questionnaire         | Peasant 170 (84.1%) Petty trader 20 (9.9%) Business 2 (0.9%) Employed 5 (2.4%) Un-employed 5 (2.4%) not statedMarried 110 (54.4%) Single 9 (4.4%) Divorced 10 (4.9%) Separated 39 (19.3%) Widowed 34 (16.8%)Formal 87 (43.1%) None formal (115 (56.9%)100% femalemean 50.5 +/- 13.3 years (25-80 years) <40 45 (22.2%) 40-59 101 (50.0%) >60 56 (27.7%)                                                                               | not stated                                                                                                                                                                  | not stated<br>-Lack of formal education, OR=2.1, 95% CI 1.2 - 3.8, p=0.012<br>-lack of health insurance, OR=3.9, 95% CI 1.1-13.3, p=0.033<br>-three or more pre-referral visits OR=1.9, 95% CI 1.1-3.5, p=0.034<br>- attending to traditional health practitioners OR = 2.3 [95% CI 1.2-4.2],p= 0.011<br>-lack of personal initiative to attend health care facility OR = 2.0 [95% CI 1.0-3.8],p= 0.028) not statedSeeking alternative-health practitionerLack of personal initiative                                                                                                                                                                                                                                                                                                                                                                                                                                                                                                                                                                                                                                                                                                                                                                                                                                                                                               |                                                                                                                                                                                                                                                                                                           |    |    |    |    |    |    |    |    |    |    |    |    |    |    |    |    |    |    |    |    |    |    |    |    |    |    |    |    |    |    |    |    |    |    |    |    |    |    |    |    |    |    |    |    |    |    |    |    |    |    |
| Engagement in HIV Care and Access to Cancer Treatment Among Patients With HIV-Associated Malignancies in Uganda. Daniel H. Low 2019                                                           | HIV associated malignancies: KS (46%) cervical cancer (19%) breast cancer (10%) esophageal cancer (6%) head and neck cancer (5%) non-Hodgkin lymphoma (4%) vulvovaginal cancer (4%) others (6%) | Hospital Uganda       | October 2015 - January 2016     | Patients | 100 Questionnaire         | Employed 34, n=100 not statednot stated=100 Poor literacy 32 Incomplete primary school 36 Complete primary school 18 Some secondary school 30 Complete secondary school 16 Female 52% Male 48% median 41 years                                                                                                                                                                                                                        | ?n=104 < 25 km 24 25-49 km 23 50-99 km 12 >100 km 55                                                                                                                        | -diagnostic delay (44v117 days for those not receiving HIV care;P=.048)- travel to multiple clinics/hospitals (n = 18; 46%),<br>-conflicts between appointments for HIV and cancer care (n = 9; 23%)<br>-treatment costs (n = 8; 21%)<br>-difficulty adhering to the quantity of medications (n = 6; 15%)<br>- stigma<br>- Reporting any barrier to care at follow-up was associated with having prematurely withdrawn from cancer care (36%v0%; 95%CI, 21% to 51%; relative risk not calculable;P=.003<br>-Distance from place of residence to the UCI was not associated with reporting of a barrier to care; however, those who prematurely withdrew from care AE1 lived farther from the UCI than those who completed all prescribed cancer treatment (median distance, 172.5v40 km;P=.056)-Shorter time from recognizing symptoms to initiation of cancer care was associated with having previously established HIV care(P=.04).<br>-Having previously established HIV care reduced appraisal/behavioral delay (30v75 days for those not al-ready receiving HIV care;P=.02)<br>-Persons who were receiving ART before recognizing the symptoms determined to be associated with cancer had a total cascade duration of 207 days(IQR, 109 to 320 days), compared with those not receiving AF3ART (318 days; IQR, 155 to 537 days;P=.004). diagnostic delaynot statednot stated |                                                                                                                                                                                                                                                                                                           |    |    |    |    |    |    |    |    |    |    |    |    |    |    |    |    |    |    |    |    |    |    |    |    |    |    |    |    |    |    |    |    |    |    |    |    |    |    |    |    |    |    |    |    |    |    |    |    |    |    |
| Social, demographic and healthcare factors associated with stage at diagnosis of cervical cancer: cross-sectional study in a tertiary hospital in Northern Uganda. Amos Deogratius Mwaka 2015 | Cervical                                                                                                                                                                                        | Hospital Uganda       | September 2012 to April 2014    | Patients | 149 Questionnaire         | Housewife/peasant 132 (88.6%) Petty trader 10 (6.7%) Formally employed 4 (2.7%) Missing 3 (2.0%) not statedMarried 84 (56.4%) Divorced 21 (14.1%) Widowed 44 (29.5%)No formal education 67 (45.0%) Primary education 72 (48.3%) Secondary education 7 (4.7%) Tertiary education 2 (1.3%) Missing 1 (0.7%)100% Femalemean age 48 +/- 13 years                                                                                          | <40 km 41 (27.5%) 40-80 km 35 (23.5%) 81-100 km 13 (8.7%) 101-375 km 58 (38.9%)                                                                                             | -the odds of advanced stage cancer among patients who self-reported financial difficulty are 5.7 times (95% CI 1.58to 20.64) the odds of advanced cancer among the patients who did not report financial difficulty as a reason for non-prompt health seeking-the OR of advanced stage cervical cancer among patients who perceived their symptoms as due to a serious AEIllness or cancer was 0.43 times (95% CI 0.20 to 0.96) the OR of those who perceived their symptoms as not due to a serious illness/cancer<br>-In bivariate analyses, participants with secondary and tertiary education were less likely to be diagnosed with advanced stage cancer compared to those who had not attained formal education (crude OR=0.16 (95% CI 0.03to 0.87).<br>- patients who reported lack of money as reason for non-prompt health seeking were more likely to be diagnosed at advanced stage cervical cancer<br>- patients who perceived their symptoms as serious or due to cancer were less likely to be diagnosed at advanced stage cancer.<br>-pre-referral diagnoses by primary healthcare professional non-cancer related or not told: 61-lack of money: 108-symptoms not attributed to cancer: 130<br>-using other treatments: 60<br>-perceived illness as not serious or cancer: 58                                                                                       |                                                                                                                                                                                                                                                                                                           |    |    |    |    |    |    |    |    |    |    |    |    |    |    |    |    |    |    |    |    |    |    |    |    |    |    |    |    |    |    |    |    |    |    |    |    |    |    |    |    |    |    |    |    |    |    |    |    |    |    |

1  
2  
3  
4  
5  
6  
7  
8  
9  
10  
11  
12  
13  
14  
15  
16  
17  
18  
19  
20  
21  
22  
23  
24  
25  
26  
27  
28  
29  
30  
31  
32  
33  
34  
35  
36  
37  
38  
39  
40  
41  
42  
43  
44  
45  
46  
47  
48  
49  
50  
51  
52  
53  
54  
55  
56  
57  
58  
59  
60

|                                                                                                                                                                             |                                                                                              |                                                    |                                 |                         |                                                                       |                                                                                                                                                                                                                                                                                                                                                                                                                                             |                                                                                                                                                                                                                                             |                                                                                                                                                                                                                                                                                                                                                                                                                                                                                                                                                                                                                                                                                                                                                                                          |
|-----------------------------------------------------------------------------------------------------------------------------------------------------------------------------|----------------------------------------------------------------------------------------------|----------------------------------------------------|---------------------------------|-------------------------|-----------------------------------------------------------------------|---------------------------------------------------------------------------------------------------------------------------------------------------------------------------------------------------------------------------------------------------------------------------------------------------------------------------------------------------------------------------------------------------------------------------------------------|---------------------------------------------------------------------------------------------------------------------------------------------------------------------------------------------------------------------------------------------|------------------------------------------------------------------------------------------------------------------------------------------------------------------------------------------------------------------------------------------------------------------------------------------------------------------------------------------------------------------------------------------------------------------------------------------------------------------------------------------------------------------------------------------------------------------------------------------------------------------------------------------------------------------------------------------------------------------------------------------------------------------------------------------|
| Challenges faced by cancer patients in Uganda: Implications for health systems strengthening in resource limited settings Annet Nakaganda 2020                              | Cervix 72 (20%) Kaposi's sarcoma 71 (20%) Breast 46 (13%) Prostate 19 (5%) Esophagus 16 (4%) | Hospital Uganda                                    | April to May 2017               | Patients                | 359 Questionnaire                                                     | Self Employed 87 (24%)<br>Unemployed 82 (23%)<br>Stopped working due to cancer 70 (20%)<br>Casual employment 61 (17%)<br>Formal employment 39 (11%)<br>Other 20 (6%) -<br>Married 143 (43%)<br>Single 77 (21%)<br>Living together 61 (17%)<br>Separated/divorced 47 (13%)<br>Widow/Widower 31 (9%)<br>Primary level 147 (41%)<br>Secondary level 97 (27%)<br>College/University education level 71 (20%)<br>female 199 (55%) average age 43 | > 15 km 181<br><= 15 km 86                                                                                                                                                                                                                  | -lack of money for treatment, medicines and transportation.<br>-family responsibilities<br>-not healthy enough to continue treatment<br>-failure to find accommodation in Kampala.-lack of money for transportation.<br>-family responsibilities<br><br>-lack of money for transportation.<br>-family responsibilities                                                                                                                                                                                                                                                                                                                                                                                                                                                                   |
| Surgical candidacy and treatment initiation among women with cervical cancer at public referral hospitals in Kampala, Uganda: A descriptive cohort study Megan Swanson 2020 | cervical                                                                                     | Hospital Uganda                                    | April 2017 - September 2018     | Patients                | 268 Questionnaire                                                     | Industry/business 92 farming/domestic 175 not stated<br>Married 121 Single/divorced/widowed 146<br>Less than primary 110 Higher than primary 151<br>100% Female >=50 years 123 50 years 133                                                                                                                                                                                                                                                 |                                                                                                                                                                                                                                             | The statistics were executed to reflect chance of receiving treatment rather than delay - see comment box not stated not stated-financial constraints, including lack of funds to pay for travel and the nominal fees associated with radiation, surgery and diagnostic tests (69%)<br>- long wait times (30%) not stated not stated                                                                                                                                                                                                                                                                                                                                                                                                                                                     |
| Prognosis and delay of diagnosis among Kaposi's sarcoma patients in Uganda: A cross-sectional study Christopher De Boer 2014                                                | Kaposi sarcoma                                                                               | Hospital Uganda                                    | June to October 2012            | Patients                | 161 Other: case notes and standardized interviews                     | <100,000 UGSH =90 (58.1%)<br>100K - 500K UGSH=59 (38.1%)<br>>500,000 UGSH =6 (3.9%)<br>Primary 83 (51.6%)<br>Secondary 58 (36.0%)<br>Tertiary or degree 20 (12.4%)<br>Male 111 (68.9%)<br>Female 50= (31.1%)<br><30 =44 (28.0%)<br>31-40 =85 (54.1%)<br>>40 =28 (17.8%)                                                                                                                                                                     |                                                                                                                                                                                                                                             | -paid out of pocket tests or chemotherapy, 68 (42.2% p value 0.001) - visitation to a traditional healer was associated with experiencing diagnostic delay (OR2.69, p = 0.020, 95% CI: 1.17-6.17). -visited a traditional healer 41(25.5% p value 0.872)<br>-Lack of money for transportation<br>-Distance to UCI<br>-Lack of money for transportation<br>-Distance to UCI                                                                                                                                                                                                                                                                                                                                                                                                               |
| Inequities in breast cancer treatment in sub-Saharan Africa: Findings from a prospective multi-country observational study Milena Foerster 2019                             | Breast                                                                                       | Hospital Uganda<br>Nigeria<br>Namibia              | September 2014 'early 2016      | Patients                | 1335 Other: Prospective multi-centric                                 | Unskilled jobs 923 (70%)<br>- not treated 172 (18.8%) treated 751 (81.2%)<br>Skilled 503 (30%)<br>- not treated 55 (13.8%) treated 348 (86.2%)<br>Not stated Not stated Not stated 100%<br>female mean age 50.7 (SD = 13.6)                                                                                                                                                                                                                 | Not stated                                                                                                                                                                                                                                  | -BMI p=0.023<br>< 18.5 1.58 (0.70 to 3.59) AND 1.83 (0.79 to 4.21)<br>30+ 1.76 (1.10 to 2.81) AND 1.53 (0.95 to 2.47)<br>-Belief in spiritual healing p=0.004<br>Yes 1.18 (0.83 to 1.68) 1.21 (0.84 to 1.21) not stated not stated- cost<br>-personal decision e.g (lack of belief in effectiveness, fear or non compliance to or rejection of therapy) not stated not stated                                                                                                                                                                                                                                                                                                                                                                                                            |
| Dissecting the journey to breast cancer diagnosis in sub-Saharan Africa: Findings from the multicountry ABC-DO cohort study Milena Foerster 2020                            | Breast                                                                                       | Hospital Uganda,<br>Zambia,<br>Namibia,<br>Nigeria | September 2014 - September 2017 | Patients                | 1429 Other: Interviews                                                | Unskilled 1007 (70.5%)<br>Skilled 242 (29.5%)<br>Low SEP 810 (56.7%)<br>medium/high SEP 439 (43.3%)<br>Not married 710 (49.7%)<br>Married 539 (50.3%)<br>Primary/no education 628 (44.0%)<br>Secondary/higher 801 (56%)<br>100% female mean 50.1                                                                                                                                                                                            | Not stated                                                                                                                                                                                                                                  | -Age IRR 1.26 (0.89-1.79)<br>-Low SEP IRR 1.10 (0.93-1.30)<br>-Not married (only for Namibia, p<0.001) IRR 2.63 (1.22-5.64) and 1.28 (0.90-1.80) non blacks and blacks<br>-Primary/no education IRR 1.16 (0.98-1.37), (not for Namibia non black p=0.037)<br>-Unskilled labour IRR 1.22 (1.01-1.47)<br>-Belief in traditional medicine IRR 1.03 (0.87-1.22), (only for Nigeria and Zambia, p=0.007)<br>-Recent birth IRR 1.08 (0.84-1.38)<br>-HIV positive (only for Namibia-blacks and Zambia, p=0.022) IRR 1.11 (0.70-1.76) and 2.12 (0.97-4.62) respectively<br>-First symptom lump IRR 1.42 (1.14-1.76)-told not to worry<br>-wrong diagnosis-lack of transport transport costs-pain fear                                                                                            |
| Health system constraints affecting treatment and care among women with cervical cancer in Harare, Zimbabwe O. Tapera 2019                                                  | cervical                                                                                     | Regional Zimbabwe                                  | January to April 2018           | Patients and clinicians | 212: -patients 134 - health workers 78 Other: questionnaire, IDI, FGD | female patients 134 male hcw 15 female hcw 63 patients mean age 50.2 untreated cervical cancer and 52.9 for those with treated cancer health workers mean age 37.3 yrs                                                                                                                                                                                                                                                                      | Distance from nearest cervical cancer screening health facility <10 km untreated 5 (12%) treated 30 (33%) 11-50km untreated 4 (10%) treated 18 (19%) > 50km untreated 1 (2%) treated =7 (8%) Don't know untreated 32 (76%) treated 37 (40%) | Women:<br>-inability to see specialist<br>- less access to regular general practitioners<br>-paying out of pocket for health services<br>Health care workers<br>-inadequate training of HCW for cervical cancer treatment and care.<br>-not knowing or having read both the National Cancer Prevention and Control Strategy (2013-2017) and the Cervical Cancer Prevention and Control Strategy for Zimbabwe (2016-2020)<br>-not enough health professionals to meet the demand of services in health facilities<br>-weak surveillance system for cervical cancer<br>-unavailability of back-up for major equipment- didn't know estimated distances from their residence to the nearest cervical cancer screening<br>-lack of finances. - Financial challenges<br>-transport challenges |

1  
2  
3  
4  
5  
6  
7  
8  
9  
10  
11  
12  
13  
14  
15  
16  
17  
18  
19  
20  
21  
22  
23  
24  
25  
26  
27  
28  
29  
30  
31  
32  
33  
34  
35  
36  
37  
38  
39  
40  
41  
42  
43  
44  
45  
46  
47  
48  
49  
50  
51  
52  
53  
54  
55  
56  
57  
58  
59  
60

| Author           | Exposure                                                                           | Outcome                                                        |
|------------------|------------------------------------------------------------------------------------|----------------------------------------------------------------|
| Cacala 2017      | Breast Cancer pathway to diagnosis (symptom appraisal to presentation to clinic)   | Late presentation of Breast Cancer (T-stage)                   |
| De Boer 2014     | Kaposi's Sarcoma pathway to diagnosis                                              | Delay in diagnosis of Kaposi's Sarcoma (Poor outcomes)         |
| Dickens 2014     | Distance from diagnostic hospital to treatment center                              | Stage of breast cancer at diagnosis                            |
| Foerster 2019    | Breast Cancer Pathway to treatment                                                 | Receipt of treatment                                           |
| Gebremariam 2021 | Breast Cancer Care pathway to chemotherapy                                         | Time to initiation of chemotherapy                             |
| Ibrahim 2011     | Cervical cancer pathway to diagnosis (symptom appraisal to presentation to clinic) | Advanced stage disease                                         |
| Jedy-Agba 2017   | Breast Cancer Pathway to diagnosis                                                 | Stage at diagnosis                                             |
| Knapp 2020       | Geospatial access                                                                  | Cancer stage at diagnosis                                      |
| Martei 2019      | Chemotherapy stock out                                                             | Suboptimal therapy delivery                                    |
| Page 2019        | Positive HPV test                                                                  | Acceptance and adherence to diagnostic procedure and treatment |
| Schleimer 2019   | Pathway from diagnosis to surgery                                                  | Delay to appropriate operative treatment                       |
| Tesfaw 2020      | Breast Cancer diagnostic pathway; patient delay > 3 months                         | Advanced stage of cancer at diagnosis                          |
| Zelege 2021      | Cervical Cancer Diagnostic pathway                                                 | Stage IIIA-IVB presentation                                    |





# PRISMA 2020 Checklist

1  
2  
3  
4  
5  
6  
7  
8  
9  
10  
11  
12  
13  
14  
15  
16  
17  
18  
19  
20  
21  
22  
23  
24  
25  
26  
27  
28  
29  
30  
31  
32  
33  
34  
35  
36  
37  
38  
39  
40  
41  
42  
43  
44  
45  
46  
47

| Section and Topic             | Item # | Checklist item                                                                                                                                                                                                                                                                                       | Location where item is reported |
|-------------------------------|--------|------------------------------------------------------------------------------------------------------------------------------------------------------------------------------------------------------------------------------------------------------------------------------------------------------|---------------------------------|
| <b>TITLE</b>                  |        |                                                                                                                                                                                                                                                                                                      |                                 |
| Title                         | 1      | Identify the report as a systematic review.                                                                                                                                                                                                                                                          | 1                               |
| <b>ABSTRACT</b>               |        |                                                                                                                                                                                                                                                                                                      |                                 |
| Abstract                      | 2      | See the PRISMA 2020 for Abstracts checklist.                                                                                                                                                                                                                                                         | 2                               |
| <b>INTRODUCTION</b>           |        |                                                                                                                                                                                                                                                                                                      |                                 |
| Rationale                     | 3      | Describe the rationale for the review in the context of existing knowledge.                                                                                                                                                                                                                          | 4                               |
| Objectives                    | 4      | Provide an explicit statement of the objective(s) or question(s) the review addresses.                                                                                                                                                                                                               | 5,6                             |
| <b>METHODS</b>                |        |                                                                                                                                                                                                                                                                                                      |                                 |
| Eligibility criteria          | 5      | Specify the inclusion and exclusion criteria for the review and how studies were grouped for the syntheses.                                                                                                                                                                                          | 6                               |
| Information sources           | 6      | Specify all databases, registers, websites, organisations, reference lists and other sources searched or consulted to identify studies. Specify the date when each source was last searched or consulted.                                                                                            | 6                               |
| Search strategy               | 7      | Present the full search strategies for all databases, registers and websites, including any filters and limits used.                                                                                                                                                                                 | Appendix 1                      |
| Selection process             | 8      | Specify the methods used to decide whether a study met the inclusion criteria of the review, including how many reviewers screened each record and each report retrieved, whether they worked independently, and if applicable, details of automation tools used in the process.                     | 6                               |
| Data collection process       | 9      | Specify the methods used to collect data from reports, including how many reviewers collected data from each report, whether they worked independently, any processes for obtaining or confirming data from study investigators, and if applicable, details of automation tools used in the process. | 6                               |
| Data items                    | 10a    | List and define all outcomes for which data were sought. Specify whether all results that were compatible with each outcome domain in each study were sought (e.g. for all measures, time points, analyses), and if not, the methods used to decide which results to collect.                        | Appendix 2                      |
|                               | 10b    | List and define all other variables for which data were sought (e.g. participant and intervention characteristics, funding sources). Describe any assumptions made about any missing or unclear information.                                                                                         | Appendix 2                      |
| Study risk of bias assessment | 11     | Specify the methods used to assess risk of bias in the included studies, including details of the tool(s) used, how many reviewers assessed each study and whether they worked independently, and if applicable, details of automation tools used in the process.                                    | 6,7,8 Figure 3                  |
| Effect measures               | 12     | Specify for each outcome the effect measure(s) (e.g. risk ratio, mean difference) used in the synthesis or presentation of results.                                                                                                                                                                  | Appendix 2                      |
| Synthesis methods             | 13a    | Describe the processes used to decide which studies were eligible for each synthesis (e.g. tabulating the study intervention characteristics and comparing against the planned groups for each synthesis (item #5)).                                                                                 | n/a                             |
|                               | 13b    | Describe any methods required to prepare the data for presentation or synthesis, such as handling of missing summary statistics, or data conversions.                                                                                                                                                | n/a                             |
|                               | 13c    | Describe any methods used to tabulate or visually display results of individual studies and syntheses.                                                                                                                                                                                               | n/a                             |
|                               | 13d    | Describe any methods used to synthesize results and provide a rationale for the choice(s). If meta-analysis was performed, describe the model(s), method(s) to identify the presence and extent of statistical heterogeneity, and software package(s) used.                                          | n/a                             |
|                               | 13e    | Describe any methods used to explore possible causes of heterogeneity among study results (e.g. subgroup analysis, meta-regression).                                                                                                                                                                 | n/a                             |
|                               | 13f    | Describe any sensitivity analyses conducted to assess robustness of the synthesized results.                                                                                                                                                                                                         | n/a                             |
| Reporting bias assessment     | 14     | Describe any methods used to assess risk of bias due to missing results in a synthesis (arising from reporting biases).                                                                                                                                                                              | 6,7,8 Figure 3                  |
| Certainty assessment          | 15     | Describe any methods used to assess certainty (or confidence) in the body of evidence for an outcome.                                                                                                                                                                                                | n/a                             |



## PRISMA 2020 Checklist

1  
2  
3  
4  
5  
6  
7  
8  
9  
10  
11  
12  
13  
14  
15  
16  
17  
18  
19  
20  
21  
22  
23  
24  
25  
26  
27  
28  
29  
30  
31  
32  
33  
34  
35  
36  
37  
38  
39  
40  
41  
42  
43  
44  
45  
46  
47

| Section and Topic                              | Item # | Checklist item                                                                                                                                                                                                                                                                       | Location where item is reported |
|------------------------------------------------|--------|--------------------------------------------------------------------------------------------------------------------------------------------------------------------------------------------------------------------------------------------------------------------------------------|---------------------------------|
| <b>RESULTS</b>                                 |        |                                                                                                                                                                                                                                                                                      |                                 |
| Study selection                                | 16a    | Describe the results of the search and selection process, from the number of records identified in the search to the number of studies included in the review, ideally using a flow diagram.                                                                                         | 7                               |
|                                                | 16b    | Cite studies that might appear to meet the inclusion criteria, but which were excluded, and explain why they were excluded.                                                                                                                                                          | Figure 2                        |
| Study characteristics                          | 17     | Cite each included study and present its characteristics.                                                                                                                                                                                                                            | 7, Appendix 2                   |
| Risk of bias in studies                        | 18     | Present assessments of risk of bias for each included study.                                                                                                                                                                                                                         | Figure 3                        |
| Results of individual studies                  | 19     | For all outcomes, present, for each study: (a) summary statistics for each group (where appropriate) and (b) an effect estimate and its precision (e.g. confidence/credible interval), ideally using structured tables or plots.                                                     | Appendix 2                      |
| Results of syntheses                           | 20a    | For each synthesis, briefly summarise the characteristics and risk of bias among contributing studies.                                                                                                                                                                               | n/a                             |
|                                                | 20b    | Present results of all statistical syntheses conducted. If meta-analysis was done, present for each the summary estimate and its precision (e.g. confidence/credible interval) and measures of statistical heterogeneity. If comparing groups, describe the direction of the effect. | n/a                             |
|                                                | 20c    | Present results of all investigations of possible causes of heterogeneity among study results.                                                                                                                                                                                       | n/a                             |
|                                                | 20d    | Present results of all sensitivity analyses conducted to assess the robustness of the synthesized results.                                                                                                                                                                           | n/a                             |
| Reporting biases                               | 21     | Present assessments of risk of bias due to missing results (arising from reporting biases) for each synthesis assessed.                                                                                                                                                              | Figure 3                        |
| Certainty of evidence                          | 22     | Present assessments of certainty (or confidence) in the body of evidence for each outcome assessed.                                                                                                                                                                                  | n/a                             |
| <b>DISCUSSION</b>                              |        |                                                                                                                                                                                                                                                                                      |                                 |
| Discussion                                     | 23a    | Provide a general interpretation of the results in the context of other evidence.                                                                                                                                                                                                    | 16,17,18                        |
|                                                | 23b    | Discuss any limitations of the evidence included in the review.                                                                                                                                                                                                                      | 18                              |
|                                                | 23c    | Discuss any limitations of the review processes used.                                                                                                                                                                                                                                | n/a                             |
|                                                | 23d    | Discuss implications of the results for practice, policy, and future research.                                                                                                                                                                                                       | 18                              |
| <b>OTHER INFORMATION</b>                       |        |                                                                                                                                                                                                                                                                                      |                                 |
| Registration and protocol                      | 24a    | Provide registration information for the review, including register name and registration number, or state that the review was not registered.                                                                                                                                       | n/a                             |
|                                                | 24b    | Indicate where the review protocol can be accessed, or state that a protocol was not prepared.                                                                                                                                                                                       | Notprepared                     |
|                                                | 24c    | Describe and explain any amendments to information provided at registration or in the protocol.                                                                                                                                                                                      | n/a                             |
| Support                                        | 25     | Describe sources of financial or non-financial support for the review, and the role of the funders or sponsors in the review.                                                                                                                                                        | 19                              |
| Competing interests                            | 26     | Declare any competing interests of review authors.                                                                                                                                                                                                                                   | 19                              |
| Availability of data, code and other materials | 27     | Report which of the following are publicly available and where they can be found: template data collection forms; data extracted from included studies; data used for all analyses; analytic code; any other materials used in the review.                                           | 19                              |

From: Page MJ, McKenzie JE, Bossuyt PM, Boutron I, Hoffmann TC, Mulrow CD, et al. The PRISMA 2020 statement: an updated guideline for reporting systematic reviews. *BMJ* 2021;372:n71. doi: 10.1136/bmj.n71

For peer review only - <http://bmjopen.bmj.com/site/about/guidelines.xhtml>

For more information, visit: <http://www.prisma-statement.org/>
