# Supplementary material for: Delays in seeking, reaching and access to quality cancer care in sub-Saharan Africa: a systematic review
Source: PubMed Central journal article supplement — BMJ Open. 2023 Apr 13;13(4):e067715. doi: 10.1136/bmjopen-2022-067715 (PMC10106057; doi:10.1136/bmjopen-2022-067715), 2023-04-13
Supplement: bmjopen-2022-067715supp001.pdf [file bmjopen-2022-067715supp001.pdf]

| <b>Systematic review</b>                |                                                                                                                                                                                                                                                                                                                                                                                                                                                                                                                                                                                                                                                                                                                                                                                                                                                                                                                                                                                                 |
|-----------------------------------------|-------------------------------------------------------------------------------------------------------------------------------------------------------------------------------------------------------------------------------------------------------------------------------------------------------------------------------------------------------------------------------------------------------------------------------------------------------------------------------------------------------------------------------------------------------------------------------------------------------------------------------------------------------------------------------------------------------------------------------------------------------------------------------------------------------------------------------------------------------------------------------------------------------------------------------------------------------------------------------------------------|
| <b>Databases</b>                        |                                                                                                                                                                                                                                                                                                                                                                                                                                                                                                                                                                                                                                                                                                                                                                                                                                                                                                                                                                                                 |
|                                         | PubMed                                                                                                                                                                                                                                                                                                                                                                                                                                                                                                                                                                                                                                                                                                                                                                                                                                                                                                                                                                                          |
| <b>Search terms</b>                     |                                                                                                                                                                                                                                                                                                                                                                                                                                                                                                                                                                                                                                                                                                                                                                                                                                                                                                                                                                                                 |
| Search terms                            | Synonyms                                                                                                                                                                                                                                                                                                                                                                                                                                                                                                                                                                                                                                                                                                                                                                                                                                                                                                                                                                                        |
| 1. Cancer<br>ti,ab                      | cancer OR tumour OR tumor OR neopla* OR malignan* OR carcinoma                                                                                                                                                                                                                                                                                                                                                                                                                                                                                                                                                                                                                                                                                                                                                                                                                                                                                                                                  |
| 2. Delay<br>ti, ab                      | barrier* OR delay* OR access OR late OR interval                                                                                                                                                                                                                                                                                                                                                                                                                                                                                                                                                                                                                                                                                                                                                                                                                                                                                                                                                |
| 3. Diagnosis and<br>treatment<br>ti, ab | diagnos* OR presentation OR intervention OR referral OR consult* OR treatment OR therap*                                                                                                                                                                                                                                                                                                                                                                                                                                                                                                                                                                                                                                                                                                                                                                                                                                                                                                        |
| 4. countries<br>ti,ab                   | angola OR benin OR botswana OR burkina faso OR burundi OR cameroon OR cameron OR cape verde OR cabo verde OR central african republic OR ubangi shari OR chad OR comoros OR comoro islands OR iles comores OR congo brazzaville OR congo democratic republic OR democratic republic of congo OR congo OR zaire OR cote d ivoire OR cote divoire OR ivory coast OR djibouti OR french somaliland OR equatorial guinea OR eritrea OR ethiopia OR gabon OR Gabonese republic OR gambia OR ghana OR gold coast OR guinea OR guinea bissau OR kenya OR lesotho OR basutoland OR liberia OR madagascar OR malagasy OR malawi OR nyasaland OR mali OR mauritania OR mauritius OR mozambique OR namibia OR niger OR nigeria OR réunion OR rwanda OR Ruanda OR sao tome OR principe OR senegal OR seychelles OR sierra leone OR somalia OR south africa OR south sudan OR sudan OR swaziland OR tanzania OR tanganyika OR togo OR togolese republic OR uganda OR zambia OR zimbabwe OR africa OR african |
| 5. Qualitative search<br>terms          | qualitative* OR narrative* OR interview* OR focus group* OR grounded theory*                                                                                                                                                                                                                                                                                                                                                                                                                                                                                                                                                                                                                                                                                                                                                                                                                                                                                                                    |

| Systematic review                       |                                                                                                                                                                                                                                                                                                                                                                                                                                                                                                                                                                                                                                                                                                                                                                                                                                                                                                                                                                                                                                                                                                                                                                                                                                                                                                                                                                                                                                                                                                                                                                      |
|-----------------------------------------|----------------------------------------------------------------------------------------------------------------------------------------------------------------------------------------------------------------------------------------------------------------------------------------------------------------------------------------------------------------------------------------------------------------------------------------------------------------------------------------------------------------------------------------------------------------------------------------------------------------------------------------------------------------------------------------------------------------------------------------------------------------------------------------------------------------------------------------------------------------------------------------------------------------------------------------------------------------------------------------------------------------------------------------------------------------------------------------------------------------------------------------------------------------------------------------------------------------------------------------------------------------------------------------------------------------------------------------------------------------------------------------------------------------------------------------------------------------------------------------------------------------------------------------------------------------------|
| Databases                               |                                                                                                                                                                                                                                                                                                                                                                                                                                                                                                                                                                                                                                                                                                                                                                                                                                                                                                                                                                                                                                                                                                                                                                                                                                                                                                                                                                                                                                                                                                                                                                      |
|                                         | EMBASE                                                                                                                                                                                                                                                                                                                                                                                                                                                                                                                                                                                                                                                                                                                                                                                                                                                                                                                                                                                                                                                                                                                                                                                                                                                                                                                                                                                                                                                                                                                                                               |
| Search terms                            |                                                                                                                                                                                                                                                                                                                                                                                                                                                                                                                                                                                                                                                                                                                                                                                                                                                                                                                                                                                                                                                                                                                                                                                                                                                                                                                                                                                                                                                                                                                                                                      |
| Search terms                            | Synonyms                                                                                                                                                                                                                                                                                                                                                                                                                                                                                                                                                                                                                                                                                                                                                                                                                                                                                                                                                                                                                                                                                                                                                                                                                                                                                                                                                                                                                                                                                                                                                             |
| 1. Cancer<br>ti,ab                      | cancer:ti,ab OR tumour:ti,ab OR tumor:ti,ab OR neopla*:ti,ab<br>OR malignan*:ti,ab OR carcinoma:ti,ab                                                                                                                                                                                                                                                                                                                                                                                                                                                                                                                                                                                                                                                                                                                                                                                                                                                                                                                                                                                                                                                                                                                                                                                                                                                                                                                                                                                                                                                                |
| 2. Delay                                | barrier*:ti,ab OR delay*:ti,ab OR access:ti,ab OR late:ti,ab OR<br>interval:ti,ab                                                                                                                                                                                                                                                                                                                                                                                                                                                                                                                                                                                                                                                                                                                                                                                                                                                                                                                                                                                                                                                                                                                                                                                                                                                                                                                                                                                                                                                                                    |
| 3. Diagnosis and<br>treatment<br>ti, ab | diagnos*:ti,ab OR presentation:ti,ab OR intervention:ti,ab<br>OR referral:ti,ab OR consult*:ti,ab OR treatment:ti,ab OR<br>therap*:ti,ab                                                                                                                                                                                                                                                                                                                                                                                                                                                                                                                                                                                                                                                                                                                                                                                                                                                                                                                                                                                                                                                                                                                                                                                                                                                                                                                                                                                                                             |
| 4. Sub-Saharan Africa<br>ti, ab         | angola:ti,ab OR benin:ti,ab OR botswana:ti,ab OR 'burkina<br>faso':ti,ab OR burundi:ti,ab OR cameroon:ti,ab OR<br>cameron:ti,ab OR 'cape verde':ti,ab OR 'cabo verde':ti,ab OR<br>'central african republic':ti,ab OR 'ubangi shari':ti,ab OR<br>chad:ti,ab OR comoros:ti,ab OR 'comoro islands':ti,ab OR<br>'iles comores':ti,ab OR 'congo brazzaville':ti,ab OR 'congo<br>democratic republic':ti,ab OR 'democratic republic<br>congo':ti,ab OR congo:ti,ab OR zaire:ti,ab OR 'cote<br>divoire':ti,ab OR 'cote d ivoire':ti,ab OR 'ivory coast':ti,ab OR<br>djibouti:ti,ab OR 'french somaliland':ti,ab OR 'equatorial<br>guinea':ti,ab OR eritrea:ti,ab OR ethiopia:ti,ab OR gabon:ti,ab<br>OR 'gabonese republic':ti,ab OR gambia:ti,ab OR ghana:ti,ab<br>OR 'gold coast':ti,ab OR guinea:ti,ab OR 'guinea bissau':ti,ab<br>OR kenya:ti,ab OR lesotho:ti,ab OR basutoland:ti,ab OR<br>liberia:ti,ab OR madagascar:ti,ab OR malagasy:ti,ab OR<br>malawi:ti,ab OR nyasaland:ti,ab OR mali:ti,ab OR<br>mauritania:ti,ab OR mauritius:ti,ab OR mozambique:ti,ab OR<br>namibia:ti,ab OR niger:ti,ab OR nigeria:ti,ab OR réunion:ti,ab<br>OR rwanda:ti,ab OR ruanda:ti,ab OR 'sao tome':ti,ab OR<br>'principe':ti,ab OR senegal:ti,ab OR seychelles:ti,ab OR<br>'sierra leone':ti,ab OR somalia:ti,ab OR 'south africa':ti,ab OR<br>'south sudan':ti,ab OR sudan:ti,ab OR swaziland:ti,ab OR<br>tanzania:ti,ab OR tanganyika:ti,ab OR togo:ti,ab OR 'togolese<br>republic':ti,ab OR uganda:ti,ab OR zambia:ti,ab OR<br>zimbabwe:ti,ab OR africa:ti,ab OR african:ti,ab |
| 5. Qualitative search<br>terms          | qualitative*:ti,ab OR narrative*:ti,ab OR interview*:ti,ab OR<br>focus group*:ti,ab OR grounded theory*:ti,ab                                                                                                                                                                                                                                                                                                                                                                                                                                                                                                                                                                                                                                                                                                                                                                                                                                                                                                                                                                                                                                                                                                                                                                                                                                                                                                                                                                                                                                                        |
