# Supplementary material for: Delays in seeking, reaching and access to quality cancer care in sub-Saharan Africa: a systematic review
Source: PubMed Central journal article supplement — BMJ Open. 2023 Apr 13;13(4):e067715. doi: 10.1136/bmjopen-2022-067715 (PMC10106057; doi:10.1136/bmjopen-2022-067715), 2023-04-13
Supplement: bmjopen-2022-067715supp002.pdf [file bmjopen-2022-067715supp002.pdf]

Appendix 2. Data extraction

| Title/Author, Year of publication                                                                                                                           | Cancer type                                                                                                                                                                                                                         | Setting Country   | Data collection timeframe              | Participants | Sample size and design                    | Patient factors                                                                                                                                                                                                                                                                                                                                             | Distance from hospital                                                                                                                                                                                                                                                                | Reasons for delay and outcomes                                                                                                                                                                                                                                                                                                                                                                                                                                                                                                                                                                                                                                                                                                                                                                                                                                                                                                                                                                                                                                                                                                                                                                                                                                                                                                                                                                                                                                                                                                                                                                                                                                                                                                                                                                                                                                                              |
|-------------------------------------------------------------------------------------------------------------------------------------------------------------|-------------------------------------------------------------------------------------------------------------------------------------------------------------------------------------------------------------------------------------|-------------------|----------------------------------------|--------------|-------------------------------------------|-------------------------------------------------------------------------------------------------------------------------------------------------------------------------------------------------------------------------------------------------------------------------------------------------------------------------------------------------------------|---------------------------------------------------------------------------------------------------------------------------------------------------------------------------------------------------------------------------------------------------------------------------------------|---------------------------------------------------------------------------------------------------------------------------------------------------------------------------------------------------------------------------------------------------------------------------------------------------------------------------------------------------------------------------------------------------------------------------------------------------------------------------------------------------------------------------------------------------------------------------------------------------------------------------------------------------------------------------------------------------------------------------------------------------------------------------------------------------------------------------------------------------------------------------------------------------------------------------------------------------------------------------------------------------------------------------------------------------------------------------------------------------------------------------------------------------------------------------------------------------------------------------------------------------------------------------------------------------------------------------------------------------------------------------------------------------------------------------------------------------------------------------------------------------------------------------------------------------------------------------------------------------------------------------------------------------------------------------------------------------------------------------------------------------------------------------------------------------------------------------------------------------------------------------------------------|
| Impact of Essential Medicine Stock Outs on Cancer Therapy Delivery in a Resource-Limited Setting. Yehoda M. Martei, 2019                                    | cervical breast prostate esophageal lung uterine ovarian colorectal head and neck cancers Kaposi sarcoma                                                                                                                            | Hospital Botswana | 1st January 2016 to 31st December 2016 | Patients     | 286 Retrospective cohort                  | Male 77<br>Female 180<br>Unknown 29<65yrs =217<br>> 65yrs=61<br>Unknown=8                                                                                                                                                                                                                                                                                   |                                                                                                                                                                                                                                                                                       | -each week of stock out was strongly associated with a suboptimal therapy delivery event AL1(OR, 1.81; 95% CI, 1.62 to 2.02).<br>-Every week of stock-out duration was associated with an almost two-fold increased risk of a suboptimal therapy delivery event (OR, 1.9; 95%CI, 1.7 to 2.13; P,.001).<br>- patients receiving treatment regimens for colon (OR, 6.34;95% CI, 3.11 to 12.9;P,.001) or rectal cancer (OR, 7.07;95% CI, 1.83 to 27.3;P=.004) were at the highest risk of an event after adjusting for stock out, whereas those with prostate cancer were less likely than their counterparts to experience a suboptimal therapy delivery event (adjusted OR, 0.24; 95% CI, 0.08 to 0.79;P=.019<br>-The measured exposure was chemotherapy stock out, quantified as the duration of chemotherapy stock out within a cycle interval.<br>-Stock-out duration was calculated by counting the days from the date the drug was out of stock to the date it was recorded as being back in stock.<br>-The primary outcome, suboptimal therapy delivery, was defined as any of the following events: any dose reduction, at least 1-week delay in receipt of therapy, any missed dose, and any switch in intended therapy.<br>- A majority of the patients with stage information had either stage III or IV disease. Of patients with known intent of treatment, 51%were receiving curative regimens and 49% were receiving noncurative regimens-chemotherapy stock outs                                                                                                                                                                                                                                                                                                                                                                                                              |
| Patient Factors Associated With Delays in Obtaining Cancer Care in Botswana. Rhine K Bhatia 2018                                                            | All cancers Cervical 90 (42.3%) Breast 34 (16.0%) Head and neck 34 (16.0%) Vulvar 15 (7.04%) Kaposi's sarcoma 14 (6.7%) Endometrial 7 (3.3%) Penile 5 (2.4%) Anal 5 (2.4%) Oesophageal 5 (2.4%) Lymphoma 3 (1.4%) Prostate 1 (0.5%) | Hospital Botswana | December 2015 - January 2017           | Patients     | 214 Questionnaire                         | not stated not statedSingle 132 (62.9%) Married 47 (22.4%) serious or live-in 16 (7.7%) Separated/ widowed 15 (7.1%)None 28 (16.2%) Primary 59 (34.1%) Secondary 70 (40.5%) Tertiary or above 16 (9.3%)Women 173 (81.3%) Men 41 (19.2%)median age of 46 years (21-95 years)                                                                                 | 5-50 km 67 (32.7)<br>51-200 km 61 (29.8)<br>201-400 km 34 (16.6)<br>> 400 km 43 (30.0)                                                                                                                                                                                                | English literacy: Can read in English, p=0.042 OR 2.32; Cancer diagnosis site: Breast p=0.017 OR 3.73; Head and neck p=0.017 OR 93.73Predominantly female cancer p=0.015 OR 0.452; Relationship status: separated/widowed p=0.032 OR 0.3Appraisal delay; Female sex p=0.032 OR 0.45; Education level: primary schooling p=0.057 OR 0.367; Distance from PMH (201-400 km) p=0.056 OR 2.5; Cancer diagnosis site Kaposi sarcoma p<.001 OR 9.77; Penile cancer p=0.029 OR 8.14; Symptom severity A little serious p=0.001 OR 0.14; Very serious p=0.020 OR 0.402;Predominantly female cancer p=0.005 OR 0.4 ; Help-seeking delay No. of family members: 4-10 p=0.03 OR 0.314; Symptom severity: very serious p=0.012 OR 0.384; Cancer diagnosis site: Vulvar p=0.055 OR 2.97; Kaposi sarcoma p=0.011 OR 4.68Beliefs:<br>- declining treatment: getting cancer is part of God's plan p=0.0416 - 28/115 (2.74%)Appraisal - sex, p=0.030: male 16 (39%); female 39 (22.5%)<br>- severity of symptoms, p=0.006: not serious 22 (44.9%); a little serious 4 (10.3%); moderately serious 5 (21.7%); serious 5 (23.8%) very serious 19 (24.7%)<br>- cancer site, p=0.011:Cervical 14 (15.6%); Vulvar 5 (33.3%); Anal 1 (20%); Head and neck 9 (26.5%); Penile 3 (60%); Breast 8 (23.5%); Lymphoma 2 (66.7%) Oesophageal 2 (40%) Kaposi sarcoma 9 (64.3%) Endometrial 2 (28.6%) Prostate 0<br>- age, p=0.496<br>Fears<br>- Scared of telling people that I am sick, p=0.006 4/213 (0.212%)<br>- Scared of job loss, p=0.002 6/171 (90.22%)<br>- Scared of surgery p=0.0415 8/206 (0.378%)<br>- Scared of radiation therapy p=0.0253 8/211 (0.352%)<br>- Scared of chemotherapy p=0.0339 12/213 (0.420%)<br>- Scared of missing family commitments as a result of treatment p=0.0061 4/210 (0.212%)<br>- Scared of death p=0.0169 13/213 (0.392%)<br>Beliefs<br>- death is near p=0.0406 9/210 (0.393%) |
| Factors related to advanced stage of cancer presentation in Botswana Chidima Anakweke 2018                                                                  | Response rate 99.53% n=220. cervical 90 breast 32 , head and neck 42 , vulvar 15, kaposi sarcoma 14, endometrial 7,penile 6, anal 5, esophageal 5,lymphoma 3 prostate 1                                                             | Hospital Botswana | December 2015 to January 2017          | Patients     | 214 Questionnaire                         | Single early 41 (19.5%) late 40 (19.0%) unknown =51 (24.3%) Married/in a serious relationship early 9 (4.3%) late 24 (11.4%) unknown 22 (10.5%) Living with a partner early 3 (1.4%) late 4 (1.9%) stage 1 (0.5%) Divorced/separated/widowed early 3 (1.4%) late 6 (2.9%) stage 6 (2.9%)No formal education early 6 (3.4%) late 11 (6.3%) unknown 11 (6.3%) | 5-50 km early 15 (7.3%) late 29 (14.1%) unknown =23 (11.2%) 51-200km early 20 (9.7%) late 19 (9.2%) unknown 22 (10.7%) 201-400km early 12 (5.8%) late stage 7 (3.4%) unknown15 (7.3%) > 400 early 9 (4.4%) late 19 (9.2%) unknown 15 (7.3%) Unable to locate village unknown 1 (0.5%) | - not afraid of having cancer OR, 3.48; P < .05<br>- no family to care during treatment OR, 6.35; P = .05<br>-could not afford to develop cancer (OR, 2.73; P < .05)<br>- belief use of contraceptive pills or injections causes cancer OR (0.72 P=0.02)<br>- belief using hormone replacement pills after menopause can cause cancer OR (0.96 p=0.01)-Transportation problems; Dependent on others for transportation                                                                                                                                                                                                                                                                                                                                                                                                                                                                                                                                                                                                                                                                                                                                                                                                                                                                                                                                                                                                                                                                                                                                                                                                                                                                                                                                                                                                                                                                      |
| Factors associated with delays to surgical presentation in North-West Cameroon Chao Long 2015                                                               | -skin -breast -colorectal -gynecologic -anal                                                                                                                                                                                        | Hospital Cameroon | 23rd June,2014 - 5th August 2014       | Patients     | 220 Other: cross sectional                | -less than primary school completed 37(16.8%)<br>-completed primary school 115 (52.3%)<br>-secondary school or higher education completed 68 (30.9%)134 Males 86 females<br>-cancer cohort had 19 males and 40 females15 to 20 yrs 4 21 to 29 yrs 7 30 to39 yrs 7 40to 49 yrs 8 50 to 59 yrs 14 60 to 69 yrs 13 70 to 79 yrs 5 80+ yrs 1                    |                                                                                                                                                                                                                                                                                       | -thought another health care provider could provide adequate or better care<br>-Lack of knowledge about MBH hospital<br>-cost of hospital fees<br>-need for first aid/emergency care at the nearest facility<br>-in ability to participate in care decisions due to mental state<br>-transportation<br>-inability to take time from work/commitments -belief that they were not sick enough<br>-belief that they could treat themselves                                                                                                                                                                                                                                                                                                                                                                                                                                                                                                                                                                                                                                                                                                                                                                                                                                                                                                                                                                                                                                                                                                                                                                                                                                                                                                                                                                                                                                                     |
| Late-Stage Diagnosis and Associated Factors Among Breast Cancer Patients in South and Southwest Ethiopia: A Multicenter Study Aragaw Tesfaw 2020            | Breast                                                                                                                                                                                                                              | Regional Ethiopia | January 2013 - December 2017           | Patients     | 426 Retrospective cohort                  | not stated not statedMale 28 (6.6%) Female 398 (93.4%)mean 42.78 +/- 13.4                                                                                                                                                                                                                                                                                   | not stated                                                                                                                                                                                                                                                                            | - breast lump or mass as the chief complaint were 3 times more likely to be diagnosed with late-stage disease than those who did not (AOR= 3.01; 95% CI, 1.49-6.07)late-stage disease: rural communities 224 patients (73%), urban areas 85(28%)<br>-female patients (74.4%), male patients 46.4%<br>-long patient delay 240 patients (77.2%)<br>-long total delay vs short total delay (77.4% vs. 67.3%, respectively,P<0.05)not statednot statednot statednot stated                                                                                                                                                                                                                                                                                                                                                                                                                                                                                                                                                                                                                                                                                                                                                                                                                                                                                                                                                                                                                                                                                                                                                                                                                                                                                                                                                                                                                      |
| Factors associated with delayed diagnosis of cervical cancer in tikar ambesa specialized hospital, Ethiopia, 2019: Cross-sectional study Shegaw Zeleke 2021 | Cervical                                                                                                                                                                                                                            | Hospital Ethiopia | not stated                             | Patients     | 410 Other: case note review and interview | Farmer 182 (44.4 %) Governmental 27 (6.6%) Private 54 (13.2%) Unemployed 147 (35.9%) not statedMarried 285 (69.5%) Single 11 (2.7%) Divorced 36 (8.8%) Widowed 78 (19.0%)Cannot read and write 205 (50%)100% Femalemean age 50 years (+/- 11.5)                                                                                                             | <100 km 106 25.9% >100 km 304 74.1%                                                                                                                                                                                                                                                   | not statednot statednot statednot statednot stated- Accept as cancer cannot heal<br>- Go to traditional healers<br>- Difficulty of decision<br>- Can be healed by itself<br>- Given priority for other diseases<br>- Embarrassment<br>- Unawareness of cervical cancer health service access                                                                                                                                                                                                                                                                                                                                                                                                                                                                                                                                                                                                                                                                                                                                                                                                                                                                                                                                                                                                                                                                                                                                                                                                                                                                                                                                                                                                                                                                                                                                                                                                |

|                                                                                                                                                                                                            |          |                   |                                    |          |                                                                                                                                                                                                                                                                                                                                                                                                                                                                                                                                    |                                         |                                                                                                                                                                                                                                                                                                                                                                                                                                                                                                                                                                                                                                                                                                                                                                                                                                                                                                                                                                                                                                                                                                                                                                                                                                                                                                                                        |
|------------------------------------------------------------------------------------------------------------------------------------------------------------------------------------------------------------|----------|-------------------|------------------------------------|----------|------------------------------------------------------------------------------------------------------------------------------------------------------------------------------------------------------------------------------------------------------------------------------------------------------------------------------------------------------------------------------------------------------------------------------------------------------------------------------------------------------------------------------------|-----------------------------------------|----------------------------------------------------------------------------------------------------------------------------------------------------------------------------------------------------------------------------------------------------------------------------------------------------------------------------------------------------------------------------------------------------------------------------------------------------------------------------------------------------------------------------------------------------------------------------------------------------------------------------------------------------------------------------------------------------------------------------------------------------------------------------------------------------------------------------------------------------------------------------------------------------------------------------------------------------------------------------------------------------------------------------------------------------------------------------------------------------------------------------------------------------------------------------------------------------------------------------------------------------------------------------------------------------------------------------------------|
| Delayed initiation of adjuvant chemotherapy among women with breast cancer in Addis Ababa, Ethiopia Alem Gebremariam 2021                                                                                  | Breast   | Regional Ethiopia | January 2017 - December 2019       | Patients | 223 Other: Retrospective review and interviews<br>Homemaker 102 (45.7%);<br>Employed (governmental and private) 79 (35.4%);<br>Daily laborer 29 (12.9%)<br>Other (retired, no job) 13 (5.7%) <61.0 US dollar 58 (26%);<br>61.0-94.0 US dollar 107 (48.0%);<br>>194.0 US dollar 58 (26%)<br>Not stated/literate 37 (16.6%);<br>Primary school 60 (26.9%);<br>Secondary school 69 (30.9%);<br>Diploma and above 57 (25.6%)<br>100% female <40 years 104 (46.6%);<br>40-49 years 51                                                   | not stated                              | - the risk of delay was significantly higher among women with lower monthly family income, p=0.002<br>- Women with a monthly income of US\$<61.0 had a three times higher risk of delay (RR=3.98; 95% CI 1.67-9.46) compared to those women with a family monthly income of US\$>194.0<br>not stated<br>not stated<br>not stated<br>not stated                                                                                                                                                                                                                                                                                                                                                                                                                                                                                                                                                                                                                                                                                                                                                                                                                                                                                                                                                                                         |
| Adherence to Newly Implemented Tamoxifen Therapy for Breast Cancer Patients in Rural Western Ethiopia Christian Felix Rebeld 2020                                                                          | Breast   | Hospital Ethiopia | January 2010 - December 2015       | Patients | 51 Other: questionnaire and interviews<br>Housewife 28 (57%)<br>Farmer 17 (35%)<br>Student 1 (2%)<br>Other 3 (6%)<br>not stated/Married 38 (93%)<br>Not married 3 (7%)<br>Literate (n = 38), No 31 (77%) Yes 9 (23%)<br>100% female<br>mean 45 years (35-51)                                                                                                                                                                                                                                                                       | not stated                              | not stated<br>not stated<br>not stated- lack of consent<br>- problems on the health care provider side (12; 48%) where patients had not been given an appointment (n = 9), the physician was absent (n = 2), and other (n = 1).<br>- Reasons on the patient side (13; 52%) included lack of money (n = 2), too far to travel (n = 1), fear of treatment (n = 1), and private reasons (n = 1).<br>- No information was available for 8 patients. not stated<br>not stated                                                                                                                                                                                                                                                                                                                                                                                                                                                                                                                                                                                                                                                                                                                                                                                                                                                               |
| Factors associated with advanced stage at diagnosis of cervical cancer in Addis Ababa, Ethiopia: A population-based study Nebiyu Dereje 2020                                                               | Cervical | Regional Ethiopia | 1st January 2017 to 30th June 2018 | Patients | 212 Other: Questionnaire, case notes<br><3200 ETB =142 (67.5%) monthly<br>>3200 ETB =69(32.5%)<br>No formal education 86 (40.6%)<br>-Yes formal education 126 (59.4%) Female<br>=212<40 yrs=42 (19.8%)<br>40-59 yrs=103 (48.6%)<br>>60 yrs =67 (31.6%)                                                                                                                                                                                                                                                                             |                                         | -Religious practices/Did nothing APR=1.25, 95% CI: 1.05 to 1.53 , p=0.02<br>-visited >3 different healthcare facilities prior to diagnostic confirmation APR=1.24, 95% CI: 1.08 to 1.91 p=0.01<br>- Out of pocket medical expenses APR 1.44 (1.08-1.91), p=0.003<br>not stated -visiting more than three different health care facilities before diagnostic confirmation-medical expenses<br>-not going to facility immediately after symptom recognition                                                                                                                                                                                                                                                                                                                                                                                                                                                                                                                                                                                                                                                                                                                                                                                                                                                                              |
| Extent and predictors of delays in diagnosis of cervical cancer in Addis Ababa, Ethiopia: A population-based prospective study Nebiyu Dereje 2020                                                          | Cervical | Regional Ethiopia | 1st January 2017 to 30th June 2018 | Patients | 231 Questionnaire<br>-Housewife =114 (62.3%)<br>-Government employed =29 (12.6%)<br>-Privately employed =23(10%)<br>-Merchant =10 (4.3%)<br>-Daily laborer =13 (5.6%)<br>-Pensioner =8 (3.5%)<br>-Other 4 (1.7%) Family income per month<br><600 ETB =35 (15.2%)<br>601 - 1 650 =56 (24.2%)<br>1651 -3 200 =66 (28.6%)<br>3 201 - 5 250 =49 (21.2%)<br>5 251 -7 800=19 (8.2%)<br>>7 801 =6 (2.6%)<br>-Married 96 (41.6%)<br>-Single 11 (4.8%)<br>-Divorced 36 (15.6%)                                                              |                                         | The odds of diagnostic delays:<br>- contacted primary-level health facilities (health centers and private clinics as compared to contacted secondary- or tertiary-level health facilities (AOR, 2.6; 95% CI, 1.33 to 5.27);<br>- patients who visited, >= different health facilities for their cancer diagnosis as compared to those who visited, < 4 different health facilities (AOR, 2.7; 95% CI, 1.07 to 6.71).<br>- patients who made 5 visits to health facilities before receipt of histologic diagnostic confirmation compared to those patients who made 5 visits (AOR, 2.2; 95% CI, 1.05 to 4.43).<br>-The odds of delay in health seeking:<br>- never heard of cervical cancer before diagnosis (adjusted OR (AOR), 2.3; 95% CI, 1.11 to 4.70)<br>- waited until they saw additional symptoms (AOR, 2.3; 95% CI, 1.096 to 4.90)<br>- practiced a religious ritual as a solution for their cancer (AOR, 3.3; 95% CI, 1.46 to 7.48)<br>- Not bothered about first symptom 16 (29.6%)<br>-Thought it would go away by itself 21 (38.9%)<br>-Misinterpretation (not aware) of symptoms 14 (25.9%)<br>-Ashamed to tell anyone about symptoms 10 (18.5%)<br>-Not knowing which health facility to visit 8 (14.8%)<br>-Thought treatment would be expensive 3 (5.5%)<br>-Thought religious activities would cure problem 5 (9.3%) |
| Socio-economic and cultural vulnerabilities to cervical cancer and challenges faced by patients attending care at Tikur Anbessa Hospital: A cross sectional and qualitative study Sara Kebede Tadesse 2015 | cervical | Hospital Ethiopia | 15 April - 15 May 2013             | Patients | 198 Other: questionnaire and interview<br>Housewife 78 (39.4%)<br>Farmer 73 (36.9%)<br>Government 13 (6.6%)<br>Merchant 12 (6.1%)<br>private for profit sector 9 (4.5%)<br>Pensioner 8 (4.0%)<br>Daily laborer 2 (1.0%)<br>NGO 1 (0.5%)<br>Unemployed 1 (0.5%)<br>Temp worker 1 (0.5%)<br><500 43 (21.9%)<br>500 - 999.99 77 (42.8%)<br>1,000 - 1,499.99 29 (16.1%)<br>1,500 - 1,999.99 19 (10.6%)<br>2,000 or more 12 (6.7%)<br>Single 1 (0.5%)<br>Married 101 (51.0%)<br>Widowed 69 (34.8%)<br>Separated 19 (9.6%)<br>Divorced 8 | not stated                              | not stated<br>not stated<br>not stated<br>not stated<br>long waiting time<br>misdiagnosis<br>not clear                                                                                                                                                                                                                                                                                                                                                                                                                                                                                                                                                                                                                                                                                                                                                                                                                                                                                                                                                                                                                                                                                                                                                                                                                                 |
| Patient delay and contributing factors among breast cancer patients at two cancer referral centres in Ethiopia: A cross-sectional study Aragaw Tesfaw 2020                                                 | Breast   | Regional Ethiopia | September 2019 to April 30 2020    | Patients | 371 Questionnaire<br>Housewife 215 (58.0%)<br>Farmer 94 (25.3%)<br>Government employee 52 (14.0%)<br>Other 10 (2.7%) not stated<br>Married 298 (80.3%)<br>Single 73 (19.7%)<br>Literate 136 (36.7%)<br>Primary education 153 (41.2%)<br>Secondary education and above 82 (22.1%)<br>100% female<br>mean 40 (30-70), Mean 48.1<br><40 83 (22.4%)<br>>40 288 (77.6%)                                                                                                                                                                 | <5 km 163 (43.9%)<br>> 5 km 208 (56.1%) | not stated- more than 5 km travel distance (AOR=1.66; 95% CI=1.09-3.00)- rural residence (AOR=3.72; 95% CI=1.82-7.47)<br>- illiterate women (AOR=3.8; 95% CI=1.71-8.54)<br>- painless wound (AOR=3.32; 95% CI=1.93-5.72)<br>- no lump/swelling in their armpit (AOR=6.16; 95% CI=2.80-13.54).<br>- no previous breast problem (AOR=2.46; 95% CI=1.43-4.22)<br>not stated- Lack of awareness about early symptoms 345 (92.9%)<br>- Relating symptoms with other medical problems 132 (35.6%)<br>- Belief that breast cancer has not any medical treatment 88 (23.7%)<br>- Use of traditional and spiritual treatment options 286 (77.1%)                                                                                                                                                                                                                                                                                                                                                                                                                                                                                                                                                                                                                                                                                                |

|                                                                                                                                                              |                                                                                     |                |                                   |                                    |                                                                                                                          |                                                                                                                                                                                                                                                                                                                                                                                                                                                                                                            |             |                                                                                                                                                                                                                                                                                                                                                                                                                                                                                                                                                                                                                                                                                                                                                                                                                                                                                                                             |
|--------------------------------------------------------------------------------------------------------------------------------------------------------------|-------------------------------------------------------------------------------------|----------------|-----------------------------------|------------------------------------|--------------------------------------------------------------------------------------------------------------------------|------------------------------------------------------------------------------------------------------------------------------------------------------------------------------------------------------------------------------------------------------------------------------------------------------------------------------------------------------------------------------------------------------------------------------------------------------------------------------------------------------------|-------------|-----------------------------------------------------------------------------------------------------------------------------------------------------------------------------------------------------------------------------------------------------------------------------------------------------------------------------------------------------------------------------------------------------------------------------------------------------------------------------------------------------------------------------------------------------------------------------------------------------------------------------------------------------------------------------------------------------------------------------------------------------------------------------------------------------------------------------------------------------------------------------------------------------------------------------|
| Why do breast cancer patients report late or abscond during treatment in Ghana? A pilot study. J. Clegg-Lampstej 2009                                        | Breast                                                                              | Hospital Ghana | September 2007 - July 2008        | Patients                           | 101 Questionnaire                                                                                                        | -Single new patients 15 (19%), defaulters 2 (5.7%)<br>-Married patients 38 (57.7%), defaulters 32 (88.6%)<br>-Divorced/separated new patients 3 (4.2%), defaulters 2 (5.8%)<br>-Widowed new patients 22 (18.2%)<br>-Nil New patients 11 (16%), defaulters 5 (14.3%)<br>- Primary new patients 15 (22.7%), defaulters 5 (14.3%)<br>-Secondary new patients 18 (27.3%), defaulters 20 (57.1%)<br>- Tertiary new patients 22 (33.3%) 5 (14.3%)<br>defaulters:101 women-new patients: mean 44.8, median 43 yrs |             | Defaulters<br>- Fear of mastectomy 20 (57.1%),<br>-herbal treatment 13 (37.1%),<br>-Financial incapability 11 (31.4%),<br>-Prayers and Prayer camps 10 (28.6%),<br>-Chinese medication 5 (14.3%)<br>-observing 3 (8.6%)<br>-Ulcer healed. Thought disease was healed 2 (5.7%),<br>-Had complete clinical response 2 (5.7%),<br>-food supplement 2 (5.7%),<br>-exercising faith 2 (5.7%)<br>-Side effects of drugs 1 (2.9%)<br>- Pressure from in-laws to refuse mastectomy 1(2.9)<br>- Father refused treatment 1 (2.9%),<br>-family commitments (2.9%),<br>-acupuncture treatment at 1 (2.9%)-previous medical consultation 26 (29.4%)<br>-Financial incapability<br>New patients<br>-ignorance 19 (28.8%),<br>-fear of mastectomy 16 (24.2%),<br>-herbal treatment 13(19.7%),<br>-prayers and prayer camps 13(19.7%),<br>-financial incapability 12 (18.2%),<br>-fear of diagnosis 7 (10.6%),<br>-other spiritual 6(9.1%) |
| Factors contributing to delays in diagnosis of breast cancers in Ghana, West Africa Louise Brinton 2016                                                      | Breast cancer                                                                       | Regional Ghana | -                                 | Patients                           | 1184 Questionnaire                                                                                                       | 1184 women<40 246 (20.8%)<br>40-44 158 (13.3%)<br>45-49 188 (15.9%)<br>50-54 167 (14.1%)<br>55-59 150 (12.7%)<br>60-64 113 (9.5%)<br>65-69 63 (5.3%)<br>>70 = 95 (8.0%)<br>Unknown = 4 (0.3%)                                                                                                                                                                                                                                                                                                              |             | Other predictors of large tumours are seeking assistance from someone other than a doctor or nurse for breast symptoms (2.65, 1.31, A15.40). -low education having an OR of 2.11 (95% CI1.47-3.04)<br>-divorced/separated OR 1.65 (1.15-2.37) or widowed women OR 2.16 (1.42-3.28)<br>-Consulting a traditional healer and using traditional medication                                                                                                                                                                                                                                                                                                                                                                                                                                                                                                                                                                     |
| Financial barriers related to breast cancer screening and treatment: A cross-sectional survey of women in Kenya Suha Subramanian 2019                        | Breast                                                                              | Regional Kenya | November 2017 to April 2018       | Patients                           | 800 Questionnaire                                                                                                        | with BC 132<br>without BC 258 -<br>Never married: With BC 41 without 79<br>-Married/ living together: With BC 244 without 226<br>-Divorced/ separated: With BC 68 without 63<br>-Widowed: With BC 46 without 30<br>-Missing: With BC 41 without 2<br>None:With BC 10; Without 6<br>- Primary: With BC 136 Without 101<br>- Secondary/Vocational: With BC 149 Without 154<br>- College05: With BC 70 Without 109<br>-University:With BC 32 Without 26                                                       |             | -Cost of going to the doctor 46.3%<br>-Inability to discuss symptoms confidently 10.0%<br>-Difficulties setting up appointment 9.8%<br>-Communication barriers 6.5%<br>-Fear of wasting the doctor's time 3.3%<br>-transportation barriers 23.3%<br>-Transportation barriers 23.3%<br>-Busy schedule 9.0%<br>-Disapproval of family and friends 3.8%<br>-Embarrassment 6.5%<br>-Fear of what the doctor might find 19.3%<br>-General fear of the doctors visit 19.3%                                                                                                                                                                                                                                                                                                                                                                                                                                                        |
| Patient factors affecting successful linkage to treatment in a cervical cancer prevention program in Kenya: A prospective cohort study Charlotte M Page 2019 | cervical cancer                                                                     | Regional Kenya | February - October 2018           | Community                          | 505 Other: prospective cohort                                                                                            | No 214(42%)<br>Yes 291(58% not stated)Not partnered 132(27%)<br>Partnered 366 (73%)Primaryschool or less 428 (85%)<br>At least some secondary 77 (15%)100% femalemedian 33 (27-42)                                                                                                                                                                                                                                                                                                                         | 8 km (5-12) | not stated- primary school education or less<br>- women who did not miss work to come to CHC<br>not statednot statednot statednot stated                                                                                                                                                                                                                                                                                                                                                                                                                                                                                                                                                                                                                                                                                                                                                                                    |
| Prevalence and Capacity of Cancer Diagnostics and Treatment: A Demand and Supply Survey of Health-Care Facilities in Kenya Francis W Wambalaba 2019          | Cervix, Breast, Esophagus, Prostate, Ovary, Colon, Thyroid, Pancreatic, Lung, Liver | National Kenya | November 2013 - February 2014     | Other: Patients and administrators | 1048 Other: - patient data from records - interviews with volunteer patients -survey data from hospital medical officers | not stated not statednot statednot statedFemale 57% Male 43%Female 52 years Men 62 years                                                                                                                                                                                                                                                                                                                                                                                                                   | not stated  | not statednot statednot stated- preventive services limited not statednot stated                                                                                                                                                                                                                                                                                                                                                                                                                                                                                                                                                                                                                                                                                                                                                                                                                                            |
| Delayed presentation of breast cancer patients. E.S. Otieno 2010                                                                                             | Breast                                                                              | Hospital Kenya | 1 October 2003 to 31st March 2006 | Patients                           | 166 Questionnaire                                                                                                        | 98.8% femalemean age 47, age range 17 to 88                                                                                                                                                                                                                                                                                                                                                                                                                                                                |             | -Reassured that their condition was benign by the first medical personnel they visited 40 (24.1% cumulative %24.1)-Painless symptomatology 39 ( 23.5%, cumulative% 47.6)<br>-Not aware of the disease 13 ( 7.8%, cumulative % 84.9)<br>-Worried they would be diagnosed with cancer 33 (19.9%, cumulative % 67.5)<br>-Attending to traditional healers and taking herbal preparations 16 (9.6% cumulative % 77.1)                                                                                                                                                                                                                                                                                                                                                                                                                                                                                                           |
| Health system organisation and patient pathways: breast care patients' trajectories and medical doctors' practice in Mali Kirsten Grosse Frie 2019           | Breast                                                                              | Regional Mali  | 1 January 2016 - April 2016       | Patients and clinicians            | 124 Questionnaire                                                                                                        | Housewife 55 (44.4%);<br>Public service 19 (15.3%);<br>Business 9 (7.3%);<br>Student 9 (7.3%);<br>Other 32 (25.8%) not statedMarried 83 (66.9%)<br>Single 14 (11.3%)<br>Divorced 7 (5.6%)<br>Widowed 20 (16.1%)not stated100% female16-24 42 (33.9%);<br>35-49 47 (37.9%);<br>50-80 35 (28.2%)                                                                                                                                                                                                             | not stated  | - community healthcare centres and private clinics first contact<br>n/a-Having someone in the family with breast cancer was also associated with a delay of >6 months in acknowledging breast symptoms (p=0.028). -knowledge about breast n/a-no health insurance<br>-traditional healer                                                                                                                                                                                                                                                                                                                                                                                                                                                                                                                                                                                                                                    |

|                                                                                                                                                                                         |                                                                                           |                                                    |                                 |          |                             |                                                                                                                                                                                                                                                                                                                                                                                                                                                                          |                                                                                 |                                                                                                                                                                                                                                                                                                                                                                                                                                                                                                                                                                                                                                                                                                                                                                                                                                                                                                                                                                                                                                                                                                                                                                                                                                                                                                                                                                                                                                                                                                                                                                                                                                                                                                                                                                                                                                                                      |
|-----------------------------------------------------------------------------------------------------------------------------------------------------------------------------------------|-------------------------------------------------------------------------------------------|----------------------------------------------------|---------------------------------|----------|-----------------------------|--------------------------------------------------------------------------------------------------------------------------------------------------------------------------------------------------------------------------------------------------------------------------------------------------------------------------------------------------------------------------------------------------------------------------------------------------------------------------|---------------------------------------------------------------------------------|----------------------------------------------------------------------------------------------------------------------------------------------------------------------------------------------------------------------------------------------------------------------------------------------------------------------------------------------------------------------------------------------------------------------------------------------------------------------------------------------------------------------------------------------------------------------------------------------------------------------------------------------------------------------------------------------------------------------------------------------------------------------------------------------------------------------------------------------------------------------------------------------------------------------------------------------------------------------------------------------------------------------------------------------------------------------------------------------------------------------------------------------------------------------------------------------------------------------------------------------------------------------------------------------------------------------------------------------------------------------------------------------------------------------------------------------------------------------------------------------------------------------------------------------------------------------------------------------------------------------------------------------------------------------------------------------------------------------------------------------------------------------------------------------------------------------------------------------------------------------|
| Geospatial barriers to healthcare access for breast cancer diagnosis in sub-Saharan African settings: The African Breast Cancer AIDisparities in Outcomes Cohort Study Kayo Togawa 2020 | Breast                                                                                    | Hospital<br>Namibia<br>Nigeria<br>Uganda<br>Zambia | September 2014 - September 2017 | Patients | 1518<br>Other:<br>Interview | not stated not stated-not stated/primary school or less 681 (45%)<br>Secondary/high school 509 (34%)<br>Technical/university 328 (22%)100% womenmean 50 years +/- 13 19-97                                                                                                                                                                                                                                                                                               | not clear                                                                       | not stated<br>- rural residence OR=1.40, 95% CI: 1.06-1.84<br>- distance (OR per 50 km increment OR = 1.04, 95% CI: 1.00-1.09, P 0.048not stated-Cost of diagnostic tests/treatment -Transport<br>-Hospital too far<br>-Difficulty with making an appointment or reaching doctor<br>-Other obligations/no permission from family member<br>-Embarrassment<br>-Pain or discomfort<br>-Fear of dying/treatment<br>-No trust in medicine/prefer traditional healer                                                                                                                                                                                                                                                                                                                                                                                                                                                                                                                                                                                                                                                                                                                                                                                                                                                                                                                                                                                                                                                                                                                                                                                                                                                                                                                                                                                                      |
| Prevalence and Pattern of Late Stage Presentation in Women with Breast and Cervical Cancers in Lagos University Teaching Hospital, Nigeria. Opeyemi Awofeso 2018                        | Breast 85<br>Cervical 20                                                                  | Hospital<br>Nigeria                                | April to June 2016              | Patients | 105<br>Questionnaire        | Not stated <N9000 57 (54.3%)<br>N9001-N18,00 24 (22.9%)<br>N18,001-N50,000 15 (14.3%)<br>N50,001-N90,000 7 (6.7%)<br>N90,001-N150,000 1 (1.0%)<br>N90,001-N150,000 1 (1.0%)<br>N150,000 1 (1.0%)Single 4 (3.8%)<br>Married 86 (81.9%)<br>Divorced/separated 3 (2.9%)<br>Widowed 12 (11.4%)None 7 (6.7%)<br>Primary 26 (31.4%)<br>Secondary 33 (31.4%)<br>Post secondary 39 (37.1%)Females: 105 (100%)All - mean age                                                      | <30 min 3 (2.9%)<br>30 min-1h 23 (21.9%)<br>1-2 h 26 (24.8%)<br>>2 h 53 (50.5%) | -Systemic delay $\chi^2$ 8.1 p=0.0174-Patient delay $\chi^2$ 8.5p=0.0363<br>-Misdiagnosis at lower levels of health care $\chi^2$ 7.11 p=0.0077<br>-Delayed investigation time $\chi^2$ 14.88 p=0.0001<br>-Ignorance and lack of personal initiative $\chi^2$ 5.07 p= 0.0243<br>-unavailability of appropriate treatment modality-investigation time at first contact<br>-misdiagnosis at lower levels-ignorance and lack of personal initiative<br>-preference for alternative medicine<br>fear<br>-myths and misconceptions                                                                                                                                                                                                                                                                                                                                                                                                                                                                                                                                                                                                                                                                                                                                                                                                                                                                                                                                                                                                                                                                                                                                                                                                                                                                                                                                        |
| Effect of Sociodemographic Variables on Patient and Diagnostic Delay of Breast Cancer at the Foremost Health Care Institution in Nigeria. Sunday O Oluwajuwaju 2019                     | breast                                                                                    | Hospital<br>Nigeria                                | August - October 2018           | Patients | 275<br>Questionnaire        | Unemployed 124 (45.1%)<br>Employed 151 (54.9%) <18,000 99 (36%)<br>>18,000 475 (64%)Single 12 (4.4%)<br>Married 193 (70.2%)<br>Divorced/separated 19 (6.9%)<br>Widowed 51 (18.5%)Primary 46 (16.7%)<br>Secondary 87 (31.6%)<br>Tertiary 142 (51.6%)100% femalemean 49 +/- 11.9                                                                                                                                                                                           | not stated                                                                      | not stated marital status p=0.00-Age p=0.023 -ethnicity p=0.024 -marital status p=0.009High cost of medicine 71 (73.2%)Obligations at home 77 (91.7%)<br>High cost of prediagnostic test 69 (82.1%)<br>Earlier alternative treatment 66 (78.6%)<br>High cost of transportation 13 (15.5%)Obligations at home 75 (77.3%)<br>High cost of transportation 74 (76.3%)<br>Stigma of disease 71 (73.2%)<br>Denial or anxiety 71 (73.2%)<br>Fear of seeking medical advice 69 (71.1%)<br>Earlier alternative treatment 52 (53.6%) Non-awareness of the disease 38 (39.2%)<br>Fear of diagnosis 67 (79.8%)                                                                                                                                                                                                                                                                                                                                                                                                                                                                                                                                                                                                                                                                                                                                                                                                                                                                                                                                                                                                                                                                                                                                                                                                                                                                   |
| Acceptance and adherence to treatment among breast cancer patients in Eastern Nigeria. Stanley N.C. Anyanwu 2011                                                                        | breast                                                                                    | Hospital<br>Nigeria                                | 2004 to 2008                    | Patients | 275 Case note               | primary 215 (80%)<br>high school/tertiary 168 (60%) females 273<br>male 2<30yrs 19 (6.9%)<br>30-39 yrs 74 (26.9%)<br>40-49 yrs 77 (28.0%)<br>50-59 yrs 50 (18.2%)<br>60-69 yrs 39 (14.2%)<br>>70 yrs 16 (5.8%)                                                                                                                                                                                                                                                           |                                                                                 | - Declined any form of treatment 65 (37.6%)<br>-Accepted single treatment modality 57 (32.9%)<br>-Cost of drugs, laboratory expenses and transportation to the hospital.<br>- No bed space<br>-No relatives to care for them during treatment -distance Distance                                                                                                                                                                                                                                                                                                                                                                                                                                                                                                                                                                                                                                                                                                                                                                                                                                                                                                                                                                                                                                                                                                                                                                                                                                                                                                                                                                                                                                                                                                                                                                                                     |
| Presentation intervals and the impact of delay on breast cancer progression in a black African population Olayide Agodirin 2020                                                         | Breast                                                                                    | Regional<br>Nigeria                                | June 2017-May 2018              | Patients | 420<br>Questionnaire        | Not stated Not stated married 285 (68%)<br>widow 48 (11.5%)<br>single 23 (5.5%)<br>separat/divorced 7 (1.7389%)<br>unspecified 57 (13.3%)tertiary 144 (34.3%)<br>secondary 124 (29.5%)<br>primary 66 (15.7%)<br>none 79 (18.8%)<br>unspecified 7 (1.7%)<br>420 females (100%)21:30 = 16 (3.8%)<br>31-40 =92 (22)<br>41-50 =119 (28.2%)<br>51-60 =92 22%)                                                                                                                 | Not stated                                                                      | -The PCI (median 106, 13-327) was significantly longer than the HSI (median 42, 7-150). Wilcoxon-Signed Rank test p= 0.0001.(paired t-test mean difference 140 -s442 days (95% CI 95-186).<br>-Most respondents disclosed early within 30 days (330 (81, 95% CI 77-85) and consulted FHP within 60 days (230 (60, 95% CI 53-63).<br>-Most respondents had long PCI of > 30 days. 1-7 days in 91(25% (95% CI 20-29), 1-30 days in 134 (36 95% CI31-41) and > 30 days in 237 out of 377(64 95% CI 59-68).<br>-The SCI was > 90 days in 293 of 401 (73% (95% CI68-77), 91-180 days in 70 of 401 (17% (95% CI 14-22)and > 180 days in 226 of 401 (56% (95% CI 51-61)<br>-More respondents with big (> 5 cm) tumors received correct advice compared to those with small tumors(Risk difference 5.5% (95% CI 4.0-15).<br>no associations given- misdiagnosis<br>- strike 4.0 (2.4%)<br>- Navigation in primary care 1.0 (0.6%)<br>-Misdiagnosis/ investigations 46 (27.5%)<br>- financial constraint 33 (19.7%)<br>- family issues 2.0 (1.2%)<br>- reassured by first home person or first health care provider 7.0 (4.2%)<br>- distance 3.0 (1.7%)<br>- financial constraint 18 (10.5%) -ignorance 6 (3.5%)<br>- pregnancy/ lactation/ menopause 8 (4.6%)<br>- thought benign/thought will disappear 50 (29%)<br>- small size 2 (1.2%)<br>- lump only 2 (1.2%)                                                                                                                                                                                                                                                                                                                                                                                                                                                                                                           |
| Infrastructural challenges lead to delay of curative radiotherapy in Nigeria Jim Leng 2020                                                                                              | - breast (37.5%),<br>- cervical (16.3%),<br>- head and neck (11.9%)<br>- prostate (10.9%) | Hospital<br>Nigeria                                | June 2017 to August 2017        | Patients | 186<br>Questionnaire        | None 37 (19.9%)<br>Trader 68 (36.6%)<br>Farmer 9 (4.8%)<br>Artisan 23 (12.4%)<br>Professional 38 (20.4%)<br>Other 11 (5.9%) The median monthly income 15,000 naira (5,000 - 40,000)which converts to approximately 50 dollars per month.<br>Married 162 (87.1%),<br>Widowed 12 (6.5%)<br>Divorced (0.5%)<br>Separated 1 (0.5%)<br>Never married 10 (5.4%)None 20 (10.9%)<br>Primary 46 (25.0%)<br>Secondary 52 (28.3%)<br>Vocational/technical 18 (9.8%)<br>Diploma/OND/ |                                                                                 | -Inability to pay time to clinic visit OR=1.99 (1.05 to 3.77) P= .034* Time to radiotherapy treatment OR= 1.85 (0.95 to 3.57) Time to radiotherapy treatment p=.069<br>-Infrastructural factors include:<br>-Machine breakdown time to clinic visit OR=1.39 (0.78 to 2.48) P= .264 Time to radiotherapy treatment OR=2.92 (1.54 to 5.53) P=.001*<br>-Worker strike time to visit clinic OR= 0.65 (0.38 to 1.13) P= .127 Time to radio therapy treatment OR=2.64 (1.46 to 4.79)P= .001<br>-Power outage time to visit clinic OR=1.88 (0.8 to 4.42) P=.147 Time to radiotherapy treatment OR=2.81 (1.16 to 6.79) P= .022*<br>-Sociocultural factors include:<br>-Lack of knowledge of appropriate medical facility, time to clinic visit OR 4.96 (2.41 to 10.21),P<.001* time to radiotherapy treatment OR=1.92 (0.89 to 4.15) P= .099<br>-Not wanting others to know of sickness time to clinic visit OR 3.63 (1.35 to 9.72) P=.011* Time to radiotherapy treatment OR=1.75 (0.67 to 4.58) P=.253<br>-Tried another treatment first, time to clinic visit OR 2.45 (1.26 to 4.76) P=.008* Time to radiotherapy treatment OR= 1.50 (0.75 to 2.97) P=.248<br>-Fear of treatment , time to clinic visit OR 0.90 (0.5 to 1.63) P= .732 time to radiotherapy treatment OR 0.42 (0.22 to 0.81) P= .009*<br>-Concern over cost of travel for treatment Time to clinic visit OR= 1.19 (0.7 to 2.04) P= .523 time to radiotherapy treatment OR= (0.3 to 0.95) P=.033*<br>-Previous bad experience at hospital ,time to clinic visit OR=7.05 (2.15 to 23.12) P= .001* time to radiotherapy treatment OR= 2.19 (0.67 to 7.09) P=.192<br>-treatment might be too expensive<br>- Infrastructural barriers increased the odds of radiotherapy delay<br>- Health care worker strikes<br>- Machine breakdowns<br>- power outages<br>-power out of socket for their treatment equipment |

|                                                                                                                                                                                                  |                                                                                      |                  |                          |                             |                          |                                                                                                                                                                                                                                                                                                                                                                                                                                         |                                                                                                                                                                                                 |                                                                                                                                                                                                                                                                                                                                                                                                                                                                                                                                                    |
|--------------------------------------------------------------------------------------------------------------------------------------------------------------------------------------------------|--------------------------------------------------------------------------------------|------------------|--------------------------|-----------------------------|--------------------------|-----------------------------------------------------------------------------------------------------------------------------------------------------------------------------------------------------------------------------------------------------------------------------------------------------------------------------------------------------------------------------------------------------------------------------------------|-------------------------------------------------------------------------------------------------------------------------------------------------------------------------------------------------|----------------------------------------------------------------------------------------------------------------------------------------------------------------------------------------------------------------------------------------------------------------------------------------------------------------------------------------------------------------------------------------------------------------------------------------------------------------------------------------------------------------------------------------------------|
| Geospatial access predicts cancer stage at presentation and outcomes for patients with breast cancer in southwest Nigeria: A population-based study Gregory C Knapp 2020                         | Breast                                                                               | Hospital Nigeria | May 2009 - January 2019  | Patients                    | 609 Retrospective cohort | not stated<br>Socioeconomic status<br>Low 417 (68.5%)<br>Middle 185 (30.4%)<br>High 7 (1.2%)<br>not stated None 56 (9.3%)<br>Primary 196 (32.4%)<br>Secondary 141 (23.3%)<br>Tertiary 212 (35.0%)<br>Female 598 (98.2%)<br>Male 11 (1.8%)<br>median 49 (40-58)                                                                                                                                                                          | not stated                                                                                                                                                                                      | not stated - primary education only (21.9%; P= .002)<br>- longer travel times 2.8-fold increased (95% CI, 1.30-6.11; P= .006)<br>not stated not stated not stated not stated                                                                                                                                                                                                                                                                                                                                                                       |
| Complementary and alternative medicine. Use and challenges among gynaecological cancer patients in Nigeria: Experiences in a tertiary health institution - Preliminary results T.O. Nwankwo 2019 | Cervical 42, ovarian 31, endometrial 8, vulva 5, choriocarcinoma 4, leiomyosarcoma 4 | Hospital Nigeria | June 2014 to June 2020   | Patients                    | 95 Questionnaire         | Trader 37 (38.9%)<br>Artisan/farmer 23 (24.2%)<br>Professional/Civil servant 18 (19.0%)<br>Unemployed 17 (17.9%)<br>Income < monthly expenses 59 (62.0%)<br>Income => monthly expenses 36 (38.0%)<br>Single 13 (13.7%)<br>Married 77 (81.1%)<br>Divorced/separated 5 (5.3%)<br>Primary/non formal 44 (46.3%)<br>Secondary 28 (29.5%)<br>Tertiary 23 (24.2%)<br>21-30 2 (2.1%)<br>31-40 17 (17.9%)<br>41-50 27 (28.4%)<br>>50 49 (51.6%) |                                                                                                                                                                                                 | - recommendation from friends and relatives (pvalue = 0.017)<br>- income was less than monthly expenditure<br>- duration of illness was equal or greater than six months pvalue = 0.02, OR = 0.36 CI 0.15-0.86- Complementary and alternative medicine use<br>- Herbs<br>- spiritual sacrifice<br>- diet modification<br>- Chinese medicine<br>- prayers combined with other methods                                                                                                                                                               |
| Effect of sociodemographic variables on patient and diagnostic delay of breast cancer at the foremost health care institution in Nigeria Sunday Oluwajuwaju 2019                                 | Breast                                                                               | Hospital Nigeria | August - October 2018    | Patients                    | 275 Questionnaire        | Unemployed 124 (45.1%)<br>Employed 151 (54.9%)<br><18,000 99 (36%)<br>>18,000 176 (64%)<br>Single 12 (4.4%)<br>Married 193 (70.2%)<br>Divorced/separated 19 (6.9%)<br>Widowed 51 (18.5%)<br>Primary 46 (16.7%)<br>Secondary 87 (31.6%)<br>Tertiary 142 (51.6%)<br>100% women<br>Mean 49 +/- 11.9                                                                                                                                        | not stated                                                                                                                                                                                      | not stated - marital status, p=00 (single at higher risk of late stage diagnosis)- Age p=0.023<br>- ethnicity p=0.024<br>- marital status p=0.009<br>High cost of prediagnostic test<br>Obligations at home<br>High cost of transportation n = 97<br>- Obligations at home<br>- High cost of transportation<br>- Stigma of disease<br>- Denial or anxiety<br>- High cost of medicine<br>- Fear of seeking medical advice<br>- Earlier alternative treatment<br>- Nonawareness of the disease                                                       |
| Impact of Primary Care Delay on Progression of Breast Cancer in a Black African Population: A Multicentered Survey Olayide Agodirin 2019                                                         | Breast cancer                                                                        | Regional Nigeria | May 2017 - July 2018     | Patients                    | 237 Questionnaire        | married 167 (70.5%)<br>single 11 (4.6%)<br>divorced or separated 4 (1.7%)<br>widow 22 (9.3%)<br>unspecified 33 (13.9%)<br>tertiary 91 (38.3%)<br>secondary 78 (33%)<br>primary 30 (12.7%)<br>none 38 (16%)<br><= 30 18 (7.6%)<br>31-40 51 (21%)<br>41-50 74 (31.2%)<br>51-60 46 (19.4%)<br>61-70 24 (10.1%)<br>>= 71 24 (10.1%)                                                                                                         |                                                                                                                                                                                                 | - Misdiagnosis<br>- Misinformation by FHP - Distance to specialist clinic - Fear of treatment most probably mastectomy<br>- Age<br>- Distance to specialist clinic<br>- Need for social acceptability                                                                                                                                                                                                                                                                                                                                              |
| Health-seeking behavior and barriers to care in patients with rectal bleeding in Nigeria Oluwasegun I. Alatise 2017                                                                              | colorectal cancer                                                                    | Hospital Nigeria | 2013 to 2014             | Other: patients, physicians | 127 Questionnaire        | <5100 =49 (59.8%)<br>>5101= 33 (40.2%)<br>Married 69= (84.2%)<br>Single 12= (14.6%)<br>Widow 1= (1.2%)<br>- No formal or primary education 23 (28.1%)<br>- Secondary education 27 (32.9%)<br>- Tertiary education 32 (39.0%)<br>Male = 64 (78.1%)<br>Female = 18 (22.0%)<br><45 =41 (50.6%)<br>>46 =40 (49.4%)                                                                                                                          |                                                                                                                                                                                                 | - Hospital bottlenecks<br>- misdiagnosis<br>- Unknown availability or cost of colonoscopy<br>- Not serious<br>- symptom cleared<br>- Embarrassing<br>- Knew the cause<br>- Fear of unknown<br>- No money<br>- Religious beliefs<br>- belief in herbal medicine                                                                                                                                                                                                                                                                                     |
| Determinants of stage at diagnosis of breast cancer in Nigerian women: sociodemographic, breast cancer awareness, health care access and clinical factors Elima Jedy-Agba 2017                   | Breast                                                                               | National Nigeria | January 2014 - July 2016 | Patients                    | 316 Other: Case-control  | not stated<br>Personal income yes early 23 (25.6%) late 67 (74.4%)<br>Personal income no early 74 (35.2%) 136 (64.8%)<br>Married: early 71 (33.6%) late 140 (66.4%)<br>None: early 5 (12.2%) late 36 (87.8%)<br>Primary/Secondary: early 33 (29.2%) late 80 (70.8%)<br>Tertiary/Post graduate (PG): early 59 (41.3%) late 84 (58.7%)<br>Not reported early 0 (0) late 3 (100%)<br>100% women<br>mean age 45.4 (SD 11.4)                 | < 1 hour: early 66 (36.1%) late 117 (63.9%)<br>1 - < 2 hours: early 15 (33.3%) late 30 (66.7%)<br>>= 2 hours: early 5 (22.7%) late 17 (77.3%)<br>Not reported: early 11 (22.0%) late 39 (78.0%) | - lower educational level (p=0.002);<br>- no formal education 2.75 (95% CI 1.37, 5.52, p=0.004)<br>- In age-adjusted analysis, the odds of later stage were positively associated with the amount of travel time taken by the woman to reach the first healthcare provider she visited (p<0.04) - never having heard of BC OR=2.24; 95% CI 1.25, 4.03; p=0.01<br>- Women who did not believe in a BC cure (OR=2.23; 95% CI 1.40, 3.56; p=0.001)<br>- did not practice BSE (OR=1.89; 95% CI 1.20, 2.99; p=0.01)<br>not stated not stated not stated |

|                                                                                                                                                                    |                                                              |                  |                                      |            |                   |                                                                                                                                                                                                                                                                                                                                        |                                                                                                                                                                                                                                                                                                                                                                                                                                                                                                                                                                                                                                                                                                                                                                                                                                                                                                                                                                                                                                                                                                                                                                                                                                                                                                                                                                                                                                                                                                                                                                                                                                                                                                                                                                                                                                                                                                                                                                                                      |
|--------------------------------------------------------------------------------------------------------------------------------------------------------------------|--------------------------------------------------------------|------------------|--------------------------------------|------------|-------------------|----------------------------------------------------------------------------------------------------------------------------------------------------------------------------------------------------------------------------------------------------------------------------------------------------------------------------------------|------------------------------------------------------------------------------------------------------------------------------------------------------------------------------------------------------------------------------------------------------------------------------------------------------------------------------------------------------------------------------------------------------------------------------------------------------------------------------------------------------------------------------------------------------------------------------------------------------------------------------------------------------------------------------------------------------------------------------------------------------------------------------------------------------------------------------------------------------------------------------------------------------------------------------------------------------------------------------------------------------------------------------------------------------------------------------------------------------------------------------------------------------------------------------------------------------------------------------------------------------------------------------------------------------------------------------------------------------------------------------------------------------------------------------------------------------------------------------------------------------------------------------------------------------------------------------------------------------------------------------------------------------------------------------------------------------------------------------------------------------------------------------------------------------------------------------------------------------------------------------------------------------------------------------------------------------------------------------------------------------|
| Delay in presentation of cancer patients for diagnosis and management: An institutional report A Oladeji 2017                                                      | Uterine cervix, breast, head and neck, prostate, GIT, others | Hospital Nigeria | June 2014 to May 2015                | Patients   | 218 Questionnaire | 21 to 83                                                                                                                                                                                                                                                                                                                               | <ul style="list-style-type: none"> <li>-Fear of treatment side effects</li> <li>-Financial constraints</li> <li>- inadequate facilities</li> <li>-Challenges of distance to treatment center</li> <li>-Lack of family support</li> <li>-Lack of awareness of cancer symptoms</li> <li>-Using food supplements</li> <li>-Treatment received by cancer patients at point of first presentation include spiritual care (prayers), herbal medicine</li> <li>-Seeking alternative therapy</li> <li>-Fear of diagnosis of cancer</li> </ul>                                                                                                                                                                                                                                                                                                                                                                                                                                                                                                                                                                                                                                                                                                                                                                                                                                                                                                                                                                                                                                                                                                                                                                                                                                                                                                                                                                                                                                                                |
| Factors contributing to poor management outcome of sinonasal malignancies in South-west Nigeria. A.J.Fasunla 2013                                                  | Sinonasal Malignancies                                       | Hospital Nigeria | March 2006 - February 2011           | Patients   | 61 Questionnaire  | <p>none stated Low socioeconomic class 80.3%</p> <p>High socioeconomic class 4.9%Married 39 (63.9%)</p> <p>Not married 22 (36.1%)No post secondary education 40 (65.6%)</p> <p>With post secondary education 21 (34.4%)females 33 (54.1%)</p> <p>males 28 (45.9%)mean age 37 years +/- 19.4 (range 4 years - 72 years)</p>             | <p>Not stated</p> <ul style="list-style-type: none"> <li>-noneNoneNone-high cost of medical treatment</li> <li>- patients, wrong advice - attitude of hospital staff</li> <li>- lack of confidence in orthodox therapy</li> <li>- proximity to health facility</li> <li>-traditional and religious belief</li> </ul>                                                                                                                                                                                                                                                                                                                                                                                                                                                                                                                                                                                                                                                                                                                                                                                                                                                                                                                                                                                                                                                                                                                                                                                                                                                                                                                                                                                                                                                                                                                                                                                                                                                                                 |
| Delays in presentation and treatment of breast cancer in Enugu, Nigeria ER Ezeome 2009                                                                             | Breast                                                       | Hospital Nigeria | June 1999 to May 2005                | Patients   | 164 Questionnaire | <p>Married 116 (71.2%)</p> <p>Not married 19 (11.7%)</p> <p>Widowed 24 (14.7%)</p> <p>Divorced/separated 4 (2.5%)Non 24 (15.2%)</p> <p>Primary 38 (24.2%)</p> <p>Secondary 45 (28.7%)</p> <p>Tertiary 47 (29.9%)</p> <p>Higher Degree 3 (1.8%)162 female</p> <p>2 maleage range 21 - 77 yrs mean age of 45.7 yrs, median age of 45</p> | <ul style="list-style-type: none"> <li>-wrong advice and false reassurances from the initial doctor or health professional</li> <li>-delays in getting biopsy or histology reports</li> <li>-physician's failure to get biopsy or histology at the initial evaluation</li> <li>-inertial actions in the hospitals - did not consider the symptoms serious or thought it will disappear</li> <li>-did not know the implication of the abnormality</li> <li>-lacked finance to go for treatment</li> <li>- alternative practitioners and prayer houses</li> <li>- did not experience pain and therefore did not present earlier</li> </ul>                                                                                                                                                                                                                                                                                                                                                                                                                                                                                                                                                                                                                                                                                                                                                                                                                                                                                                                                                                                                                                                                                                                                                                                                                                                                                                                                                             |
| Delayed treatment of symptomatic breast cancer: The experience from Kaduna, Nigeria A. Y. Ukwanya 2008                                                             | Breast                                                       | Hospital Nigeria | 1st July 2003 to 30 June 2005        | Patients   | 111 Questionnaire | <p>Currently married 97</p> <p>Currently unmarried 14</p> <p>literate/primary 59</p> <p>Secondary/tertiary 52</p> <p>Median age among those admitted for treatment within a month 50 after a month 43</p>                                                                                                                              | <p>Provider delay</p> <ul style="list-style-type: none"> <li>-Failure to refer patient at first consultation 40 (40.4%)</li> <li>Attempted treatment by lumpectomy with recurrence 15(15.1%)</li> <li>-Lump not sent for histopathological examination 14(14.1%)</li> <li>-Patient not counselled about seriousness of breast lump 13(13.1%)</li> <li>-Breast lump mistakenly incised as an abscess 10 (10.1%)</li> <li>-Breast lump not felt at initial examination 7 (7%)</li> <li>-Biopsy result not immediately communicated to patient 4 (4%)</li> <li>-Initial biopsy diagnosis of benign disease 3(3%)</li> </ul> <p>Patient reasons for delay are</p> <ul style="list-style-type: none"> <li>-Family refused hospital treatment 25 (25.3%)</li> <li>-Did not want mastectomy as treatment 21 (21.2%)</li> <li>- Could not initially afford hospital treatment 13(13.1%) - Patient not aware of seriousness of a lump in the breast 47(47.5%)</li> <li>- Went for alternative (traditional/spiritual) treatment 38(38.4%)</li> </ul>                                                                                                                                                                                                                                                                                                                                                                                                                                                                                                                                                                                                                                                                                                                                                                                                                                                                                                                                                          |
| Cancer Control at the District Hospital Level in Sub-Saharan Africa: An Educational and Resource Needs Assessment of General Practitioners. Allison N. Martin 2019 | cancer type not specified (provider study)                   | National Rwanda  | early 2017                           | Clinicians | 73 Questionnaire  | <p>doctors not statednot statedfirst year general practitioners (doctors)Female 15 (21.1%)</p> <p>Male 56 (78.9%)20-24 2 (2.7%)</p> <p>25-29 64 (87.7%)</p> <p>30-34 5 (6.9%)</p> <p>&gt;35 2 (2.7%)</p>                                                                                                                               | <p>n/a</p> <ul style="list-style-type: none"> <li>-n/an/an/a-referrals with lack of specific appointments to specialists</li> <li>- lack of pathology or screening services 47 (49%)</li> <li>- inability to afford clinic visits 48 (66%) - lack of awareness of symptoms 65 (89%)</li> </ul>                                                                                                                                                                                                                                                                                                                                                                                                                                                                                                                                                                                                                                                                                                                                                                                                                                                                                                                                                                                                                                                                                                                                                                                                                                                                                                                                                                                                                                                                                                                                                                                                                                                                                                       |
| Barriers to timely surgery for breast cancer in Rwanda Lauren E. Schleimer 2019                                                                                    | Breast                                                       | Regional Rwanda  | 1st January 2014 to 31 December 2015 | Patients   | 151 Case note     | <p>Female 144</p> <p>Male 7Median age 54 (27-84)</p>                                                                                                                                                                                                                                                                                   | <ul style="list-style-type: none"> <li>-Surgeon/operating room availability</li> <li>-Management of pregnancy</li> <li>-Inoperable, referred for second opinion</li> <li>-Chemotherapy toxicity</li> <li>-Patient refused breast surgery 4</li> <li>-Patient refused referral for off-site operative treatment</li> </ul> <p>-Financial/social issues</p> <ul style="list-style-type: none"> <li>-Financial/social issues</li> <li>-Seeking traditional medicine</li> <li>-Seeking care abroad</li> </ul>                                                                                                                                                                                                                                                                                                                                                                                                                                                                                                                                                                                                                                                                                                                                                                                                                                                                                                                                                                                                                                                                                                                                                                                                                                                                                                                                                                                                                                                                                            |
| Delays in breast cancer presentation and diagnosis at two rural cancer referral centers in Rwanda Lydia E. Pace 2015                                               | Breast                                                       | National Rwanda  | November 2012 - February 2014        | Patients   | 144 Questionnaire | <p>not stated not statedSingle, widowed or divorced 73 (51%)</p> <p>Married 71 (49%)None or primary school 108 (75%)</p> <p>Secondary school or university 36 (25%)100% femalemedian age 49 years</p> <p>&lt;40 32 (22%)</p> <p>40,41-49 43 (30%)</p> <p>50,51-59 43 (30%)</p> <p>&gt;60 26 (18%)</p>                                  | <p>&lt;2 hr 117 (81%)</p> <p>&gt;=2 hr 57 (19%)</p> <p>CHW who visits regularly 51 (35%)</p> <ul style="list-style-type: none"> <li>-not stated - patients who visited other healthcare facilities &gt;=5 times before diagnosis were more likely to experience system delays of &gt;6 months (OR, 2.69; 95% CI, 1.24-5.84;p&lt;0.01).</li> <li>-Patients residing in Butaro or Rwinkwavudistrict were less likely to experience long system delays (OR, 0.05; 95% CI, 0.004-0.55; p=0.02)delay of &gt;=6 months:</li> <li>-low education (odds ratio [OR], 4.88; 95% CI 1.72-13.88; p=0.003;</li> <li>-seeing a traditional healer before a nurse or doctor (OR, 4.26; 95% CI, 1.56-11.60; p=0.005);none- visited another health center or hospital first and was not referred to this hospital immediately</li> <li>- needed a transfer form from another facility before coming here</li> <li>- too expensive to travel from home to</li> <li>-was told by healthcare worker there was no treatment for thidisease</li> <li>- The hospital was too far to travel to - not bothered by the problem at first</li> <li>- did not know I needed to see a doctor and thought it would go away</li> <li>- visited a traditional healer first</li> <li>- thought treatment might be too expensive</li> <li>- too busy at home or at my job</li> <li>- afraid it might be cancer</li> <li>- afraid of treatments, including potentially losing breast</li> <li>- afraid of possibly dying if breast removed</li> <li>- too expensive to travel to the health center or hospital</li> <li>- did not know where an appropriate medical facility was</li> <li>- did not want anyone knowing had a breast problem</li> <li>- afraid of being examined by a doctor or other healthcare provider</li> <li>- had or knew someone who had a bad experience at a health center or hospital</li> <li>- The health center or hospital was too far</li> <li>- did not know that this cancer center existed</li> </ul> |

|                                                                                                                                              |                                                |                              |                                        |                                                                |                                             |                                                                                                                                                                                                                                                                                                                                                                                                                                                   |                                                                                                                                                                                                                                                                       |                                                                                                                                                                                                                                                                                                                                                                                                                                                                                                                                                                                                                                                                                                                                                                                                                                                                                                                                                                                                                                                                                                                                                                                                                                                                                                                                                                                                                                                                                                                                                                                                                                                                                                                                                                                                                                                                                                                                                                       |
|----------------------------------------------------------------------------------------------------------------------------------------------|------------------------------------------------|------------------------------|----------------------------------------|----------------------------------------------------------------|---------------------------------------------|---------------------------------------------------------------------------------------------------------------------------------------------------------------------------------------------------------------------------------------------------------------------------------------------------------------------------------------------------------------------------------------------------------------------------------------------------|-----------------------------------------------------------------------------------------------------------------------------------------------------------------------------------------------------------------------------------------------------------------------|-----------------------------------------------------------------------------------------------------------------------------------------------------------------------------------------------------------------------------------------------------------------------------------------------------------------------------------------------------------------------------------------------------------------------------------------------------------------------------------------------------------------------------------------------------------------------------------------------------------------------------------------------------------------------------------------------------------------------------------------------------------------------------------------------------------------------------------------------------------------------------------------------------------------------------------------------------------------------------------------------------------------------------------------------------------------------------------------------------------------------------------------------------------------------------------------------------------------------------------------------------------------------------------------------------------------------------------------------------------------------------------------------------------------------------------------------------------------------------------------------------------------------------------------------------------------------------------------------------------------------------------------------------------------------------------------------------------------------------------------------------------------------------------------------------------------------------------------------------------------------------------------------------------------------------------------------------------------------|
| Prevalence of breast masses and barriers to care: Results from a population-based survey in Rwanda and Sierra Leone Faustin Ntirenganya 2014 | **Breast masses not specified if cancer or not | National Rwanda Sierra Leone | October 2011 - January 2012            | Community                                                      | Sierra Leone 3645 Rwanda 3175 Questionnaire | *women with breast masses<br>Sierra Leone, n=57: None 10 Home maker 7 Domestic help 2 Farmer 26 Self employed/small business 12<br>Rwanda, n=79: None 9 Home maker 0 Domestic help 0 Farmer 70 Self employed/small business 0 not stated<br>not stated<br>*women with breast masses<br>Sierra Leone, n=57: None 38 (66.7%) Primary 3 (5.3%) Secondary 14 (24.6%) Tertiary 2 (3.5%)<br>Rwanda, n=79: None 33(41.8%) Primary 44 (55.7%) Secondary 2 | not stated                                                                                                                                                                                                                                                            | n/an/an/ not stated-lack of money (Sierra Leone 35.1% Rwanda 11.4%)- absence of disability associated with breast mass<br>-lack of trust in the health care system<br>-long distance required to reach the provider<br>-stigma associated with having a breast problem<br>-consulted traditional healers instead of going to health centers                                                                                                                                                                                                                                                                                                                                                                                                                                                                                                                                                                                                                                                                                                                                                                                                                                                                                                                                                                                                                                                                                                                                                                                                                                                                                                                                                                                                                                                                                                                                                                                                                           |
| Consensus study on the health system and patient-related barriers for lung cancer management in South Africa Witness Mapanga 2021            | Lung                                           | Regional South Africa        |                                        | clinical managers clinicians public health opinion leaders NGO | 27 Delphi process, nominal group technique  | oncologists pulmonologists thoracic surgeons pathologists radiologists oncology nurses medical officers NGO representatives                                                                                                                                                                                                                                                                                                                       |                                                                                                                                                                                                                                                                       | - Poor nutrition<br>-Lack of smoking cessation clinics<br>-Costs of medical treatments<br>-Repeated visits for misdiagnoses for TB-patients lose faith in the health system and go to GPs<br>-Failure to come back for follow up diagnostic or treatment appointments<br>-Patients changing their mobile numbers and then cannot be contacted or may not answer their phones from unidentified callers-fearing debt collection.<br>-Patients endure bureaucracy at health care facilities ID, proof of residence, articulation of chief complaint<br>-Language barriers between patients and healthcare practitioners and thus difficult communications and understanding of doctor information<br>-Long delays to get appointments ,long waiting periods in clinics and long queues for high patient volumes and for diagnostic tests compounded by early closing times<br>-Primary health care is nurse driven and doctor supported-lung cancer not prioritized as a diagnosis-and not listed in the index of disease conditions<br>- Misdiagnosis linked with superficial examinations-over emphasis on more common HIV and TB pneumonia with a low index of suspicion for lung cancer<br>-Delays in getting diagnostic workup test results for imaging, cytology, pathology and surgery<br>-Unwillingness for health care workers to consider a cancer diagnosis because of the inability to break bad news and/or accompany the patient through the journey of care<br>-Administration hassles-no referral forms, lack of hospital transport for referrals, obtaining informed consent, booking appointment for referrals<br>-Patient health awareness messaging within primary resources is not structured and sustained with no CHC outreach to the community<br>-Insufficient information on the prevalence of lung cancer and how best to manage it<br>-Using sputum only to diagnose cancer<br>-Biological specimens eg pleural fluid not sent for analysis |
| Delay to diagnosis and breast cancer stage in an urban south african breast clinic S Rayne 2019                                              | Breast                                         | Hospital South Africa        | January 2016 - February 2017           | Patients                                                       | 252 Questionnaire                           | Unemployed, piece student or retired<br>-early stage 55 (34.8%)<br>-locally advanced 103 (65.2%)<br><br>Employed, job<br>- early presentation 17 (27.0%)<br>- advanced locally 46 (73.0%) Only primary school<br>-early presentation 21 (30.4%)<br>-locally advanced 48 (69.6%)<br><br>Secondary school or above<br>- early presentation 52 (84.9%)<br>- locally advanced 97 (65.1%) <45 yrs )                                                    | Travel to breast clinic:<br><30 minutes<br>-early stage 12 (30.8%)<br>-locally advanced 27 (69.2%)<br><br>30 minutes - 1 hour<br>-early stage 26 (35.1%)<br>-locally advanced 73 (69.5%)<br><br>1 - 4 hours<br>-early stage 26 (35.1%)<br>locally advanced 48 (64.9%) | lack of internet access 51 (35.9%in early stage and 91(64.1%) in late stage) was associated with delay in acknowledging breast symptoms (p=0.051).<br>-work<br>-transport<br>-money<br><br>- low education (up to Grade 7)<br>- longer travel time to hospital                                                                                                                                                                                                                                                                                                                                                                                                                                                                                                                                                                                                                                                                                                                                                                                                                                                                                                                                                                                                                                                                                                                                                                                                                                                                                                                                                                                                                                                                                                                                                                                                                                                                                                        |
| From symptom discovery to treatment - women's pathways to breast cancer care: A cross-sectional study Jennifer Moodley 2018                  | Breast                                         | Hospital South Africa        | May 2015 to June 2016                  | Patients                                                       | 201 Questionnaire                           | Employed 51 (25.4%)<br>Married 84 (41.8%)<br>Single in stable relationship 6 (3.0%)<br>Single 42 (20.9%)<br>Widowed 38 (18.9%)<br>Divorced/separated 31 (15.4)None-Grade 7 49 (24.4%)<br>Grade 8-Grade 11 96 (47.8%)<br>Grade 12 56 (27.9%)Female<br>=201median age 54                                                                                                                                                                            |                                                                                                                                                                                                                                                                       | - surgery as first treatment-visiting multiple clinics-first symptom as being minor or not serious,<br>-being in denial.<br>-only seeking care when a lump increased                                                                                                                                                                                                                                                                                                                                                                                                                                                                                                                                                                                                                                                                                                                                                                                                                                                                                                                                                                                                                                                                                                                                                                                                                                                                                                                                                                                                                                                                                                                                                                                                                                                                                                                                                                                                  |
| Access to colorectal cancer (CRC) chemotherapy and the associated costs in a South African public healthcare patient cohort Candice-lee      | Colorectal                                     | Hospital South Africa        | 2012 - 2014                            | Patients                                                       | 162 Case note                               | not stated not statednot statednot statedFemale 73 Male 89median 58 years                                                                                                                                                                                                                                                                                                                                                                         | not stated                                                                                                                                                                                                                                                            | not statednot statednot statednot statednot statednot stated                                                                                                                                                                                                                                                                                                                                                                                                                                                                                                                                                                                                                                                                                                                                                                                                                                                                                                                                                                                                                                                                                                                                                                                                                                                                                                                                                                                                                                                                                                                                                                                                                                                                                                                                                                                                                                                                                                          |
| Barriers to early presentation of breast cancer among women in Soweto, South Africa Maureen Joffe 2018                                       | Breast                                         | Hospital South Africa        | 8th January 2015 to 31st December 2016 | Patients                                                       | 499 Questionnaire                           | Unemployed 229 (45.9%)<br>Employed 136 (27.2%)<br>Retired 134 (26.9%)<br>Single 119 (24.0%)<br>Married/co-habiting 216 (43.6%)<br>Divorced/widowed 161 (32.4%)Completion of informal/primary 142 (28.5%)<br>Completion of high school/any tertiary school 348 (71.5%)Female 499<40 yrs 69 (13.8%)<br>40 -49 yrs 124 (24.8%)<br>50-59 yrs 120 (24.1%)<br>60-69 yrs 102 (20.4%)<br>70 and above 84 (16.8%)                                          |                                                                                                                                                                                                                                                                       | - increase in parity OR1.10,95%CI:0.99-1.21<br>-Patients aged<40years OR=1.93,95%CI:1.05-3.58<br>-luminal B OR = 1.86, 95% CI:1.10-3.14 and<br>-triple negative breast cancer subtypes OR=2.61,95%CI:1.69-4.50<br>-Clinical waiting time as a barrier n=23 (9.5%) were in early stage while 19 (7.4%) were in late stage. p-value 0.411, chi square 0.675<br>-Most participants 323(64.7%,166 in early stage and 157) referred themselves to CHBAH or were referred directly by a primary care clinic or a private general practitioner, by passing the secondary hospitals. Among those patients,251(77.7%, 143 early stage, 108 late stage) had only one visit prior to diagnosis. Those with more visits before reaching CHBAH were more likely to be diagnosed at a late stage(α=0.001).<br>-49(15.2%, 18 in early stage, 31 in late stage) had 2 visits self referral /primary health facility<br>->3 visits self referral /primary health facility 23 (7.1%, 5 in early stage and 18 in late stage)<br>-<br>-Fear of diagnosis<br>-Thought it was a minor ailment<br>- No one to look after the children<br>-Worried no money for treatment                                                                                                                                                                                                                                                                                                                                                                                                                                                                                                                                                                                                                                                                                                                                                                                                                     |

|                                                                                                                                                                                               |                                                                                                                                                                                                 |                       |                                 |          |                           |                                                                                                                                                                                                                                                                                                                                                                                                                                                      |                                                                                                                                                                             |                                                                                                                                                                                                                                                                                                                                                                                                                                                                                                                                                                                                                                                                                                                                                                                                                                                                                                                                                                                                                                                                                                                                                                                                                                                                                                                                                                                             |
|-----------------------------------------------------------------------------------------------------------------------------------------------------------------------------------------------|-------------------------------------------------------------------------------------------------------------------------------------------------------------------------------------------------|-----------------------|---------------------------------|----------|---------------------------|------------------------------------------------------------------------------------------------------------------------------------------------------------------------------------------------------------------------------------------------------------------------------------------------------------------------------------------------------------------------------------------------------------------------------------------------------|-----------------------------------------------------------------------------------------------------------------------------------------------------------------------------|---------------------------------------------------------------------------------------------------------------------------------------------------------------------------------------------------------------------------------------------------------------------------------------------------------------------------------------------------------------------------------------------------------------------------------------------------------------------------------------------------------------------------------------------------------------------------------------------------------------------------------------------------------------------------------------------------------------------------------------------------------------------------------------------------------------------------------------------------------------------------------------------------------------------------------------------------------------------------------------------------------------------------------------------------------------------------------------------------------------------------------------------------------------------------------------------------------------------------------------------------------------------------------------------------------------------------------------------------------------------------------------------|
| Factors relating to late presentation of patients with breast cancer in area 2 KwaZulu-Natal, South Africa Sharon R Cacala 2017                                                               | Breast                                                                                                                                                                                          | Hospital South Africa | 2014                            | Patients | 172 Other: Prospective    | - employed 27% -never attended school 19% - completed high school 19% -Average education level: 6th grade women 172mean age was 56 yrs (range 23 to 100 yrs)                                                                                                                                                                                                                                                                                         | <5 km from hospital, n=183<br>5 - 9.9 km from hospital, n=299<br>10 - 19.9 km from hospital, n=242<br>20 - 29.9 km from hospital, n=188<br>30 - 39.9 km from hospital, n=61 | - financial issues<br>- transportation issues<br>- difficulty with the referral system and rural clinics - unaware that the lump could be cancer<br>- did not understand severity<br>- fear<br>- afraid of losing a breast<br>- seeing a traditional healer<br>- financial issues<br>- transportation issues                                                                                                                                                                                                                                                                                                                                                                                                                                                                                                                                                                                                                                                                                                                                                                                                                                                                                                                                                                                                                                                                                |
| Stage at breast cancer diagnosis and distance from diagnostic hospital in a periurban setting: A South African public hospital case series of over 1,000 women Caroline Dickens 2014          | Breast                                                                                                                                                                                          | Hospital South Africa | 2006 - 2012                     | Patients | 1071 Retrospective cohort | not stated <5 km from hospital, n=183: <= R9600 - 29.4% <= R800 - 50.3%<br>5 - 9.9 km from hospital, n=299: <= R9600 - 27.4% <= R800 - 51.2%<br>10 - 19.9 km from hospital, n=242: <= R9600 - 24.7% <= R800 - 49.3%<br>20 - 29.9 km from hospital, n=188: <= R9600 - 32.9% <= R800 - 61.0%<br>30 - 39.9 km from hospital, n=61: <= R9600 - 27% <= R800 - 58%<br>not stated 152 women with primary education or less <5 km from hospital n=183: 14.6% | <5 km from hospital, n=183<br>5 - 9.9 km from hospital, n=299<br>10 - 19.9 km from hospital, n=242<br>20 - 29.9 km from hospital, n=188<br>30 - 39.9 km from hospital, n=61 | Not stated<br>- older patients (RR 1.03[95% CI: 0.99, 1.07]<br>- before 2008 (RR 1.34 [95% CI: 1.17, 1.53])<br>- living 30-39km from hospital (95% CI: 11, 75)<br>Not stated Not stated Not stated Not stated                                                                                                                                                                                                                                                                                                                                                                                                                                                                                                                                                                                                                                                                                                                                                                                                                                                                                                                                                                                                                                                                                                                                                                               |
| Predictors of cervical cancer being at an advanced stage at diagnosis in Sudan Ahmed Ibrahim 2011                                                                                             | cervical cancer                                                                                                                                                                                 | Hospital Sudan        | 1 January 2007 to December 2007 | Patients | 197 Retrospective cohort  | not stated<br>Single 60 (30.5%)<br>Married 137 (69.5%)<br>Basic school 122 (61.9%)<br>Secondary school 75 (38.1%)<br>100% female<br>54 73 (37.1%)<br>>=55 124 (62.9%)                                                                                                                                                                                                                                                                                | not stated                                                                                                                                                                  | not stated<br>- older (>= 55 years) (OR: 1.03, 95% CI: 1.01-1.05).<br>- Rural residence (OR: 1.13, 95% CI: 1.78-5.50).<br>- African ethnicity (OR: 1.76, 95% CI: 1.01-3.05).<br>- without health insurance (OR: 7.7, 95% CI: 3.76-15.38) not stated not stated not stated not stated                                                                                                                                                                                                                                                                                                                                                                                                                                                                                                                                                                                                                                                                                                                                                                                                                                                                                                                                                                                                                                                                                                        |
| Educational Opportunities for Low-Staging Breast Cancer in Down-Income Countries: an Example from Tanzania Kristen Yang 2019                                                                  | Breast                                                                                                                                                                                          | Hospital Tanzania     | January 2016 - August 2018      | Patients | 196 Questionnaire         | not stated<br>not stated<br>not stated<br>not stated<br>not stated<br>mean age early: 51.5 +/- 10.3<br>late: 51.6 +/- 12.9                                                                                                                                                                                                                                                                                                                           | not stated                                                                                                                                                                  | not stated<br>- never had a routine breast exam conducted prior to their diagnosis (OR = 4.40; 95% CI = 2.09-9.25)<br><br>not stated not stated - financial restraints<br>- time restraints not stated                                                                                                                                                                                                                                                                                                                                                                                                                                                                                                                                                                                                                                                                                                                                                                                                                                                                                                                                                                                                                                                                                                                                                                                      |
| Patient and disease characteristics associated with late tumour stage at presentation of cervical cancer in northwestern Tanzania Ramadhani Mlangi 2016                                       | Cervical                                                                                                                                                                                        | Hospital Tanzania     | November 2013 - April 2014      | Patients | 202 Questionnaire         | Peasant 170 (84.1%)<br>Petty trader 20 (9.9%)<br>Business 2 (0.9%)<br>Employed 5 (2.4%)<br>Un-employed 5 (2.4%)<br>not stated Married 110 (54.4%)<br>Single 9 (4.4%)<br>Divorced 10 (4.9%)<br>Separated 39 (19.3%)<br>Windowed 34 (16.8%)<br>Formal 87 (43.1%)<br>None formal (115 (56.9%))<br>100% female<br>mean 50.5 +/- 13.3 years (25-80 years)<br><40 45 (22.2%)<br>40-59 101 (50.0%)<br>>=60 56 (27.7%)                                       | not stated                                                                                                                                                                  | not stated<br>-Lack of formal education, OR=2.1, 95% CI 1.2 - 3.8, p=0.012<br>-Lack of health insurance, OR=3.9, 95% CI 1.1-13.3, p=0.033<br>-three or more pre-referral visits OR=1.9, 95% CI 1.1-3.5, p=0.034<br>- attending to traditional health practitioners OR = 2.3 [95% CI 1.2-4.2], p= 0.011<br>-lack of personal initiative to attend health care facility OR = 2.0 [95% CI 1.0-3.8], p= 0.028) not stated Seeking alternative health practitioner<br>Lack of personal initiative                                                                                                                                                                                                                                                                                                                                                                                                                                                                                                                                                                                                                                                                                                                                                                                                                                                                                                |
| Engagement in HIV Care and Access to Cancer Treatment Among Patients With HIV-Associated Malignancies in Uganda. Daniel H. Low 2019                                                           | HIV associated malignancies: KS (46%) cervical cancer (19%) breast cancer (10%) esophageal cancer (6%) head and neck cancer (5%) non-Hodgkin lymphoma (4%) vulvovaginal cancer (4%) others (6%) | Hospital Uganda       | October 2015 - January 2016     | Patients | 100 Questionnaire         | Employed 34, n=100<br>not stated<br>not stated<br>100<br>32<br>Incomplete primary school 36<br>Complete primary school 18<br>Some secondary school 30<br>Complete secondary school 16 Female 52%<br>Male 48%<br>median 41 years                                                                                                                                                                                                                      | ?n=104<br>< 25 km 24<br>25-49 km 23<br>50-99 km 12<br>>100 km 55                                                                                                            | -diagnostic delay (44v117 days for those not receiving HIV care; P=.048) - travel to multiple clinics/hospitals (n = 18; 46%),<br>-conflicts between appointments for HIV and cancer care (n = 9; 23%)<br>-treatment costs (n = 8; 21%)<br>-difficulty adhering to the quantity of medications (n = 6; 15%)<br>-stigma<br>- Reporting any barrier to care at follow-up was associated with having prematurely withdrawn from cancer care (36%v0%; 95%CI, 21% to 51%; relative risk not calculable; P=.003<br>-Distance from place of residence to the UCI was not associated with reporting of a barrier to care; however, those who prematurely withdrew from care AF1 lived farther from the UCI than those who completed all prescribed cancer treatment (median distance, 172.5v40 km; P=.056)-Shorter time from recognizing symptoms to initiation of cancer care was associated with having previously established HIV care (P=.04).<br>-Having previously established HIV care reduced appraisal/behavioral delay (30v75 days for those not al-ready receiving HIV care; P=.02)<br>-Persons who were receiving ART before recognizing the symptoms determined to be associated with cancer had a total cascade duration of 207 days (OR, 109 to 320 days), compared with those not receiving AF3ART (318 days; IQR, 155 to 537 days; P=.004). diagnostic delay not stated not stated |
| Social, demographic and healthcare factors associated with stage at diagnosis of cervical cancer: cross-sectional study in a tertiary hospital in Northern Uganda. Amos Deogratius Mwaka 2015 | Cervical                                                                                                                                                                                        | Hospital Uganda       | September 2012 to April 2014    | Patients | 149 Questionnaire         | Housewife/peasant 132 (88.6%)<br>Petty trader 10 (6.7%)<br>Formally employed 4 (2.7%)<br>Missing 3 (2.0%)<br>not stated Married 84 (56.4%)<br>Divorced 21 (14.1%)<br>Widowed 44 (29.5%)<br>No formal education 67 (45.0%)<br>Primary education 72 (48.3%)<br>Secondary education 7 (4.7%)<br>Tertiary education 2 (1.3%)<br>Missing 1 (0.7%)<br>100% female<br>mean age 48 +/- 13 years                                                              | <40 km 41 (27.5%)<br>40-80 km 35 (23.5%)<br>81-100 km 13 (8.7%)<br>101-375 km 58 (38.9%)                                                                                    | -the odds of advanced stage cancer among patients who self-reported financial difficulty are 5.7 times (95% CI 1.58 to 20.64) the odds of advanced cancer among the patients who did not report financial difficulty as a reason for non-prompt health seeking-the OR of advanced stage cervical cancer among patients who perceived their symptoms as due to a serious illness or cancer was 0.43 times (95% CI 0.20 to 0.96) the OR of those who perceived their symptoms as not due to a serious illness/cancer<br>-In bivariate analyses, participants with secondary and tertiary education were less likely to be diagnosed with advanced stage cancer compared to those who had not attained formal education (crude OR=0.16 (95% CI 0.03 to 0.87).<br>- patients who reported lack of money as reason for non-prompt health seeking were more likely to be diagnosed at advanced stage cancer.<br>-pre-referral diagnoses by primary healthcare professional non-cancer related or not told: 61-lack of money: 108-symptoms not attributed to cancer: 130<br>-using other treatments: 60<br>-perceived illness as not serious or cancer: 58                                                                                                                                                                                                                                         |



|                                                                                                                                                                             |                                                                                                          |                                                    |                                 |                         |                                                                                |                                                                                                                                                                                                                                                                                                                                                                                                                                                |                                                                                                                                                                                                                                                                     |                                                                                                                                                                                                                                                                                                                                                                                                                                                                                                                                                                                                                                                                                                                                                                                             |
|-----------------------------------------------------------------------------------------------------------------------------------------------------------------------------|----------------------------------------------------------------------------------------------------------|----------------------------------------------------|---------------------------------|-------------------------|--------------------------------------------------------------------------------|------------------------------------------------------------------------------------------------------------------------------------------------------------------------------------------------------------------------------------------------------------------------------------------------------------------------------------------------------------------------------------------------------------------------------------------------|---------------------------------------------------------------------------------------------------------------------------------------------------------------------------------------------------------------------------------------------------------------------|---------------------------------------------------------------------------------------------------------------------------------------------------------------------------------------------------------------------------------------------------------------------------------------------------------------------------------------------------------------------------------------------------------------------------------------------------------------------------------------------------------------------------------------------------------------------------------------------------------------------------------------------------------------------------------------------------------------------------------------------------------------------------------------------|
| Challenges faced by cancer patients in Uganda: Implications for health systems strengthening in resource limited settings Annet Nakaganda 2020                              | Cervix 72 (20%)<br>Kaposi's sarcoma 71 (20%)<br>Breast 46 (13%)<br>Prostate 19 (5%)<br>Esophagus 16 (4%) | Hospital Uganda                                    | April to May 2017               | Patients                | 359<br>Questionnaire                                                           | Self Employed 87 (24%)<br>Unemployed 82 (23%)<br>Stopped working due to cancer 70 (20%)<br>Casual employment 61 (17%)<br>Formal employment 39 (11%)<br>Other 20 (6%) -<br>Married 143 (43%)<br>Single 77 (21%)<br>Living together 61 (17%)<br>Separated/divorced 47 (13%)<br>Widow/Widower 31 (9%)<br>Primary level 147 (41%)<br>Secondary level 97 (27%)<br>College/University education level 71 (20%)<br>Female 199 (55%)<br>average age 43 |                                                                                                                                                                                                                                                                     | -lack of money for treatment, medicines and transportation.<br>-family responsibilities<br>-not healthy enough to continue treatment<br>-failure to find accommodation in Kampala -lack of money for transportation.<br>-family responsibilities<br><br>-lack of money for transportation.<br>-family responsibilities                                                                                                                                                                                                                                                                                                                                                                                                                                                                      |
| Surgical candidacy and treatment initiation among women with cervical cancer at public referral hospitals in Kampala, Uganda: A descriptive cohort study Megan Swanson 2020 | cervical                                                                                                 | Hospital Uganda                                    | April 2017 - September 2018     | Patients                | 268<br>Questionnaire                                                           | Industry/business 92<br>Farming/domestic 175<br>not stated<br>Married 121<br>Single/divorced/widowed 146<br>Less than primary 110<br>Higher than primary 151<br>100% Female<br>≥50 years 123<br>50 years 133                                                                                                                                                                                                                                   | > 15 km 181<br><= 15 km 86                                                                                                                                                                                                                                          | The statistics were executed to reflect chance of receiving treatment rather than delay - see comment box<br>not stated - financial constraints, including lack of funds to pay for travel and the nominal fees associated with radiation, surgery and diagnostic tests (69%)<br>- long wait times (30%)<br>not stated                                                                                                                                                                                                                                                                                                                                                                                                                                                                      |
| Prognosis and delay of diagnosis among Kaposi's sarcoma patients in Uganda: A cross-sectional study Christopher De Boer 2014                                                | Kaposi sarcoma                                                                                           | Hospital Uganda                                    | June to October 2012            | Patients                | 161<br>Other: case notes and standardized interviews                           | <100,000 UGSH =90 (58.1%)<br>100K - 500K UGSH =59 (38.1%)<br>>500,000 UGSH =6 (3.9%)<br>Primary 83 (51.6%)<br>Secondary 58 (36.0%)<br>Tertiary or degree 20 (12.4%)<br>Male 111 (68.9%)<br>Female 50 (31.1%)<br><30 =44 (28.0%)<br>31-40 =85 (54.1%)<br>>40 =28 (17.8%)                                                                                                                                                                        |                                                                                                                                                                                                                                                                     | - paid out of pocket tests or chemotherapy, 68 (42.2% p value 0.001) - visitation to a traditional healer was associated with experiencing diagnostic delay (OR 2.69, p = 0.020, 95% CI: 1.17-6.17). - visited a traditional healer 41 (25.5% p value 0.872)<br>-Lack of money for transportation<br>- Distance to UCI<br>-Lack of money for transportation<br>- Distance to UCI                                                                                                                                                                                                                                                                                                                                                                                                            |
| Inequities in breast cancer treatment in sub-Saharan Africa: Findings from a prospective multi-country observational study Milena Foerster 2019                             | Breast                                                                                                   | Hospital Uganda<br>Nigeria<br>Namibia              | September 2014 - yearly 2016    | Patients                | 1335<br>Other: Prospective multi-centric                                       | Unskilled jobs 923 (70%)<br>- not treated 172 (18.8%)<br>treated 751 (81.2%)<br>Skilled 503 (30%)<br>- not treated 55 (13.8%)<br>treated 348 (68.2%)<br>Not stated<br>Not stated<br>100% female<br>mean age 50.7 (SD = 13.6)                                                                                                                                                                                                                   | Not stated                                                                                                                                                                                                                                                          | - BMI p=0.023<br>< 18.5 1.58 (0.70 to 3.59) AND 1.83 (0.79 to 4.21)<br>30+ 1.76 (1.10 to 2.81) AND 1.53 (0.95 to 2.47)<br>- Belief in spiritual healing p=0.004<br>Yes 1.18 (0.83 to 1.68) 1.21 (0.84 to 1.21)<br>not stated - cost<br>- personal decision e.g (lack of belief in effectiveness, fear or non compliance to or rejection of therapy)<br>not stated                                                                                                                                                                                                                                                                                                                                                                                                                           |
| Dissecting the journey to breast cancer diagnosis in sub-Saharan Africa: Findings from the multicountry ABC-DO cohort study Milena Foerster 2020                            | Breast                                                                                                   | Hospital Uganda,<br>Zambia,<br>Namibia,<br>Nigeria | September 2014 - September 2017 | Patients                | 1429<br>Other: Interviews                                                      | Unskilled 1007 (70.5%)<br>Skilled 242 (29.5%)<br>Low SEP 810 (56.7%)<br>medium/high SEP 439 (43.3%)<br>Not married 710 (49.7%)<br>Married 539 (50.3%)<br>Primary/no education 628 (44.0%)<br>Secondary/higher 801 (56%)<br>100% female<br>mean 50.1                                                                                                                                                                                            | Not stated                                                                                                                                                                                                                                                          | -Age IRR 1.26 (0.89-1.79)<br>-Low SEP IRR 1.10 (0.93-1.30)<br>-Not married (only for Namibia, p<0.001) IRR 2.63 (1.22-5.64) and 1.28 (0.90-1.80) non blacks and blacks<br>- Primary/no education IRR 1.16 (0.98-1.37), (not for Namibia non black p=0.037)<br>-Unskilled labour IRR 1.22 (1.01-1.47)<br>-Belief in traditional medicine IRR 1.03 (0.87-1.22), (only for Nigeria and Zambia, p=0.007)<br>-Recent birth IRR 1.08 (0.84-1.38)<br>-HIV positive (only for Namibia-blacks and Zambia, p=0.022) IRR 1.11 (0.70-1.76) and 2.12 (0.97-4.62) respectively<br>-First symptom lump IRR 1.42 (1.14-1.76)-told not to worry<br>-wrong diagnosis-lack of transport<br>-transport costs-pain<br>-fear                                                                                      |
| Health system constraints affecting treatment and care among women with cervical cancer in Harare, Zimbabwe O. Tapera 2019                                                  | cervical                                                                                                 | Regional Zimbabwe                                  | January to April 2018           | Patients and clinicians | 212:<br>-patients 134<br>- health workers 78<br>Other: questionnaire, IDI, FGD | female patients 134<br>male how 15<br>female how 63<br>patients mean age 50.2<br>untreated cervical cancer and 52.9 for those with treated cancer<br>health workers mean age 37.3 yrs                                                                                                                                                                                                                                                          | Distance from nearest cervical cancer screening health facility<br><10 km untreated 5 (12%)<br>treated 30 (33%)<br>11-50km untreated 4 (10%)<br>treated 18 (19%)<br>> 50km untreated 1 (2%)<br>treated =7 (8%)<br>Don't know untreated 32 (76%)<br>treated 37 (40%) | Women:<br>-inability to see specialist<br>- less access to regular general practitioners<br>- paying out of pocket for health services<br>Health care workers<br>-inadequate training of HCW for cervical cancer treatment and care.<br>- not knowing or having read both the National Cancer Prevention and Control Strategy (2013-2017) and the Cervical Cancer Prevention and Control Strategy for Zimbabwe (2016-2020)<br>-not enough health professionals to meet the demand of services in health facilities<br>-weak surveillance system for cervical cancer<br>-unavailability of back-up for major equipment- didn't know estimated distances from their residence to the nearest cervical cancer screening<br>-lack of finances. - Financial challenges<br>- transport challenges |
