# Supplementary material for: Delays in seeking, reaching and access to quality cancer care in sub-Saharan Africa: a systematic review
Source: PubMed Central journal article supplement — BMJ Open. 2023 Apr 13;13(4):e067715. doi: 10.1136/bmjopen-2022-067715 (PMC10106057; doi:10.1136/bmjopen-2022-067715), 2023-04-13
Supplement: bmjopen-2022-067715supp003.pdf [file bmjopen-2022-067715supp003.pdf]

| Table 1. Exposure-Outcome relationship for cohort studies |                                                                                    |                                                                |
|-----------------------------------------------------------|------------------------------------------------------------------------------------|----------------------------------------------------------------|
| Author                                                    | Exposure                                                                           | Outcome                                                        |
| Cacala 2017                                               | Breast Cancer pathway to diagnosis (symptom appraisal to presentation to clinic)   | Late presentation of Breast Cancer (T-stage)                   |
| De Boer 2014                                              | Kaposi's Sarcoma pathway to diagnosis                                              | Delay in diagnosis of Kaposi's Sarcoma (Poor outcomes)         |
| Dickens 2014                                              | Distance from diagnostic hospital to treatment center                              | Stage of breast cancer at diagnosis                            |
| Foerster 2019                                             | Breast Cancer Pathway to treatment                                                 | Receipt of treatment                                           |
| Gebremariam 2021                                          | Breast Cancer Care pathway to chemotherapy                                         | Time to initiation of chemotherapy                             |
| Ibrahim 2011                                              | Cervical cancer pathway to diagnosis (symptom appraisal to presentation to clinic) | Advanced stage disease                                         |
| Jedy-Agba 2017                                            | Breast Cancer Pathway to diagnosis                                                 | Stage at diagnosis                                             |
| Knapp 2020                                                | Geospatial access                                                                  | Cancer stage at diagnosis                                      |
| Martei 2019                                               | Chemotherapy stock out                                                             | Suboptimal therapy delivery                                    |
| Page 2019                                                 | Positive HPV test                                                                  | Acceptance and adherence to diagnostic procedure and treatment |
| Schleimer 2019                                            | Pathway from diagnosis to surgery                                                  | Delay to appropriate operative treatment                       |
| Tesfaw 2020                                               | Breast Cancer diagnostic pathway; patient delay > 3 months                         | Advanced stage of cancer at diagnosis                          |
| Zelege 2021                                               | Cervical Cancer Diagnostic pathway                                                 | Stage IIIA-IVB presentation                                    |
